# Supplementary material for: Palladium-catalyzed multi-component Heck alkynylcarbonylation of unactivated alkenes for synthesis of β,γ-alkynoates
Source: Royal Society of Chemistry journal article supplement (doi:10.1039/d4qo00504j), 2024-01-01
Supplement: d4qo00504j1.pdf [file d4qo00504j1.pdf]

## SUPPORTING INFORMATION

### Supporting Information

#### Palladium-Catalyzed Multi-component Heck Alkynylcarbonylation of Unactivated Alkenes for Synthesis of $\beta,\gamma$ -Alkynoates

Xin Peng,<sup>a</sup> Huanliang Hong,<sup>a</sup> Li Wang,<sup>a</sup> Lu Chen,<sup>a</sup> Jinbao Peng,<sup>a</sup> Yibiao Li,<sup>\*a,c</sup> and Huanfeng Jiang<sup>\*b</sup>

<sup>a</sup> Jiangmen Key Laboratory of Synthetic Chemistry and Cleaner Production, School of Environmental & Chemical Engineering, Wuyi University, Jiangmen 529020, China.

<sup>b</sup> Key Lab of Functional Molecular Engineering of Guangdong Province, School of Chemistry and Chemical Engineering, South China University of Technology, Guangzhou 510641, China.

<sup>c</sup> College of Chemistry and Materials Science, Jinan University, Guangzhou 510632, Guangdong Province, China

Email: [leeyib268@126.com](mailto:leeyib268@126.com) (Y.-B. Li); [Jianghf@scut.edu.cn](mailto:Jianghf@scut.edu.cn) (H.-F. Jiang)

#### Table of Contents

|                                                                         |     |
|-------------------------------------------------------------------------|-----|
| 1. General information .....                                            | 2   |
| 2. Synthesis of substrates .....                                        | 2   |
| 3. Pd-catalyzed alkynylcarbonylation of alkenes.....                    | 4   |
| 4. Synthetic applications .....                                         | 4   |
| 5. Mechanistic studies .....                                            | 6   |
| 6. Crystal structure of 4ab.....                                        | 9   |
| 7. Analytical data of all products.....                                 | 11  |
| 8. <sup>1</sup> H NMR and <sup>13</sup> C NMR Spectra for Products..... | 29  |
| 9. Density functional theory (DFT) calculations .....                   | 105 |
| 10. References .....                                                    | 160 |

## SUPPORTING INFORMATION

### 1. General information

Chemicals and solvents were purchased from commercial suppliers and used as received unless noted. Bromoalkynes and chloroalkynes were prepared according to literature procedures. All products were purified by flash chromatography on silica gel. All reactions were heated by metal sand bath (WATTCAS, LAB-500, <http://www.wattcas.com/>). The chemical yields referred are isolated products.  $^1\text{H}$  NMR and  $^{13}\text{C}$  NMR spectra were recorded on 400 MHz, 500MHz and 600MHz Bruker spectrometers. Chemical shifts of  $^1\text{H}$  were reported in part per million relative to the  $\text{CDCl}_3$  residual peak ( $\delta$  7.260). Chemical shifts of  $^{13}\text{C}$  NMR were reported relative to  $\text{CDCl}_3$  ( $\delta$  77.00). The used abbreviations are as follows: s (singlet), d (doublet), t (triplet), quart (quartet), quint (quintet), m (multiplet), br (broad). Structural assignments were made with additional information from NOE and HMBC experiments. Multiplets which arise from accidental equality of coupling constants of magnetically non-equivalent protons are marked as virtual (virt.). High resolution mass spectra (HRMS) data were measured on an ESI-microTOF II. The crystal data were collected by a diffractometer Rigaku Oxford Diffraction Supernova Dual Source, Cu at Zero equipped with an AtlasS2 CCD using Cu  $K\alpha$  radiation (1.54178 Å) by using a  $\omega$  scan mode. ICP-OES/MS were measured on a Agilent ICPMS 7700. Reactions were monitored by TLC analysis using silica gel 60 Å F-254 thin layer plates and compounds were visualized with a UV light at 254 nm or 365 nm.

### 2. Synthesis of substrates

#### 2.1 General methods for the synthesis of haloalkynes<sup>[1]</sup>

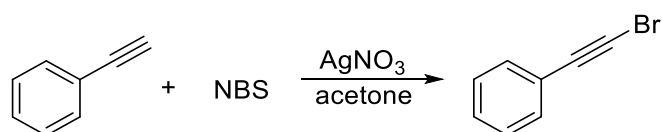

A mixture of phenylacetylene (2.0 mmol, 204 mg) was dissolved in acetone (15 mL), then NBS (427 mg, 2.4 mmol, 1.2 equiv), silver nitrate (20 mg, 0.12 mmol, 0.06 equiv.) was added successively in 25 mL round bottom flask. The Schlenk tube was then insert in metal sand bath at 30 °C stirring for 4h. Afterwards, filtered and concentrated under vacuum. The residue was purified by flash chromatography (petroleum ether) on silica gel to afford the corresponding (bromoethynyl)benzene as a pale yellow liquid (324 mg, 90% yield).

#### 2.2 General methods for the synthesis of alkenes

## SUPPORTING INFORMATION

### 2.2.1 Synthesis of (oct-7-en-1-yloxy)benzene<sup>[2]</sup>

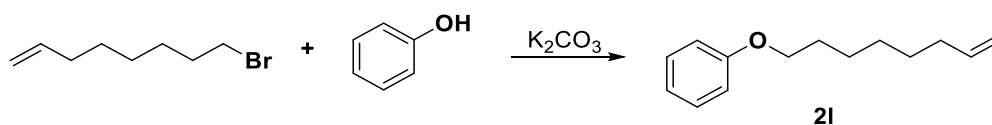

A mixture of 8-bromooct-1-ene (1.0 mmol, 190 mg) was dissolved in DMF (4 mL), then phenol (103 mg, 1.1 mmol, 1.1 equiv),  $K_2CO_3$  (424 mg, 3 mmol, 2 equiv.) under a  $N_2$  atmosphere were added to successively in 25 mL round bottom flask. The Schlenk tube was then insert in metal sand bath at 30 °C stirring for 12h. Afterwards, filtered and concentrated under vacuum. The residue was purified by flash chromatography (petroleum ether) on silica gel to afford the oct-7-en-1-yloxy benzene as a pale yellow liquid (184 mg, 90% yield).

### 2.2.2 Synthesis of pent-4-en-1-yl benzoate<sup>[3]</sup>

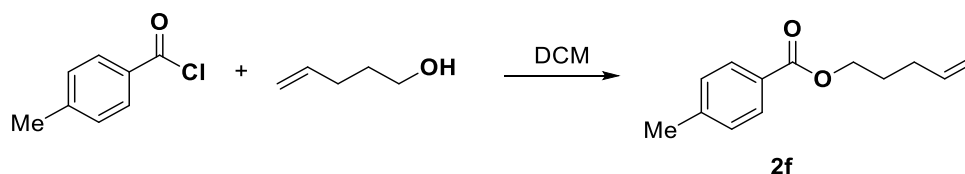

A mixture of 4-methylbenzoyl chloride (1.0 mmol, 154 mg) was dissolved in DCM (6 mL), then pent-4-en-1-ol (103 mg, 1.2 mmol, 1.2 equiv), was added successively in 25 mL round bottom flask. The Schlenk tube was then insert in metal sand bath at 40 °C stirring for 12h. Afterwards, filtered and concentrated under vacuum. The residue was purified by flash chromatography (petroleum ether) on silica gel to afford the corresponding pent-4-en-1-yl 4-methylbenzoate **2f** as a pale yellow liquid (173 mg, 85% yield).

### Scheme S1. Alkene substrates

#### Substrates of terminal alkenes

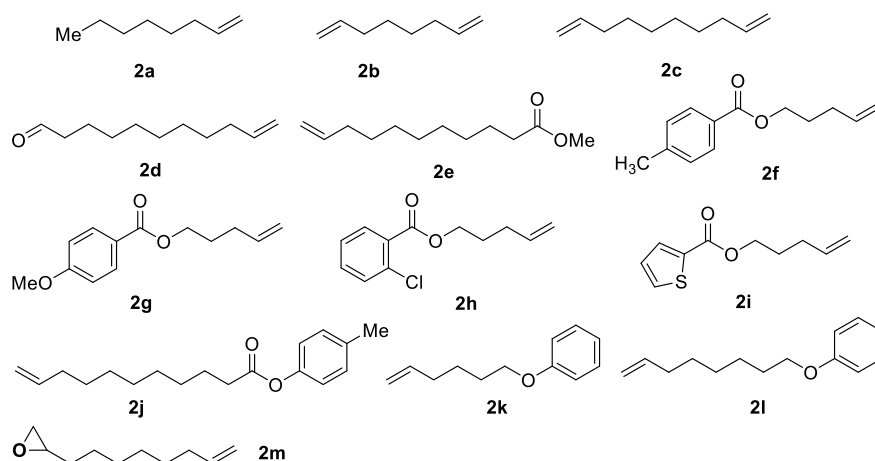

### 3. Pd-catalyzed alkynylcarbonylation of alkenes

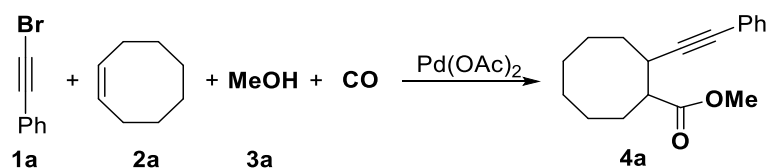

A mixture of Pd(OAc)<sub>2</sub> (5 mol%), (bromoethynyl)benzene (0.5 mmol, 90 mg) and cyclooctene (0.75 mmol, 83 mg), DPPE (5 mol%), CO (1 atm) and CH<sub>3</sub>OH (0.3 mL) was added successively in a 20 mL Schlenk tube. After stirring for 14h at 40 °C, then quenched with 30 mL of brine and extracted with ethyl acetate (3×20 mL). The combined organic layer was dried over Na<sub>2</sub>SO<sub>4</sub>, filtered and concentrated under vacuum. The residue was purified by flash chromatography (Hexane/EtOAc = 50:1, R<sub>f</sub> = 0.5) on silica gel, which furnished **4a** (104 mg, 77% yield) as a pale yellow oil.

### 4. Synthetic applications

#### 4.1. synthesis of 3-(phenylethynyl)bicyclo[2.2.1]heptane-2-carboxylic acid

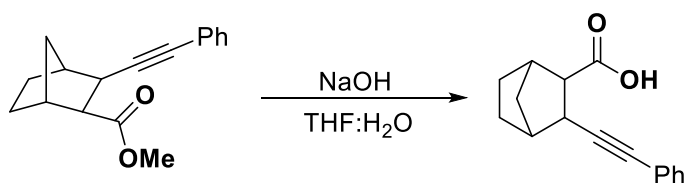

The methyl-3-(phenylethynyl)bicyclo[2.2.1]heptane-2-carboxylate (51 mg) was dissolved with THF/H<sub>2</sub>O (1:1, 2 mL), and NaOH (24 mg, 3.0 mmol, 3.0 equiv.) was added to the solution in sequence. The mixture was allowed to react at 80 °C for overnight. After that, the reaction was cooled down to room temperature, HCl (10%, 5 mL) was added to the mixture and extracted with ethyl acetate (3×10 mL). The combined organic phase was washed with brine (20.0 mL) and dried over Na<sub>2</sub>SO<sub>4</sub>. The residue was purified by flash chromatography (petroleum ether/EtOAc = 2:1, R<sub>f</sub> = 0.4) on silica gel, which furnished **7a** (28 mg, 58%).

**3-(phenylethynyl)bicyclo[2.2.1]heptane-2-carboxylic acid (7a):** <sup>1</sup>H NMR (400 MHz, CDCl<sub>3</sub>) δ 7.35 – 7.29 (m, 2H), 7.24 – 7.22 (m, 3H), 2.99 – 2.49 (m, 4H), 2.12 – 2.05 (m, 1H), 1.67 – 1.48 (m, 2H), 1.32 – 1.12 (m, 3H). <sup>13</sup>C NMR (100 MHz, CDCl<sub>3</sub>) δ 177.8, 131.5 (2C), 128.0 (2C), 127.6, 123.5, 89.7, 83.1, 52.0, 43.4, 38.9, 36.2, 28.6, 27.9. HRMS (ESI-TOF) m/z: [M+H]<sup>+</sup> calcd for C<sub>16</sub>H<sub>17</sub>O<sub>2</sub>, 241.1223, found: 241.1233.

#### 4.2. Synthesis of (3-(phenylethynyl)bicyclo[2.2.1]heptan-2-yl)methanol<sup>[4]</sup>

## SUPPORTING INFORMATION

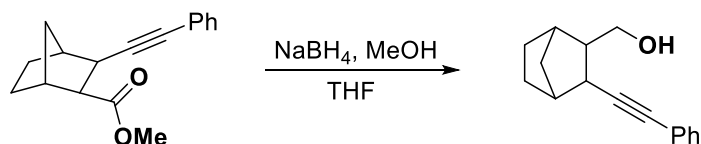

The methyl-3-(phenylethynyl)bicyclo[2.2.1]heptane-2-carboxylate was dissolved with THF (2 mL) and MeOH (1 mL) was added to the solution in sequence. The mixture was allowed to react at 70 °C for 2 hours. After that, the reaction was cooled down to room temperature, extracted with ethyl acetate (3×10 mL). The combined organic phase was washed with brine (20.0 mL) and dried over Na<sub>2</sub>SO<sub>4</sub>. The residue was purified by flash chromatography (petroleum ether/EtOAc = 10:1, R<sub>f</sub> = 0.4) on silica gel, which furnished **7b** (40 mg, 89%).

**(3-(phenylethynyl)bicyclo[2.2.1]heptan-2-yl)methanol (7b):** <sup>1</sup>H NMR (400 MHz, CDCl<sub>3</sub>) δ 7.37 – 7.26 (m, 5H), 3.81 – 3.65 (m, 3H), 2.46 (s, 1H), 2.11 (d, *J* = 3.1 Hz, 1H), 1.93 – 1.73 (m, 2H), 1.61 – 1.54 (m, 2H), 1.30 – 1.23 (m, 3H), 1.23 – 1.16 (m, 1H). <sup>13</sup>C NMR (100 MHz, CDCl<sub>3</sub>) δ 131.5 (2C), 128.2 (2C), 127.8, 123.3, 90.9, 82.6, 64.9, 48.7, 44.4, 38.7, 37.3, 34.7, 29.7, 28.2. HRMS (ESI-TOF) *m/z*: [M+H]<sup>+</sup> calcd for C<sub>16</sub>H<sub>19</sub>O, 227.1430, found: 227.1426.

### 4.3. Synthesis of 3-phenyl-4a,5,6,7,8,8a-hexahydro-1H-5,8-methanoisochromen-1-one<sup>[5]</sup>

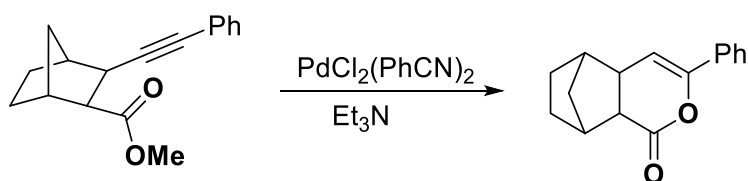

A mixture of 3-(phenylethynyl)bicyclo[2.2.1]heptane-2-carboxylic acid (0.2 mmol, 48 mg) and PdCl<sub>2</sub>(PhCN)<sub>2</sub> (0.14 mmol, 54 mg), and Et<sub>3</sub>N (0.43 mmol, 43 mg) in MeCN (2 mL) was refluxed for 5 h and concentrated. The residue was purified by flash chromatography (Petroleum ether/EtOAc = 5:1, R<sub>f</sub> = 0.4) on silica gel, which furnished **7c** (36 mg, 75%).

**3-phenyl-4a,5,6,7,8,8a-hexahydro-1H-5,8-methanoisochromen-1-one (7c):** <sup>1</sup>H NMR (400 MHz, CDCl<sub>3</sub>) δ 7.55 – 7.19 (m, 5H), 5.56 (s, 1H), 3.05 – 2.51 (m, 4H), 1.66 – 1.56 (m, 2H), 1.40 – 1.33 (m, 2H), 1.32 – 1.24 (m, 1H). <sup>13</sup>C NMR (100 MHz, CDCl<sub>3</sub>) δ 176.8, 152.4, 134.1, 128.4 (2C), 128.2 (2C), 126.6, 104.7, 47.4, 46.8, 44.7, 40.7, 33.9, 28.0, 27.0. HRMS (ESI-TOF) *m/z*: [M+H]<sup>+</sup> calcd for C<sub>16</sub>H<sub>17</sub>O<sub>2</sub>, 241.1223, found: 241.1219.

### 4.4. Synthesis of 4-iodo-3-(o-tolyl)-4a,5,6,7,8,8a-hexahydro-1H-5,8-methanoisochromen-1-one<sup>[6]</sup>

## SUPPORTING INFORMATION

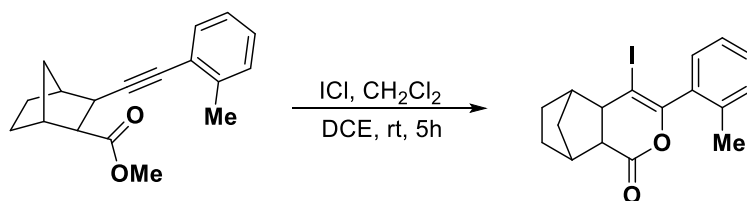

Under N<sub>2</sub> atmosphere condition, a mixture of methyl-3-(o-tolyethynyl)bicyclo[2.2.1]heptane-2-carboxylate (0.5 mmol, 134 mg) and ICl (0.6 mmol, 1.0mol/L in dichloromethane) and the mixture was stirred in the dark at room temperature until completion of the reaction. It was then poured into a 10 % aqueous NaHCO<sub>3</sub> solution (10 mL) and extracted with CH<sub>2</sub>Cl<sub>2</sub> (2×20 mL). The organic extract was washed with a 10% aqueous Na<sub>2</sub>S<sub>2</sub>O<sub>3</sub> solution (10 mL) and brine (10 mL), dried over Na<sub>2</sub>SO<sub>4</sub>. The residue was purified by flash chromatography (Petroleum ether/EtOAc = 10:1, R<sub>f</sub> = 0.4) on silica gel, which furnished **7d** (123.5 mg, 65%).

**4-iodo-3-(o-tolyl)-4a,5,6,7,8,8a-hexahydro-1H-5,8-methanoisochromen-1-one (7d):** <sup>1</sup>H NMR (500 MHz, CDCl<sub>3</sub>) δ 7.33 – 7.22 (m, 4H), 3.02 – 2.76 (m, 4H), 2.33 (s, 3H), 1.79 – 1.63 (m, 3H), 1.56 – 1.47 (m, 1H), 1.46 – 1.32 (m, 2H). <sup>13</sup>C NMR (100 MHz, CDCl<sub>3</sub>) δ 198.2, 178.7, 140.1, 133.6, 132.6, 132.5, 128.8, 125.9, 84.1, 48.1, 45.7, 42.5, 40.9, 33.9, 27.6, 27.5, 21.4. HRMS (ESI-TOF) m/z: [M+H]<sup>+</sup> calcd for C<sub>17</sub>H<sub>18</sub>IO<sub>2</sub>, 381.0346, found: 381.0337.

## 5. Mechanistic studies

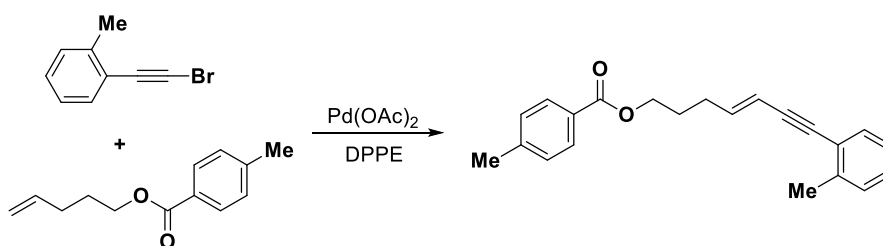

A mixture of Pd(OAc)<sub>2</sub> (5 mol%), 1-(bromoethynyl)-2-methylbenzene (0.5 mmol, 98 mg) and pent-4-en-1-yl 4-methylbenzoate (0.75 mmol, 153 mg), DPPE (5 mol%) and CH<sub>3</sub>OH (2 mL) was added successively in a 20 mL Schlenk tube. After stirring for 14 h at 40 °C, then quenched with 30 mL of brine and extracted with ethyl acetate (3×30 mL). The combined organic layer was dried over Na<sub>2</sub>SO<sub>4</sub>, filtered and concentrated under vacuum. The residue was purified by flash chromatography (Hexane /EtOAc = 50:1, R<sub>f</sub> = 0.5) on silica gel, which furnished **8a** (116 mg, 73%) as a pale yellow oil.

**7-(o-tolyl)hept-4-en-6-yn-1-yl 4-methylbenzoate (8a):** Yellow liquid (116 mg, 73% yield), R<sub>f</sub> = 0.5 (Hexane/EtOAc = 50:1); <sup>1</sup>H NMR (500 MHz, CDCl<sub>3</sub>) δ 7.94 – 7.33 (m, 3H), 7.26 – 7.10 (m, 5H),

## SUPPORTING INFORMATION

5.46 – 4.38 (m, 4H), 2.48 – 2.10 (m, 10H).  $^{13}\text{C}$  NMR (125 MHz,  $\text{CDCl}_3$ )  $\delta$  166.6, 143.5, 140.0, 131.8, (2C) 130.6 (2C), 129.5, 129.4, 129.0, 128.2, 125.5, 121.6, 93.2, 88.5, 63.8, 33.9, 27.3, 21.6, 20.7. HRMS (ESI-TOF)  $m/z$ :  $[\text{M}+\text{H}]^+$  calcd for  $\text{C}_{22}\text{H}_{23}\text{O}_2$ , 319.1693, found: 319.1689.

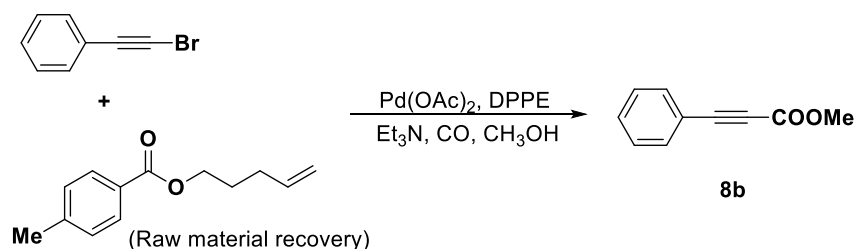

A mixture of  $\text{Pd}(\text{OAc})_2$  (5 mol%), (bromoethynyl)benzene (0.5 mmol, 90 mg) and pent-4-en-1-yl 4-methylbenzoate (0.75 mmol, 153 mg), DPPE (5 mol%), CO (1 atm),  $\text{Et}_3\text{N}$  (1 mL) and  $\text{CH}_3\text{OH}$  (1 mL) was added successively in a 20 mL Schlenk tube. After stirring for 14 h at 40 °C, then quenched with 30 mL of brine and extracted with ethyl acetate ( $3 \times 30$  mL). The combined organic layer was dried over  $\text{Na}_2\text{SO}_4$ , filtered and concentrated under vacuum. The residue was purified by flash chromatography (Hexane /EtOAc = 50:1,  $R_f$  = 0.5) on silica gel, which furnished **8b** (74 g, 92%) as a pale yellow oil.

**methyl 3-phenylpropiolate (8b):**<sup>[7]</sup> Yellow liquid (74 mg, 92% yield),  $R_f$  = 0.5 (Hexane/EtOAc = 50:1);  $^1\text{H}$  NMR (500 MHz,  $\text{CDCl}_3$ )  $\delta$  7.61 – 7.56 (m, 2H), 7.49 – 7.42 (m, 1H), 7.41 – 7.34 (m, 2H), 3.84 (s, 3H).  $^{13}\text{C}$  NMR (125 MHz,  $\text{CDCl}_3$ )  $\delta$  154.4, 132.9 (2C), 130.6, 128.5 (2C), 119.5, 86.4, 80.3, 52.79.

### The influence of CO pressure

1-(bromoethynyl)-2-methylbenzene (97 mg, 0.5 mmol),  $\text{Pd}(\text{OAc})_2$  (5 mol%), bicyclo[2.2.1]hept-2-ene (71 mg, 0.75 mmol), DPPE (5 mol%) and  $\text{CH}_3\text{OH}$  (0.3 mL) and a stirring bar were added into a vial (5 mL). Then, the vial was then transferred into an autoclave (50 mL). At 40 °C, the autoclave was flushed with CO gas three times and pressurized with CO gas to 2 atm, 10 atm, 20 atm, 30 atm, 40 atm, 50 atm. After 14 h, the CO gas was released, and then quenched with 30 mL of brine and extracted with ethyl acetate ( $3 \times 30$  mL). The combined organic layer was dried over  $\text{Na}_2\text{SO}_4$ , filtered and concentrated under vacuum. The residue was purified by flash chromatography (Hexane/EtOAc = 50:1,  $R_f$  = 0.5) on silica gel, which furnished **4ax** as a pale yellow oil. The results was summarized in Scheme S2.

## SUPPORTING INFORMATION

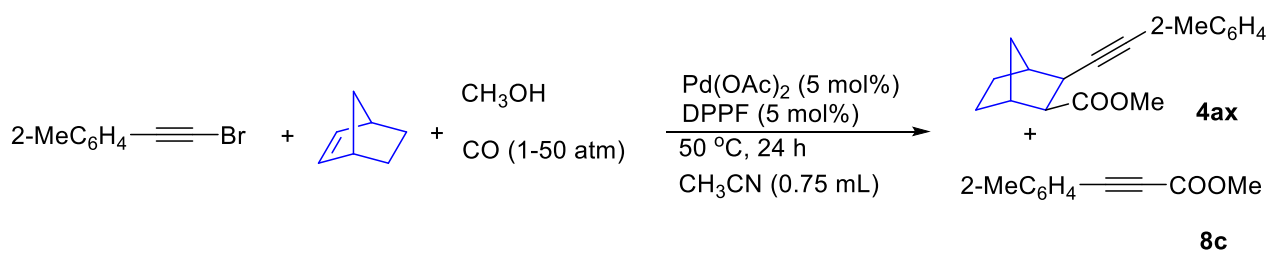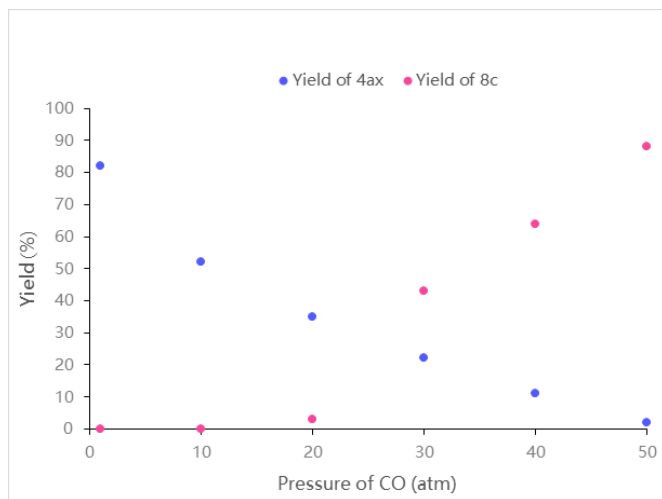

**Scheme S2.** The influence of CO pressure.



## SUPPORTING INFORMATION

### 6. Crystal structure of **4ab**

**Experimental:** Single crystals of  $C_{25}H_{21}O_2$  (Methyl-3-((4-(phenylethynyl)phenyl)ethynyl)bicyclo[2.2.1]heptane-2-carboxylate **4ab**) were generated in the mixed solution of dichloromethane and n-hexane. A suitable crystal was selected and analyzed it on a SuperNova, Dual, Cu at zero, AtlasS2 diffractometer. The crystal was kept at 149.99(10) K during data collection. The X-ray crystallographic structures for **4ab**. ORTEP representation with 50% probability thermal ellipsoids. Crystal data have been deposited to CCDC, number 2094034.

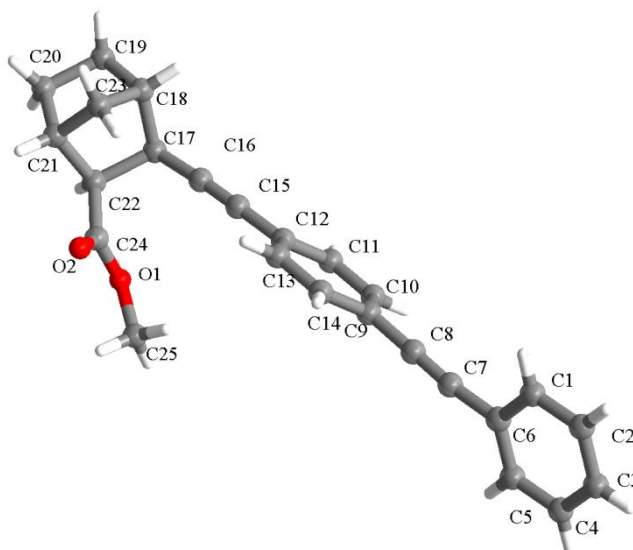

**Figure S1.** X-ray crystallographic structures of **4ab** with thermal ellipsoids at 50% probability.

## SUPPORTING INFORMATION

**Table S1. Crystal Structure of 4ab**

| Identification code               | <b>4ab</b>                                                                        |
|-----------------------------------|-----------------------------------------------------------------------------------|
| Empirical formula                 | C <sub>25</sub> H <sub>22</sub> O <sub>2</sub>                                    |
| Formula weight                    | 354.43                                                                            |
| Temperature                       | 273 K                                                                             |
| Wavelength                        | 1.54178 Å                                                                         |
| Crystal system                    | Orthorhombic                                                                      |
| Space group                       | Pna2 <sub>1</sub>                                                                 |
| Unit cell dimensions              | a = 7.2816(11) Å a = 90 °<br>b = 42.358(6) Å b = 90 °<br>c = 6.3202(9) Å g = 90 ° |
| Volume                            | 1949.4(5) Å <sup>3</sup>                                                          |
| Z                                 | 4                                                                                 |
| Density (calculated)              | 1.208 Mg/m <sup>3</sup>                                                           |
| Absorption coefficient            | 0.589 mm <sup>-1</sup>                                                            |
| F(000)                            | 752                                                                               |
| Crystal size                      | 0.120 x 0.100 x 0.080 mm <sup>3</sup>                                             |
| Theta range for data collection   | 4.175 to 68.524 °                                                                 |
| Index ranges                      | -8 ≤ h ≤ 7, -48 ≤ k ≤ 51, -7 ≤ l ≤ 6                                              |
| Reflections collected             | 14015                                                                             |
| Independent reflections           | 3324 [R(int) = 0.1289]                                                            |
| Completeness to theta = 24.980 °  | 99.8 %                                                                            |
| Absorption correction             | None                                                                              |
| Refinement method                 | Full-matrix least-squares on F <sup>2</sup>                                       |
| Data / restraints / parameters    | 3324 / 15 / 222                                                                   |
| Goodness-of-fit on F <sup>2</sup> | 0.959                                                                             |
| Final R indices [I > 2σ(I)]       | R1 = 0.1005, wR2 = 0.2502                                                         |
| R indices (all data)              | R1 = 0.1599, wR2 = 0.2979                                                         |
| Absolute structure parameter      | -0.3(5)                                                                           |
| Extinction coefficient            | 0.023(4)                                                                          |
| Largest diff. peak and hole       | 0.409 and -0.269 e.Å <sup>-3</sup>                                                |

## SUPPORTING INFORMATION

### 7. Analytical data of all products

#### Pent-4-en-1-yl 4-methylbenzoate (2f)<sup>[3]</sup>

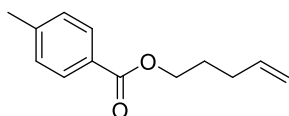

Yellow liquid (173 mg, 85% yield),  $R_f = 0.5$  (Hexane/EtOAc = 50:1);  $^1\text{H}$

NMR (500 MHz,  $\text{CDCl}_3$ )  $\delta$  7.97 – 7.91 (m, 2H), 7.23 (s, 2H), 5.85 – 4.32 (m, 5H), 2.40 (s, 3H), 2.26 – 2.18 (m, 2H), 1.90 – 1.82 (m, 2H);  $^{13}\text{C}$  NMR (125 MHz,  $\text{CDCl}_3$ )  $\delta$  166.6, 143.4, 137.5, 129.5, 129.0 (2C), 127.7 (2C), 115.3, 64.1, 30.2, 27.9, 21.6.

#### Pent-4-en-1-yl 2-chlorobenzoate (2h)<sup>[15]</sup>

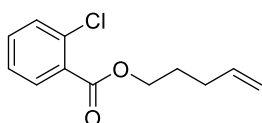

Yellow liquid (186 mg, 83% yield),  $R_f = 0.5$  (Hexane/EtOAc = 50:1);  $^1\text{H}$

NMR (400 MHz,  $\text{CDCl}_3$ )  $\delta$  7.81 – 7.31 (m, 4H), 5.84 – 4.35 (m, 5H), 2.27 – 2.18 (m, 2H), 1.93 – 1.82 (m, 2H);  $^{13}\text{C}$  NMR (100 MHz,  $\text{CDCl}_3$ )  $\delta$  165.7, 137.3, 133.5, 132.3, 131.2, 130.9, 130.4, 126.51 115.4, 64.9, 30.0, 27.7.

#### Hex-5-en-1-yloxy)benzene (2k)<sup>[16]</sup>

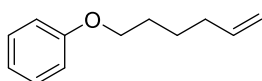

Yellow liquid (151 mg, 86% yield),  $R_f = 0.5$  (Hexane/EtOAc = 50:1);  $^1\text{H}$

NMR (500 MHz,  $\text{CDCl}_3$ )  $\delta$  7.31 – 7.19 (m, 2H), 7.07 – 6.75 (m, 3H), 5.84 – 4.95 (m, 3H), 3.95 (s, 2H), 2.13 – 1.81 (m, 4H), 1.63 – 1.53 (m, 2H);  $^{13}\text{C}$  NMR (125 MHz,  $\text{CDCl}_3$ )  $\delta$  159.0, 138.5, 129.3 (2C), 120.4, 114.5, 114.4 (2C), 67.6, 33.4, 28.7, 25.3.

#### Oct-7-en-1-yloxy)benzene (2l)<sup>[2]</sup>

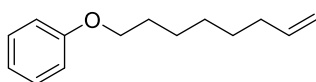

Pale yellow liquid (184 mg, 90% yield),  $R_f = 0.5$  (Hexane/EtOAc = 50:1);

$^1\text{H}$  NMR (500 MHz,  $\text{CDCl}_3$ )  $\delta$  7.32 – 7.28 (m, 2H), 7.01 – 6.92 (m, 3H), 5.87 (m, 1H), 5.10 – 4.97 (m, 2H), 3.99 – 2.12 (m, 4H), 1.94 – 1.78 (m, 2H), 1.57 – 1.34 (m, 6H);  $^{13}\text{C}$  NMR (125 MHz,  $\text{CDCl}_3$ )  $\delta$  159.0, 138.9, 129.3 (2C), 120.4, 114.4, 114.2 (2C), 67.7, 33.6, 29.2, 28.8, 28.1, 25.8.

#### 1-(Bromoethynyl)-4-methylbenzene<sup>[17]</sup>

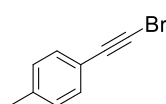

Yellow liquid (91 mg, 95% yield),  $R_f = 0.8$  (Hexane/EtOAc = 100:1);  $^1\text{H}$  NMR (500

MHz,  $\text{CDCl}_3$ )  $\delta$  7.38 – 7.34 (m, 2H), 7.22 – 7.08 (m, 2H), 2.36 (s, 3H).  $^{13}\text{C}$  NMR (125 MHz,  $\text{CDCl}_3$ )  $\delta$  138.8, 131.8 (2C), 129.0 (2C), 119.5, 80.1, 48.7, 21.4.

#### 1-(Bromoethynyl)-4-chlorobenzene<sup>[18]</sup>

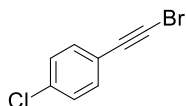

Yellow liquid (106 mg, 99% yield),  $R_f = 0.8$  (Hexane/EtOAc = 100:1);  $^1\text{H}$  NMR

(500 MHz,  $\text{CDCl}_3$ )  $\delta$  7.40 – 7.25 (m, 4H).  $^{13}\text{C}$  NMR (125 MHz,  $\text{CDCl}_3$ )  $\delta$  134.7,

## SUPPORTING INFORMATION

133.1 (2C), 128.6 (2C), 121.1, 78.9, 51.0.

### 1-Bromo-3-(bromoethynyl)benzene<sup>[17]</sup>

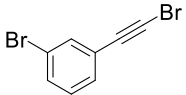 Yellow liquid (125 mg, 98% yield),  $R_f = 0.8$  (Hexane/EtOAc = 100:1);  $^1\text{H NMR}$  (500 MHz,  $\text{CDCl}_3$ )  $\delta$  7.62 – 7.59 (m, 1H), 7.48 – 7.44 (m, 1H), 7.39 – 7.34 (m, 1H), 7.17 (m, 1H).  $^{13}\text{C NMR}$  (125 MHz,  $\text{CDCl}_3$ )  $\delta$  134.7, 131.8, 130.5, 129.7, 124.5, 122.0, 78.5, 51.6.

### 2-(Bromoethynyl)naphthalene<sup>[17]</sup>

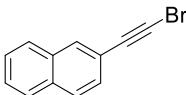 Yellow solid (111 mg, 97% yield),  $R_f = 0.8$  (Hexane/EtOAc = 100:1);  $^1\text{H NMR}$  (500 MHz,  $\text{CDCl}_3$ )  $\delta$  7.99 – 7.80 (m, 4H), 7.58 – 7.46 (m, 3H).  $^{13}\text{C NMR}$  (125 MHz,  $\text{CDCl}_3$ )  $\delta$  132.9, 132.8, 132.1, 128.4, 128.0, 127.8, 127.7, 126.9, 126.6, 119.9, 80.4, 50.0.

### Methyl 3-(bromoethynyl)-4-methylbenzoate

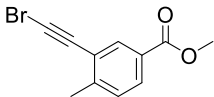 Yellow liquid (124 mg, 99% yield),  $R_f = 0.5$  (Hexane/EtOAc = 100:1);  $^1\text{H NMR}$  (500 MHz,  $\text{CDCl}_3$ )  $\delta$  8.09 – 8.07 (m, 1H), 7.29 – 7.24 (m, 2H), 3.90 (s, 3H), 2.48 (s, 3H).  $^{13}\text{C NMR}$  (125 MHz,  $\text{CDCl}_3$ )  $\delta$  166.3, 146.0, 133.6, 129.5, 127.8, 122.8, 78.1, 54.0, 52.1, 20.8. HRMS (ESI-TOF)  $m/z$ :  $[\text{M}+\text{H}]^+$  calcd for  $\text{C}_{11}\text{H}_{10}\text{BrO}_2$ , 252.9859, found: 252.9860.

### Methyl 2-(phenylethynyl)cyclooctane-1-carboxylate (4a)

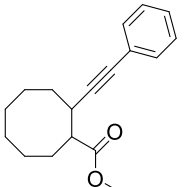 Yellow liquid (103 mg, 76% yield),  $R_f = 0.5$  (Hexane/EtOAc = 50:1);  $^1\text{H NMR}$  (500 MHz,  $\text{CDCl}_3$ )  $\delta$  7.37 – 7.20 (m, 5H), 3.71 (s, 3H), 3.35 – 2.81 (m, 2H), 2.08 – 1.98 (m, 3H), 1.87 – 1.67 (m, 2H), 1.63 – 1.48 (m, 7H).  $^{13}\text{C NMR}$  (100 MHz,  $\text{CDCl}_3$ )  $\delta$  175.4, 131.6 (2C), 128.0 (2C), 127.5, 123.7, 90.7, 82.7, 51.8, 45.3, 33.3, 31.3, 27.7, 26.2, 25.3, 25.1, 24.3. HRMS (ESI-TOF)  $m/z$ :  $[\text{M}+\text{H}]^+$  calcd for  $\text{C}_{18}\text{H}_{23}\text{O}_2$ , 271.1693, found: 271.1689.

### methyl 2-(p-tolyethynyl)cyclooctane-1-carboxylate (4b)

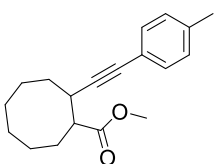 Yellow liquid (72 mg, 51% yield),  $R_f = 0.6$  (Hexane/EtOAc = 10:1);  $^1\text{H NMR}$  (500 MHz,  $\text{CDCl}_3$ )  $\delta$  7.29 – 7.24 (m, 2H), 7.07 – 7.04 (m, 2H), 3.34 – 3.29 (m, 1H), 3.71 (s, 3H), 2.80 – 2.74 (m, 1H), 2.32 (s, 3H), 2.12 – 1.89 (m, 1H), 1.87 – 1.72 (m, 3H), 1.63 – 1.49 (m, 8H).  $^{13}\text{C NMR}$  (125 MHz,  $\text{CDCl}_3$ )  $\delta$  175.5, 137.5, 131.4 (2C), 128.8 (2C), 120.6, 89.9, 82.7, 51.8, 45.3, 33.3, 31.3, 27.7, 26.2, 25.3, 25.1, 24.3, 21.3. HRMS (ESI-TOF)  $m/z$ :  $[\text{M}+\text{H}]^+$  calcd for  $\text{C}_{19}\text{H}_{25}\text{O}_2$ , 285.1849, found: 258.1855.

### Methyl 2-((4-(tert-butyl)phenyl)ethynyl)cyclooctane-1-carboxylate (4c)

## SUPPORTING INFORMATION

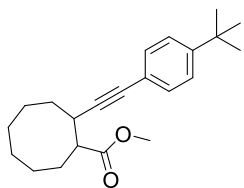

Yellow liquid (89 mg, 55% yield),  $R_f = 0.5$  (Hexane/EtOAc=50:1);  $^1\text{H}$  NMR (500 MHz,  $\text{CDCl}_3$ )  $\delta$  7.34 – 7.24 (m, 4H), 3.71 (s, 3H), 3.34 – 2.80 (m, 2H), 2.11 – 2.03 (m, 1H), 2.02 – 1.93 (m, 2H), 1.85 – 1.71 (m, 2H), 1.64 – 1.48 (m, 7H), 1.34 – 1.29 (m, 9H).  $^{13}\text{C}$  NMR (125 MHz,  $\text{CDCl}_3$ )  $\delta$  175.5, 150.7, 131.3 (2C), 125.0 (2C), 120.7, 89.9, 82.7, 51.8, 45.4, 34.6, 33.3, 31.3, 31.1 (3C), 27.7, 26.2, 25.3, 25.1, 24.3. HRMS (ESI-TOF)  $m/z$ :  $[\text{M}+\text{H}]^+$  calcd for  $\text{C}_{22}\text{H}_{31}\text{O}_2$ , 327.2319, found: 327.2324.

### Methyl 2-((4-propylphenyl)ethynyl)cyclooctane-1-carboxylate (4d)

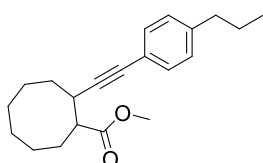

Yellow liquid (90 mg, 58% yield),  $R_f = 0.5$  (Hexane/EtOAc = 50:1);  $^1\text{H}$  NMR (500 MHz,  $\text{CDCl}_3$ )  $\delta$  7.31 – 7.26 (m, 2H), 7.07 – 6.80 (m, 2H), 3.71 (s, 3H), 3.34 – 2.80 (m, 2H), 2.55 – 2.07 (m, 3H), 2.02 – 1.89 (m, 3H), 1.86 – 1.71 (m, 2H), 1.47 – 1.64 (m, 7H), 1.35 – 1.27 (m, 1H), 0.91 – 0.87 (m, 3H).  $^{13}\text{C}$  NMR (125 MHz,  $\text{CDCl}_3$ )  $\delta$  175.5, 142.4, 131.5 (2C), 128.3 (2C), 120.9, 89.9, 82.8, 51.9, 45.4, 37.9, 33.4, 31.4, 27.8, 26.2, 25.4, 25.1, 24.4, 24.3, 13.7. HRMS (ESI-TOF)  $m/z$ :  $[\text{M}+\text{H}]^+$  calcd for  $\text{C}_{21}\text{H}_{29}\text{O}_2$ , 313.2162, found: 313.2162.

### methyl 2-((4-methoxyphenyl)ethynyl)cyclooctane-1-carboxylate (4e)

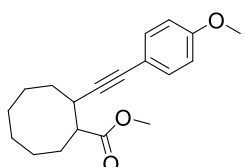

Yellow liquid (56 mg, 37% yield),  $R_f = 0.4$  (Hexane/EtOAc = 10:1)  $^1\text{H}$  NMR (500 MHz,  $\text{CDCl}_3$ )  $\delta$  7.34 – 7.22 (m, 2H), 6.89 – 6.79 (m, 2H), 3.85 (s, 3H), 3.71 (s, 3H), 3.41 – 2.81 (m, 2H), 2.13 – 1.91 (m, 4H), 1.90 – 1.74 (m, 2H), 1.64 – 1.48 (m, 6H).  $^{13}\text{C}$  NMR (125 MHz,  $\text{CDCl}_3$ )  $\delta$  175.4, 159.9, 133.6 (2C), 113.0, 110.7 (2C), 94.9, 78.8, 55.7, 51.8, 45.5, 33.5, 31.4, 27.7, 26.2, 25.4, 25.2, 24.3. HRMS (ESI-TOF)  $m/z$ :  $[\text{M}+\text{H}]^+$  calcd for  $\text{C}_{19}\text{H}_{25}\text{O}_3$ , 301.1798, found: 301.1789.

### Methyl 2-((4-fluorophenyl)ethynyl)cyclooctane-1-carboxylate (4f)

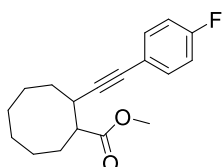

Yellow liquid (80 mg, 56% yield),  $R_f = 0.5$  (Hexane/EtOAc = 50:1);  $^1\text{H}$  NMR (500 MHz,  $\text{CDCl}_3$ )  $\delta$  7.38 – 7.31 (m, 2H), 6.99 – 6.91 (m, 2H), 3.71 (s, 3H), 3.33 – 2.07 (m, 3H), 1.98 – 1.92 (m, 3H), 1.86 – 1.67 (m, 2H), 1.60 – 1.49 (m, 6H).  $^{13}\text{C}$  NMR (125 MHz,  $\text{CDCl}_3$ )  $\delta$  175.5, 162.1 (d,  $J = 246.8$  Hz, 1C), 133.4 (d,  $J = 8.1$  Hz, 2C), 119.8 (d,  $J = 4.6$  Hz, 1C), 115.3 (d,  $J = 21.9$  Hz, 2C), 90.4, 81.6, 51.9, 45.2, 33.3, 31.3, 27.8, 26.2, 25.2, 24.3. HRMS (ESI-TOF)  $m/z$ :  $[\text{M}+\text{H}]^+$  calcd for  $\text{C}_{18}\text{H}_{22}\text{FO}_2$ , 289.1598, found: 289.1598.

### methyl 2-((2-fluorophenyl)ethynyl)cyclooctane-1-carboxylate (4g)

## SUPPORTING INFORMATION

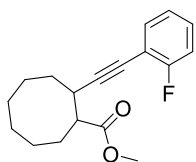

Yellow liquid (119 mg, 83% yield),  $R_f = 0.5$  (Hexane/EtOAc = 50:1);  $^1\text{H NMR}$  (400 MHz,  $\text{CDCl}_3$ )  $\delta$  7.69 – 6.80 (m, 4H), 3.63 (s, 3H), 2.95 – 2.42 (m, 2H), 1.98 – 1.08 (m, 12H).  $^{13}\text{C NMR}$  (100 MHz,  $\text{CDCl}_3$ )  $\delta$  175.4, 162.8 (d,  $J = 249.1$  Hz, 1C), 133.6 (d,  $J = 1.1$  Hz, 1C), 129.2 (d,  $J = 7.7$  Hz, 1C), 123.7 (d,  $J = 3.8$  Hz, 1C), 115.2 (d,  $J = 21.0$  Hz, 1C), 96.3 (d,  $J = 3.4$  Hz, 1C), 76.0, 51.9, 45.4, 33.5, 31.3, 27.7, 26.2, 25.4, 25.2, 24.3. HRMS (ESI-TOF)  $m/z$ :  $[\text{M}+\text{H}]^+$  calcd for  $\text{C}_{18}\text{H}_{22}\text{FO}_2$ , 289.1598, found: 289.1591.

### Methyl 2-((4-chlorophenyl)ethynyl)cyclooctane-1-carboxylate (4h)

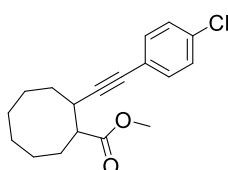

Yellow liquid (99 mg, 65% yield),  $R_f = 0.5$  (Hexane/EtOAc = 50:1);  $^1\text{H NMR}$  (500 MHz,  $\text{CDCl}_3$ )  $\delta$  7.30 – 7.28 (m, 2H), 7.26 – 7.20 (m, 2H), 3.71 (s, 3H), 3.33 – 2.07 (m, 3H), 1.97 – 1.92 (m, 3H), 1.78 – 1.51 (m, 8H).  $^{13}\text{C NMR}$  (125 MHz,  $\text{CDCl}_3$ )  $\delta$  175.4, 133.5, 132.8 (2C), 128.4 (2C), 122.2, 91.9, 81.6, 51.9, 45.2, 33.3, 31.2, 27.8, 26.2, 25.3, 25.2, 24.3. HRMS (ESI-TOF)  $m/z$ :  $[\text{M}+\text{H}]^+$  calcd for  $\text{C}_{18}\text{H}_{22}\text{ClO}_2$ , 305.1303, found: 305.1297.

### methyl 2-((2-chlorophenyl)ethynyl)cyclooctane-1-carboxylate (4i)

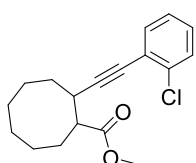

Yellow liquid (129 mg, 85% yield),  $R_f = 0.5$  (Hexane/EtOAc = 50:1);  $^1\text{H NMR}$  (500 MHz,  $\text{CDCl}_3$ )  $\delta$  7.30 – 7.28 (m, 2H), 7.26 – 7.20 (m, 2H), 3.71 (s, 3H), 3.33 – 2.07 (m, 3H), 1.97 – 1.92 (m, 3H), 1.78 (m, 2H), 1.63 – 1.51 (m, 6H).  $^{13}\text{C NMR}$  (125 MHz,  $\text{CDCl}_3$ )  $\delta$  175.4, 136.0, 133.5, 132.8, 128.8, 127.5, 124.2, 91.9, 81.6, 51.9, 45.2, 33.3, 31.2, 27.8, 26.2, 25.3, 25.2, 24.3. HRMS (ESI-TOF)  $m/z$ :  $[\text{M}+\text{H}]^+$  calcd for  $\text{C}_{18}\text{H}_{22}\text{ClO}_2$ , 305.1303, found: 305.1297.

### methyl 2-((3-bromophenyl)ethynyl)cyclooctane-1-carboxylate (4j)

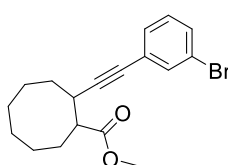

Yellow liquid (104 mg, 54% yield),  $R_f = 0.6$  (Hexane/EtOAc = 10:1);  $^1\text{H NMR}$  (500 MHz,  $\text{CDCl}_3$ )  $\delta$  7.51 – 7.39 (m, 2H), 7.29 – 7.13 (m, 2H), 3.71 (s, 3H), 3.34 – 2.07 (m, 3H), 1.93 – 1.92 (m, 5H), 1.58 – 1.48 (m, 6H).  $^{13}\text{C NMR}$  (125 MHz,  $\text{CDCl}_3$ )  $\delta$  175.3, 134.3, 130.7, 130.2, 125.7, 121.9, 92.3, 81.2, 51.9, 45.1, 33.3, 31.2, 27.7, 26.1, 25.3, 25.2, 24.2. HRMS (ESI-TOF)  $m/z$ :  $[\text{M}+\text{H}]^+$  calcd for  $\text{C}_{18}\text{H}_{22}\text{BrO}_2$ , 349.0798, found: 349.0791.

### methyl 2-((naphthalen-2-yl)ethynyl)cyclooctane-1-carboxylate (4k)

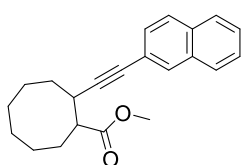

Yellow liquid (79 mg, 52% yield),  $R_f = 0.6$  (Hexane/EtOAc = 10:1);  $^1\text{H NMR}$  (500 MHz,  $\text{CDCl}_3$ )  $\delta$  7.29 – 7.24 (m, 4H), 7.18 – 7.05 (m, 3H), 3.71 (s, 3H), 3.34 – 2.80 (m, 2H), 2.32 (s, 1H), 2.07 – .96 (m, 4H), 1.86 – 1.71 (m, 3H), 1.55 – 1.32 (m, 4H).  $^{13}\text{C NMR}$  (125 MHz,  $\text{CDCl}_3$ )  $\delta$  175.5, 132.9, 132.5, 131.1, 128.7, 127.7, 127.6,

## SUPPORTING INFORMATION

127.5, 126.3, 126.2, 121.0, 89.9, 82.7, 51.8, 45.3, 33.4, 31.3, 27.7, 26.2, 25.3, 25.1, 24.3. HRMS (ESI-TOF)  $m/z$ :  $[M+H]^+$  calcd for  $C_{22}H_{25}O_2$ , 321.1849, found: 321.1856.

### Methyl 2-(phenylethynyl)cycloheptane-1-carboxylate (4l)

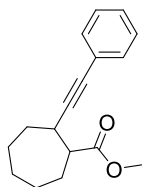

Yellow liquid (83 mg, 65% yield),  $R_f = 0.5$  (Hexane/EtOAc=50:1);  $^1H$  NMR (500 MHz,  $CDCl_3$ )  $\delta$  7.44 – 7.34 (m, 2H), 7.34 – 7.22 (m, 3H), 3.71 (s, 3H), 3.49 – 2.65 (m, 2H), 2.11 – 1.93 (m, 3H), 1.83 – 1.48 (m, 7H).  $^{13}C$  NMR (125 MHz,  $CDCl_3$ )  $\delta$  174.9, 131.5 (2C), 128.1 (2C), 127.5, 123.8, 90.1, 83.6, 51.7, 48.9, 33.5, 33.0, 27.3, 26.4, 25.8, 24.8.

HRMS (ESI-TOF)  $m/z$ :  $[M+H]^+$  calcd for  $C_{17}H_{21}O_2$ , 257.1536, found: 257.1533.

### methyl 2-(p-tolyethynyl)cycloheptane-1-carboxylate (4m)

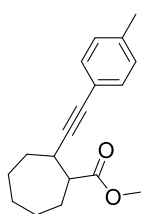

Yellow liquid (69 mg, 51 % yield),  $^1H$  NMR (500 MHz,  $CDCl_3$ )  $\delta$  7.30 – 7.20 (m, 2H), 7.14 – 7.08 (m, 2H), 3.70 (s, 3H), 3.47 – 2.64 (m, 2H), 2.32 (s, 3H), 2.11 – 1.90 (m, 3H), 1.82 (m, 3H), 1.70 – 1.58 (m, 3H), 1.55 – 1.41 (m, 1H).  $^{13}C$  NMR (125 MHz,  $CDCl_3$ )  $\delta$  175.0, 137.5, 131.4 (2C), 128.8 (2C), 120.7, 89.3, 83.6, 51.7, 48.9, 33.5, 33.0, 27.4,

26.4, 25.9, 24.8, 21.4. HRMS (ESI-TOF)  $m/z$ :  $[M+H]^+$  calcd for  $C_{18}H_{23}O_2$ , 271.1693, found: 271.1689.

### methyl 2-((4-ethylphenyl)ethynyl)cycloheptane-1-carboxylate (4n)

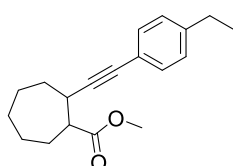

Yellow liquid (83 mg, 58% yield),  $R_f = 0.6$  (Hexane/EtOAc = 10:1);  $^1H$  NMR (500 MHz,  $CDCl_3$ )  $\delta$  7.33 – 7.28 (m, 2H), 7.24 – 7.10 (m, 2H), 3.70 (s, 3H), 3.47 – 2.56 (m, 4H), 2.04 – 1.93 (m, 2H), 1.79 – 1.61 (m, 7H), 1.54 – 1.41 (m,

1H), 1.21 (t,  $J = 7.6$  Hz, 3H).  $^{13}C$  NMR (125MHz,  $CDCl_3$ )  $\delta$  175.0, 143.9, 131.5 (2C), 127.6(2C), 120.9, 89.3, 83.6, 51.7, 48.9, 33.5, 33.0, 28.7, 27.3, 26.4, 25.8, 24.7, 15.4. HRMS (ESI-TOF)  $m/z$ :  $[M+H]^+$  calcd for  $C_{19}H_{25}O_2$ , 285.1849, found: 285.1843.

### Methyl 2-((4-(tert-butyl)phenyl)ethynyl)cycloheptane-1-carboxylate (4o)

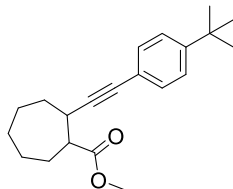

Yellow liquid (84 mg, 54% yield),  $R_f = 0.5$  (Hexane/EtOAc=50:1);  $^1H$  NMR (500 MHz,  $CDCl_3$ )  $\delta$  7.42 – 7.26 (m, 4H), 3.70 (s, 3H), 3.48 – 2.64 (m, 2H), 2.05 – 1.90 (m, 2H), 1.89 – 1.73 (m, 3H), 1.71 – 1.40 (m, 5H), 1.35 – 1.29 (m, 9H).  $^{13}C$  NMR (125 MHz,  $CDCl_3$ )  $\delta$  175.0, 150.7, 131.2 (2C), 125.1 (2C), 120.8,

89.3, 83.6, 50.3, 48.9, 34.6, 33.5, 33.0, 31.1 (3C), 27.3, 26.4, 25.8, 24.7. HRMS (ESI-TOF)  $m/z$ :  $[M+H]^+$  calcd for  $C_{21}H_{29}O_2$ , 313.2162, found: 313.2161.

### Methyl 2-((4-chlorophenyl)ethynyl)cycloheptane-1-carboxylate (4p)

## SUPPORTING INFORMATION

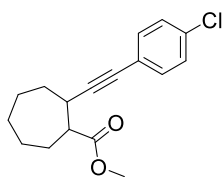

Yellow liquid (68 mg, 47% yield),  $R_f = 0.6$  (Hexane/EtOAc = 10:1);  $^1\text{H}$  NMR (500 MHz,  $\text{CDCl}_3$ )  $\delta$  7.34 – 7.28 (m, 2H), 7.28 – 7.21 (m, 2H), 3.70 (s, 3H), 3.47 – 2.65 (m, 2H), 2.10 – 1.89 (m, 5H), 1.62 – 1.49 (m, 5H).  $^{13}\text{C}$  NMR (125 MHz,  $\text{CDCl}_3$ )  $\delta$  174.9, 133.5, 132.8 (2C), 128.4 (2C), 122.2, 91.3, 82.5, 51.8, 48.7, 33.5, 32.9, 27.3, 26.4, 25.8, 24.8. HRMS (ESI-TOF)  $m/z$ :  $[\text{M}+\text{H}]^+$  calcd for  $\text{C}_{17}\text{H}_{20}\text{ClO}_2$ , 291.1146, found: 291.1142.

### Methyl 2-((4-fluorophenyl)ethynyl)cycloheptane-1-carboxylate (4q)

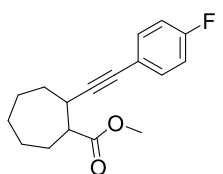

Yellow liquid (68.5 mg, 50% yield),  $R_f = 0.5$  (Hexane/EtOAc=50:1);  $^1\text{H}$  NMR (500 MHz,  $\text{CDCl}_3$ )  $\delta$  7.39 – 7.32 (m, 2H), 7.00 – 6.92 (m, 2H), 3.70 (s, 3H), 3.46 – 2.65 (m, 2H), 2.06 – 1.91 (m, 3H), 1.80 – 1.50 (m, 7H).  $^{13}\text{C}$  NMR (125 MHz,  $\text{CDCl}_3$ )  $\delta$  174.9, 162.1 (d,  $J = 308.6$  Hz, 1C), 133.3 (d,  $J = 10.3$  Hz, 2C), 131.0 (d,  $J = 10.3$  Hz, 1C), 119.8 (d,  $J = 3.5$  Hz, 1C), 115.3 (d,  $J = 27.4$  Hz, 2C), 89.8, 82.5, 51.8, 48.8, 33.5, 33.0, 27.4, 26.5, 25.9, 24.8. HRMS (ESI-TOF)  $m/z$ :  $[\text{M}+\text{H}]^+$  calcd for  $\text{C}_{17}\text{H}_{20}\text{FO}_2$ , 275.1442, found: 275.1436.

### methyl 2-(naphthalen-2-ylethynyl)cycloheptane-1-carboxylate (4r)

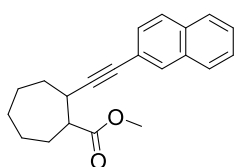

Yellow liquid (77 mg, 52% yield),  $R_f = 0.6$  (Hexane/EtOAc = 10:1);  $^1\text{H}$  NMR (500 MHz,  $\text{CDCl}_3$ )  $\delta$  7.81 – 7.71 (m, 4H), 7.56 – 7.41 (m, 3H), 3.73 (s, 3H), 3.54 – 2.69 (m, 2H), 2.09 – 1.99 (m, 2H), 1.94 – 1.76 (m, 3H), 1.75 – 1.47 (m, 5H).  $^{13}\text{C}$  NMR (125 MHz,  $\text{CDCl}_3$ )  $\delta$  175.0, 132.9, 132.5, 131.0, 128.7, 127.7, 127.6, 127.5, 126.3, 126.2, 121.1, 90.5, 83.9, 51.8, 48.9, 33.6, 33.1, 27.4, 26.5, 25.9, 24.8. HRMS (ESI-TOF)  $m/z$ :  $[\text{M}+\text{H}]^+$  calcd for  $\text{C}_{21}\text{H}_{23}\text{O}_2$ , 307.1693, found: 307.1688.

### Methyl-3-(phenylethynyl)bicyclo[2.2.1]heptane-2-carboxylate (4s)

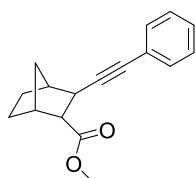

Yellow liquid (72 mg, 57% yield),  $R_f = 0.6$  (Hexane/EtOAc = 10:1);  $^1\text{H}$  NMR (400 MHz,  $\text{CDCl}_3$ )  $\delta$  7.21-7.35 (m, 2H), 7.23-7.27 (m, 3H), 3.65 (s, 3H), 2.97 – 2.67 (m, 3H), 2.59 (d,  $J = 3.7$  Hz, 1H), 2.47 – 2.10 (m, 3H), 1.67 – 1.22 (m, 3H).  $^{13}\text{C}$  NMR (100 MHz,  $\text{CDCl}_3$ )  $\delta$  173.3, 131.4 (2C), 128.1 (2C), 127.6, 123.5, 90.2, 82.6, 52.3, 51.4, 43.4, 39.0, 38.2, 36.3, 28.6, 28.0. HRMS (ESI-TOF)  $m/z$ :  $[\text{M}+\text{H}]^+$  calcd for  $\text{C}_{17}\text{H}_{19}\text{O}_2$ , 255.1380, found: 255.1387.

### Methyl-3-(p-tolyethynyl)bicyclo[2.2.1]heptane-2-carboxylate (4t)



## SUPPORTING INFORMATION

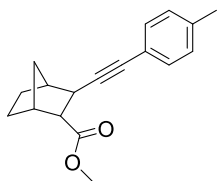

Yellow liquid (96 mg, 72% yield),  $R_f = 0.5$  (Hexane/EtOAc = 10:1);  $^1\text{H}$  NMR (500 MHz,  $\text{CDCl}_3$ )  $\delta$  7.22 – 7.06 (m, 4H), 3.65 (s, 3H), 2.95 – 2.67 (m 2H), 2.60 – 2.46 (m, 2H), 2.32 (s, 3H), 1.65 – 1.49 (m, 1 H), 1.33 – 1.15 (m, 5H).  $^{13}\text{C}$  NMR (125 MHz,  $\text{CDCl}_3$ )  $\delta$  173.3, 137.6, 131.3 (2C), 128.8 (2C), 120.4, 89.4, 82.6, 52.3, 51.4, 43.4, 39.0, 38.7, 36.2, 28.6, 27.9, 21.3. HRMS (ESI-TOF)  $m/z$ :  $[\text{M}+\text{H}]^+$  calcd for  $\text{C}_{18}\text{H}_{21}\text{O}_2$ , 269.1536, found: 269.1538.

### methyl-3-((2-chlorophenyl)ethynyl)bicyclo[2.2.1]heptane-2-carboxylate (4u)

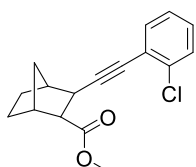

Yellow liquid (125 mg, 87% yield),  $R_f = 0.5$  (Hexane/EtOAc = 10:1);  $^1\text{H}$  NMR (500 MHz,  $\text{CDCl}_3$ )  $\delta$  7.48 – 7.31 (m, 4H), 3.65 (s, 3H), 3.26 – 2.67 (m, 3H), 2.60 – 2.56 (m, 1H), 2.46 – 2.32 (m, 3H), 1.65 – 1.33 (m, 3H).  $^{13}\text{C}$  NMR (125 MHz,  $\text{CDCl}_3$ )  $\delta$  171.9, 136.0, 133.6, 132.6, 128.8, 127.5, 123.7, 89.3, 81.7, 52.0, 51.7, 41.5, 39.1, 36.2, 33.2, 28.0, 27.1. HRMS (ESI-TOF)  $m/z$ :  $[\text{M}+\text{H}]^+$  calcd for  $\text{C}_{17}\text{H}_{18}\text{ClO}_2$ , 289.0990, found: 289.0983.

### methyl-3-((2-fluorophenyl)ethynyl)bicyclo[2.2.1]heptane-2-carboxylate (4v)

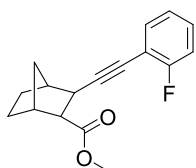

Yellow liquid (115 mg, 85% yield),  $R_f = 0.5$  (Hexane/EtOAc = 10:1);  $^1\text{H}$  NMR (400 MHz,  $\text{CDCl}_3$ )  $\delta$  7.56 (m, 1H), 7.46 (m, 1H), 7.22 (m, 2H), 3.65 (s, 3H), 3.26 (m, 1H), 2.67 (m, 2H), 2.60 – 2.56 (m, 1H), 2.46 (m, 1H), 2.32 (m, 2H), 1.65 – 1.49 (m, 1 H), 1.33 (m, 2H).  $^{13}\text{C}$  NMR (100 MHz,  $\text{CDCl}_3$ )  $\delta$  173.2, 162.3 (d,  $J = 248.8$  Hz, 1C), 133.6, 129.2 (d,  $J = 7.8$  Hz, 1C), 123.7 (d,  $J = 3.6$  Hz, 1C), 115.4 (d,  $J = 20.9$  Hz, 1C), 112.0 (d,  $J = 15.8$  Hz, 1C), 95.5 (d,  $J = 3.4$  Hz, 1C), 75.9, 52.2, 51.3 (d,  $J = 1.7$  Hz, 1C), 43.6, 39.2, 38.9, 36.3, 28.6, 28.0. HRMS (ESI-TOF)  $m/z$ :  $[\text{M}+\text{H}]^+$  calcd for  $\text{C}_{17}\text{H}_{18}\text{FO}_2$ , 273.1285, found: 273.1294.

### Methyl-3-((4-(trifluoromethyl)phenyl)ethynyl)bicyclo[2.2.1]heptane-2-carboxylate (4w)

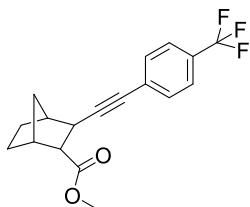

Yellow liquid (80 mg, 54% yield),  $R_f = 0.6$  (Hexane/EtOAc = 10:1);  $^1\text{H}$  NMR (500 MHz,  $\text{CDCl}_3$ )  $\delta$  7.60 – 7.34 (m, 4H), 3.62 (s, 3H), 3.02 (m, 1H), 2.71 – 2.47 (m, 3H), 2.10 – 1.59 (m, 4H), 1.36 – 1.16 (m, 2H).  $^{13}\text{C}$  NMR (125 MHz,  $\text{CDCl}_3$ )  $\delta$  173.1, 134.1 (2C), 131.2, 127.4 (2C), 125.7 (q,  $J = 10.1, 5.3$  Hz, 1C), 122.3 (q,  $J = 217.6, 110.6$  Hz, 1C), 96.3, 78.6, 52.1, 51.4, 43.5, 39.2, 38.9, 36.3, 28.7, 28.0. HRMS (ESI-TOF)  $m/z$ :  $[\text{M}+\text{H}]^+$  calcd for  $\text{C}_{18}\text{H}_{18}\text{F}_3\text{O}_2$ , 323.1253, found: 323.1247.6666

### Methyl-3-((3-nitrophenyl)ethynyl)bicyclo[2.2.1]heptane-2-carboxylate (4x)

## SUPPORTING INFORMATION

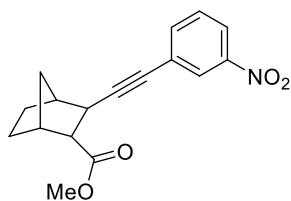

Yellow liquid (94 mg, 64% yield),  $R_f = 0.6$  (Hexane/EtOAc = 5:1)  $^1\text{H}$  NMR (400 MHz,  $\text{CDCl}_3$ )  $\delta$  8.26 – 8.02 (m, 2H), 7.63 – 7.44 (m, 2H), 3.66 (s, 3H), 2.98 – 2.08 (m, 5H), 1.70 – 1.50 (m, 2H), 1.37 (m, 1H), 1.32 – 1.14 (m, 2H);  $^{13}\text{C}$  NMR (100 MHz,  $\text{CDCl}_3$ )  $\delta$  173.1, 148.0, 137.2, 129.1, 126.2, 125.3, 122.4, 93.3, 80.4, 52.1, 51.4, 43.4, 39.7, 38.9, 36.3, 28.5, 28.0. HRMS (ESI-TOF)  $m/z$ :  $[\text{M}+\text{H}]^+$  calcd for  $\text{C}_{17}\text{H}_{18}\text{NO}_4$ , 300.1230, found: 300.1239.

### methyl (1R,2R,4S)-3-((2-cyanophenyl)ethynyl)bicyclo[2.2.1]heptane-2-carboxylate (4y)

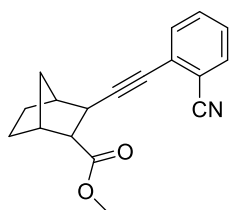

Yellow liquid (122 mg, 88% yield),  $R_f = 0.2$  (Hexane/EtOAc = 10:1);  $^1\text{H}$  NMR (400 MHz,  $\text{CDCl}_3$ )  $\delta$  7.59 – 7.33 (m, 4H), 3.66 (s, 3H), 3.05 – 2.58 (m, 4H), 2.17 – 2.10 (m, 1H), 1.63 – 1.55 (m, 2H), 1.44 – 1.34 (m, 1H), 1.34 – 1.16 (m, 2H).  $^{13}\text{C}$  NMR (100 MHz,  $\text{CDCl}_3$ )  $\delta$  173.1, 132.4, 132.42, 132.2, 127.8, 117.4, 115.0, 97.5, 78.9, 52.1, 51.4, 43.6, 39.1, 38.9, 36.4, 28.6, 27.9. HRMS (ESI-TOF)  $m/z$ :  $[\text{M}+\text{H}]^+$  calcd for  $\text{C}_{18}\text{H}_{18}\text{NO}_2$ , 280.1332, found: 280.1333.

### Methyl-3-((5-(methoxycarbonyl)-2-methylphenyl)ethynyl)bicyclo[2.2.1]heptane-2-carboxylate (4z)

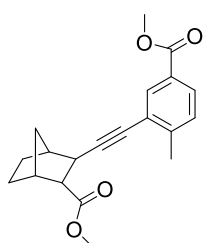

Yellow liquid (132 mg, 81% yield),  $R_f = 0.6$  (Hexane/EtOAc = 10:1);  $^1\text{H}$  NMR (500 MHz,  $\text{CDCl}_3$ )  $\delta$  7.97 – 7.81 (m, 2H), 7.28 – 7.20 (m, 1H), 3.88 (s, 3H), 3.61 (s, 3H), 3.03 – 2.48 (m, 4H), 2.42 (s, 3H), 2.26 – 1.55 (m, 3H), 1.36 – 1.25 (m, 3H).  $^{13}\text{C}$  NMR (125 MHz,  $\text{CDCl}_3$ )  $\delta$  173.2, 166.6, 145.3, 133.0, 130.9, 127.6, 121.3, 95.1, 80.5, 52.5, 52.0, 51.3, 43.7, 39.2, 38.2, 36.3, 28.6, 27.9, 20.9. HRMS (ESI-TOF)  $m/z$ :  $[\text{M}+\text{H}]^+$  calcd for  $\text{C}_{20}\text{H}_{23}\text{O}_4$ , 327.1591, found: 327.1583.

### Methyl-3-(cyclohex-1-en-1-ylethynyl)bicyclo[2.2.1]heptane-2-carboxylate (4aa)

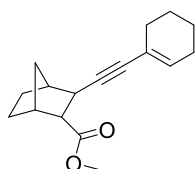

Yellow liquid (82 mg, 64% yield),  $R_f = 0.5$  (Hexane/EtOAc = 10:1);  $^1\text{H}$  NMR (500 MHz,  $\text{CDCl}_3$ )  $\delta$  5.98 – 5.94 (m, 1H), 3.66 (s, 3H), 2.85 – 2.35 (m, 4H), 2.05 – 1.98 (m, 5H), 1.62 – 1.45 (m, 6H), 1.28 – 1.26 (m, 1H), 1.22 – 1.11 (m, 2H).  $^{13}\text{C}$  NMR (125 MHz,  $\text{CDCl}_3$ )  $\delta$  173.3, 133.5, 120.6, 85.7, 84.4, 52.2, 51.2, 43.5, 38.9, 38.7, 36.1, 29.4, 28.6, 27.9, 25.5, 22.2, 21.5. HRMS (ESI-TOF)  $m/z$ :  $[\text{M}+\text{H}]^+$  calcd for  $\text{C}_{17}\text{H}_{23}\text{O}_2$ , 259.1693, found: 259.1688.

### Methyl-3-((4-(phenylethynyl)phenyl)ethynyl)bicyclo[2.2.1]heptane-2-carboxylate (4ab)

## SUPPORTING INFORMATION

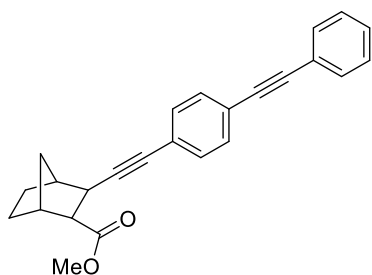

Yellow solid (103 mg, 58% yield),  $R_f = 0.6$  (Hexane/EtOAc = 10:1);  $^1\text{H NMR}$  (500 MHz,  $\text{CDCl}_3$ )  $\delta$  7.54 – 7.49 (m, 2H), 7.45 – 7.40 (m, 2H), 7.39 – 7.27 (m, 5H), 3.65 (s, 3H), 2.98 – 2.69 (m, 2H), 2.60 – 2.10 (m, 2H), 1.67 – 1.51 (m, 4H), 1.24 – 1.16 (m, 2H);  $^{13}\text{C NMR}$  (125 MHz,  $\text{CDCl}_3$ )  $\delta$  173.3, 131.6 (2C), 131.4 (2C), 131.4 (2C), 128.4, 128.3 (2C), 123.4, 123.0, 92.3, 89.1, 82.4, 52.3, 51.4, 43.4, 39.14 38.8, 36.3, 28.6, 28.0. HRMS (ESI-TOF)  $m/z$ :  $[\text{M}+\text{H}]^+$  calcd for  $\text{C}_{25}\text{H}_{23}\text{O}_2$ , 355.1693, found: 355.1684.

### 3-(*o*-tolylethynyl)decahydro-1,4:5,8-dimethanonaphthalene-2-carboxylate (4ac)

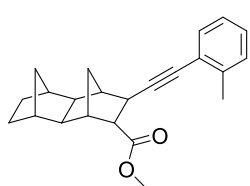

Yellow liquid (125 mg, 76% yield),  $R_f = 0.5$  (Hexane/EtOAc = 10:1);  $^1\text{H NMR}$  (500 MHz,  $\text{CDCl}_3$ )  $\delta$  7.30 – 7.28 (m, 1H), 7.19 – 7.13 (m, 2H), 7.08 – 7.05 (m, 1H), 3.60 (s, 3H), 3.38 – 3.07 (m, 2H), 2.63 – 2.59 (m, 1H), 2.48 – 2.36 (m, 1H), 2.37 (s, 3H), 2.23 (s, 1H), 2.13 – 1.78 (m, 4H), 1.52 – 1.41 (m, 4H), 1.07 – 1.00 (m, 3H).  $^{13}\text{C NMR}$  (125 MHz,  $\text{CDCl}_3$ )  $\delta$  173.6, 139.9, 131.8, 129.2, 127.6, 125.3, 123.3, 94.8, 81.2, 51.3, 49.7, 48.8, 48.4, 46.8, 43.2, 40.0, 36.2, 36.1, 34.9, 33.8, 31.2, 31.1, 20.6. HRMS (ESI-TOF)  $m/z$ :  $[\text{M}+\text{H}]^+$  calcd for  $\text{C}_{23}\text{H}_{27}\text{O}_2$ , 335.2006, found: 335.1998.

### methyl-5-((2-chlorophenyl)ethynyl)-3a,4,5,6,7,7a-hexahydro-1H-4,7-methanoindene-6-carboxylate (4ad-1);

### methyl-6-((2-chlorophenyl)ethynyl)-3a,4,5,6,7,7a-hexahydro-1H-4,7-methanoindene-5-carboxylate (4ad-2)

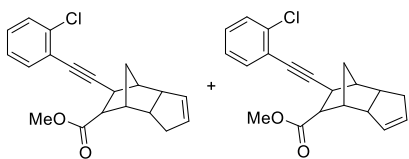

Yellow liquid (141.8 mg, 87% yield),  $R_f = 0.5$  (Hexane/EtOAc = 10:1);  $^1\text{H NMR}$  (400 MHz,  $\text{CDCl}_3$ )  $\delta$  7.39 – 7.31 (m, 4H), 7.16 (td,  $J = 6.9, 1.7$  Hz, 4H), 5.73 (td,  $J = 6.0, 2.1$  Hz, 2H), 5.62 (dd,  $J = 5.6, 2.2$  Hz, 1H), 5.50 (dd,  $J = 5.5, 2.3$  Hz, 1H), 3.63 (d,  $J = 4.4$  Hz, 6H), 3.19 – 3.07 (m, 4H), 2.85 (dd,  $J = 9.6, 1.7$  Hz, 1H), 2.70 – 2.56 (m, 5H), 2.52 (d,  $J = 4.3$  Hz, 1H), 2.45 (d,  $J = 4.5$  Hz, 1H), 2.38 – 2.21 (m, 5H), 2.14 – 2.06 (m, 1H), 1.65 – 1.56 (m, 2H).  $^{13}\text{C NMR}$  (100 MHz,  $\text{CDCl}_3$ )  $\delta$  173.6, 173.3, 135.6 (2C), 133.4, 133.3, 132.0, 131.8, 131.6, 131.5, 129.1 (2C), 128.6 (2C), 126.2 (2C), 123.4 (2C), 96.5, 96.3, 79.2, 79.0, 52.3, 52.0, 51.5, 51.4, 48.3, 47.5, 46.6, 44.9, 43.1, 41.8, 41.6, 41.4, 39.6, 39.1, 34.8, 32.2, 32.1 (2C). HRMS (ESI-TOF)  $m/z$ :  $[\text{M}+\text{H}]^+$  calcd for  $\text{C}_{20}\text{H}_{20}\text{ClO}_2$ , 327.1146, found: 327.1141.

### Trimethyl-6-(*o*-tolylethynyl)bicyclo[2.2.1]heptane-2,3,5-tricarboxylate (4ae)

## SUPPORTING INFORMATION

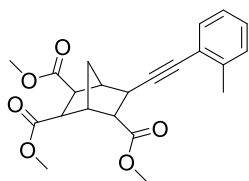

Yellow liquid (119 mg, 62% yield),  $R_f = 0.5$  (Hexane/EtOAc = 10:1);  $^1\text{H}$  NMR (500 MHz,  $\text{CDCl}_3$ )  $\delta$  7.31 (m, 1H), 7.21 – 7.12 (m, 3H), 3.70 (s, 3H), 3.64 – 3.19 (m, 9H), 2.97 – 2.76 (m, 3H), 2.38 – 2.35 (m, 4H), 1.53 – 1.24 (m, 1H).

$^{13}\text{C}$  NMR (125 MHz,  $\text{CDCl}_3$ )  $\delta$  173.3, 172.1, 170.9, 139.9, 131.9, 129.3, 127.8,

125.3, 122.9, 93.2, 81.9, 51.8, 51.6, 51.5, 47.2, 46.2, 45.9, 45.5, 41.6, 37.6, 34.1, 20.6. HRMS (ESI-TOF)  $m/z$ :  $[\text{M}+\text{H}]^+$  calcd for  $\text{C}_{20}\text{H}_{25}\text{O}_6$ , 385.1646, found: 385.1650.

### Methyl 2-(3-(o-tolyl)prop-2-yn-1-yl)octanoate (4af)

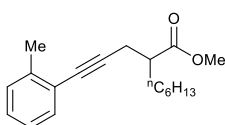

Yellow liquid (88 mg, 62% yield),  $R_f = 0.5$  (Hexane/EtOAc = 10:1);  $^1\text{H}$  NMR (500 MHz,  $\text{CDCl}_3$ )  $\delta$  7.34 (m, 1H), 7.24 – 7.15 (m, 2H), 7.14 – 7.06 (m, 1H), 3.72 (s, 3H), 2.76 – 2.57 (m, 3H), 2.39 (s, 3H), 1.72 – 1.65 (m, 2H), 1.33 – 1.22

(m, 8H), 0.91 – 0.87 (m, 3H).  $^{13}\text{C}$  NMR (125 MHz,  $\text{CDCl}_3$ )  $\delta$  175.2, 140.0, 131.8, 129.2, 127.7, 125.3, 123.3, 91.0, 80.7, 51.7, 44.9, 31.6, 31.4, 29.1, 26.9, 22.5, 22.3, 20.6, 14.0. HRMS (ESI-TOF)  $m/z$ :  $[\text{M}+\text{H}]^+$  calcd for  $\text{C}_{19}\text{H}_{27}\text{O}_2$ , 287.2006, found: 287.2000.

### Methyl 2-(3-(o-tolyl)prop-2-yn-1-yl)oct-7-enoate (4ag)

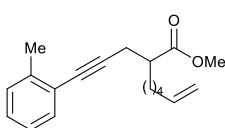

Yellow liquid (122 mg, 86% yield),  $R_f = 0.5$  (Hexane/EtOAc = 10:1);  $^1\text{H}$  NMR (500 MHz,  $\text{CDCl}_3$ )  $\delta$  7.37 – 7.32 (m, 2H), 7.17 – 7.10 (m, 2H), 5.79 – 5.63 (m, 1H), 5.04 – 4.88 (m, 2H), 3.72 (s, 3H), 2.81 – 2.59 (m, 3H), 2.39 (s, 3H), 2.10 –

1.98 – 1.74 (m, 4H), 1.57 – 1.27 (m, 4H).  $^{13}\text{C}$  NMR (125 MHz,  $\text{CDCl}_3$ )  $\delta$  175.1, 140.0, 138.6, 131.8, 129.2, 127.7, 125.4, 123.3, 114.4, 90.9, 80.8, 51.7, 44.8, 33.4, 31.2, 28.6, 26.4, 22.3, 20.6. HRMS (ESI-TOF)  $m/z$ :  $[\text{M}+\text{H}]^+$  calcd for  $\text{C}_{19}\text{H}_{25}\text{O}_2$ , 285.1849, found: 285.1856.

### Methyl 2-(3-(2-mesityl)prop-2-yn-1-yl)oct-7-enoate (4ah)

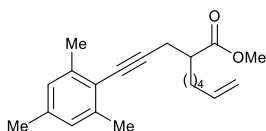

Yellow liquid (114 mg, 73% yield),  $R_f = 0.5$  (Hexane/EtOAc = 10:1);  $^1\text{H}$  NMR (500 MHz,  $\text{CDCl}_3$ )  $\delta$  6.83 (s, 2H), 5.79 – 4.99 (m, 4H), 3.71 (s, 3H), 2.84 – 2.75 (m, 1H), 2.74 – 2.59 (m, 1H), 2.34 (s, 3H), 2.26 (s, 6H), 2.10 –

1.97 (m, 2H), 1.82 – 1.66 (m, 2H), 1.52 – 1.29 (m, 4H).  $^{13}\text{C}$  NMR (125 MHz,  $\text{CDCl}_3$ )  $\delta$  175.2, 139.9 (2C), 138.6, 137.0, 127.4 (2C), 120.2, 114.4, 94.4, 79.5, 51.6, 45.0, 33.5, 31.2, 28.6, 26.4, 22.4, 21.2, 20.9 (2C). HRMS (ESI-TOF)  $m/z$ :  $[\text{M}+\text{H}]^+$  calcd for  $\text{C}_{21}\text{H}_{29}\text{O}_2$ , 313.2162, found: 313.2155.

### Methyl 2-(3-(2-chlorophenyl)prop-2-yn-1-yl)oct-7-enoate (4ai)

## SUPPORTING INFORMATION

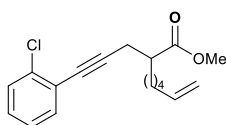

Yellow liquid (98 mg, 71% yield),  $R_f = 0.5$  (Hexane/EtOAc = 10:1);  $^1\text{H}$  NMR (500 MHz,  $\text{CDCl}_3$ )  $\delta$  7.38 – 7.19 (m, 4H), 5.80 – 4.91 (m, 3H), 3.72 (s, 3H), 2.12 – 2.02 (m, 3H), 1.76 – 1.59 (m, 4H), 1.55 – 1.29 (m, 4H).  $^{13}\text{C}$  NMR (125 MHz,  $\text{CDCl}_3$ )  $\delta$  175.0, 138.7, 135.7, 133.3, 129.1, 128.7, 126.3, 123.3, 114.4, 92.6, 78.8, 51.7, 44.5, 33.4,

31.1, 28.6, 26.3, 22.2. HRMS (ESI-TOF)  $m/z$ :  $[\text{M}+\text{H}]^+$  calcd for  $\text{C}_{18}\text{H}_{22}\text{ClO}_2$ , 305.1303, found: 305.1297.

### Methyl 3-(4-(methoxycarbonyl)dec-9-en-1-yn-1-yl)-4-methylbenzoate (4aj)

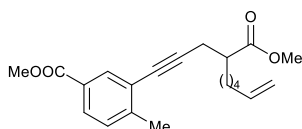

Yellow liquid (130 mg, 76% yield),  $R_f = 0.3$  (Hexane/EtOAc = 10:1);  $^1\text{H}$  NMR (500 MHz,  $\text{CDCl}_3$ )  $\delta$  8.01 (d,  $J = 1.9$  Hz, 1H), 7.83 (m, 1H), 7.24 (d,  $J = 8.0$  Hz, 1H), 5.79 – 4.91 (m, 2H), 3.89 (s, 3H), 3.72 (s, 3H), 2.83 – 2.72

(m, 1H), 2.72 – 2.59 (m, 2H), 2.43 (s, 3H), 2.11 – 2.05 (m, 2H), 1.82 – 1.61 (m, 2H), 1.52 – 1.30 (m, 4H).  $^{13}\text{C}$  NMR (125 MHz,  $\text{CDCl}_3$ )  $\delta$  175.0, 166.6, 145.3, 138.64 133.0, 129.4, 128.7, 127.6, 123.6, 114.5, 91.9, 79.9, 52.0, 51.7, 44.7, 33.4, 31.2, 28.6, 26.4, 22.2, 20.9. HRMS (ESI-TOF)  $m/z$ :  $[\text{M}+\text{H}]^+$  calcd for  $\text{C}_{21}\text{H}_{27}\text{O}_4$ , 343.1904, found: 343.1905.

### Methyl 2-(3-(o-tolyl)prop-2-yn-1-yl)dec-9-enoate (4ak)

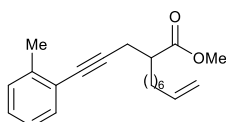

Yellow liquid (126 mg, 81% yield),  $R_f = 0.5$  (Hexane/EtOAc = 10:1);  $^1\text{H}$  NMR (500 MHz,  $\text{CDCl}_3$ )  $\delta$  7.35 – 7.28 (m, 1H), 7.19 – 7.15 (m, 2H), 7.10 – 7.06 (m, 1H), 5.80 – 4.92 (m, 3H), 3.72 (s, 3H), 2.79 – 2.58 (m, 3H), 2.39 (s, 3H), 2.07 –

1.99 (m, 2H), 1.79 – 1.67 (m, 2H), 1.42 – 1.21 (m, 8H).  $^{13}\text{C}$  NMR (125 MHz,  $\text{CDCl}_3$ )  $\delta$  175.2, 140.0, 139.0, 131.8, 129.2, 127.7, 125.4, 123.3, 114.2, 80.9, 80.8, 51.7, 44.9, 33.7, 31.4, 29.2, 28.8, 28.7, 26.9, 22.3, 20.6. HRMS (ESI-TOF)  $m/z$ :  $[\text{M}+\text{H}]^+$  calcd for  $\text{C}_{21}\text{H}_{29}\text{O}_2$ , 313.2162, found: 313.2155.

### Methyl 2-(3-mesitylprop-2-yn-1-yl)dec-9-enoate (4al)

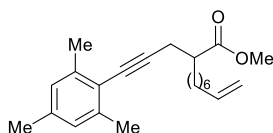

Yellow liquid (113 mg, 67% yield),  $R_f = 0.5$  (Hexane/EtOAc = 10:1);  $^1\text{H}$  NMR (500 MHz,  $\text{CDCl}_3$ )  $\delta$  6.83 (s, 2H), 5.86 – 5.74 (m, 1H), 5.00 – 4.97 (m, 2H), 3.71 (s, 3H), 2.86 – 2.75 (m, 1H), 2.75 – 2.58 (m, 2H), 2.30 – 2.23 (m,

9H), 2.16 – 1.95 (m, 4H), 1.61 – 1.28 (m, 8H).  $^{13}\text{C}$  NMR (125 MHz,  $\text{CDCl}_3$ )  $\delta$  175.3, 139.9 (2C), 139.0, 137.0, 127.4 (2C), 123.3, 114.1, 94.5, 79.5, 51.6, 45.1, 33.7, 31.4, 29.3, 28.8, 28.7, 26.9, 22.5, 21.2, 20.9 (2C). HRMS (ESI-TOF)  $m/z$ :  $[\text{M}+\text{H}]^+$  calcd for  $\text{C}_{23}\text{H}_{33}\text{O}_2$ , 341.2475, found: 341.2465.

### Methyl 10-oxo-2-(3-(o-tolyl)prop-2-yn-1-yl)decanoate (4am)

## SUPPORTING INFORMATION

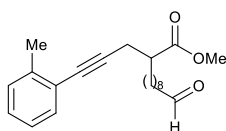

Yellow liquid (125 mg, 73% yield),  $R_f = 0.3$  (Hexane/EtOAc = 10:1);  $^1\text{H}$  NMR (500 MHz,  $\text{CDCl}_3$ )  $\delta$  9.75 – 7.16 (m, 4H), 7.14 – 7.06 (m, 1H), 3.72 (s, 3H), 2.80 – 2.60 (m, 3H), 2.43 – 2.39 (m, 1H), 2.39 (s, 3H), 1.77 – 1.56 (m, 5H), 1.32 – 1.25 (m, 10H).  $^{13}\text{C}$  NMR (125 MHz,  $\text{CDCl}_3$ )  $\delta$  202.9, 175.2, 140.0, 131.8, 129.2, 127.7, 125.4, 123.3, 90.9, 80.8, 51.7, 44.8, 43.8, 31.4, 29.3, 29.2, 29.1, 29.0, 26.9, 22.3, 22.0, 20.6. HRMS (ESI-TOF)  $m/z$ :  $[\text{M}+\text{H}]^+$  calcd for  $\text{C}_{22}\text{H}_{31}\text{O}_3$ , 343.2268, found: 343.2260.

### Dimethyl 2-(3-(o-tolyl)prop-2-yn-1-yl)dodecanedioate (4an)

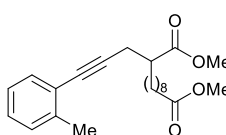

Yellow liquid (143 mg, 77% yield),  $R_f = 0.5$  (Hexane/EtOAc = 10:1);  $^1\text{H}$  NMR (500 MHz,  $\text{CDCl}_3$ )  $\delta$  7.34 – 7.28 (m, 1H), 7.21 – 7.15 (m, 2H), 7.10 – 7.05 (m, 1H), 3.72 (s, 3H), 3.66 (s, 3H), 2.80 – 2.69 (m, 3H), 2.39 (s, 3H), 2.29 – 1.72 (m, 4H), 1.64 – 1.55 (m, 2H), 1.51 – 1.29 (m, 10H).  $^{13}\text{C}$  NMR (125 MHz,  $\text{CDCl}_3$ )  $\delta$  175.2, 174.3, 140.0, 131.8, 129.2, 127.7, 125.4, 123.3, 90.9, 80.8, 51.5, 44.9, 34.0, 31.4, 29.3, 29.2, 29.1, 29.0, 28.6, 26.9, 24.9, 22.3, 20.6. HRMS (ESI-TOF)  $m/z$ :  $[\text{M}+\text{H}]^+$  calcd for  $\text{C}_{23}\text{H}_{33}\text{O}_4$ , 373.2373, found: 373.2368.

### 4-(Methoxycarbonyl)-7-(o-tolyl)hept-6-yn-1-yl 4-methylbenzoate (4ao)

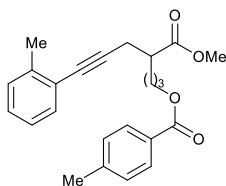

Yellow liquid (122 mg, 65% yield),  $R_f = 0.6$  (Hexane/EtOAc = 10:1);  $^1\text{H}$  NMR (500 MHz,  $\text{CDCl}_3$ )  $\delta$  7.91 – 7.32 (m, 3H), 7.17 – 7.08 (m, 5H), 4.40 – 4.30 (m, 2H), 3.73 (s, 3H), 2.80 – 2.75 (m, 3H), 2.38 (m, 6H), 2.04 – 1.67 (m, 4H).  $^{13}\text{C}$  NMR (125 MHz,  $\text{CDCl}_3$ )  $\delta$  174.7, 166.6, 143.5, 140.0, 131.8, 129.5 (2C), 129.2, 129.0 (2C), 127.7, 127.4, 125.3, 123.1, 90.3, 81.1, 64.2, 51.8, 44.3, 27.7, 26.2, 22.3, 21.6, 20.6. HRMS (ESI-TOF)  $m/z$ :  $[\text{M}+\text{H}]^+$  calcd for  $\text{C}_{24}\text{H}_{27}\text{O}_4$ , 379.1904, found: 379.1896.

### 4-(Methoxycarbonyl)-7-(o-tolyl)hept-6-yn-1-yl 4-methoxybenzoate (4ap)

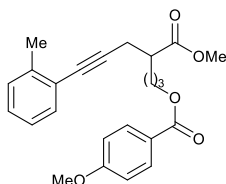

Yellow liquid (141 mg, 72% yield),  $R_f = 0.2$  (Hexane/EtOAc = 10:1);  $^1\text{H}$  NMR (500 MHz,  $\text{CDCl}_3$ )  $\delta$  7.97 – 7.86 (m, 2H), 7.38 – 7.30 (m, 1H), 7.21 – 7.13 (m, 3H), 6.94 – 6.81 (m, 2H), 4.31 – 4.25 (m, 2H), 3.83 (s, 3H), 3.73 (s, 3H), 2.86 – 2.64 (m, 3H), 2.37 (s, 3H), 1.99 – 1.65 (m, 4H).  $^{13}\text{C}$  NMR (125 MHz,  $\text{CDCl}_3$ )  $\delta$  174.7, 166.3, 163.2, 140.0, 131.8, 131.5 (2C), 129.2, 127.7 (2C), 125.4, 123.1, 122.6, 113.5, 90.4, 81.14, 64.1, 55.3, 51.8, 44.3, 27.7, 26.2, 22.3, 20.6. HRMS (ESI-TOF)  $m/z$ :  $[\text{M}+\text{H}]^+$  calcd for  $\text{C}_{24}\text{H}_{27}\text{O}_5$ , 395.1853, found: 395.1854

### 4-(Methoxycarbonyl)-7-(o-tolyl)hept-6-yn-1-yl 2-chlorobenzoate (4aq)

## SUPPORTING INFORMATION

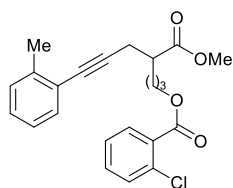

Yellow liquid (121 mg, 61% yield),  $R_f = 0.4$  (Hexane/EtOAc = 10:1);  $^1\text{H}$  NMR (500 MHz,  $\text{CDCl}_3$ )  $\delta$  7.80 – .42 (m, 3H), 7.34 – 7.28 (m, 1H), 7.27 – 7.22 (m, 1H), 7.19 – 7.08 (m, 3H), 4.36 – 4.28 (m, 2H), 3.73 (s, 3H), 2.86 – 2.64 (m, 3H), 2.36 (s, 3H), 2.03 – 1.76 (m, 4H).  $^{13}\text{C}$  NMR (125 MHz,  $\text{CDCl}_3$ )  $\delta$  174.6, 165.7,

139.9, 133.6, 132.4, 131.8, 131.3, 131.1, 130.0, 129.2, 127.8, 126.5, 125.4, 123.1, 90.3, 81.1, 65.0, 51.8, 44.3, 27.7, 26.1, 22.3, 20.6. HRMS (ESI-TOF)  $m/z$ :  $[\text{M}+\text{H}]^+$  calcd for  $\text{C}_{23}\text{H}_{24}\text{ClO}_4$ , 399.1358, found: 399.1350.

### 4-(Methoxycarbonyl)-7-(o-tolyl)hept-6-yn-1-yl thiophene-2-carboxylate (4ar)

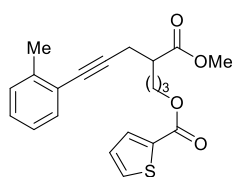

Yellow liquid (107 mg, 58% yield),  $R_f = 0.5$  (Hexane/EtOAc = 10:1);  $^1\text{H}$  NMR (400 MHz,  $\text{CDCl}_3$ )  $\delta$  7.78 – 7.75 (m, 1H), 7.51 (s, 1H), 7.36 – 7.30 (m, 1H), 7.19 – 7.10 (m, 4H), 4.32 – 4.27 (m, 2H), 3.73 (s, 3H), 2.88 – 2.63 (m, 3H), 2.37 (s, 3H), 1.97 – 1.72 (m, 4H).  $^{13}\text{C}$  NMR (100 MHz,  $\text{CDCl}_3$ )  $\delta$  174.6, 162.1, 140.0,

133.7, 133.3, 132.3, 131.8, 129.2, 127.8, 127.6, 125.4, 123.1, 90.3, 81.1, 64.6, 51.8, 44.3, 27.7, 26.2, 22.3, 20.6. HRMS (ESI-TOF)  $m/z$ :  $[\text{M}+\text{H}]^+$  calcd for  $\text{C}_{21}\text{H}_{23}\text{O}_4\text{S}$ , 371.1312, found: 371.1302.

### (Methoxycarbonyl)-8-(5-(methoxycarbonyl)-2-methylphenyl)oct-7-yn-1-yl thiophene-2-carboxylate (4as)

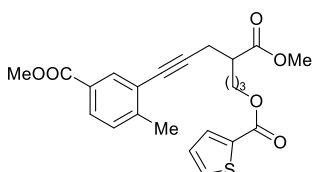

Yellow liquid (139 mg, 65% yield),  $R_f = 0.3$  (Hexane/EtOAc = 10:1);  $^1\text{H}$  NMR (500 MHz,  $\text{CDCl}_3$ )  $\delta$  8.01 – 7.77 (m, 3H), 7.28 – 7.20 (m, 2H), 7.06 – 7.01 (m, 1H), 4.32 (m, 2H), 3.89 (m, 3H), 3.74 (s, 3H), 2.87 – 2.64 (m, 3H), 2.41 (s, 3H), 1.95 – 1.74 (m, 4H).  $^{13}\text{C}$  NMR (125 MHz,  $\text{CDCl}_3$ )  $\delta$  174.5, 166.5, 162.1, 145.3,

133.6, 133.3, 133.0, 132.3, 129.4, 128.7, 127.7, 127.6, 123.5, 91.38, 80.2, 64.5, 52.0, 51.9, 44.1, 27.7, 26.2, 22.2, 20.9. HRMS (ESI-TOF)  $m/z$ :  $[\text{M}+\text{H}]^+$  calcd for  $\text{C}_{23}\text{H}_{25}\text{O}_6\text{S}$ , 429.1366, found: 429.1360.

### 9-(2-Methoxy-2-oxoethyl)-11-(o-tolyl)undec-10-yn-1-yl 4-methylbenzoate (4at)

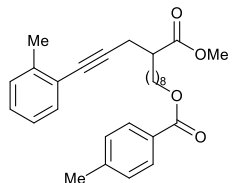

Yellow liquid (151 mg, 72% yield),  $R_f = 0.3$  (Hexane/EtOAc = 10:1);  $^1\text{H}$  NMR (500 MHz,  $\text{CDCl}_3$ )  $\delta$  7.95 – 7.90 (m, 2H), 7.23 (d,  $J = 7.9$  Hz, 1H), 7.19 – 7.14 (m, 2H), 7.09 (m, 3H), 4.29 (d,  $J = 5.6$  Hz, 2H), 3.71 (s, 3H), 2.80 – 2.59 (m, 3H), 2.41 – 2.36 (m, 6H), 1.79 – 1.68 (m, 4H), 1.37 – 1.24 (m, 10H).  $^{13}\text{C}$  NMR (125

MHz,  $\text{CDCl}_3$ )  $\delta$  175.2, 166.7, 143.4, 139.9, 131.8, 129.5 (2C), 129.2, 129.0 (2C), 127.7, 127.4, 125.3, 123.3, 90.9, 80.8, 64.8, 51.7, 44.9, 31.4, 29.3, 29.2, 29.1, 28.6, 26.9, 25.9, 22.3, 21.6, 20.6. HRMS (ESI-TOF)  $m/z$ :  $[\text{M}+\text{H}]^+$  calcd for  $\text{C}_{29}\text{H}_{37}\text{O}_4$ , 449.2686, found: 449.2680.

## SUPPORTING INFORMATION

### Methyl 8-phenoxy-2-(3-(*o*-tolyl)prop-2-yn-1-yl)octanoate (4au)

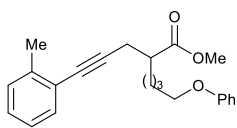

Yellow liquid (113 mg, 65% yield),  $R_f = 0.6$  (Hexane/EtOAc = 10:1);  $^1\text{H NMR}$  (500 MHz,  $\text{CDCl}_3$ )  $\delta$  7.33 – 7.30 (m, 1H), 7.25 – 7.21 (m, 2H), 7.17 – 7.11 (m, 2H), 7.07 – 7.01 (m, 1H), 6.93 – 6.83 (m, 3H), 3.93 – 3.87 (m, 2H), 3.69 (s, 3H), 2.79 – 2.60 (m, 3H), 2.36 (s, 3H), 1.87 – 1.72 (m, 4H), 1.51 (m, 2H).  $^{13}\text{C NMR}$  (125 MHz,  $\text{CDCl}_3$ )  $\delta$  175.0, 158.9, 139.9, 131.8, 129.3 (2C), 129.2, 127.7, 125.4, 123.2, 120.5, 114.4 (2C), 90.7, 80.9, 67.3, 51.7, 44.7, 31.1, 29.1, 23.6, 22.3, 20.6. HRMS (ESI-TOF)  $m/z$ :  $[\text{M}+\text{H}]^+$  calcd for  $\text{C}_{23}\text{H}_{27}\text{O}_3$ , 351.1955, found: 351.1945.

### Methyl 2-(2-phenoxyethyl)-5-(*o*-tolyl)pent-4-ynoate (4av)

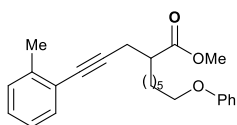

Yellow liquid (109 mg, 68% yield),  $R_f = 0.6$  (Hexane/EtOAc = 10:1);  $^1\text{H NMR}$  (500 MHz,  $\text{CDCl}_3$ )  $\delta$  7.34 – 7.24 (m, 3H), 7.21 – 7.15 (m, 2H), 7.14 – 7.06 (m, 3H), 6.96 – 6.86 (m, 1H), 3.94 – 3.85 (m, 2H), 3.72 (s, 3H), 2.81 – 2.70 (m, 3H), 2.39 (s, 3H), 1.76 – 1.62 (m, 4H), 1.51 – 1.42 (m, 2H), 1.38 – 1.24 (m, 4H).  $^{13}\text{C NMR}$  (125 MHz,  $\text{CDCl}_3$ )  $\delta$  175.2, 159.0, 140.0, 131.8, 129.4 (2C), 129.3, 127.7, 125.4, 123.3, 120.5, 114.4 (2C), 90.9, 80.8, 67.7, 51.7, 44.9, 31.3, 29.3, 29.2, 26.9, 25.9, 22.3, 20.7. HRMS (ESI-TOF)  $m/z$ :  $[\text{M}+\text{H}]^+$  calcd for  $\text{C}_{25}\text{H}_{31}\text{O}_3$ , 379.2268, found: 379.2268.

### methyl 8-(oxiran-2-yl)-2-(3-(*o*-tolyl)prop-2-yn-1-yl)octanoate (4aw)

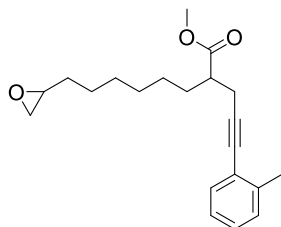

Yellow liquid (85 mg, 52% yield),  $R_f = 0.5$  (Hexane/EtOAc = 2:1);  $^1\text{H NMR}$  (500 MHz,  $\text{CDCl}_3$ )  $\delta$  7.34 – 7.17 (m, 3H), 7.10 – 7.05 (m, 1H), 3.76 – 3.72 (m, 1H), 3.72 (s, 3H), 3.53 – 3.37 (m, 2H), 2.78 – 2.59 (m, 2H), 2.54 – 2.51 (m, 1H), 2.39 (s, 3H), 1.78 – 1.65 (m, 2H), 1.62 – 1.45 (m, 4H), 1.42 – 1.28 (m, 6H).  $^{13}\text{C NMR}$  (125 MHz,  $\text{CDCl}_3$ )  $\delta$  172.1, 139.9, 131.8, 129.2, 127.7, 125.4, 123.2, 95.3, 80.9, 71.0, 51.7, 44.8, 40.7, 40.2, 35.0, 34.6, 29.1, 27.1, 25.5, 22.3, 20.6. HRMS (ESI-TOF)  $m/z$ :  $[\text{M}+\text{H}]^+$  calcd for  $\text{C}_{21}\text{H}_{29}\text{O}_3$ , 328.2111, found: 328.2119.

### Ethyl 2-(phenylethynyl)cycloheptane-1-carboxylate (6a)

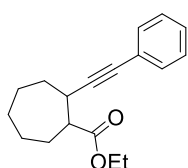

Yellow liquid (73 mg, 54% yield),  $R_f = 0.5$  (Hexane/EtOAc = 10:1);  $^1\text{H NMR}$  (500 MHz,  $\text{CDCl}_3$ )  $\delta$  7.42 – 7.30 (m, 3H), 7.30 – 7.23 (m, 2H), 4.23 – 4.10 (m, 2H), 3.49 – 3.46 (m, 1H), 2.62 – 3.58 (m, 2H), 2.10 – 1.91 (m, 3H), 1.90 – 1.73 (m, 1H), 1.72



## SUPPORTING INFORMATION

– 1.55 (m, 3H), 1.49 – 1.26 (m, 5H).  $^{13}\text{C}$  NMR (125 MHz,  $\text{CDCl}_3$ )  $\delta$  174.5, 131.5 (2C), 128.1 (2C), 127.5, 123.8, 90.2, 83.5, 60.4, 48.9, 33.5, 33.0, 27.4, 26.3, 25.9, 24.7, 14.2. HRMS (ESI-TOF)  $m/z$ :  $[\text{M}+\text{H}]^+$  calcd for  $\text{C}_{18}\text{H}_{23}\text{O}_2$ , 271.1693, found: 271.1693.

### Ethyl 2-(phenylethynyl)cyclooctane-1-carboxylate (6b)

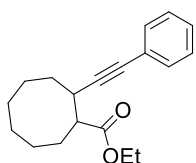

Yellow liquid (74 mg, 52% yield),  $R_f = 0.6$  (Hexane/EtOAc = 10:1);  $^1\text{H}$  NMR (500 MHz,  $\text{CDCl}_3$ )  $\delta$  7.37 – 7.28 (m, 2H), 7.26 – 7.16 (m, 2H), 4.26 – 4.10 (m, 2H), 3.36 – 2.79 (m, 2H), 2.14 – 1.96 (m, 1H), 1.96 (m, 3H), 1.80 – 1.27 (m, 11H).  $^{13}\text{C}$  NMR (125 MHz,  $\text{CDCl}_3$ )  $\delta$  174.9, 131.6 (2C), 128.0 (2C), 127.5, 123.8, 90.8, 82.5, 60.5, 45.3, 33.4, 31.2, 27.7, 26.2, 25.3, 25.0, 24.3, 14.2. HRMS (ESI-TOF)  $m/z$ :  $[\text{M}+\text{H}]^+$  calcd for  $\text{C}_{19}\text{H}_{25}\text{O}_2$ , 285.1849, found: 285.1842.

### Ethyl-3-(phenylethynyl)bicyclo[2.2.1]heptane-2-carboxylate (6c)

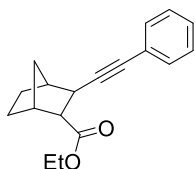

Yellow liquid (75 mg, 56% yield),  $R_f = 0.6$  (Hexane/EtOAc = 10:1);  $^1\text{H}$  NMR (500 MHz,  $\text{CDCl}_3$ )  $\delta$  7.36 – 7.29 (m, 2H), 7.27 – 7.22 (m, 3H), 4.19 – 4.02 (m, 2H), 2.98 – 2.95 (m, 1H), 2.72 – 2.33 (m, 4H), 2.11 (m, 2H), 1.70 – 1.12 (m, 6H).  $^{13}\text{C}$  NMR (125 MHz,  $\text{CDCl}_3$ )  $\delta$  172.9, 133.7 (2C), 127.6 (2C), 127.5, 122.2, 90.3, 82.5, 60.2, 52.1, 43.5, 39.0, 38.8, 36.3, 28.6, 28.0, 14.3. HRMS (ESI-TOF)  $m/z$ :  $[\text{M}+\text{H}]^+$  calcd for  $\text{C}_{18}\text{H}_{21}\text{O}_2$ , 269.1536, found: 269.1532.

### Isopropyl 3-((2-chlorophenyl)ethynyl)bicyclo[2.2.1]heptane-2-carboxylate (6d)

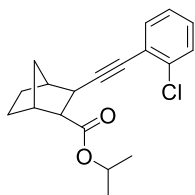

Yellow liquid (113 mg, 72% yield),  $R_f = 0.6$  (Hexane/EtOAc = 10:1);  $^1\text{H}$  NMR (500 MHz,  $\text{CDCl}_3$ )  $\delta$  7.36 – 7.29 (m, 2H), 7.27 – 7.22 (m, 2H), 5.06 – 5.01 (m, 1H), 3.29 – 3.22 (m, 1H), 2.95 – 2.51 (m, 2H), 2.49 – 2.22 (m, 1H), 2.10 – 1.57 (m, 6H), 1.44 – 1.23 (m, 6H).  $^{13}\text{C}$  NMR (125 MHz,  $\text{CDCl}_3$ )  $\delta$  172.9, 136.0, 133.7, 132.6, 128.8, 127.6, 127.5, 122.2, 90.3, 82.5, 60.2, 52.1, 43.5, 39.5, 36.2, 33.4, 28.0, 27.1, 21.6. HRMS (ESI-TOF)  $m/z$ :  $[\text{M}+\text{H}]^+$  calcd for  $\text{C}_{19}\text{H}_{22}\text{ClO}_2$ , 317.1303, found: 317.1294.

### Cyclobutyl-3-(phenylethynyl)bicyclo[2.2.1]heptane-2-carboxylate (6e)

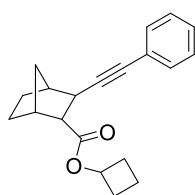

Yellow liquid (74 mg, 53% yield),  $R_f = 0.6$  (Hexane/EtOAc = 10:1);  $^1\text{H}$  NMR (500 MHz,  $\text{CDCl}_3$ )  $\delta$  7.35 – 7.31 (m, 2H), 7.28 – 7.23 (m, 3H), 4.95 (s, 1H), 2.97 (m, 1H), 2.58 – 2.54 (m, 2H), 2.46 (d,  $J = 4.3$  Hz, 2H), 2.33 – 2.13 (m, 4H), 1.72 – 1.54 (m, 2H), 1.54 – 1.33 (m, 3H), 1.28 – 1.19 (m, 2H).  $^{13}\text{C}$  NMR (125 MHz,  $\text{CDCl}_3$ )  $\delta$

## SUPPORTING INFORMATION

172.2, 131.5 (2C), 128.0 (2C), 127.6, 123.6, 90.3, 82.6, 68.5, 51.8, 43.6, 39.0, 38.9, 36.3, 30.4, 30.3, 28.7, 28.0, 13.5. HRMS (ESI-TOF)  $m/z$ :  $[M+H]^+$  calcd for  $C_{20}H_{23}O_2$ , 295.1693, found: 295.1695.

### Cyclopentyl-3-(phenylethynyl)bicyclo[2.2.1]heptane-2-carboxylate (6f)

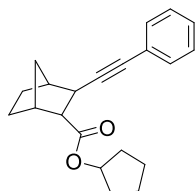

Yellow liquid (85 mg, 55% yield),  $R_f = 0.6$  (Hexane/EtOAc = 10:1);  $^1H$  NMR (500 MHz,  $CDCl_3$ )  $\delta$  7.36 – 7.31 (m, 2H), 7.26 – 7.22 (m, 3H), 5.13 – 2.98 (m, 2H), 2.61 – 2.54 (m, 2H), 2.45 (d,  $J = 4.3$  Hz, 2H), 1.77 – 1.58 (m, 7H), 1.57 – 1.39 (m, 3H), 1.33 – 1.14 (m, 3H).  $^{13}C$  NMR (125 MHz,  $CDCl_3$ )  $\delta$  172.6, 131.5 (2C), 128.0 (2C),

127.5, 123.7, 90.4, 82.5, 76.9, 52.0, 43.6, 39.1, 39.0, 36.9, 32.7, 32.5, 28.7, 28.0, 23.8, 23.7. HRMS (ESI-TOF)  $m/z$ :  $[M+H]^+$  calcd for  $C_{21}H_{25}O_2$ , 309.1849, found: 309.1849.

### Cyclohexyl-3-(phenylethynyl)bicyclo[2.2.1]heptane-2-carboxylate (6g)

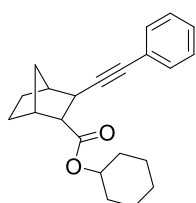

Yellow liquid (101 mg, 63% yield),  $R_f = 0.6$  (Hexane/EtOAc = 10:1);  $^1H$  NMR (500 MHz,  $CDCl_3$ )  $\delta$  7.32 (m, 2H), 7.27 – 7.21 (m, 3H), 4.73 – 2.99 (m, 2H), 2.64 – 2.55 (m, 2H), 2.46 – 2.13 (m, 2H), 1.82 – 1.71 (m, 3H), 1.68 – 1.48 (m, 6H), 1.47 – 1.14 (m, 6H).  $^{13}C$  NMR (125 MHz,  $CDCl_3$ )  $\delta$  172.3, 131.4 (2C), 128.0 (2C), 127.5,

123.7, 90.5, 82.4, 72.4, 52.1, 43.6, 39.1, 39.0, 31.7 (2C), 31.6, 28.7, 28.0, 23.6 (2C), 23.5. HRMS (ESI-TOF)  $m/z$ :  $[M+H]^+$  calcd for  $C_{22}H_{27}O_2$ , 323.2006, found: 323.2005.

### Allyl-3-(phenylethynyl)bicyclo[2.2.1]heptane-2-carboxylate (6h)

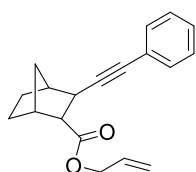

Yellow liquid (94 mg, 67% yield),  $R_f = 0.6$  (Hexane/EtOAc = 10:1);  $^1H$  NMR (500 MHz,  $CDCl_3$ )  $\delta$  7.36 – 7.30 (m, 2H), 7.30 – 7.22 (m, 3H), 5.88 – 4.50 (m, 5H), 2.99 – 2.12 (m, 6H), 1.67 – 1.50 (m, 1H), 1.35 – 1.16 (m, 3H).  $^{13}C$  NMR (125 MHz,  $CDCl_3$ )  $\delta$  172.5, 132.4, 131.5 (2C), 128.1 (2C), 127.6, 123.5, 118.1, 90.2, 82.7,

65.15, 52.2, 43.5, 39.0, 38.8, 36.3, 28.6, 28.0. HRMS (ESI-TOF)  $m/z$ :  $[M+H]^+$  calcd for  $C_{19}H_{21}O_2$ , 281.1536, found: 281.1532.

### But-3-en-1-yl-3-(phenylethynyl)bicyclo[2.2.1]heptane-2-carboxylate (6i)

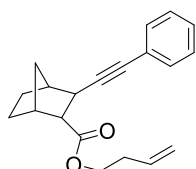

Yellow liquid (74 mg, 51% yield),  $R_f = 0.6$  (Hexane/EtOAc = 10:1);  $^1H$  NMR (500 MHz,  $CDCl_3$ )  $\delta$  7.36 – 7.30 (m, 2H), 7.26 – 7.23 (m, 3H), 5.06 – 4.96 (m, 1H), 4.13 – 4.04 (m, 4H), 2.98 – 2.47 (m, 6H), 2.34 – 2.33 (m, 1H), 1.64 – 1.34 (m, 2H), 1.30 – 1.15 (m, 3H).  $^{13}C$  NMR (125 MHz,  $CDCl_3$ )  $\delta$  172.9, 134.1, 131.4 (2C),

128.1 (2C), 127.6, 123.6, 113.5, 90.3, 82.6, 63.4, 52.2, 43.5, 38.9, 38.8, 36.3, 33.0, 28.6, 28.0. HRMS (ESI-TOF)  $m/z$ :  $[M+H]^+$  calcd for  $C_{20}H_{23}O_2$ , 295.1693, found: 295.1695.

## SUPPORTING INFORMATION

### Benzyl-3-(phenylethynyl)bicyclo[2.2.1]heptane-2-carboxylate (6j)

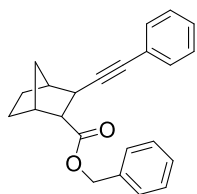

Yellow liquid (100 mg, 58% yield),  $R_f = 0.6$  (Hexane/EtOAc = 10:1);  $^1\text{H}$  NMR (500 MHz,  $\text{CDCl}_3$ )  $\delta$  7.36 – 7.27 (m, 6H), 7.25 – 7.21 (m, 4H), 5.15 – 5.08 (m, 1H), 4.98 – 3.00 (m, 2H), 2.73 – 2.15 (m, 4H), 1.62 – 1.61 (m, 2H), 1.36 – 1.15 (m, 3H).  $^{13}\text{C}$  NMR (125 MHz,  $\text{CDCl}_3$ )  $\delta$  172.8, 135.9, 131.5 (2C), 128.4 (2C), 128.3 (2C), 128.1 (2C), 128.0, 127.3, 123.5, 90.4, 82.7, 66.3, 52.3, 43.5, 39.1, 38.9, 36.4, 28.7, 28.0. HRMS (ESI-TOF)  $m/z$ :  $[\text{M}+\text{H}]^+$  calcd for  $\text{C}_{23}\text{H}_{23}\text{O}_2$ , 331.1693, found: 331.1688.

### 4-Methylbenzyl-3-(phenylethynyl)bicyclo[2.2.1]heptane-2-carboxylate (6k)

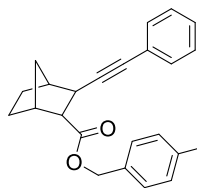

Yellow liquid (109 mg, 61% yield),  $R_f = 0.5$  (Hexane/EtOAc = 10:1);  $^1\text{H}$  NMR (500 MHz,  $\text{CDCl}_3$ )  $\delta$  7.39 – 7.29 (m, 2H), 7.25 – 7.09 (m, 7H), 5.11 – 4.94 (m, 2H), 2.99 – 2.48 (m, 4H), 2.31 (s, 3H), 2.14 – 1.49 (m, 3H), 1.3 – 1.22 (m, 3H).  $^{13}\text{C}$  NMR (125 MHz,  $\text{CDCl}_3$ )  $\delta$  172.8, 137.8, 132.9, 131.5 (2C), 129.1 (2C), 128.4 (2C), 128.1 (2C), 127.6, 123.5, 90.4, 82.7, 66.2, 52.3, 43.5, 39.1, 38.8, 36.3, 28.6, 27.9, 21.1. HRMS (ESI-TOF)  $m/z$ :  $[\text{M}+\text{H}]^+$  calcd for  $\text{C}_{24}\text{H}_{25}\text{O}_2$ , 345.1849, found: 345.1844.

### phenethyl-3-(phenylethynyl)bicyclo[2.2.1]heptane-2-carboxylate (6l)

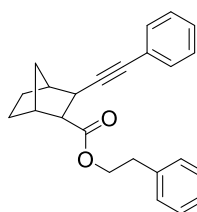

Yellow liquid (116 mg, 68% yield),  $R_f = 0.5$  (Hexane/EtOAc = 10:1);  $^1\text{H}$  NMR (500 MHz,  $\text{CDCl}_3$ )  $\delta$  7.32 – 7.13 (m, 10H), 4.31 – 4.23 (m, 2H), 2.99 – 2.11 (m, 7H), 1.66 – 1.50 (m, 2H), 1.34 – 1.15 (m, 3H).  $^{13}\text{C}$  NMR (125 MHz,  $\text{CDCl}_3$ )  $\delta$  172.85, 137.91, 131.47 (2C), 128.84 (2C), 128.34 (2C), 128.17 (2C), 127.6, 126.3, 123.5, 90.3, 82.6, 64.8, 52.2, 43.5, 39.0, 38.8, 36.3, 35.1, 28.6, 27.9. HRMS (ESI-TOF)  $m/z$ :  $[\text{M}+\text{H}]^+$  calcd for  $\text{C}_{24}\text{H}_{25}\text{O}_2$ , 345.1849, found: 345.1844.

### methyl-d<sub>3</sub>-3-(phenylethynyl)bicyclo[2.2.1]heptane-2-carboxylate (6m)

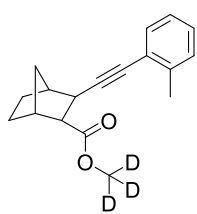

Yellow liquid (86 mg, 67% yield),  $R_f = 0.6$  (Hexane/EtOAc = 10:1);  $^1\text{H}$  NMR (400 MHz,  $\text{CDCl}_3$ )  $\delta$  7.34 – 7.29 (m, 1H), 7.16 – 7.13 (m, 2H), 7.10 – 7.02 (m, 1H), 3.01 – 2.60 (m, 3H), 2.55 – 2.45 (m, 1H), 2.38 (s, 3H), 2.13 – 2.06 (m, 1H), 1.69 – 1.49 (m, 2H), 1.36 – 1.24 (m, 3H).  $^{13}\text{C}$  NMR (125 MHz,  $\text{CDCl}_3$ )  $\delta$  173.4, 140.0, 131.8, 129.2, 127.7, 125.3, 123.3, 94.2, 81.4, 52.3, 43.8, 39.3, 38.9, 36.3, 28.7, 28.0, 20.7. HRMS (ESI-TOF)  $m/z$ :  $[\text{M}+\text{H}]^+$  calcd for  $\text{C}_{18}\text{H}_{18}\text{D}_3\text{O}_2$ , 272.1724, found: 272.1715.

### methyl-3-(o-tolyethynyl)bicyclo[2.2.1]heptane-2-carboxylate (4ax)

## SUPPORTING INFORMATION

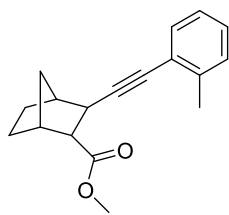

Yellow liquid (111 mg, 82% yield),  $R_f = 0.5$  (Hexane/EtOAc=50:1);  $^1\text{H}$  NMR (400 MHz,  $\text{CDCl}_3$ )  $\delta$  7.34 – 7.22 (m, 1H), 7.18 – 7.08 (m, 3H), 3.62 (s, 3H), 3.02 – 2.45 (m, 4H), 2.38 (s, 3H), 2.13 – 2.06 (m, 1H), 1.69 – 1.49 (m, 2H), 1.40 – 1.15 (m, 3H).  $^{13}\text{C}$  NMR (100 MHz,  $\text{CDCl}_3$ )  $\delta$  173.3, 139.9, 131.8, 129.2, 127.6, 125.3, 123.3, 94.1, 81.4, 52.3, 51.3, 43.7, 39.3, 38.8, 36.3, 28.6, 27.9, 20.6. HRMS (ESI-TOF)  $m/z$ :  $[\text{M}+\text{H}]^+$  calcd for  $\text{C}_{18}\text{H}_{21}\text{O}_2$ , 269.1536, found: 269.1544.

# SUPPORTING INFORMATION

## 8. $^1\text{H}$ NMR and $^{13}\text{C}$ NMR Spectra for Products

$^1\text{H}$  NMR (500 MHz,  $\text{CDCl}_3$ ) spectrum of compound 2f

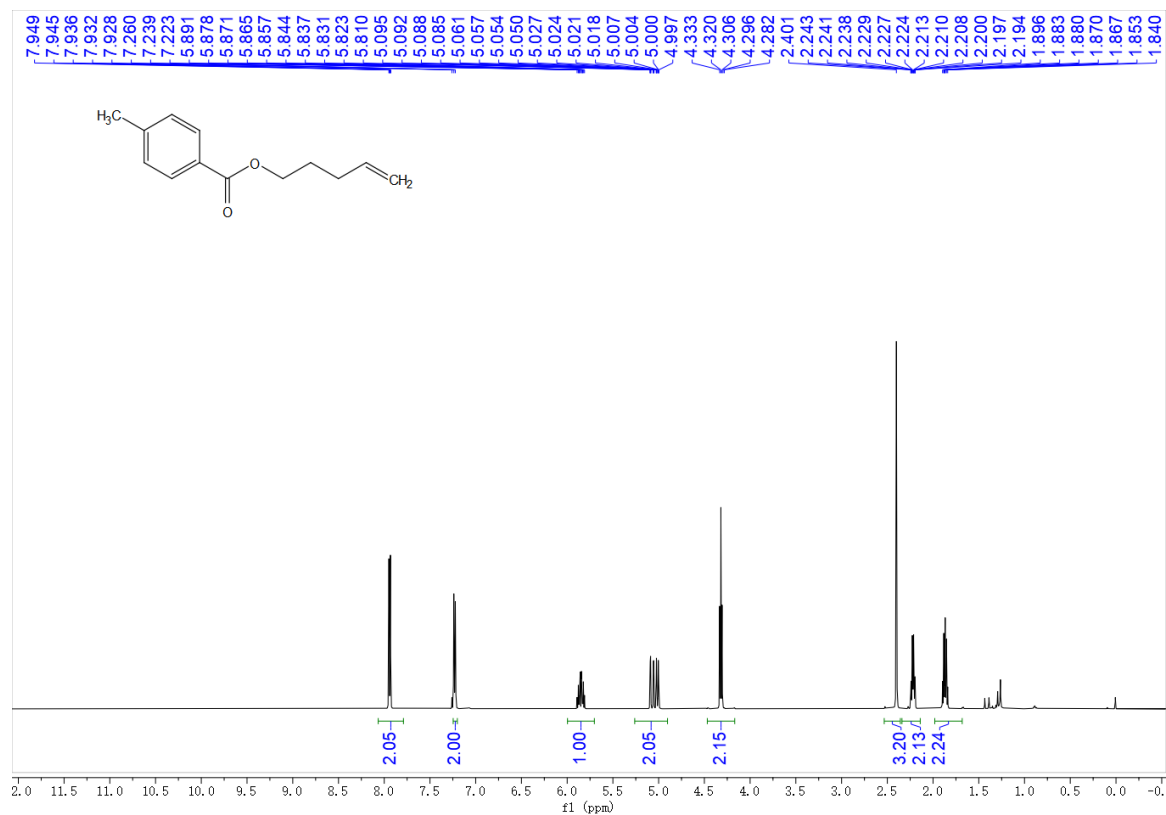

$^{13}\text{C}$  NMR (125 MHz,  $\text{CDCl}_3$ ) spectrum of compound 2f

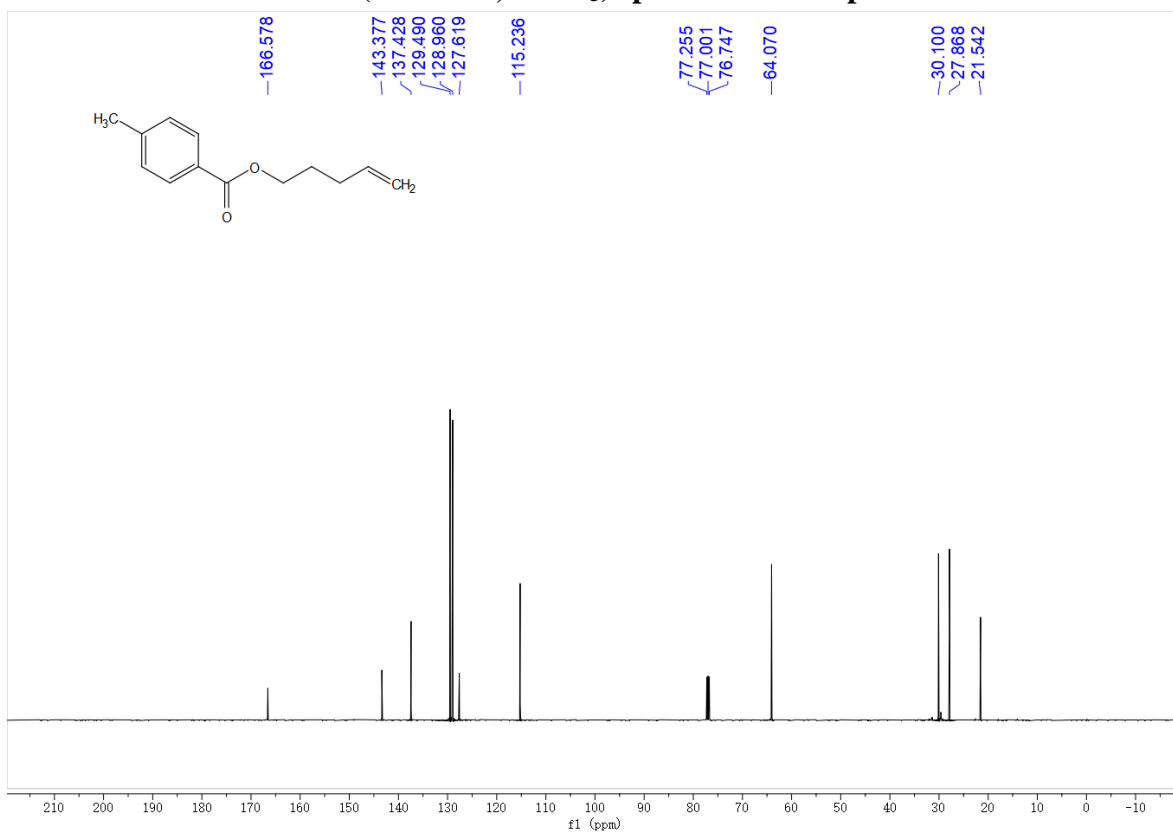

# SUPPORTING INFORMATION

## <sup>1</sup>H NMR (400 MHz, CDCl<sub>3</sub>) spectrum of compound 2h

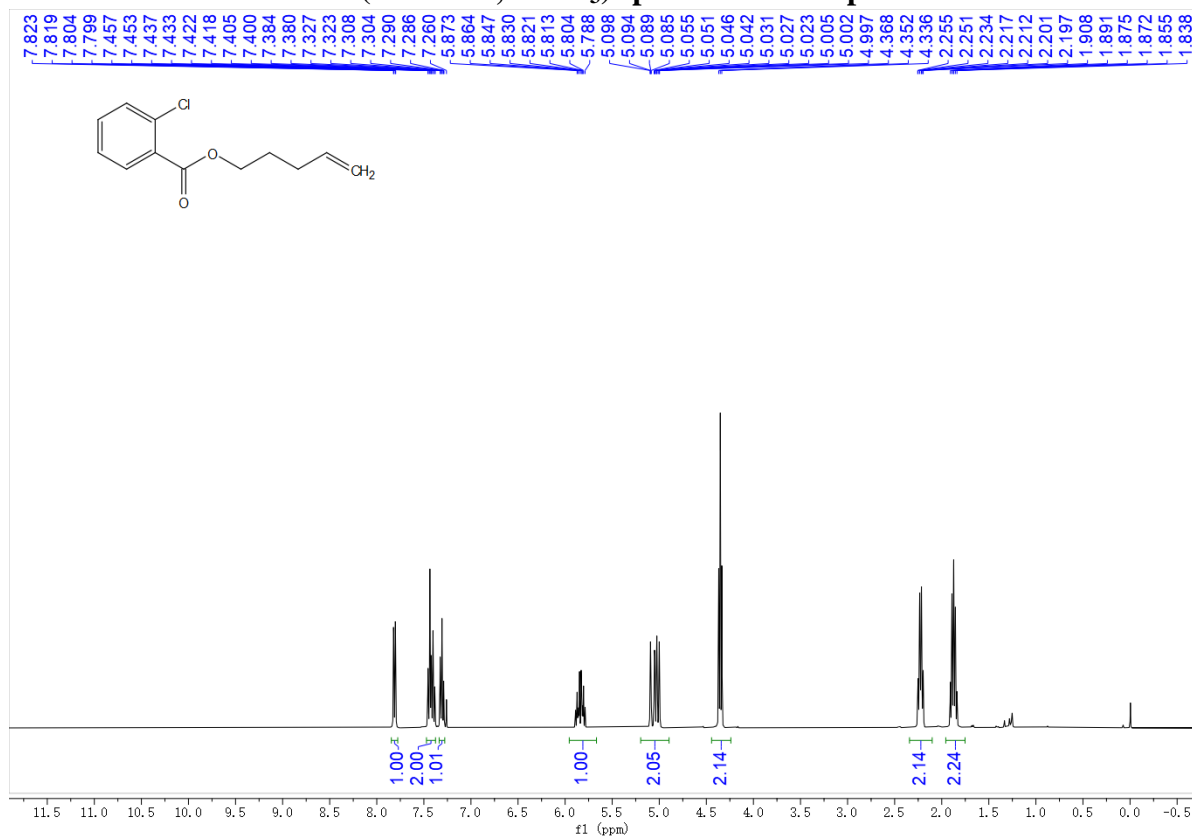

## <sup>13</sup>C NMR (100 MHz, CDCl<sub>3</sub>) spectrum of compound 2h

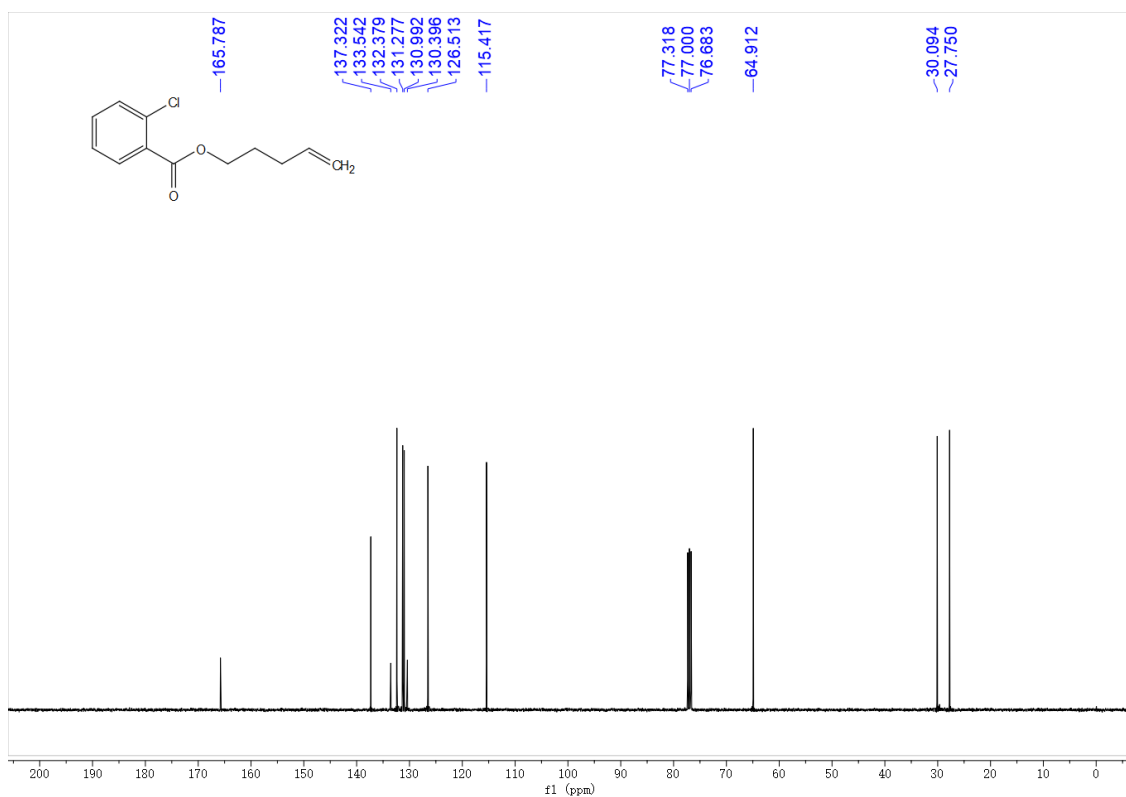

# SUPPORTING INFORMATION

## <sup>1</sup>H NMR (500 MHz, CDCl<sub>3</sub>) spectrum of compound 2k

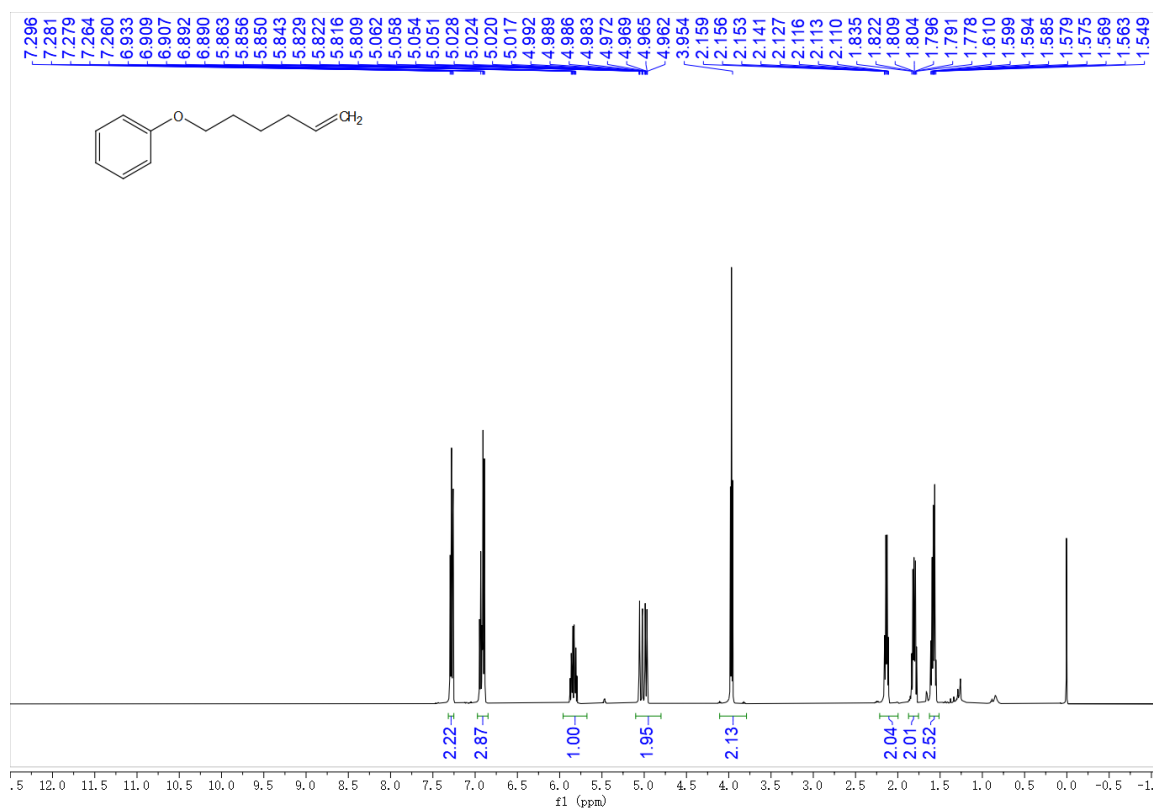

## <sup>13</sup>C NMR (125 MHz, CDCl<sub>3</sub>) spectrum of compound 2k

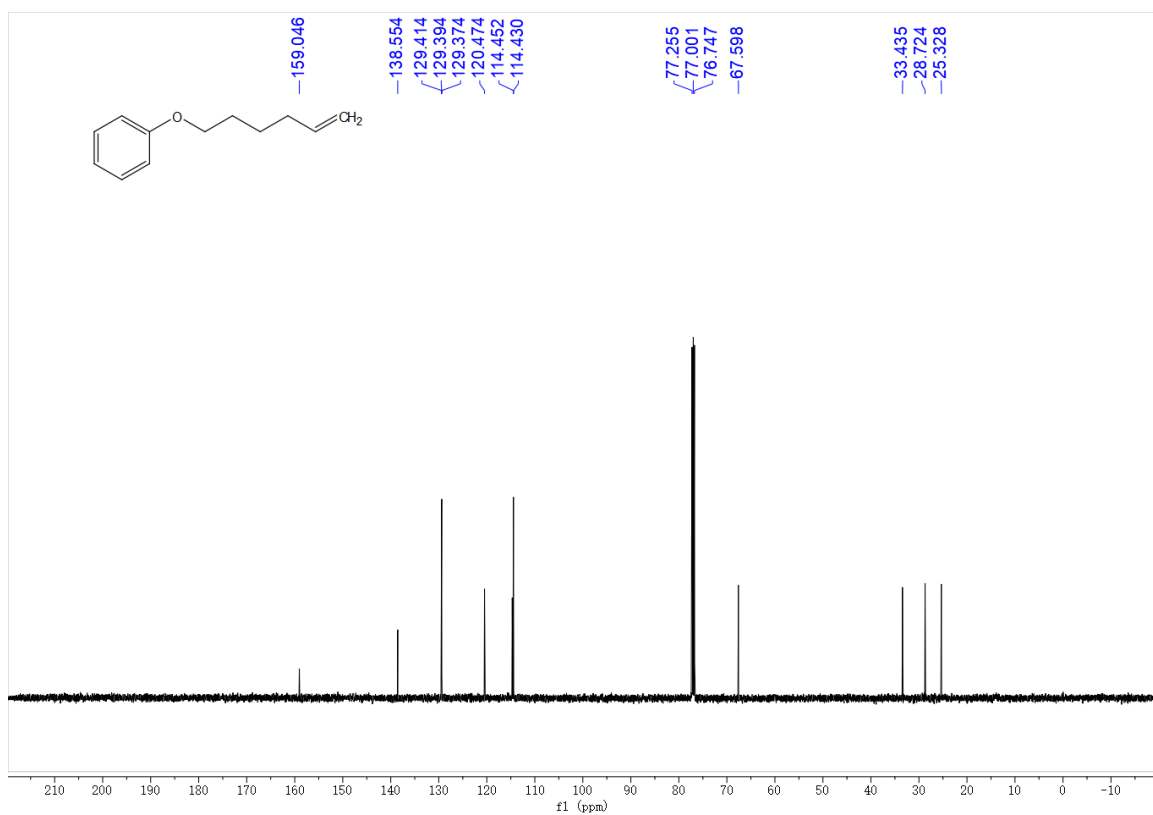

# SUPPORTING INFORMATION

## $^1\text{H}$ NMR (500 MHz, $\text{CDCl}_3$ ) spectrum of compound 21

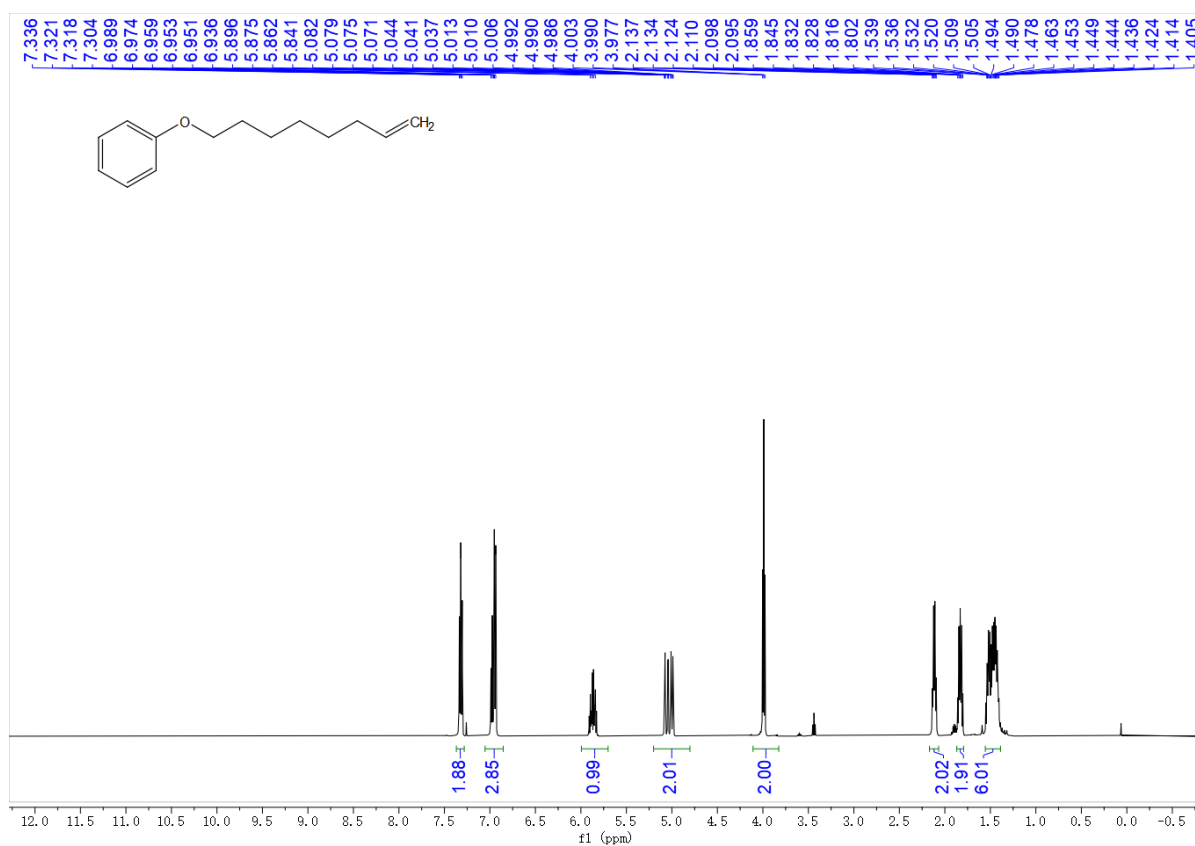

## $^{13}\text{C}$ NMR (125 MHz, $\text{CDCl}_3$ ) spectrum of compound 21

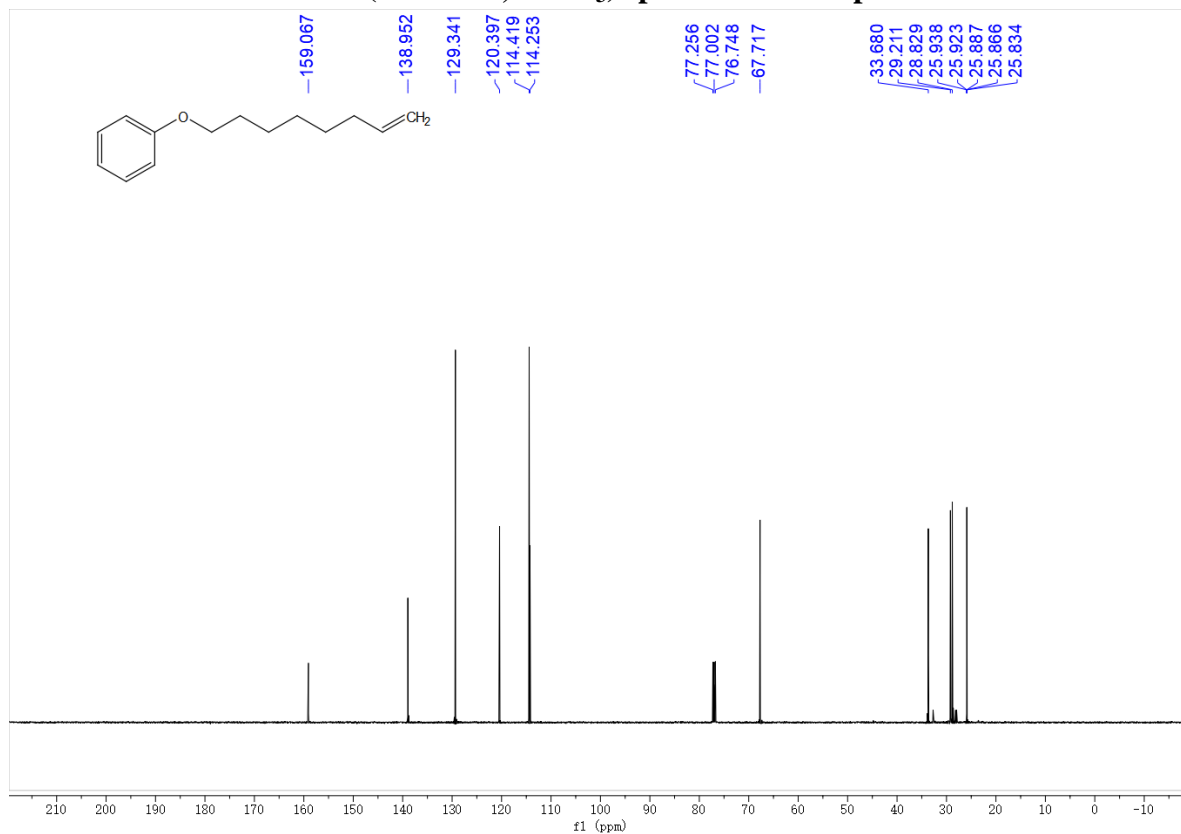



# SUPPORTING INFORMATION

## <sup>1</sup>H NMR (500 MHz, CDCl<sub>3</sub>) spectrum of compound 4a

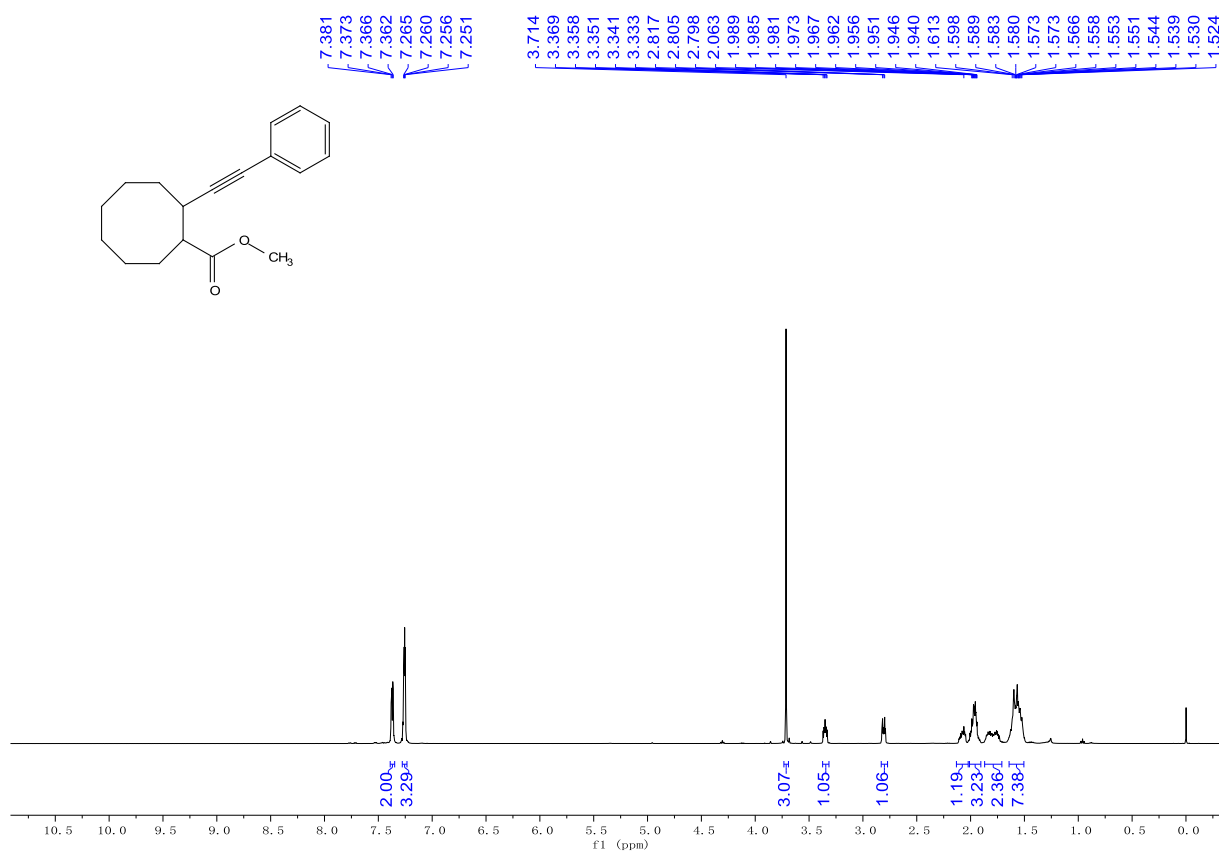

## <sup>13</sup>C NMR (125 MHz, CDCl<sub>3</sub>) spectrum of compound 4a

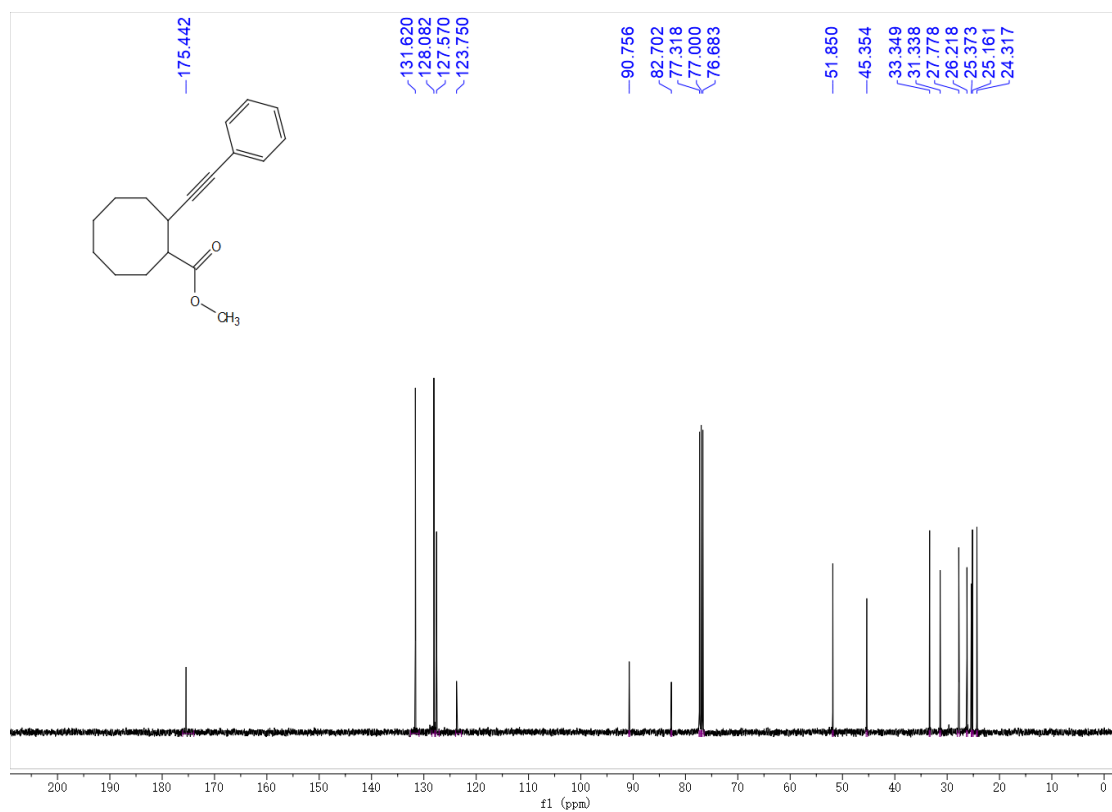

# SUPPORTING INFORMATION

## <sup>1</sup>H NMR (500 MHz, CDCl<sub>3</sub>) spectrum of compound 4b

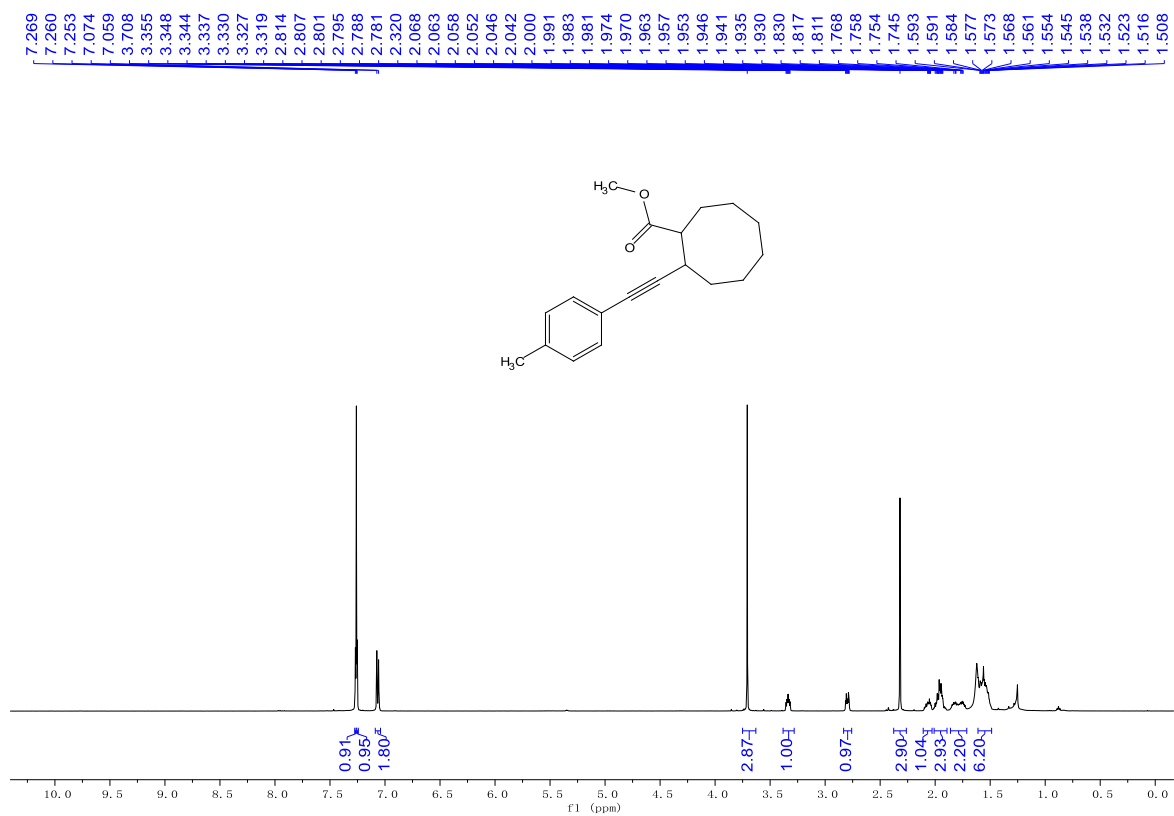

## <sup>13</sup>C NMR (125 MHz, CDCl<sub>3</sub>) spectrum of compound 4b

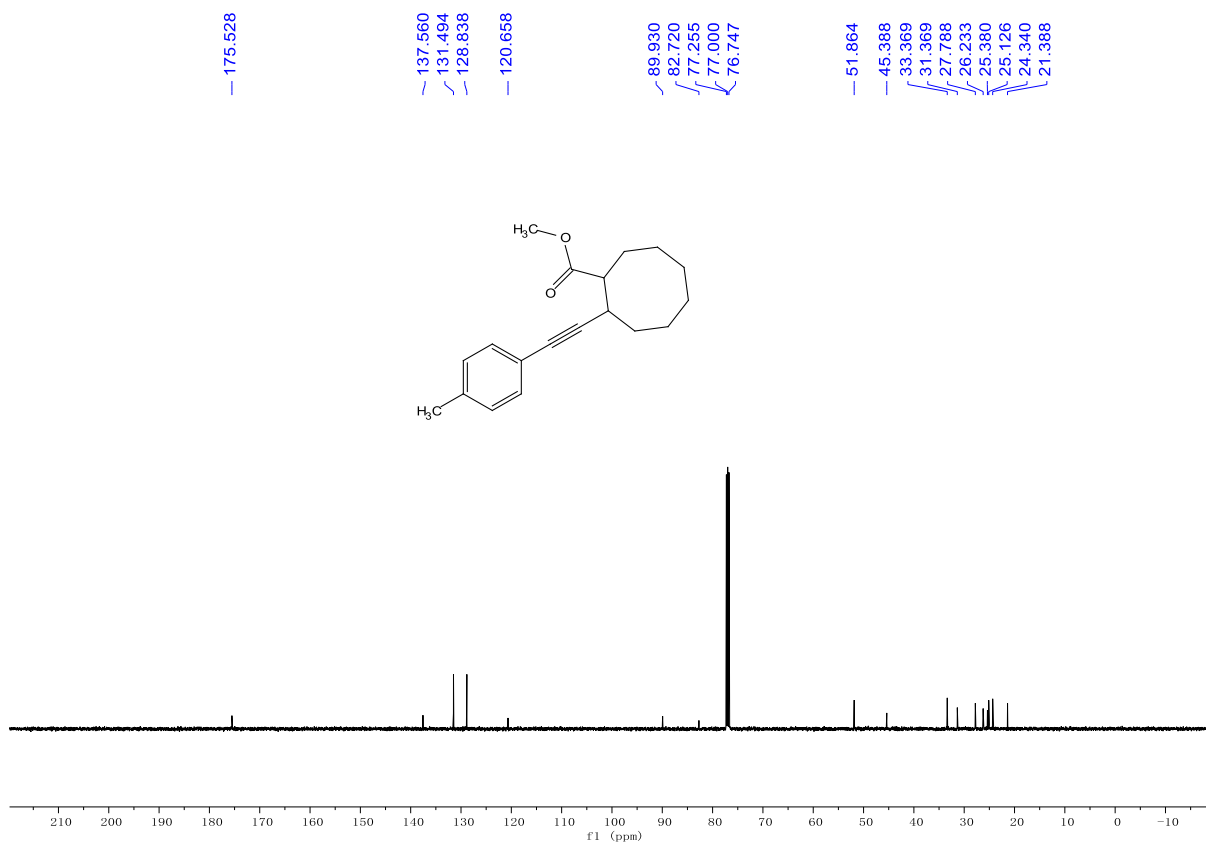

# SUPPORTING INFORMATION

## <sup>1</sup>H NMR (500 MHz, CDCl<sub>3</sub>) spectrum of compound 4c

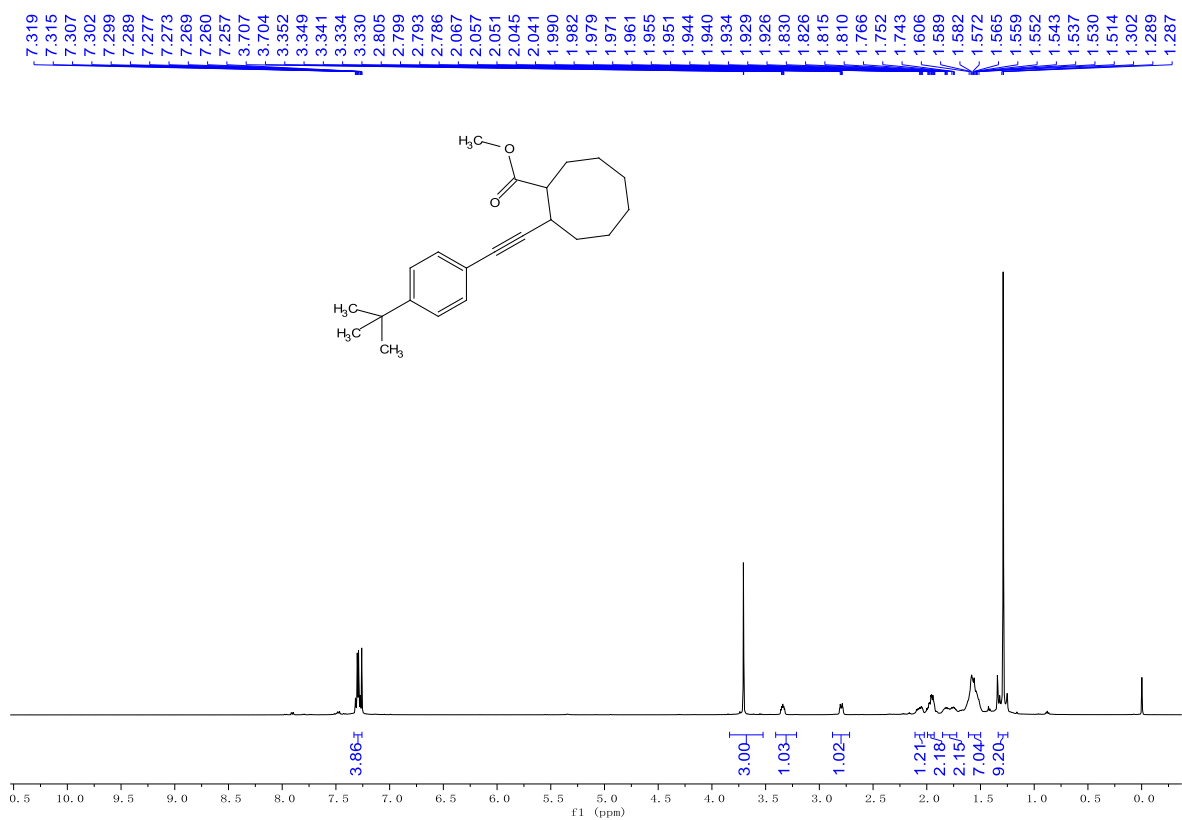

## <sup>13</sup>C NMR (125 MHz, CDCl<sub>3</sub>) spectrum of compound 4c

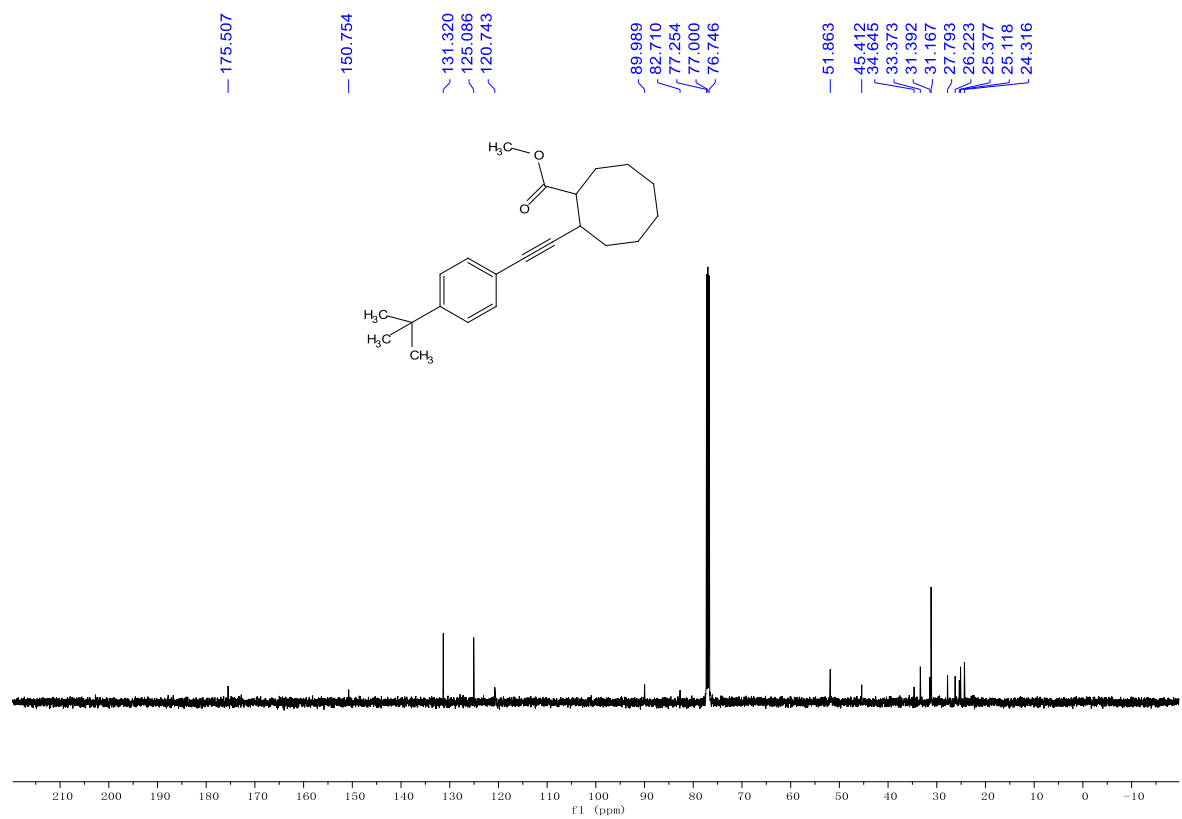

# SUPPORTING INFORMATION

## <sup>1</sup>H NMR (500 MHz, CDCl<sub>3</sub>) spectrum of compound 4d

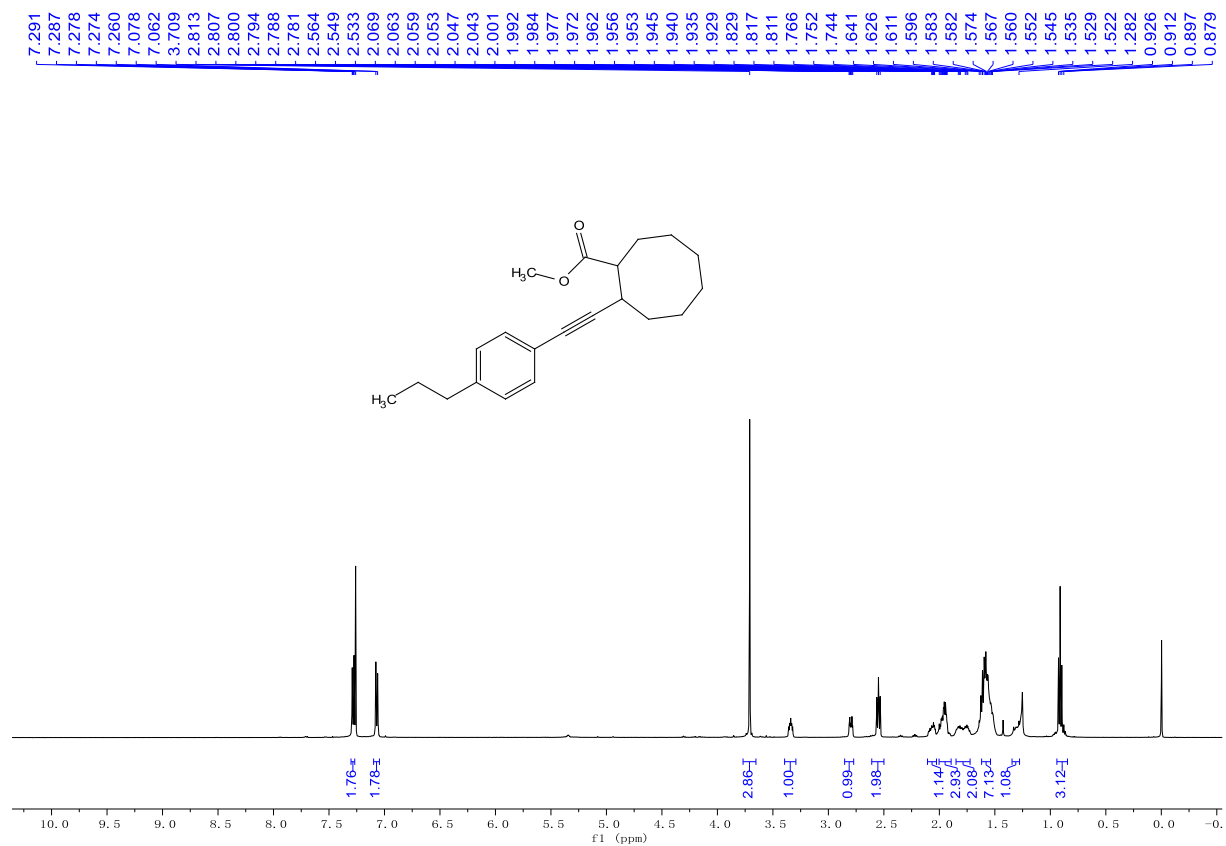

## <sup>13</sup>C NMR (125 MHz, CDCl<sub>3</sub>) spectrum of compound 4d

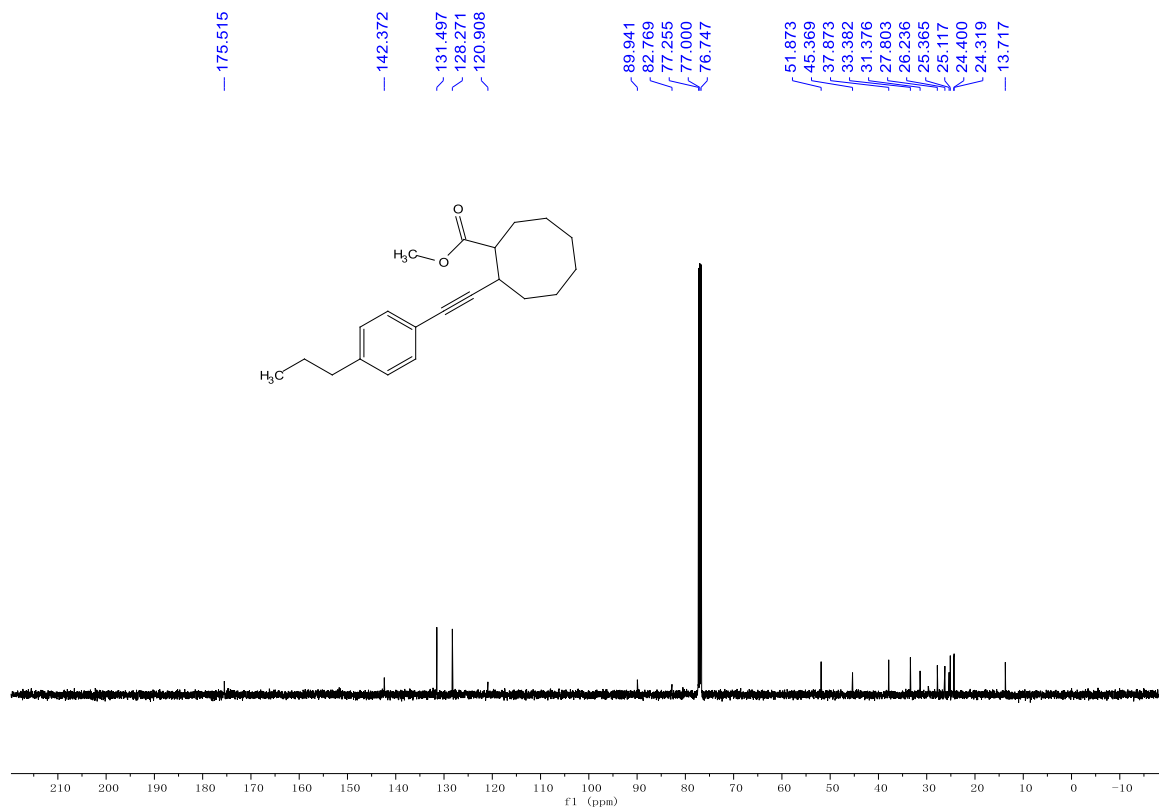

# SUPPORTING INFORMATION

**<sup>1</sup>H NMR (500 MHz, CDCl<sub>3</sub>) spectrum of compound 4e**

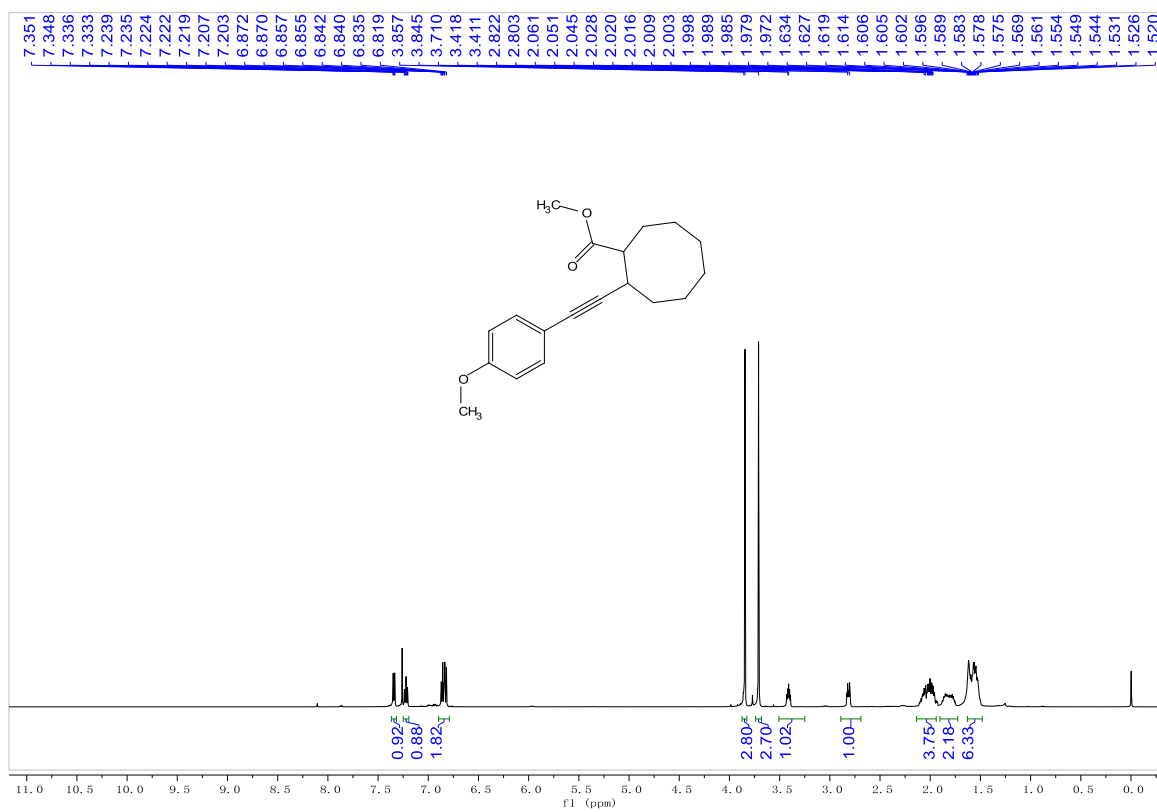

**<sup>13</sup>C NMR (125 MHz, CDCl<sub>3</sub>) spectrum of compound 4e**

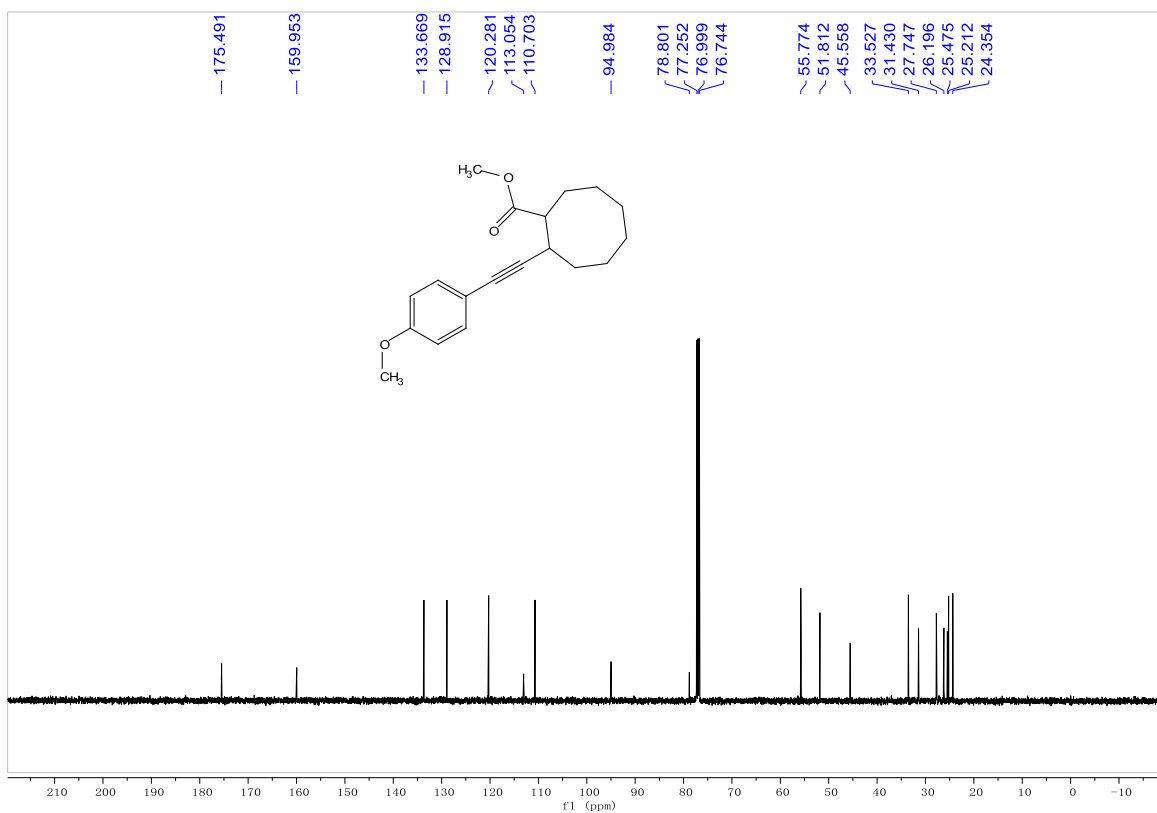

# SUPPORTING INFORMATION

## <sup>1</sup>H NMR (500 MHz, CDCl<sub>3</sub>) spectrum of compound 4f

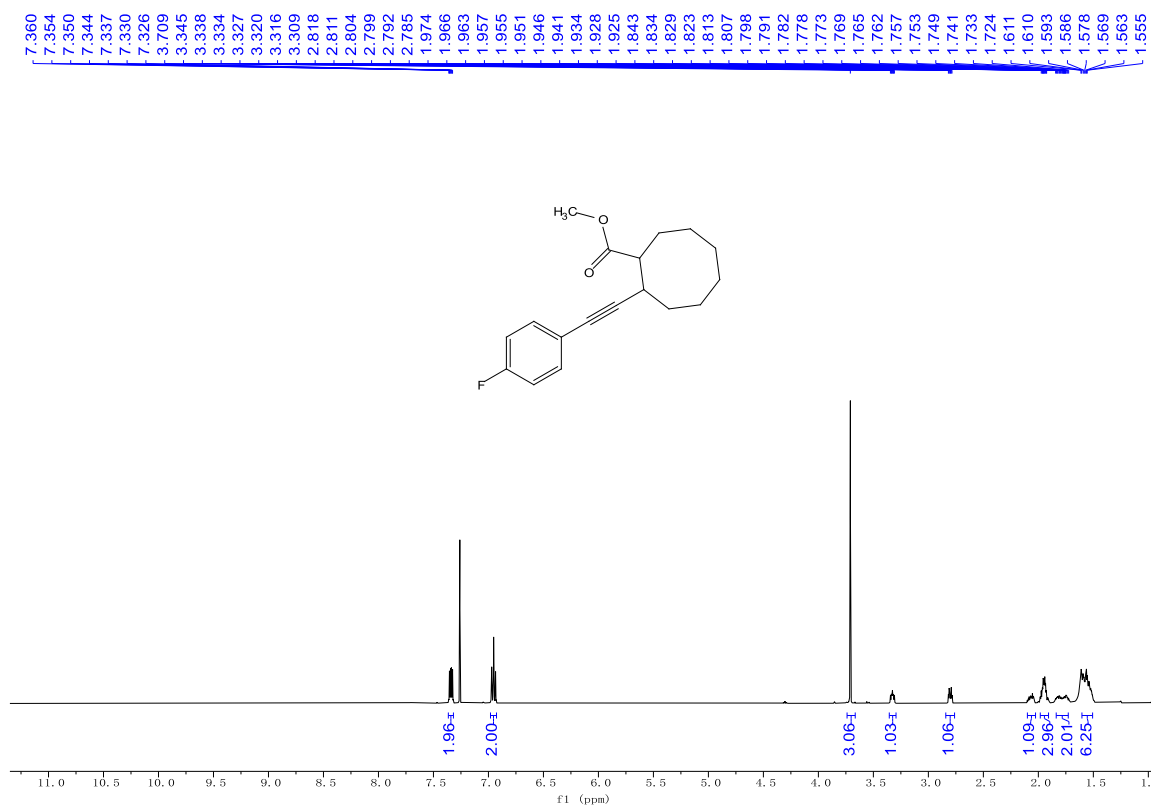

## <sup>13</sup>C NMR (125 MHz, CDCl<sub>3</sub>) spectrum of compound 4f

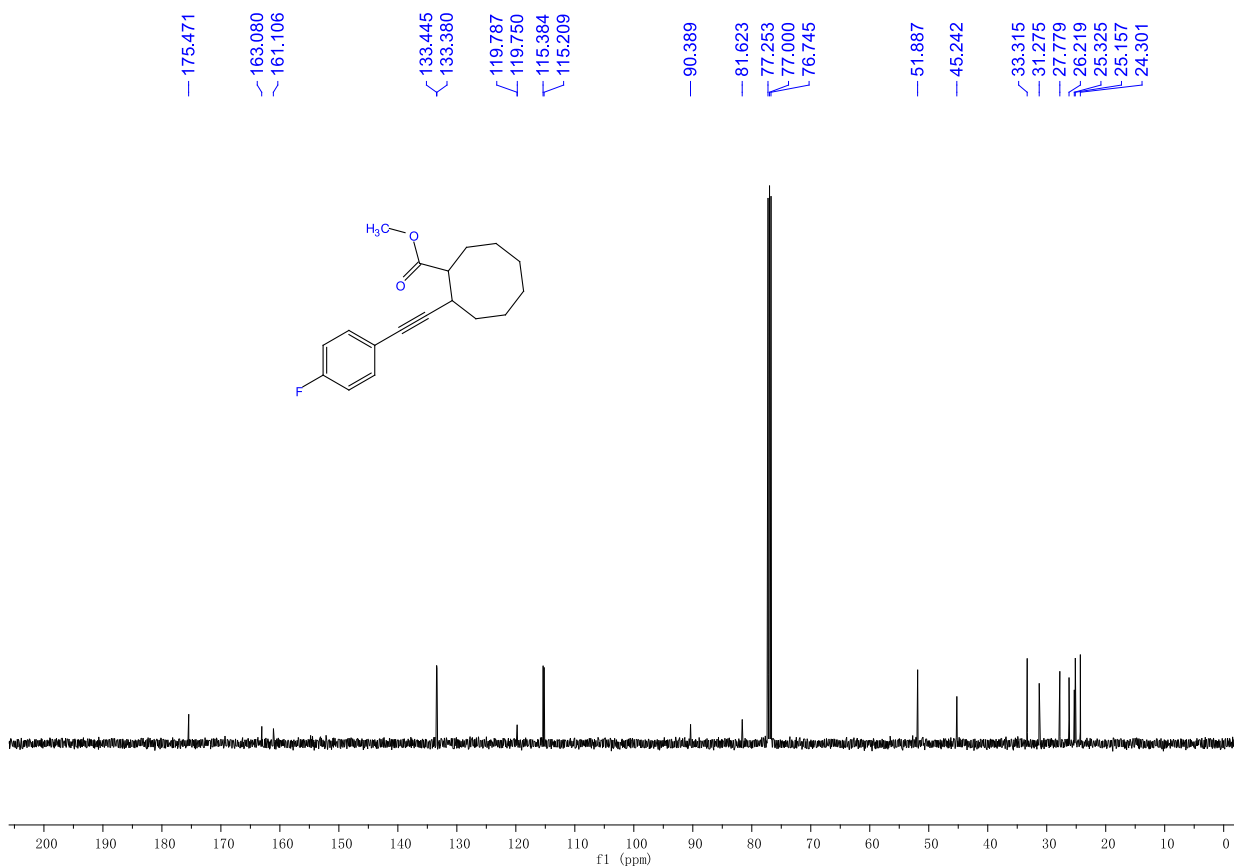

# SUPPORTING INFORMATION

## <sup>1</sup>H NMR (500 MHz, CDCl<sub>3</sub>) spectrum of compound 4g

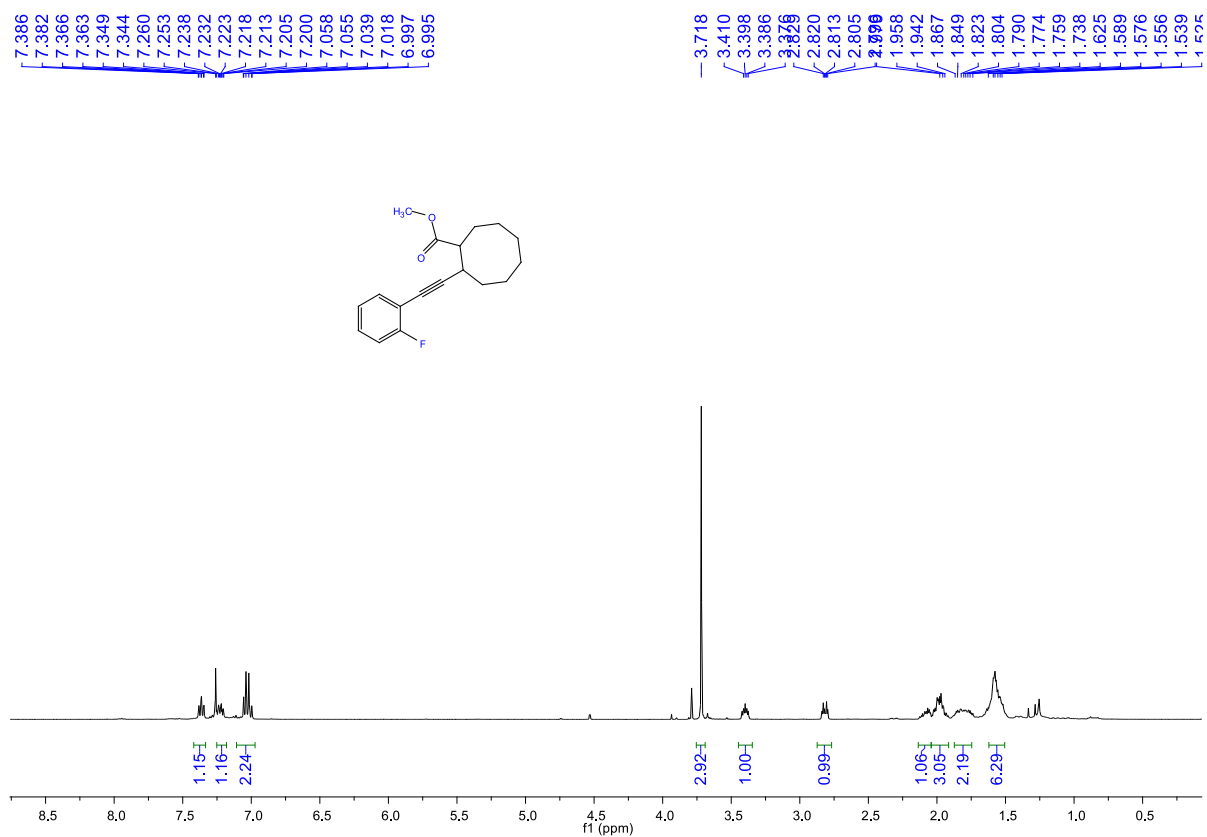

## <sup>13</sup>C NMR (125 MHz, CDCl<sub>3</sub>) spectrum of compound 4g

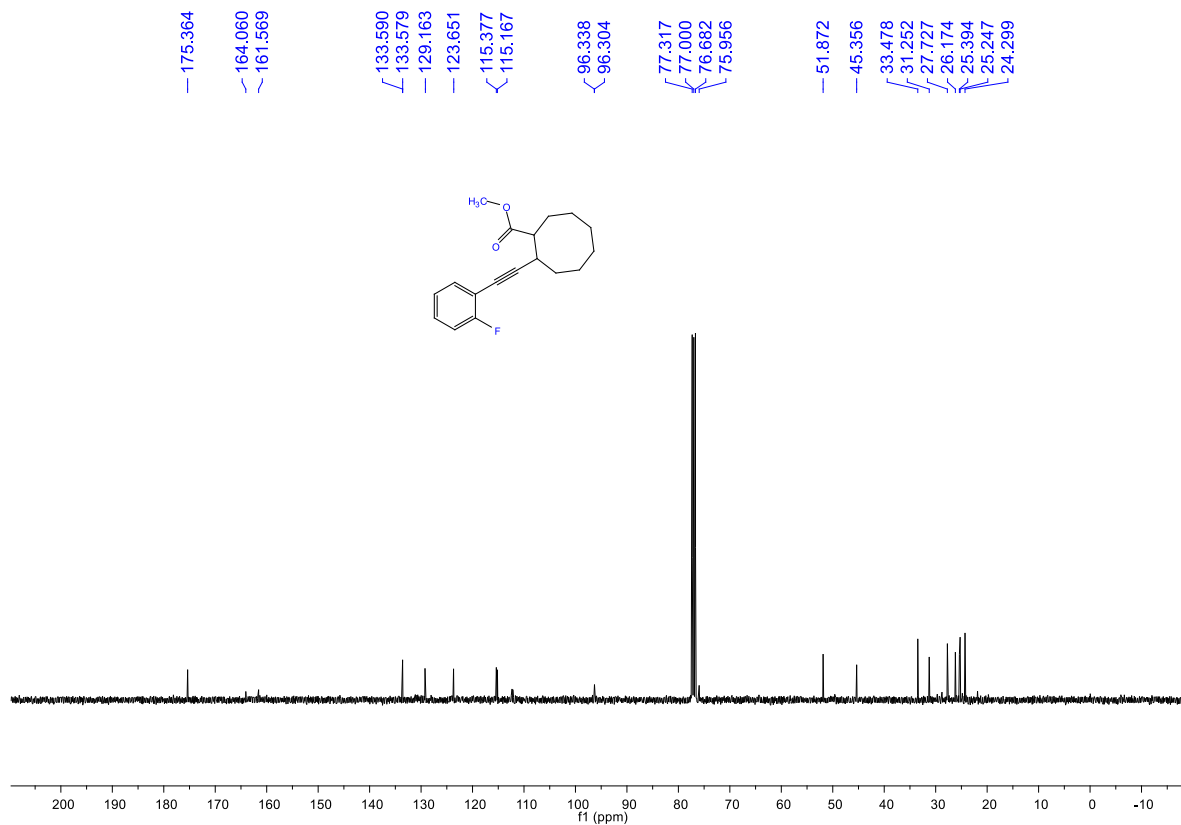

# SUPPORTING INFORMATION

## <sup>1</sup>H NMR (500 MHz, CDCl<sub>3</sub>) spectrum of compound 4h

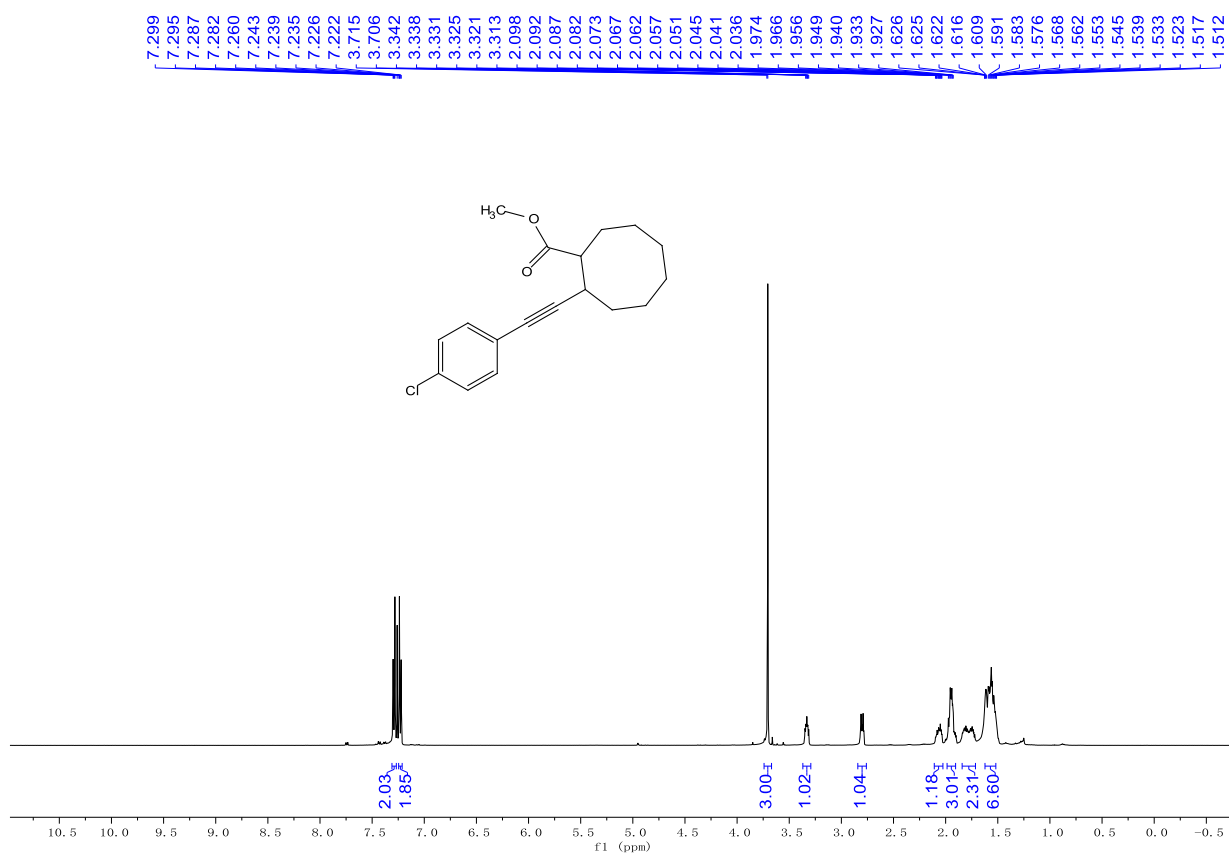

## <sup>13</sup>C NMR (125 MHz, CDCl<sub>3</sub>) spectrum of compound 4h

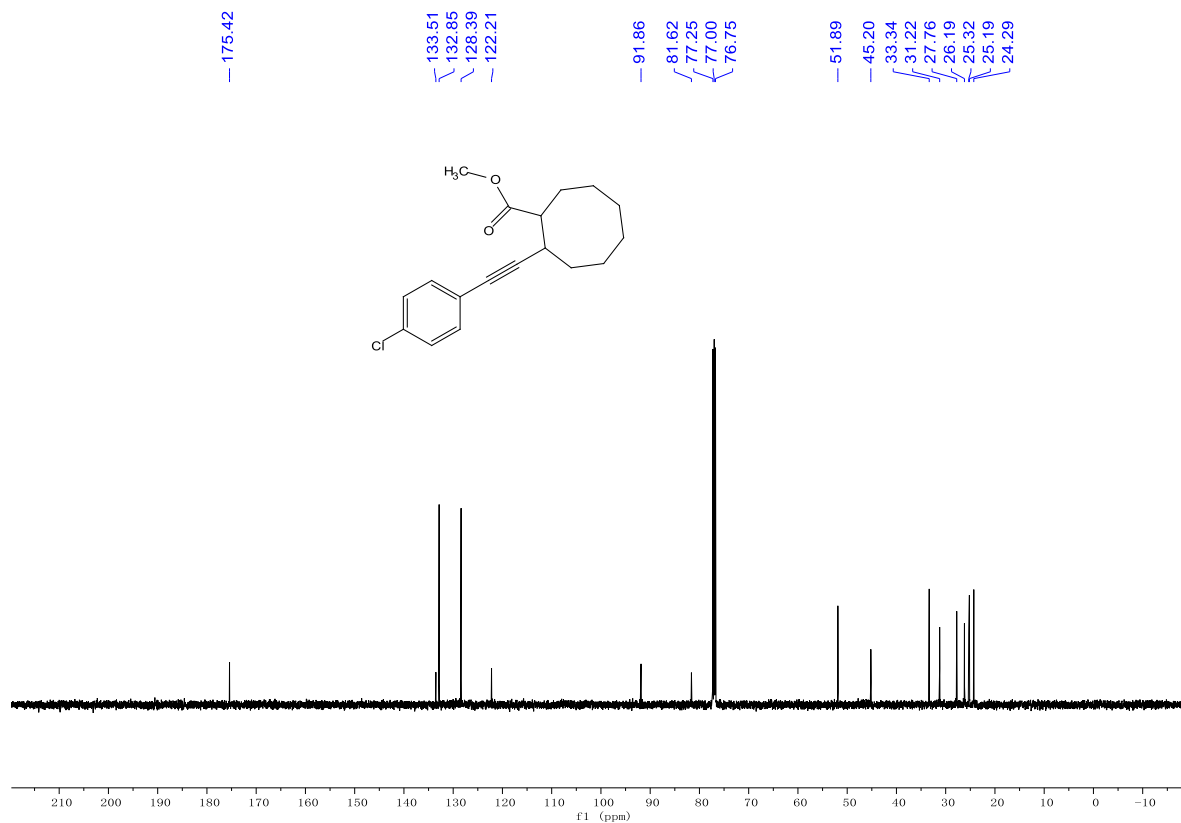



# SUPPORTING INFORMATION

## <sup>1</sup>H NMR (500 MHz, CDCl<sub>3</sub>) spectrum of compound 4i

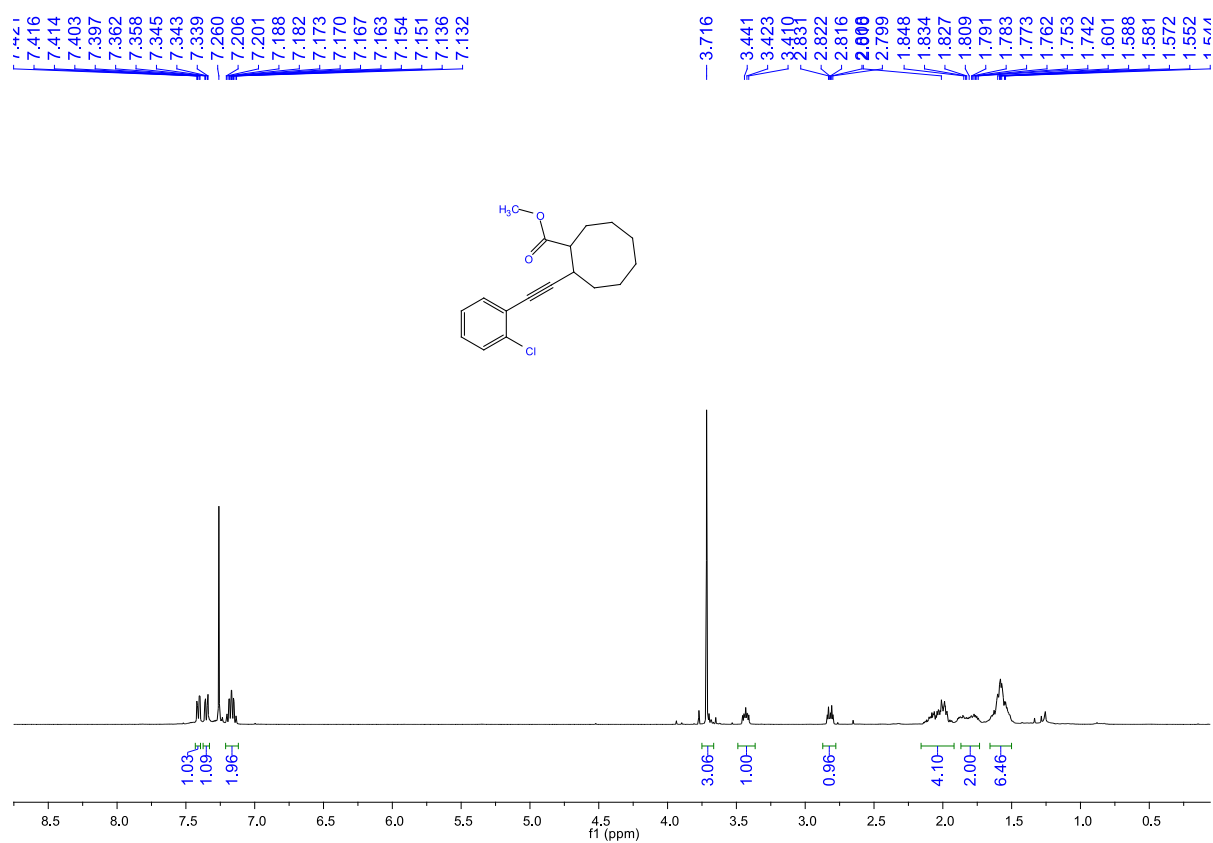

## <sup>13</sup>C NMR (125 MHz, CDCl<sub>3</sub>) spectrum of compound 4i

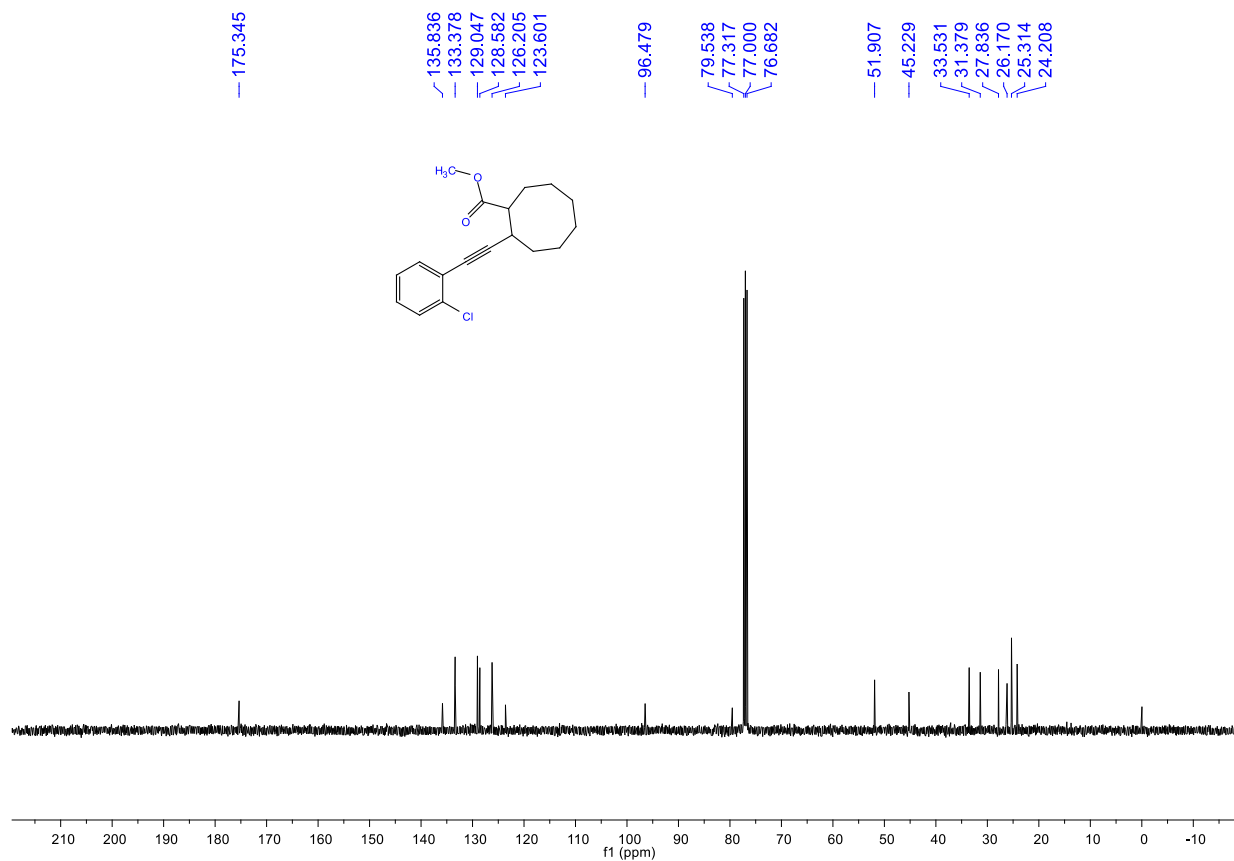

# SUPPORTING INFORMATION

## <sup>1</sup>H NMR (500 MHz, CDCl<sub>3</sub>) spectrum of compound 4j

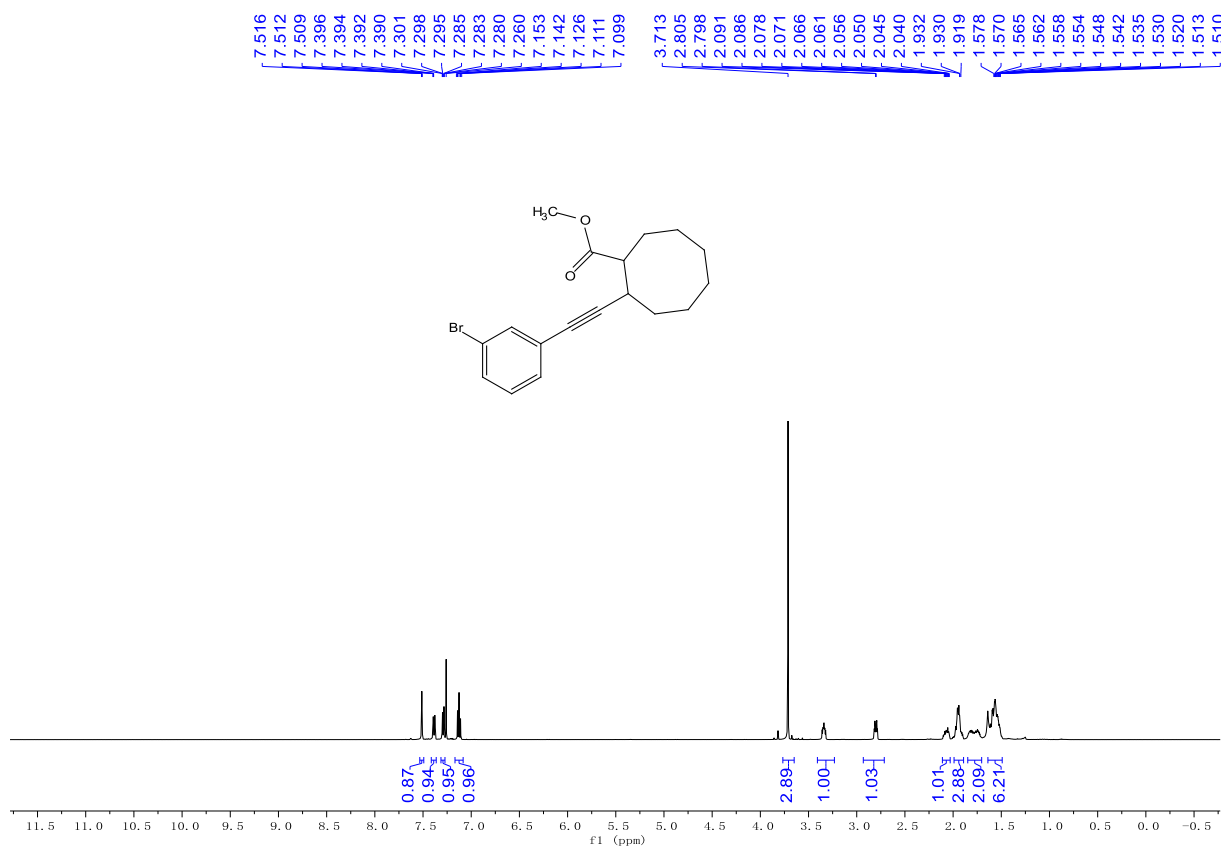

## <sup>13</sup>C NMR (125 MHz, CDCl<sub>3</sub>) spectrum of compound 4j

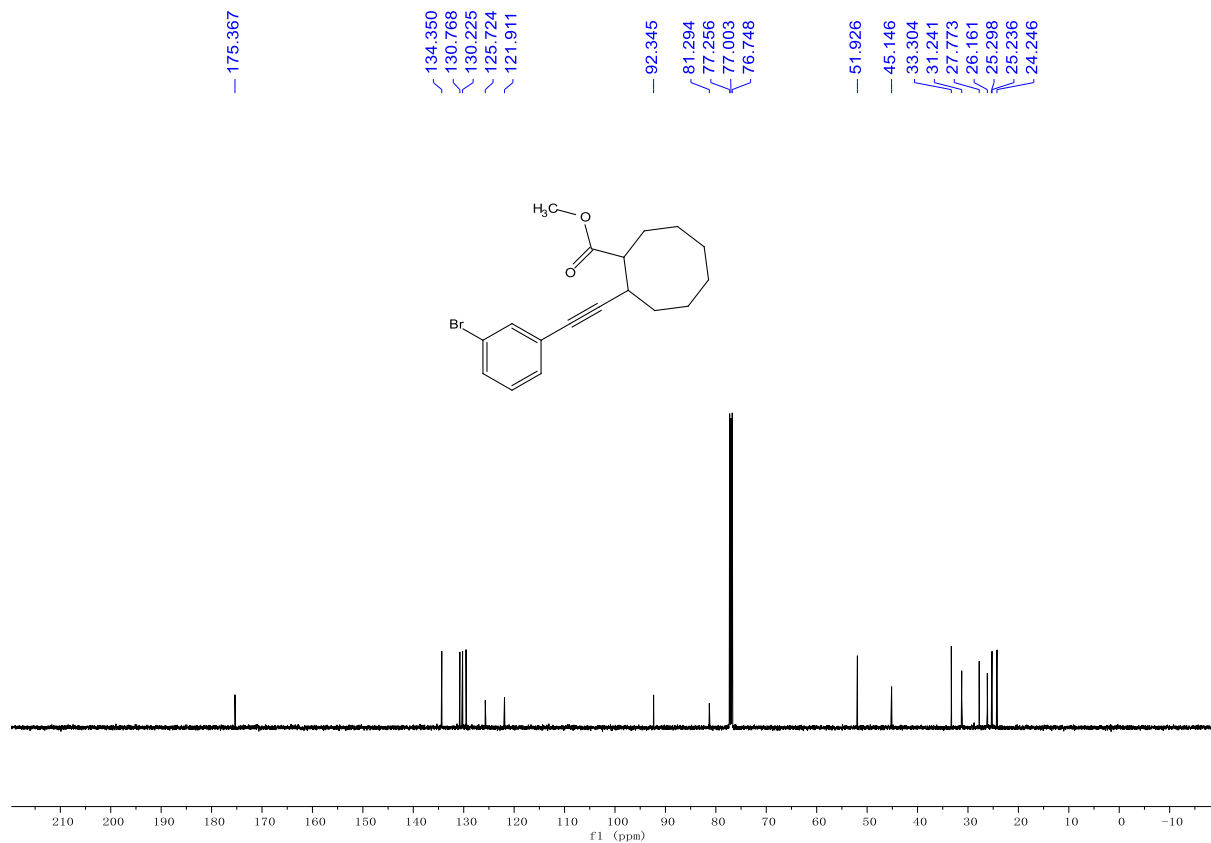

# SUPPORTING INFORMATION

## <sup>1</sup>H NMR (500 MHz, CDCl<sub>3</sub>) spectrum of compound 4k

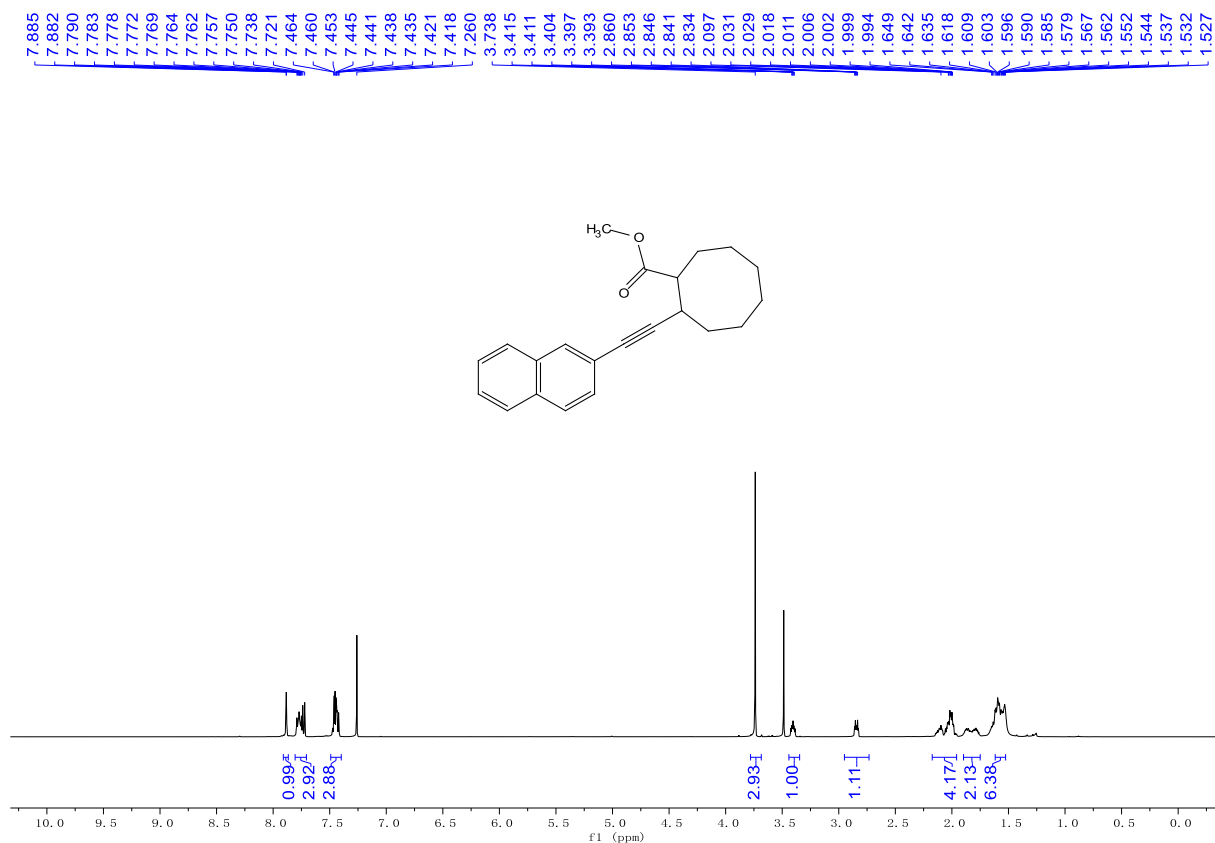

## <sup>13</sup>C NMR (125 MHz, CDCl<sub>3</sub>) spectrum of compound 4k

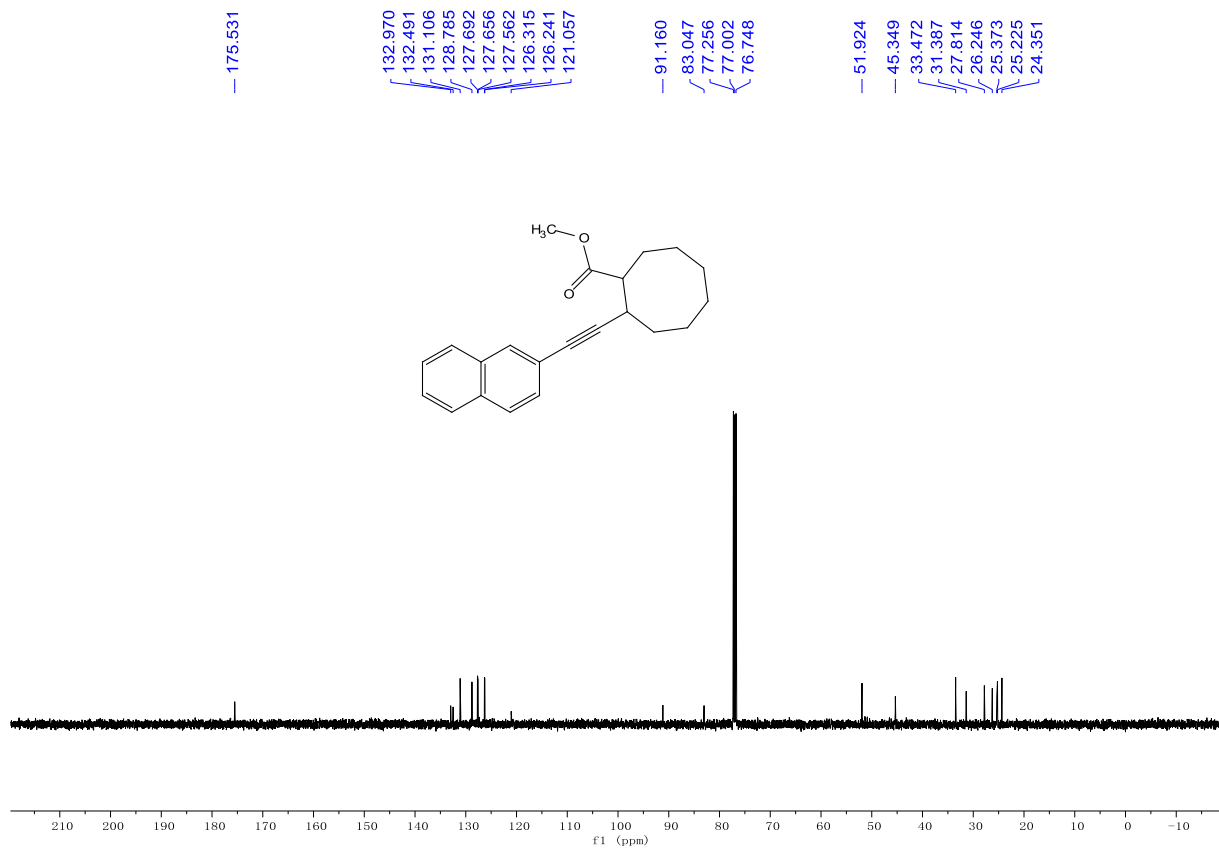

# SUPPORTING INFORMATION

**<sup>1</sup>H NMR (500 MHz, CDCl<sub>3</sub>) spectrum of compound 41**

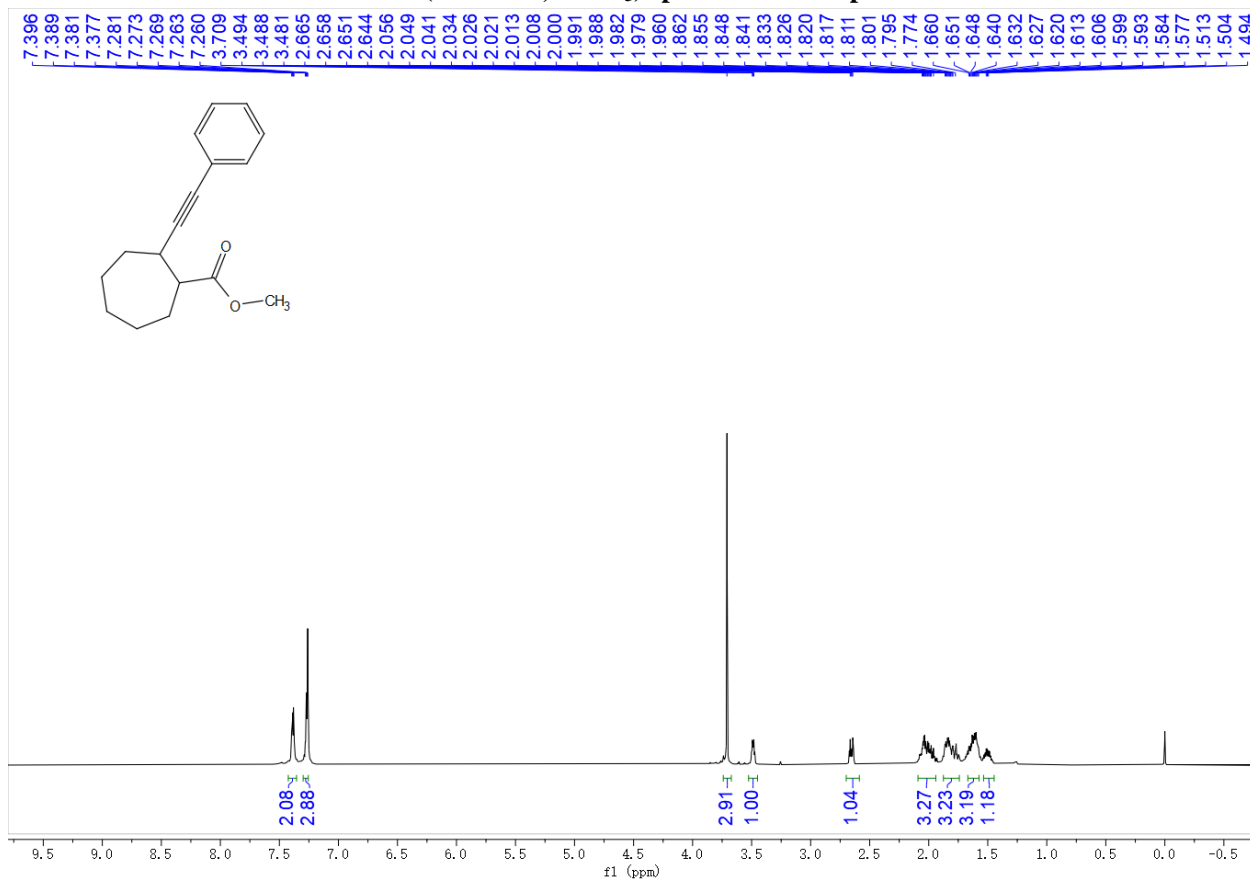

**<sup>13</sup>C NMR (125 MHz, CDCl<sub>3</sub>) spectrum of compound 41**

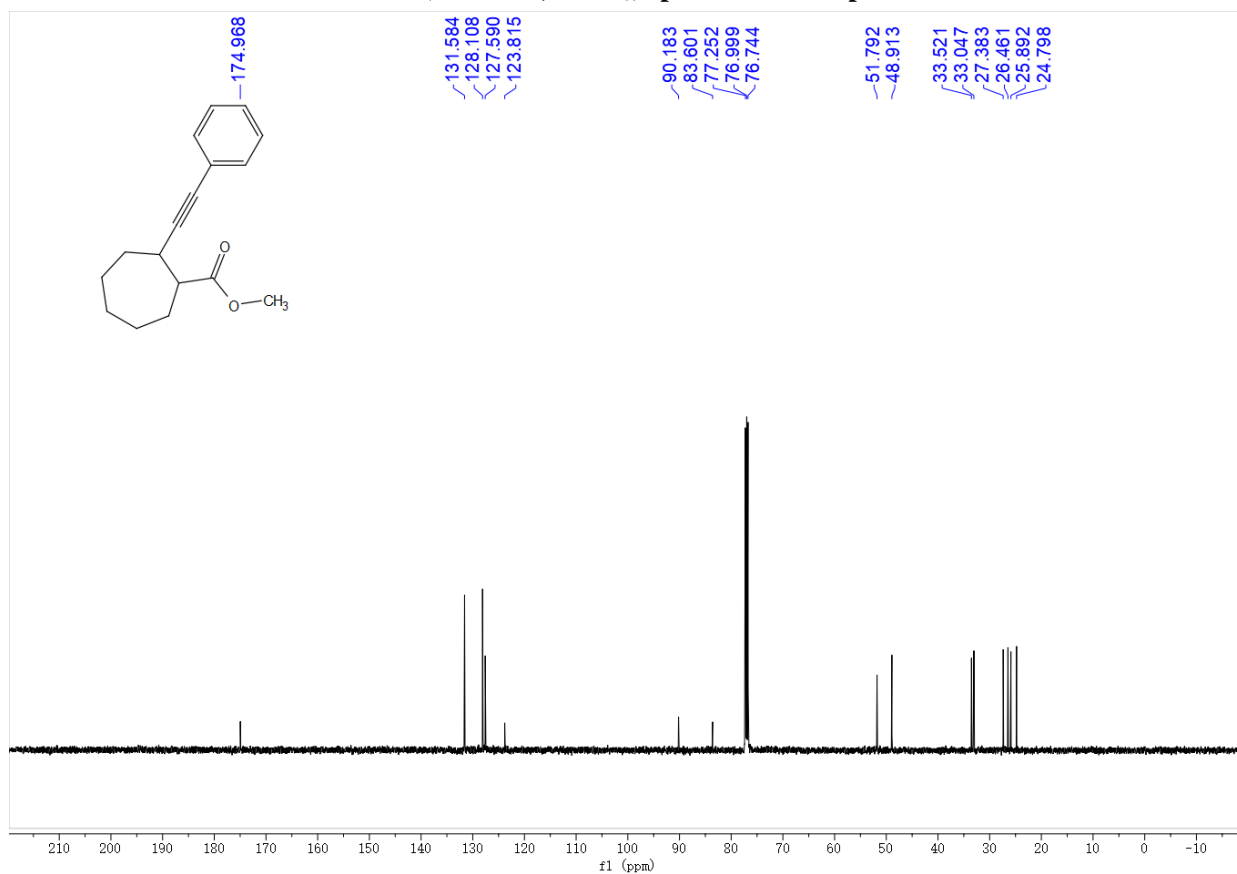

# SUPPORTING INFORMATION

## <sup>1</sup>H NMR (500 MHz, CDCl<sub>3</sub>) spectrum of compound 4m

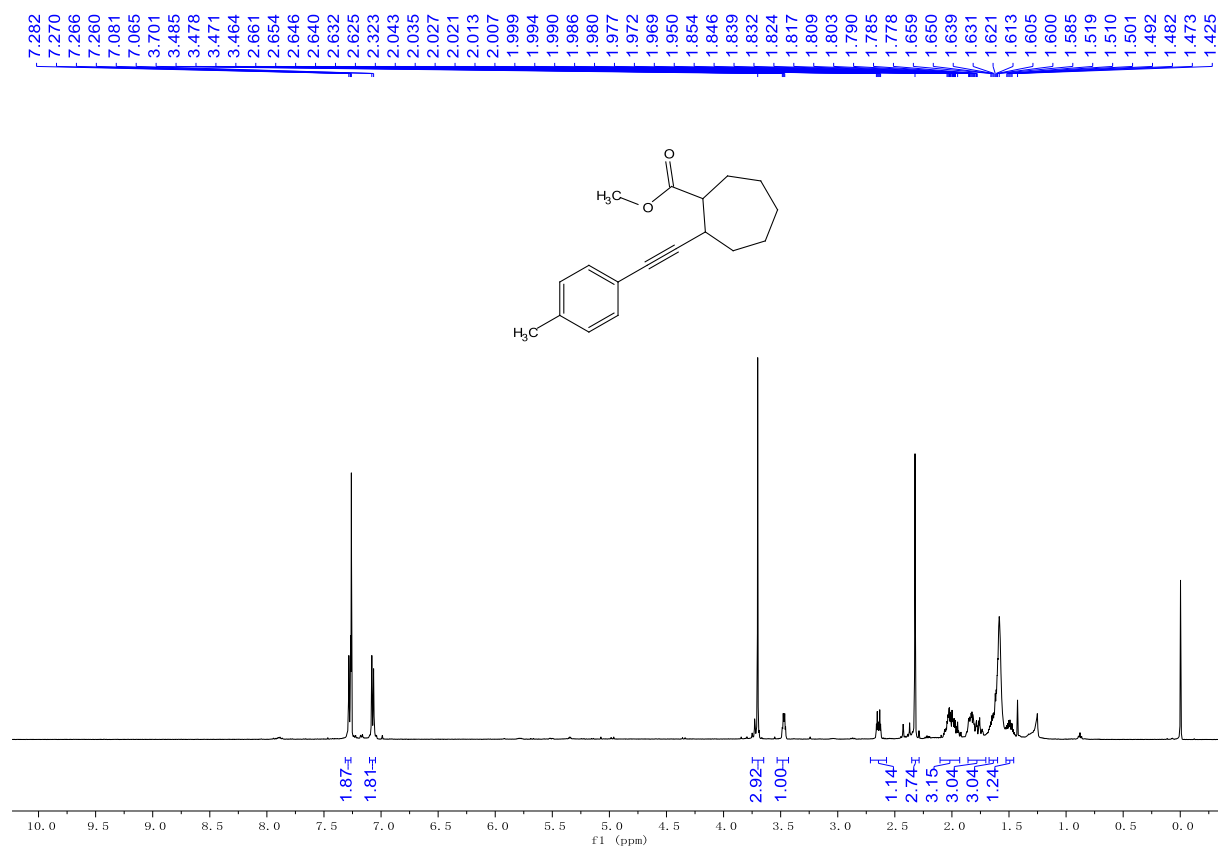

## <sup>13</sup>C NMR (125 MHz, CDCl<sub>3</sub>) spectrum of compound 4m

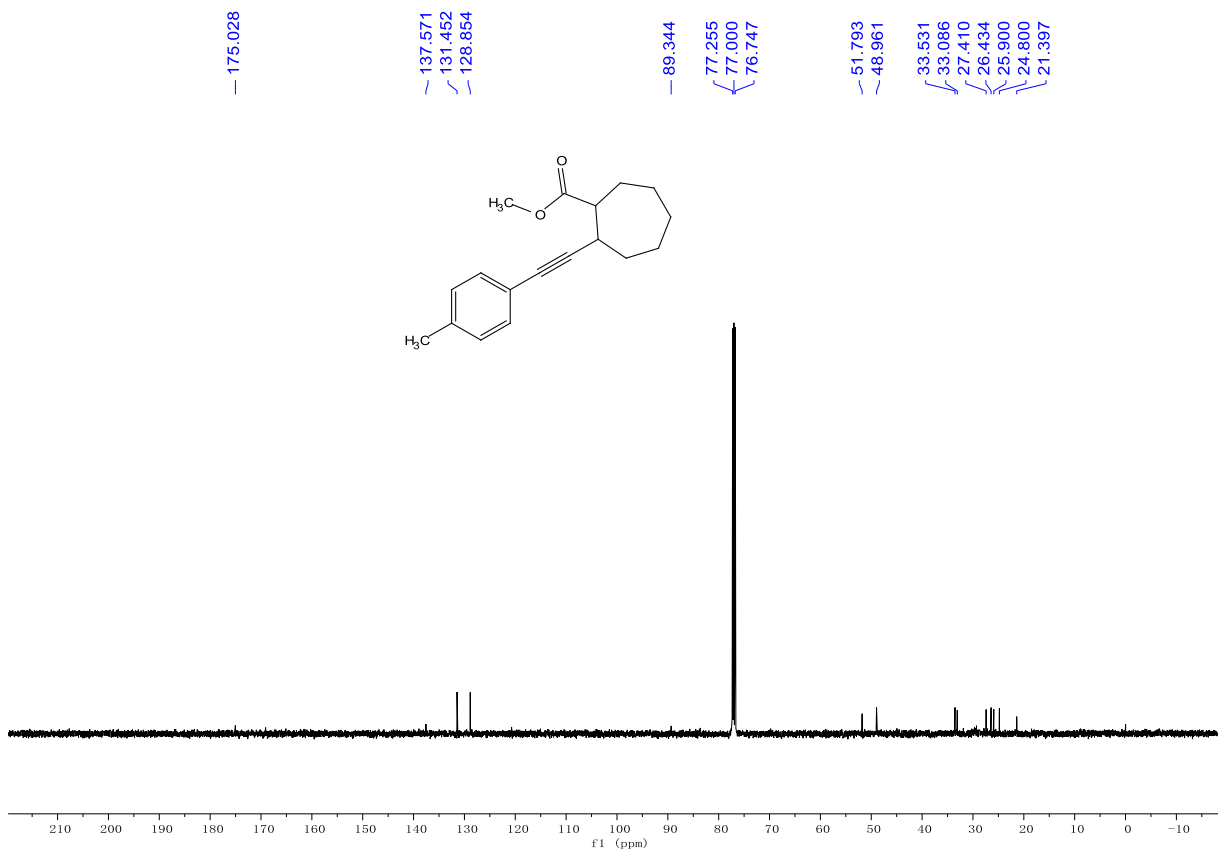

# SUPPORTING INFORMATION

## <sup>1</sup>H NMR (500 MHz, CDCl<sub>3</sub>) spectrum of compound 4n

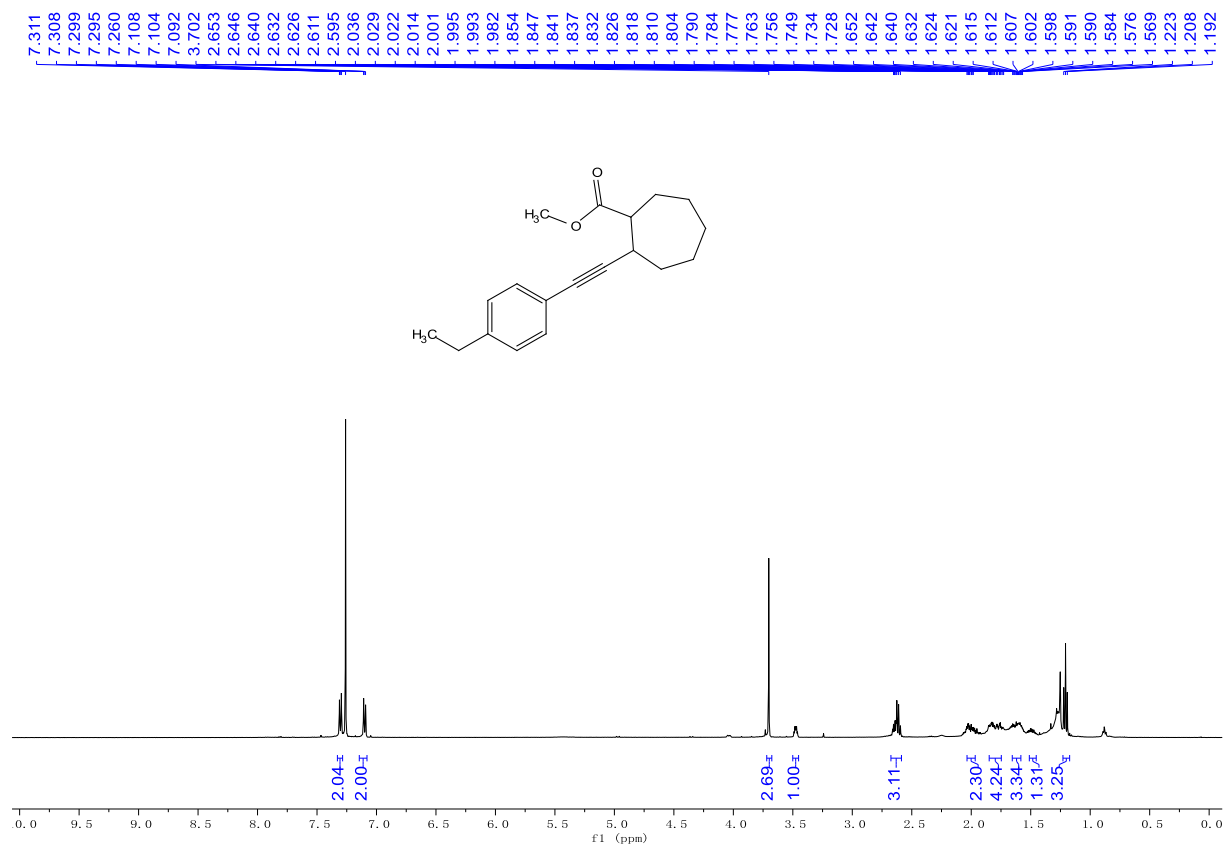

## <sup>13</sup>C NMR (125 MHz, CDCl<sub>3</sub>) spectrum of compound 4n

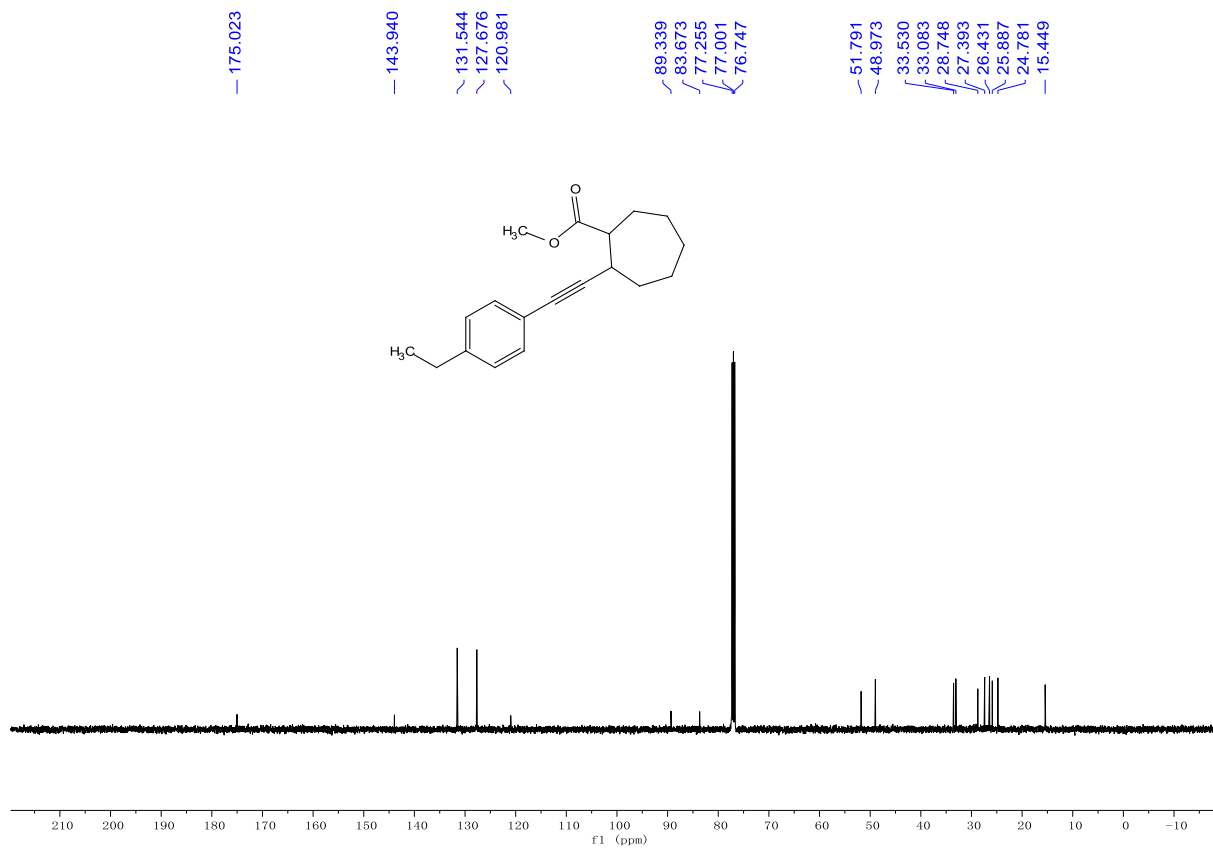

# SUPPORTING INFORMATION

## <sup>1</sup>H NMR (500 MHz, CDCl<sub>3</sub>) spectrum of compound 4o

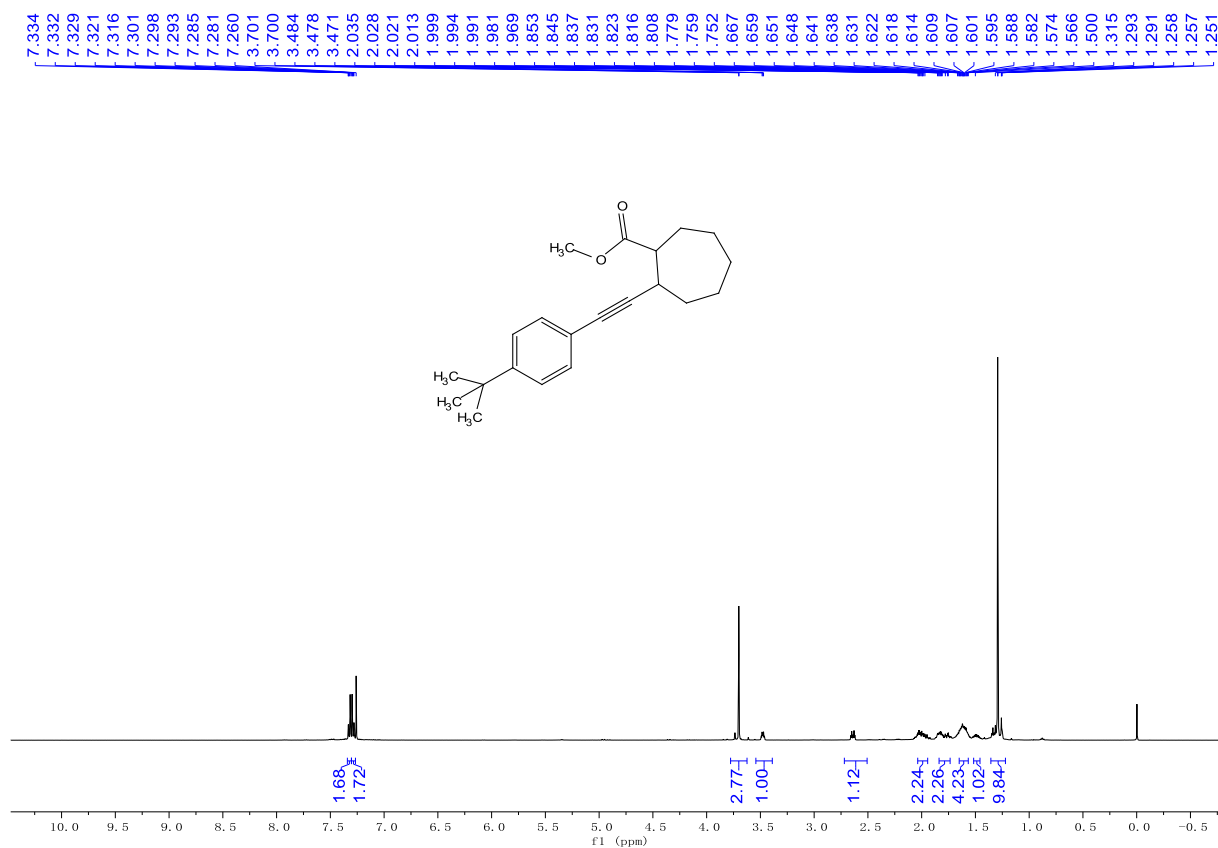

## <sup>13</sup>C NMR (125 MHz, CDCl<sub>3</sub>) spectrum of compound 4o

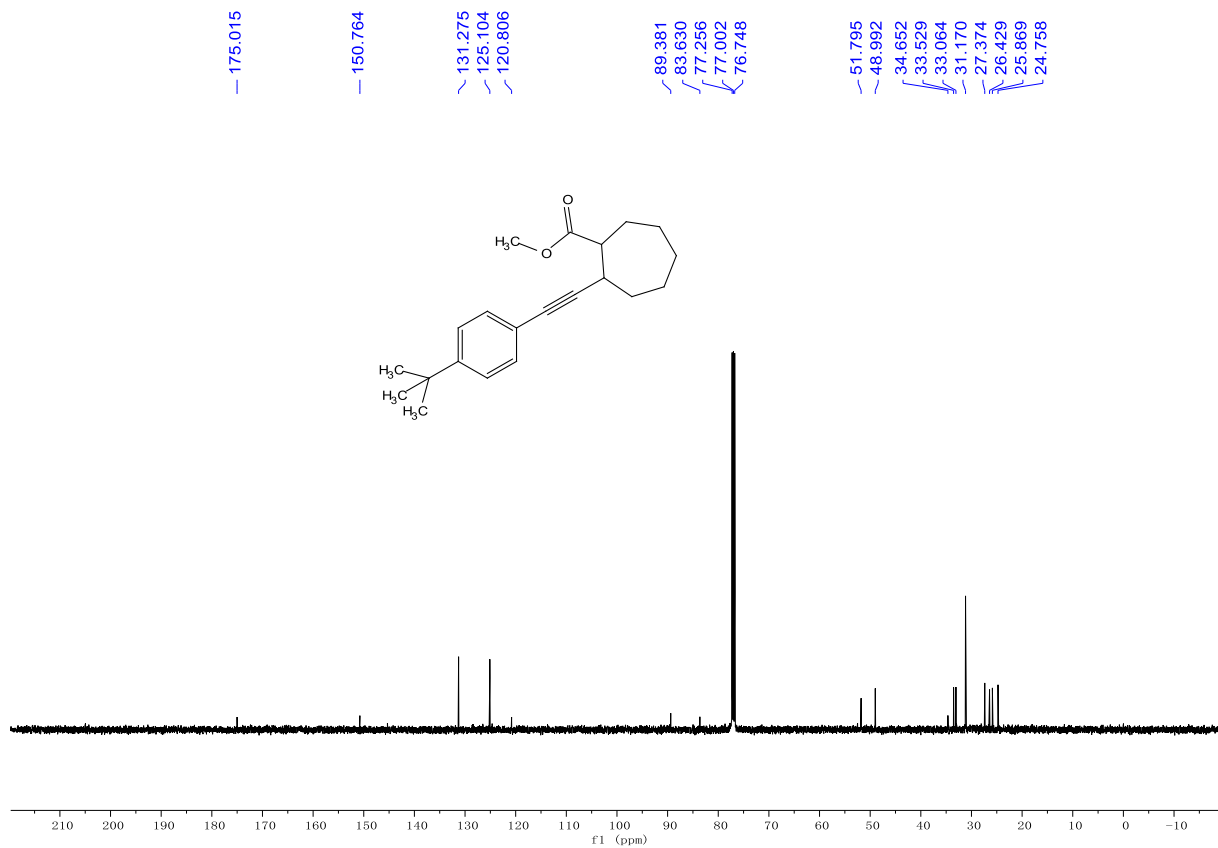

# SUPPORTING INFORMATION

## <sup>1</sup>H NMR (500 MHz, CDCl<sub>3</sub>) spectrum of compound 4p

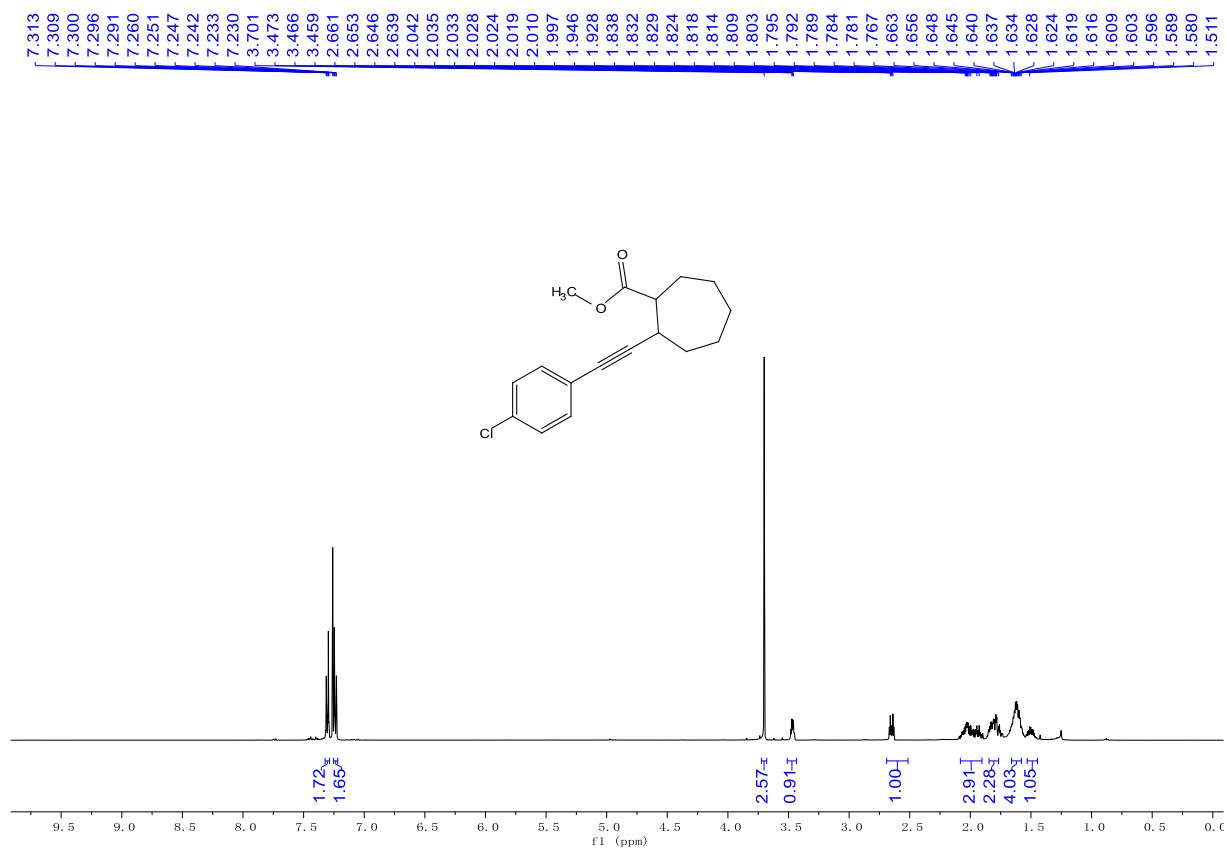

## <sup>13</sup>C NMR (125 MHz, CDCl<sub>3</sub>) spectrum of compound 4p

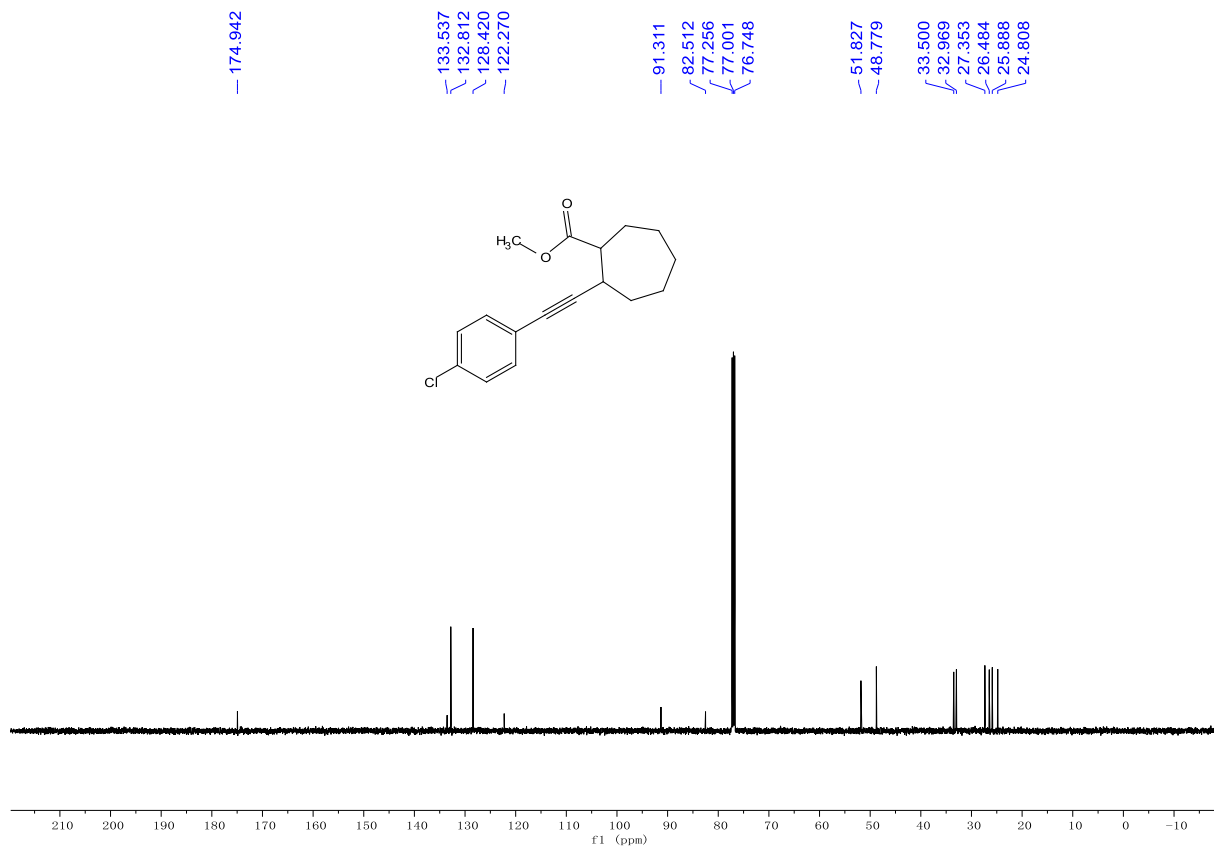



# SUPPORTING INFORMATION

## <sup>1</sup>H NMR (500 MHz, CDCl<sub>3</sub>) spectrum of compound 4q

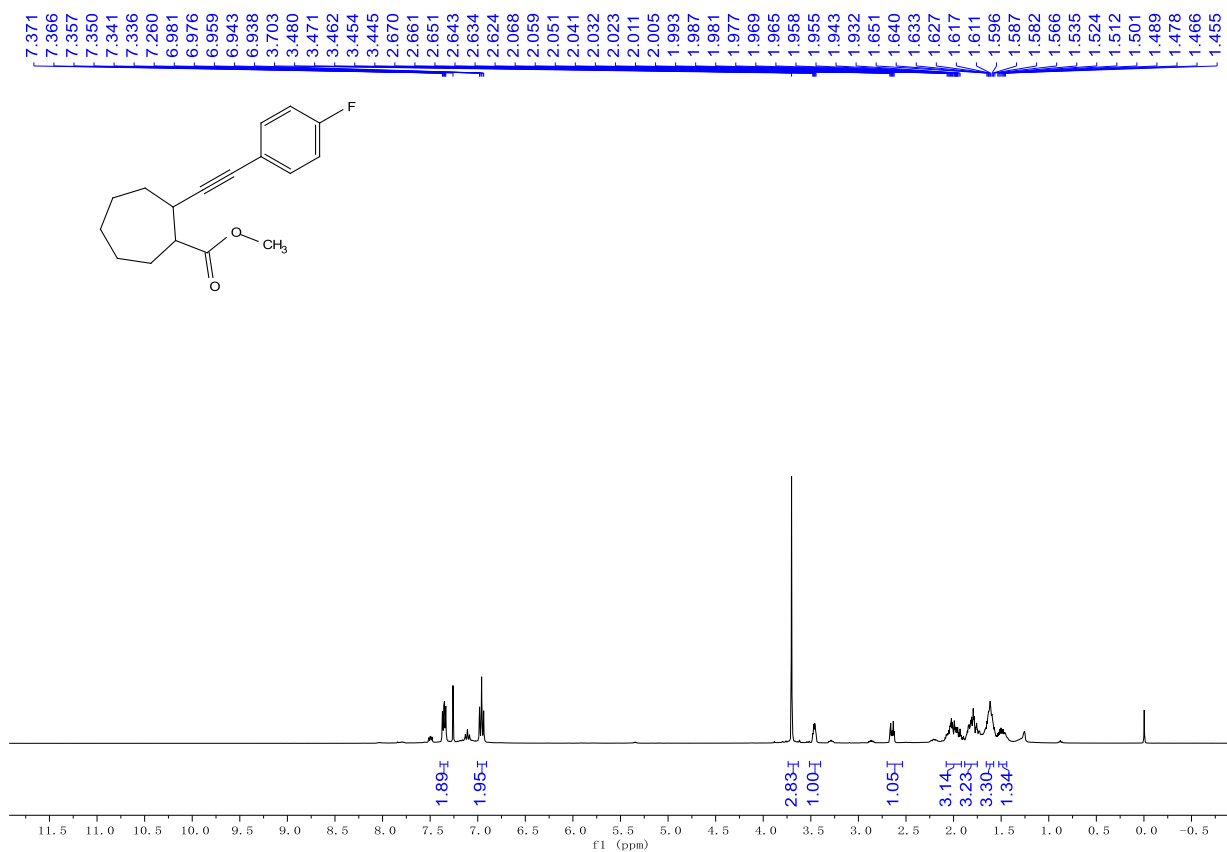

## <sup>13</sup>C NMR (125 MHz, CDCl<sub>3</sub>) spectrum of compound 4q

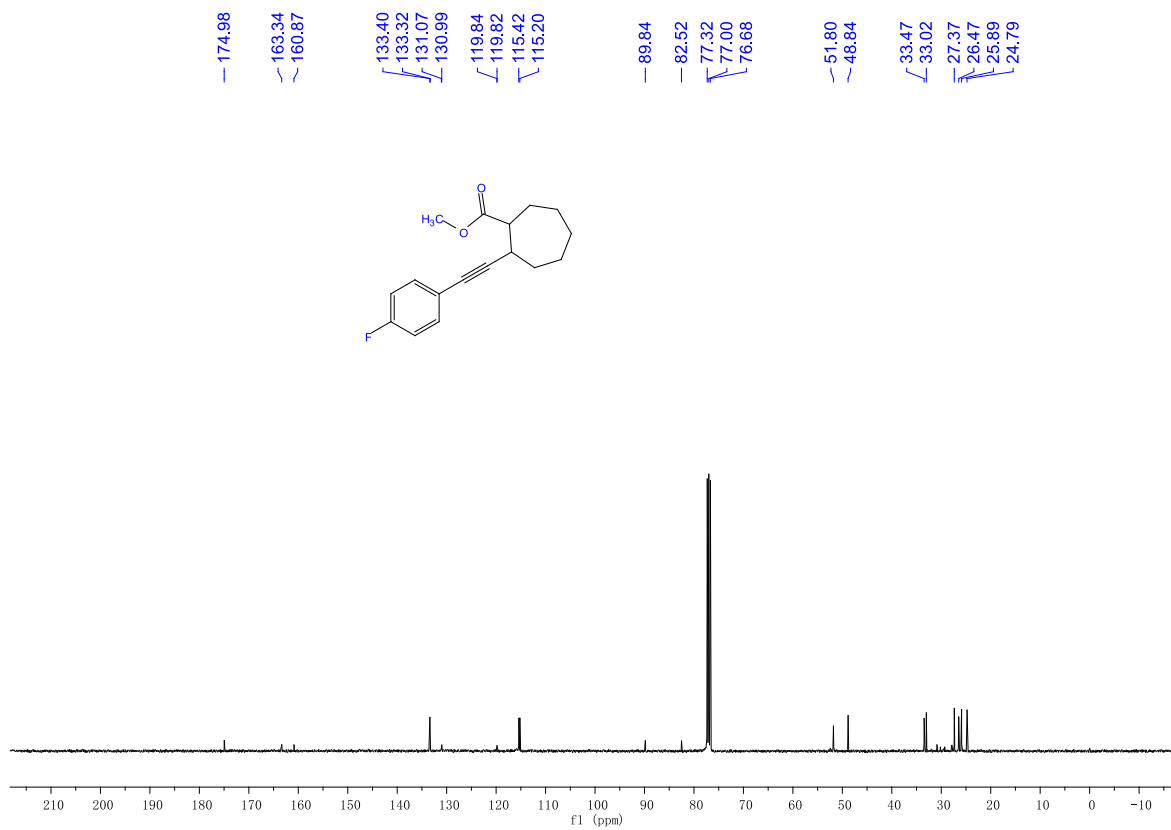

# SUPPORTING INFORMATION

## <sup>1</sup>H NMR (500 MHz, CDCl<sub>3</sub>) spectrum of compound 4r

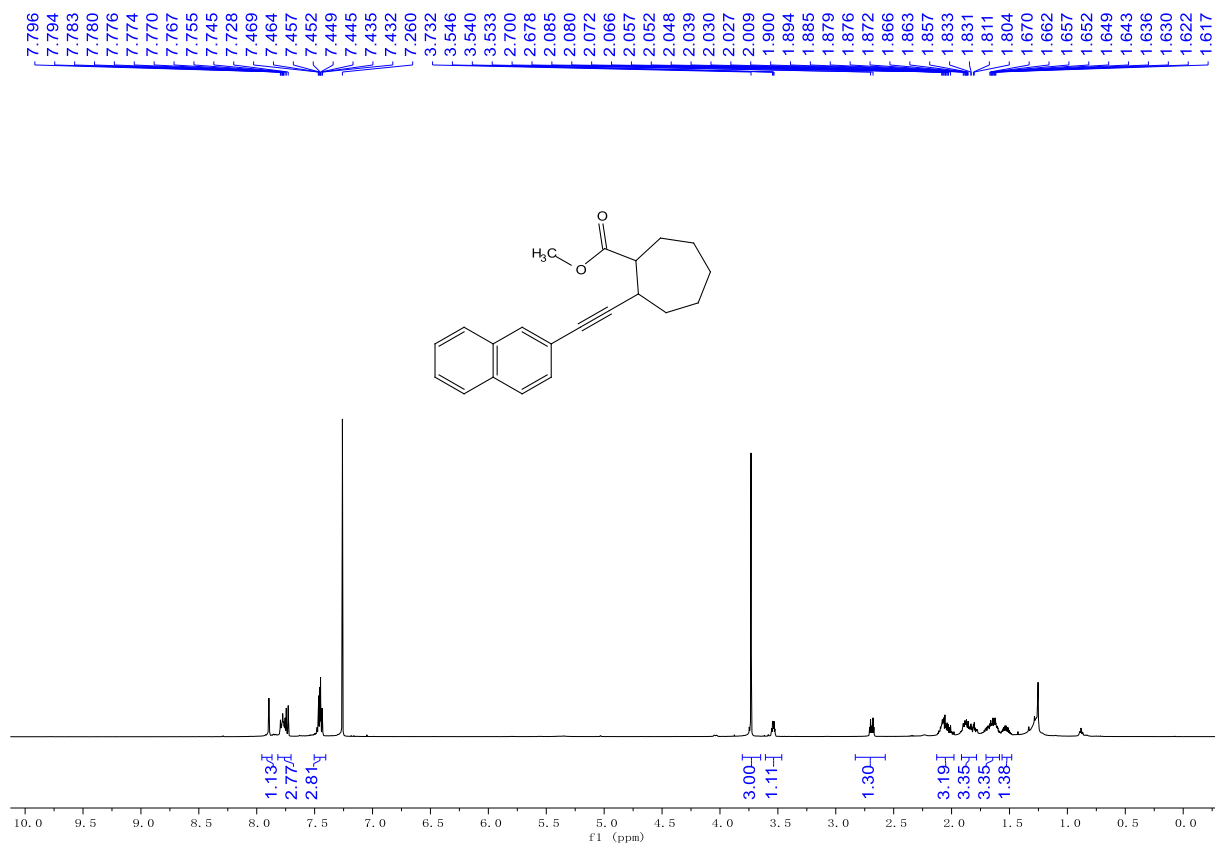

## <sup>13</sup>C NMR (125 MHz, CDCl<sub>3</sub>) spectrum of compound 4r

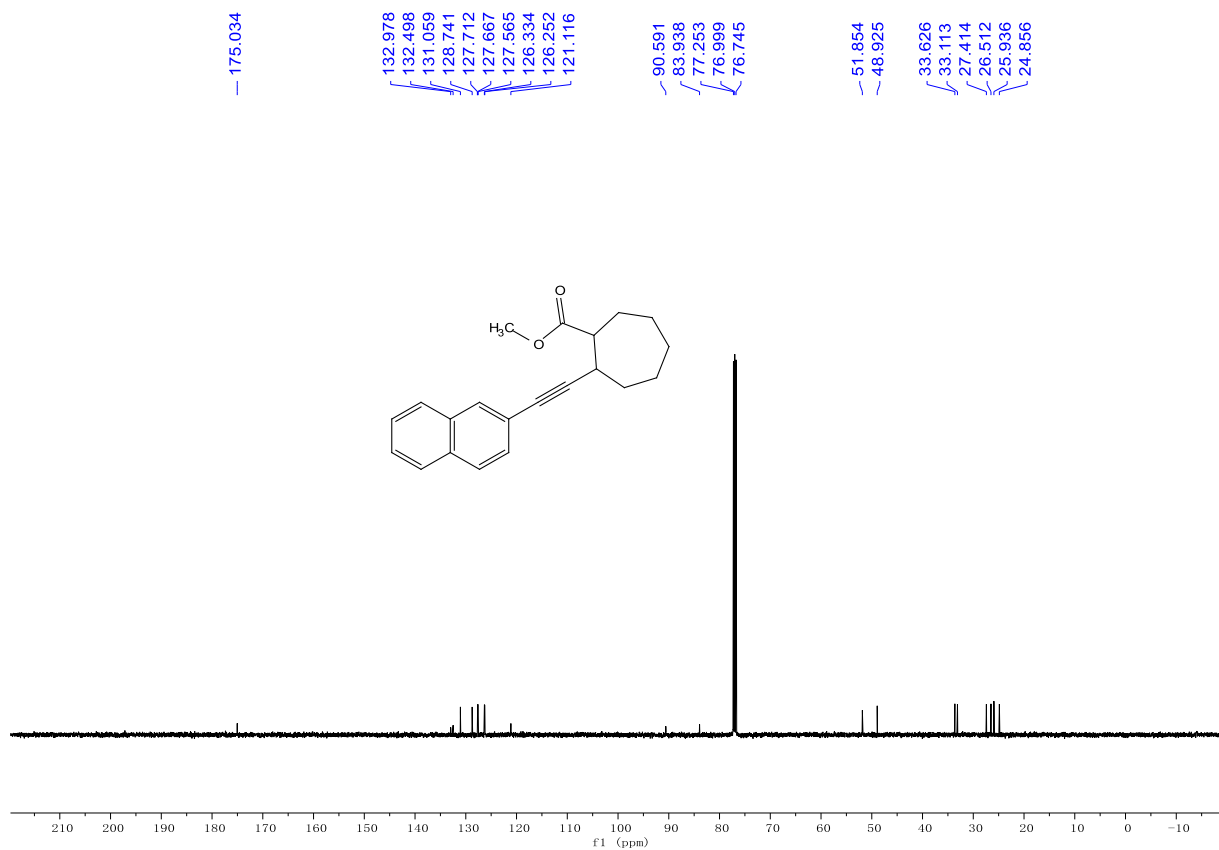

# SUPPORTING INFORMATION

## <sup>1</sup>H NMR (400 MHz, CDCl<sub>3</sub>) spectrum of compound 4s

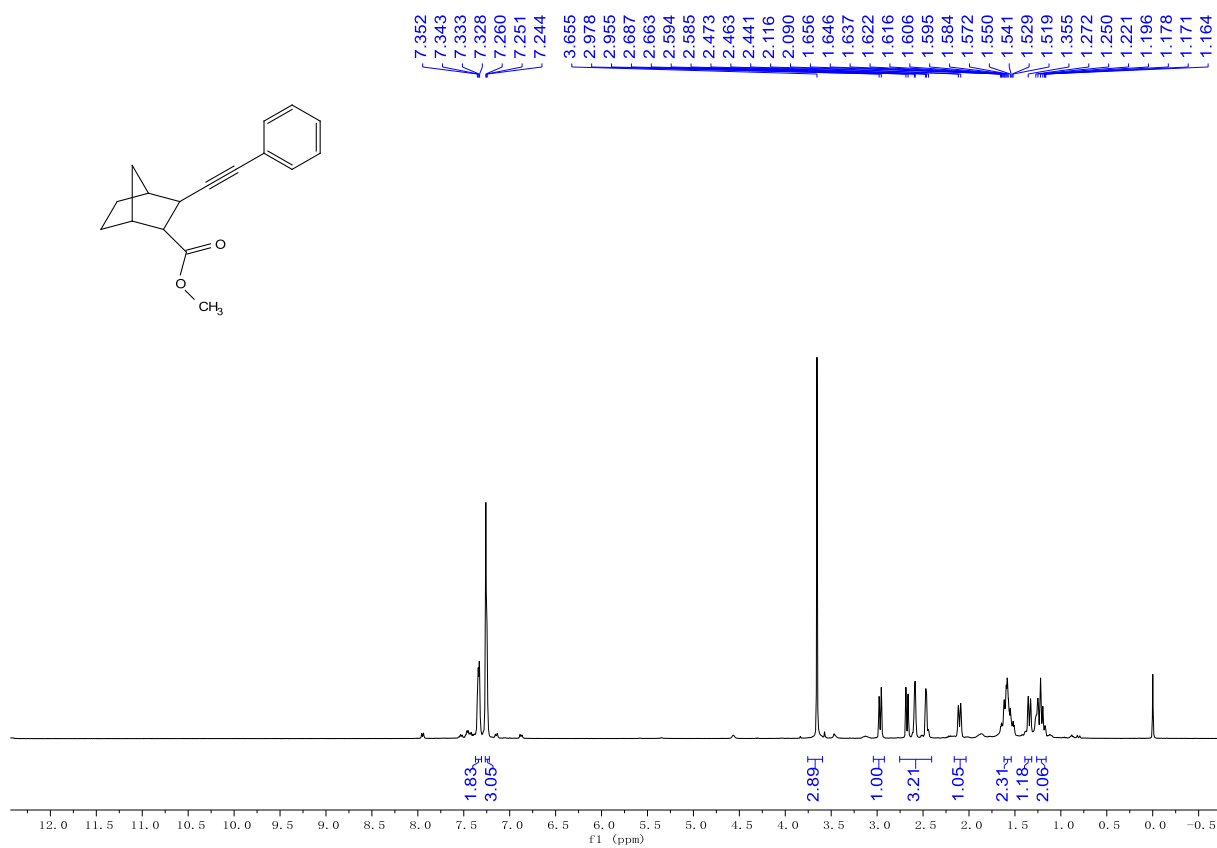

## <sup>13</sup>C NMR (100 MHz, CDCl<sub>3</sub>) spectrum of compound 4s

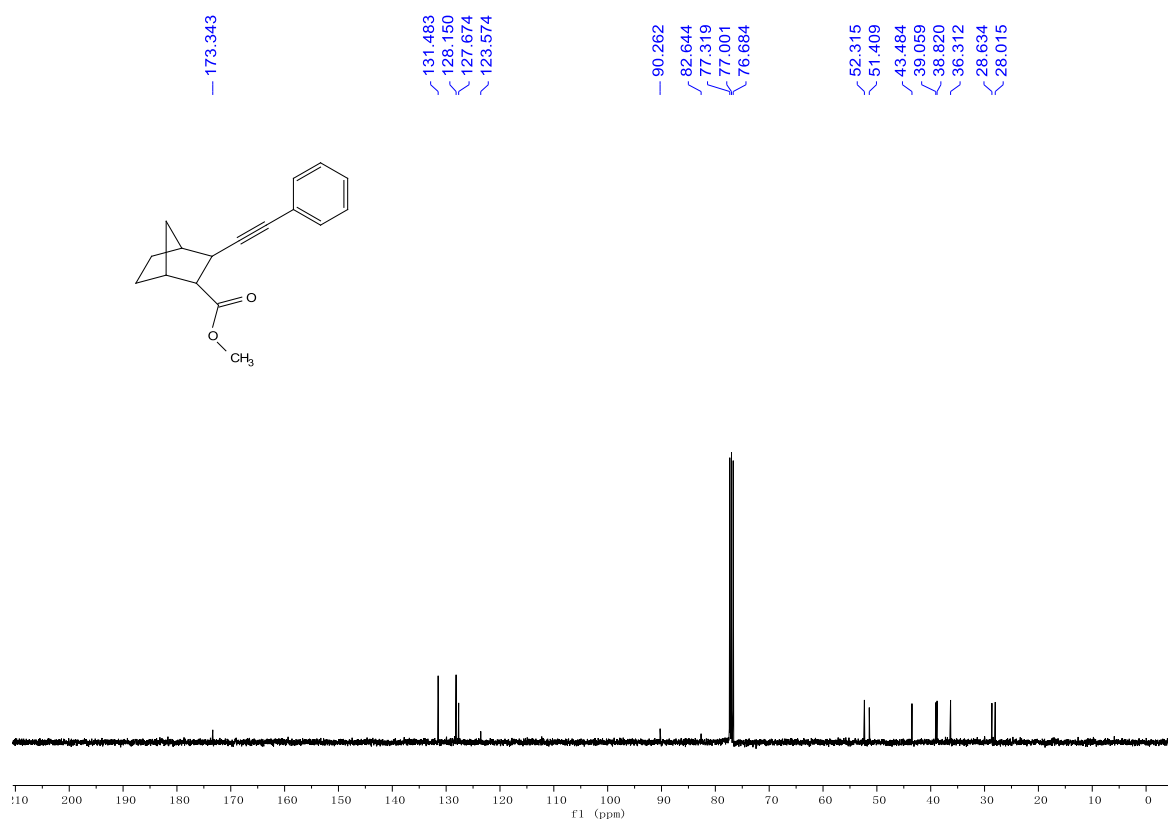

# SUPPORTING INFORMATION

## <sup>1</sup>H NMR (500 MHz, CDCl<sub>3</sub>) spectrum of compound 4t

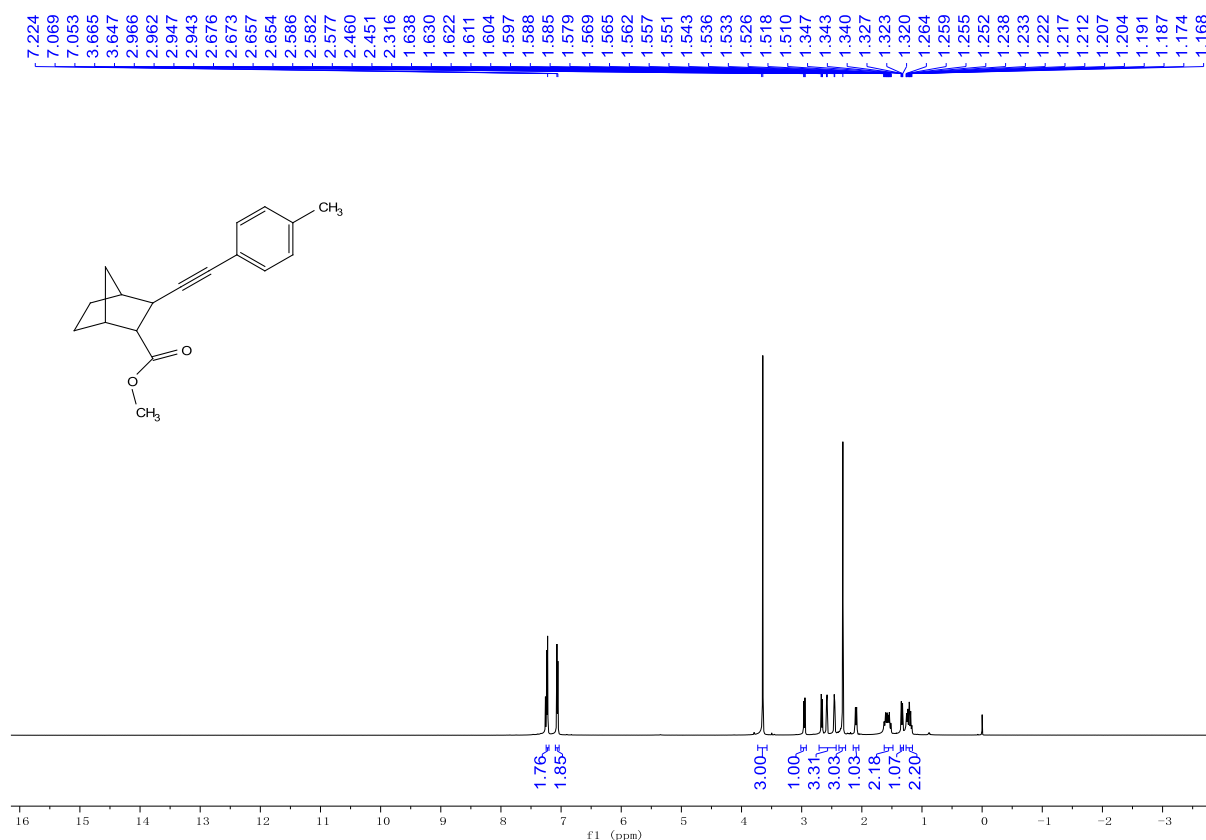

## <sup>13</sup>C NMR (125 MHz, CD Cl<sub>3</sub>) spectrum of compound 4t

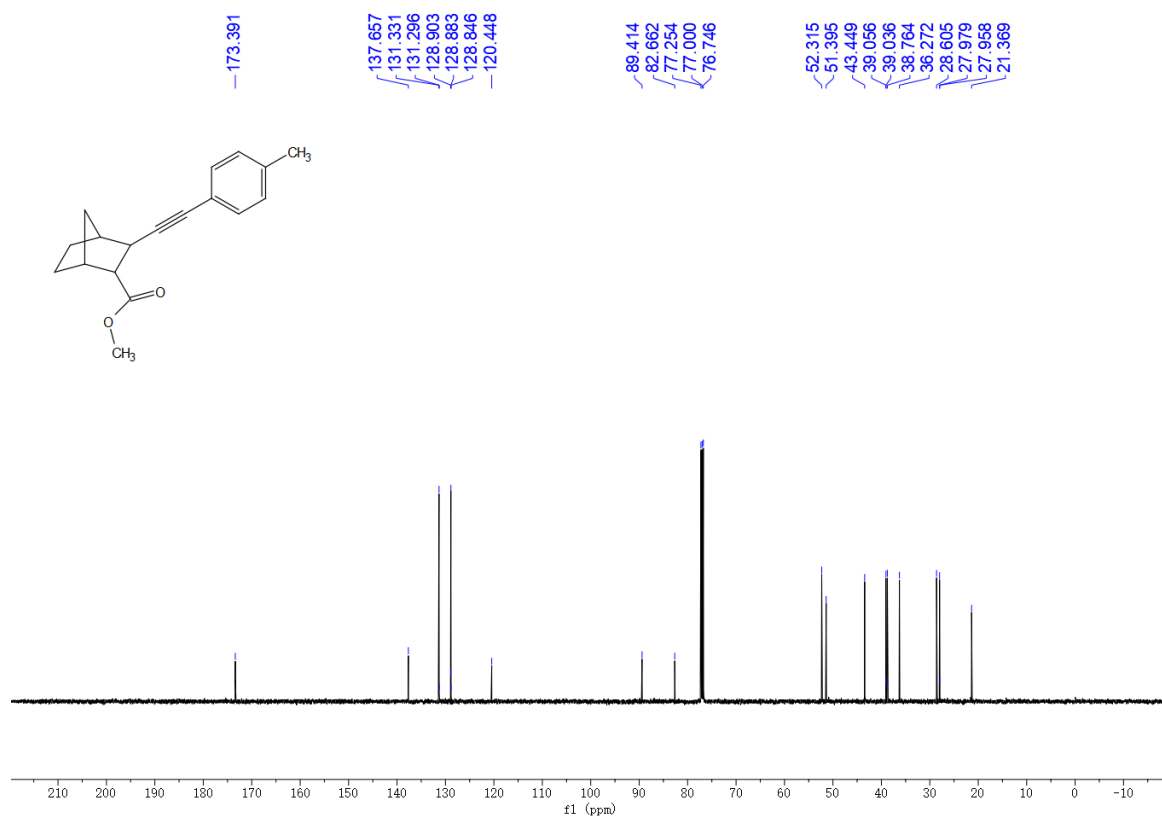

# SUPPORTING INFORMATION

## <sup>1</sup>H NMR (500 MHz, CDCl<sub>3</sub>) spectrum of compound 4u

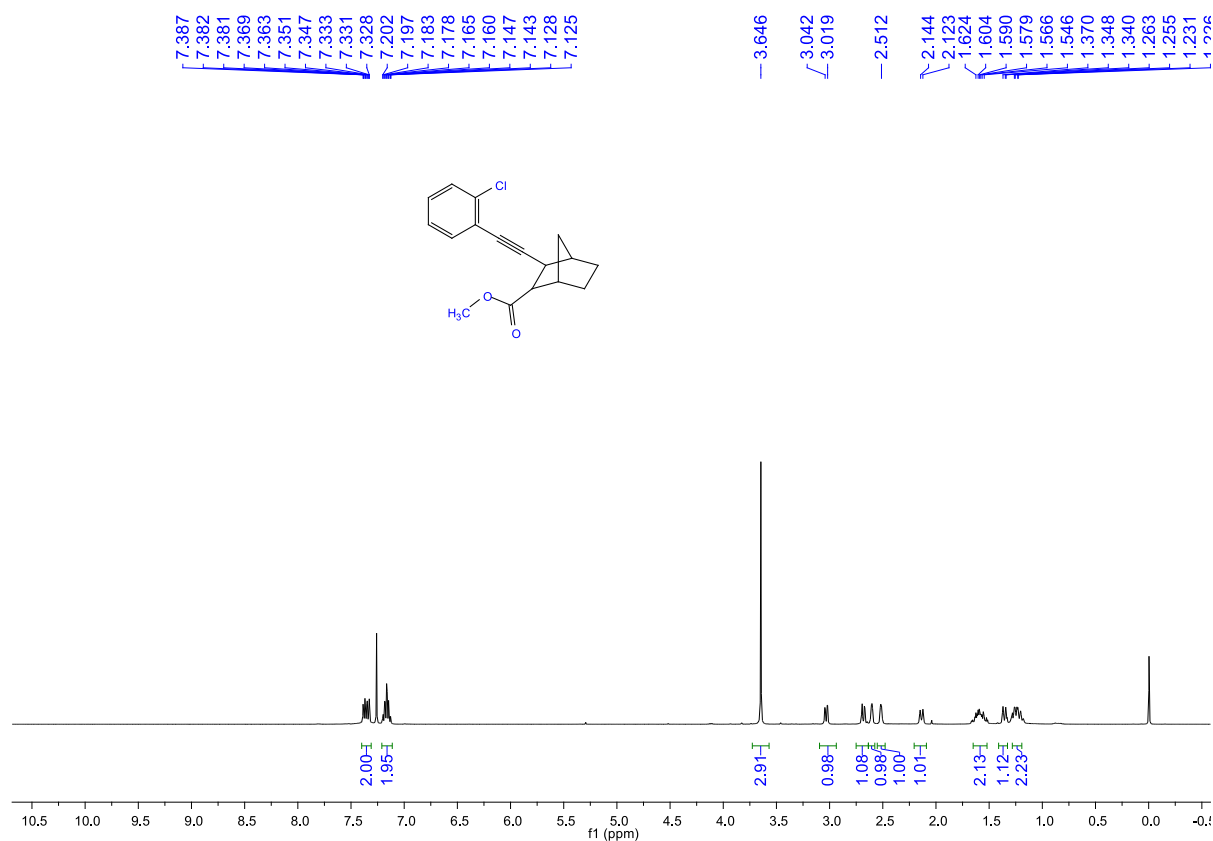

## <sup>13</sup>C NMR (125 MHz, CDCl<sub>3</sub>) spectrum of compound 4u

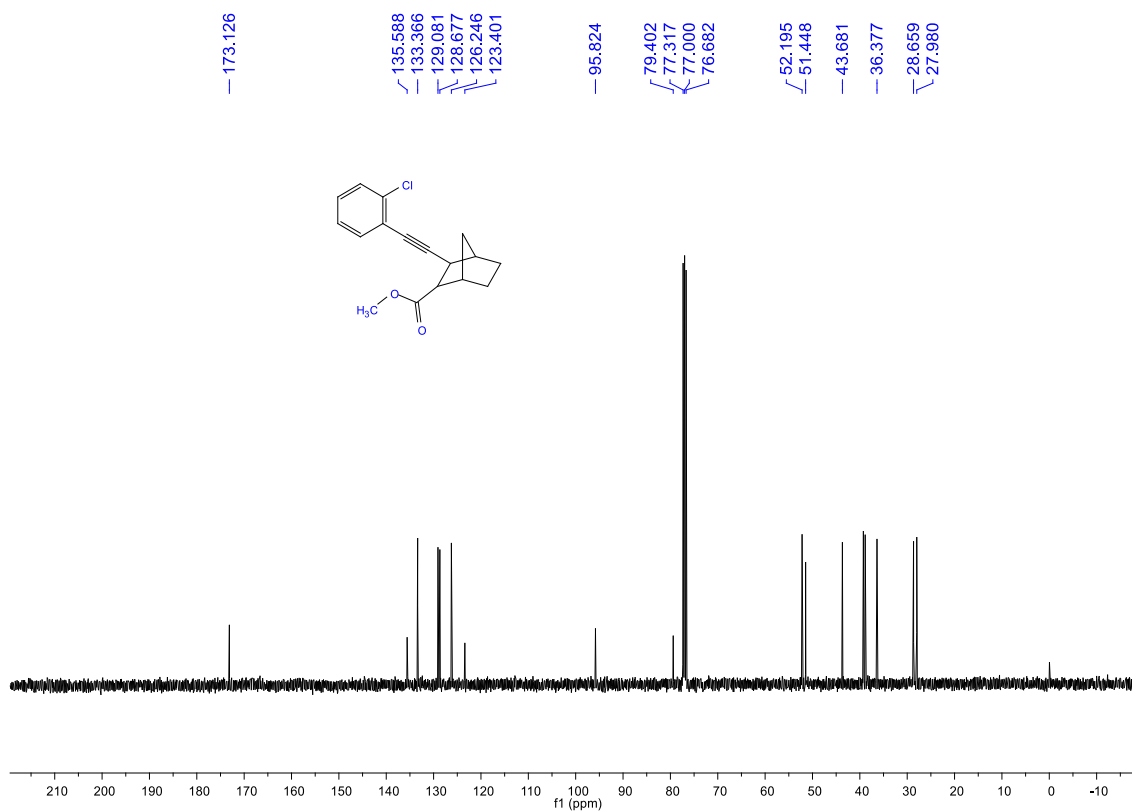

# SUPPORTING INFORMATION

## <sup>1</sup>H NMR (500 MHz, CDCl<sub>3</sub>) spectrum of compound 4v

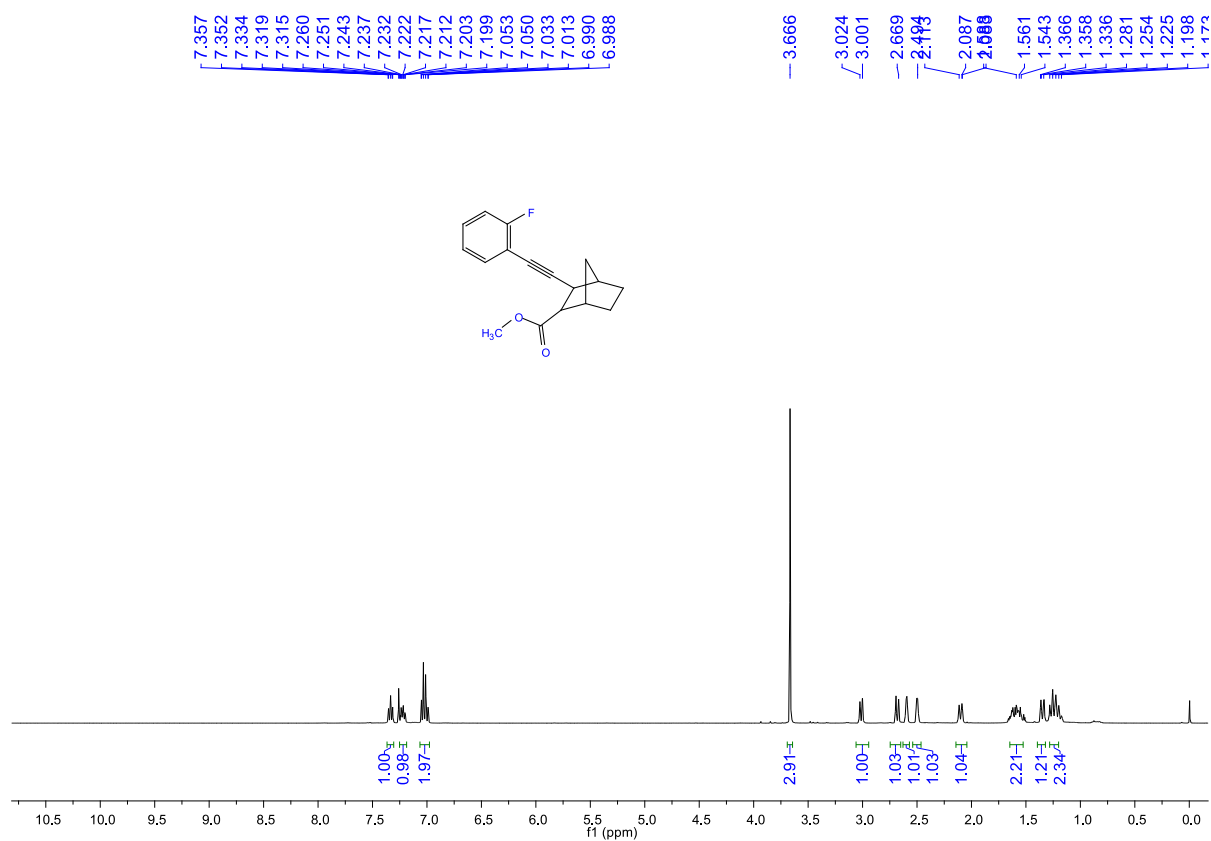

## <sup>13</sup>C NMR (125 MHz, CDCl<sub>3</sub>) spectrum of compound 4v

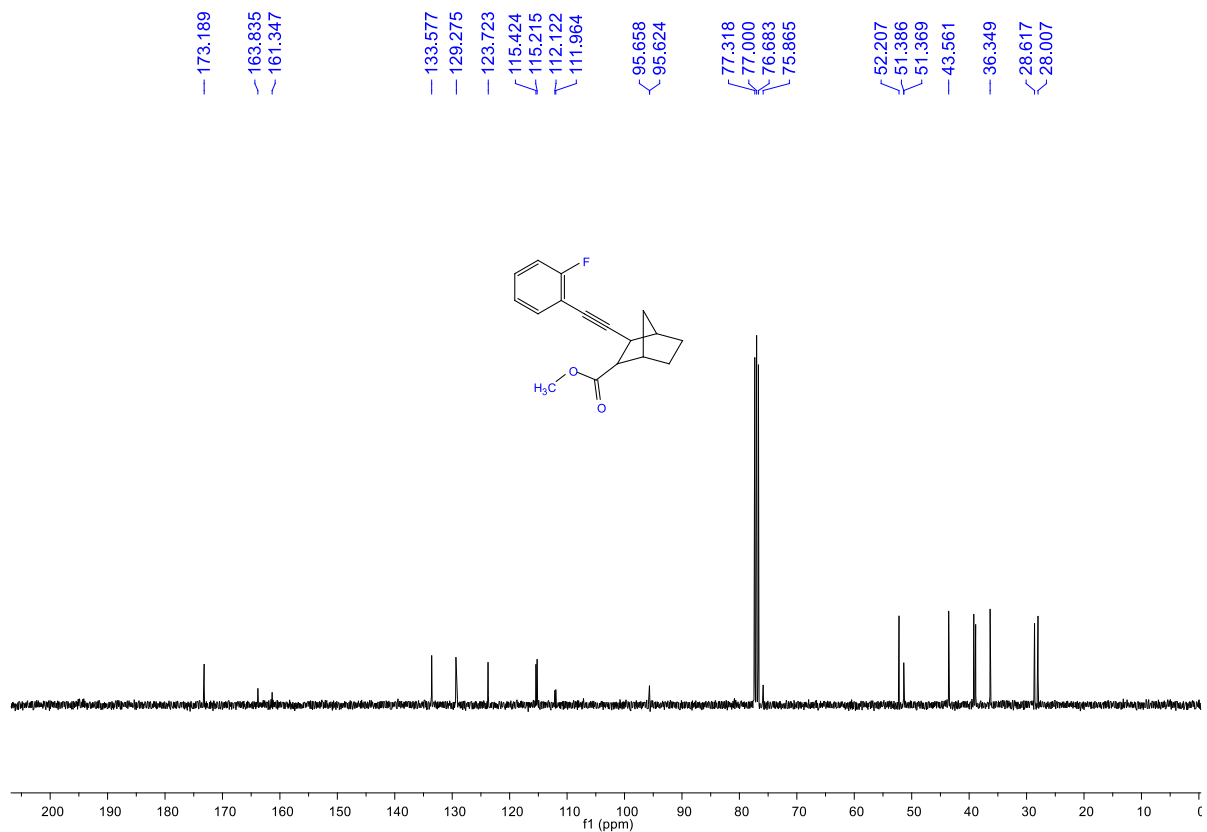

# SUPPORTING INFORMATION

## <sup>1</sup>H NMR (500 MHz, CDCl<sub>3</sub>) spectrum of compound 4w

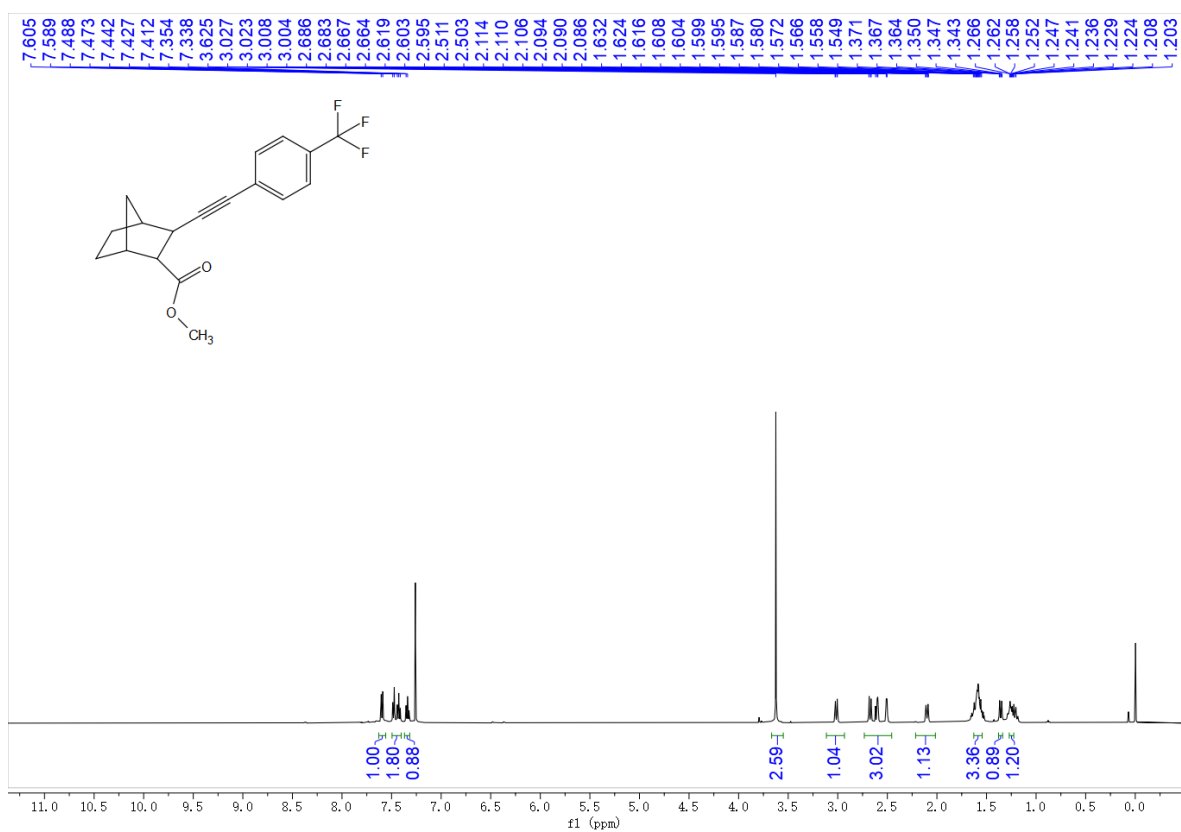

## <sup>13</sup>C NMR (125 MHz, CDCl<sub>3</sub>) spectrum of compound 4w

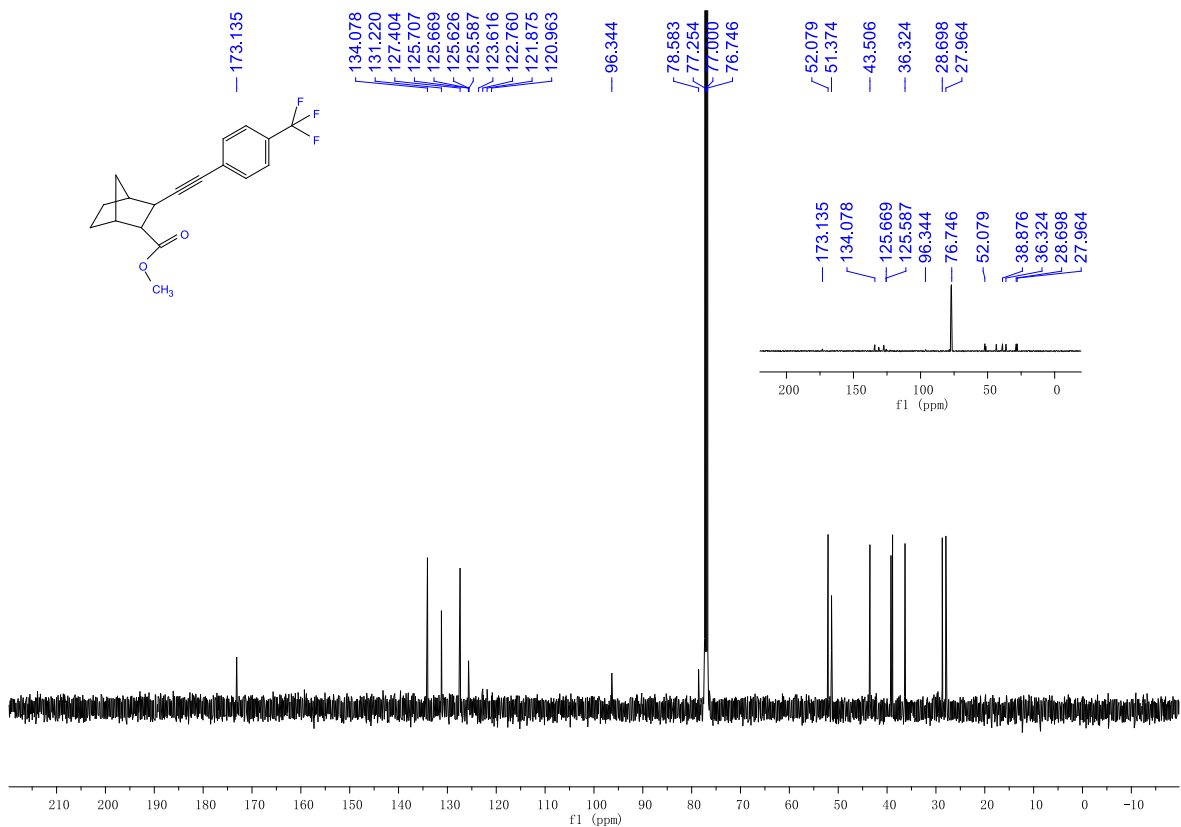

# SUPPORTING INFORMATION

## <sup>1</sup>H NMR (400 MHz, CDCl<sub>3</sub>) spectrum of compound 4x

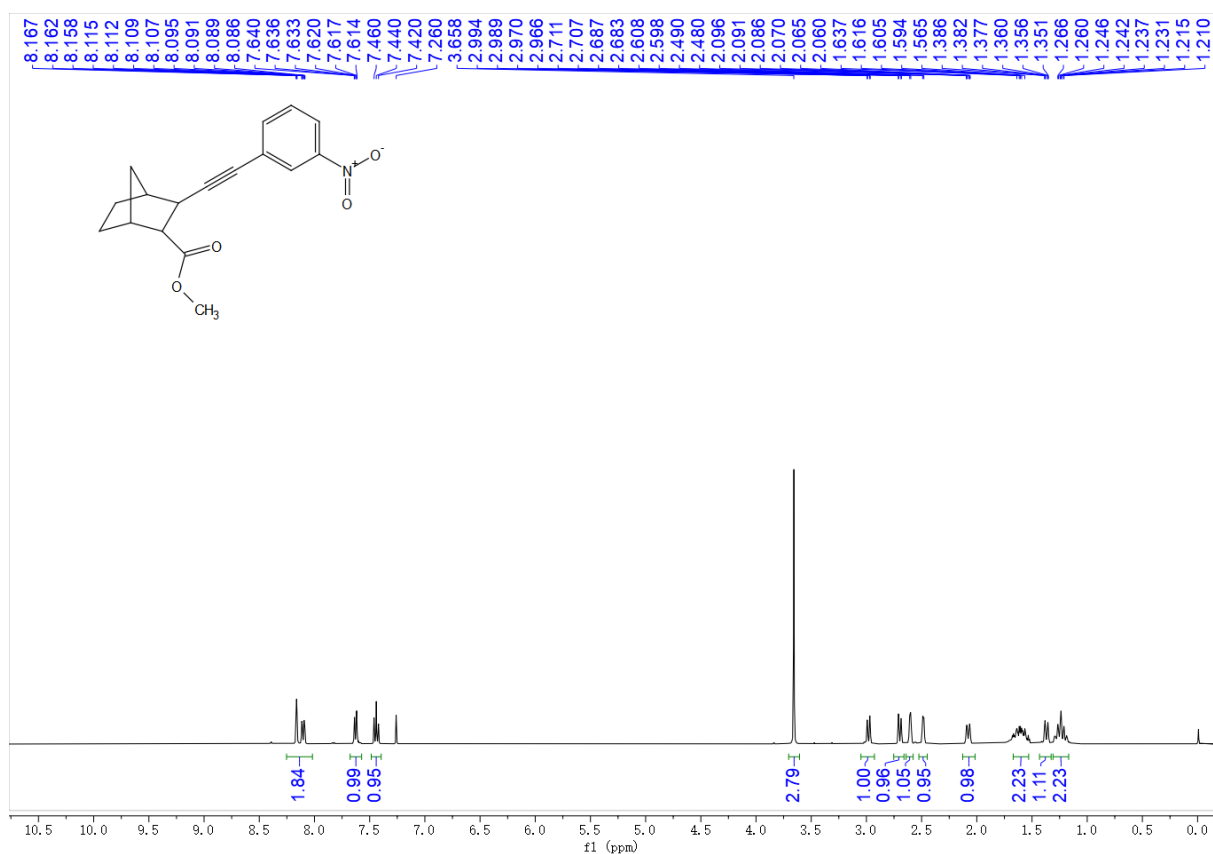

## <sup>13</sup>C NMR (100 MHz, CDCl<sub>3</sub>) spectrum of compound 4x

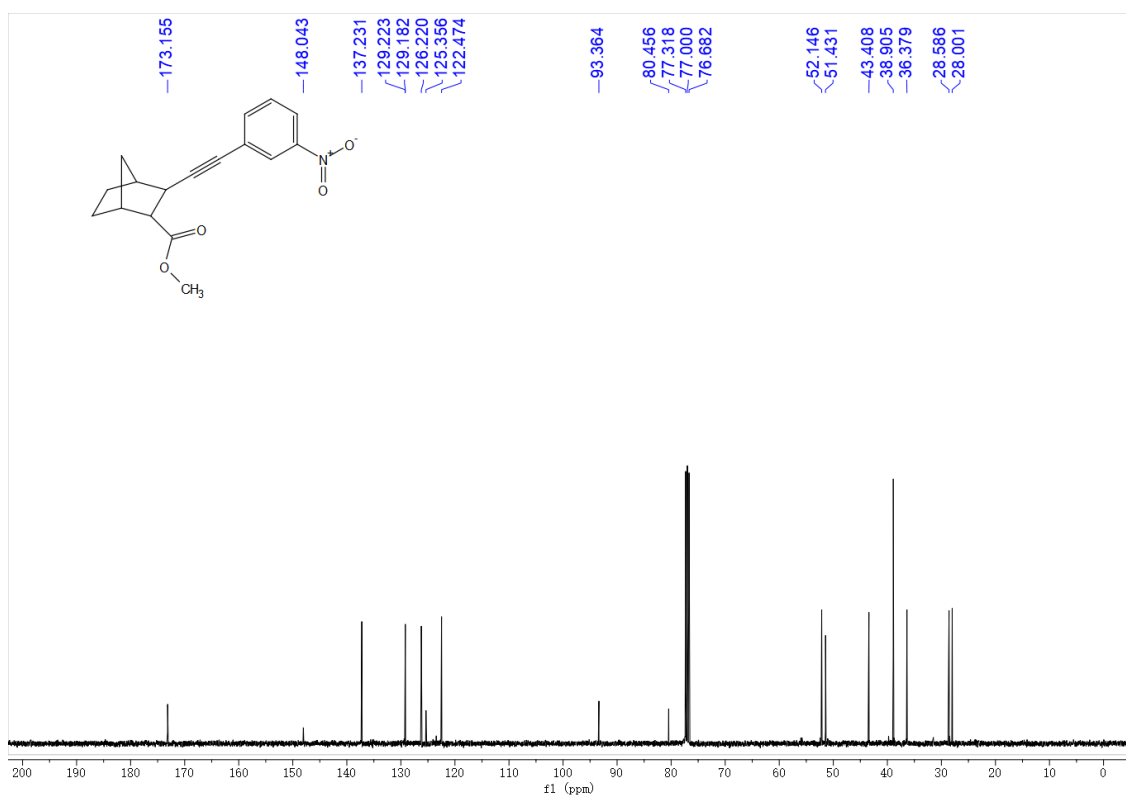



# SUPPORTING INFORMATION

## <sup>1</sup>H NMR (400 MHz, CDCl<sub>3</sub>) spectrum of compound 4y

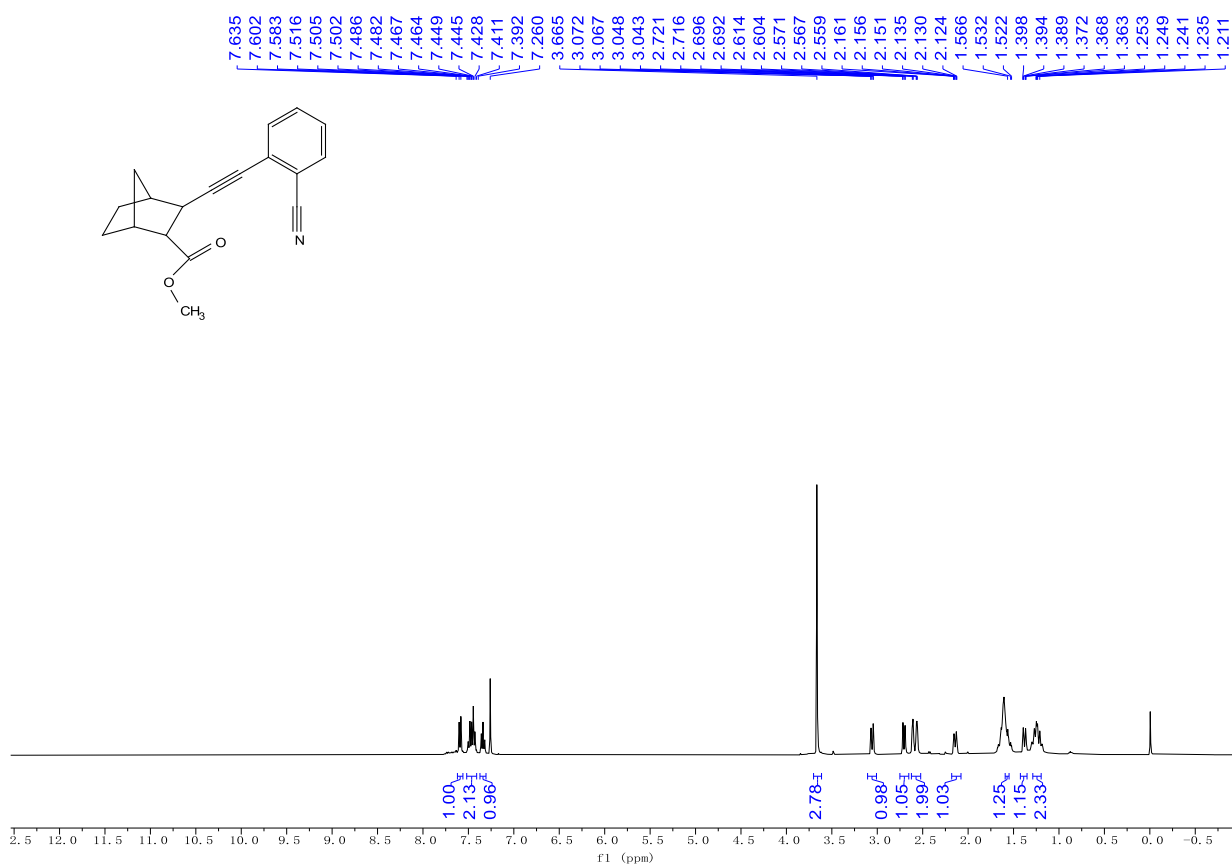

## <sup>13</sup>C NMR (100 MHz, CDCl<sub>3</sub>) spectrum of compound 4y

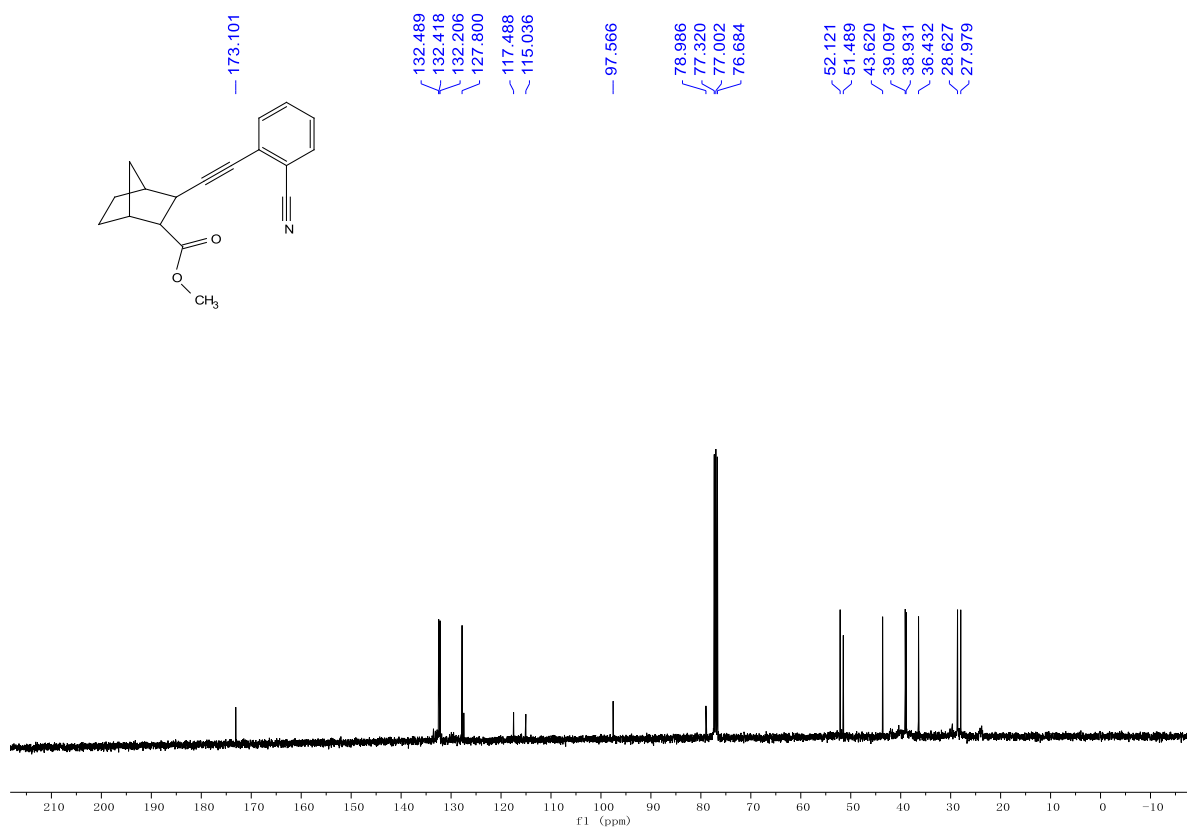

# SUPPORTING INFORMATION

## <sup>1</sup>H NMR (500 MHz, CDCl<sub>3</sub>) spectrum of compound 4z

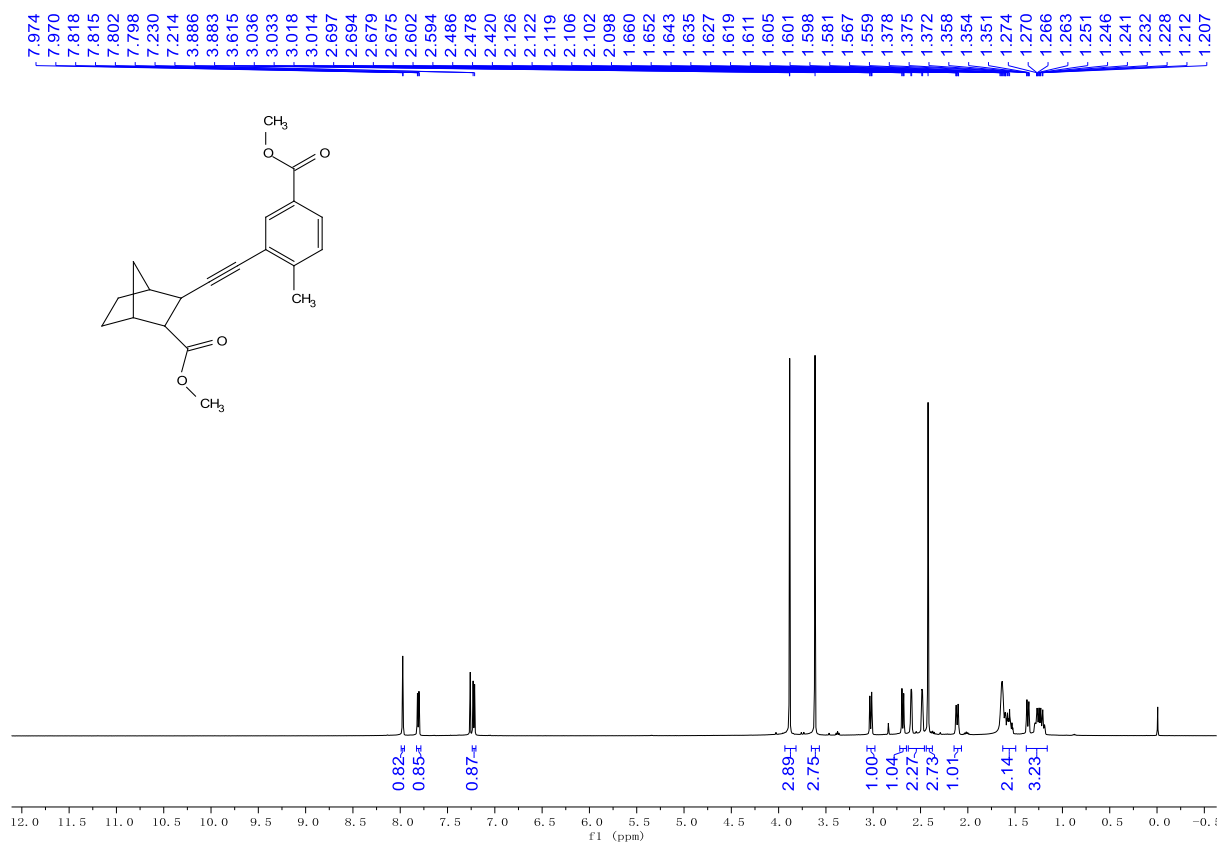

## <sup>13</sup>C NMR (125 MHz, CDCl<sub>3</sub>) spectrum of compound 4z

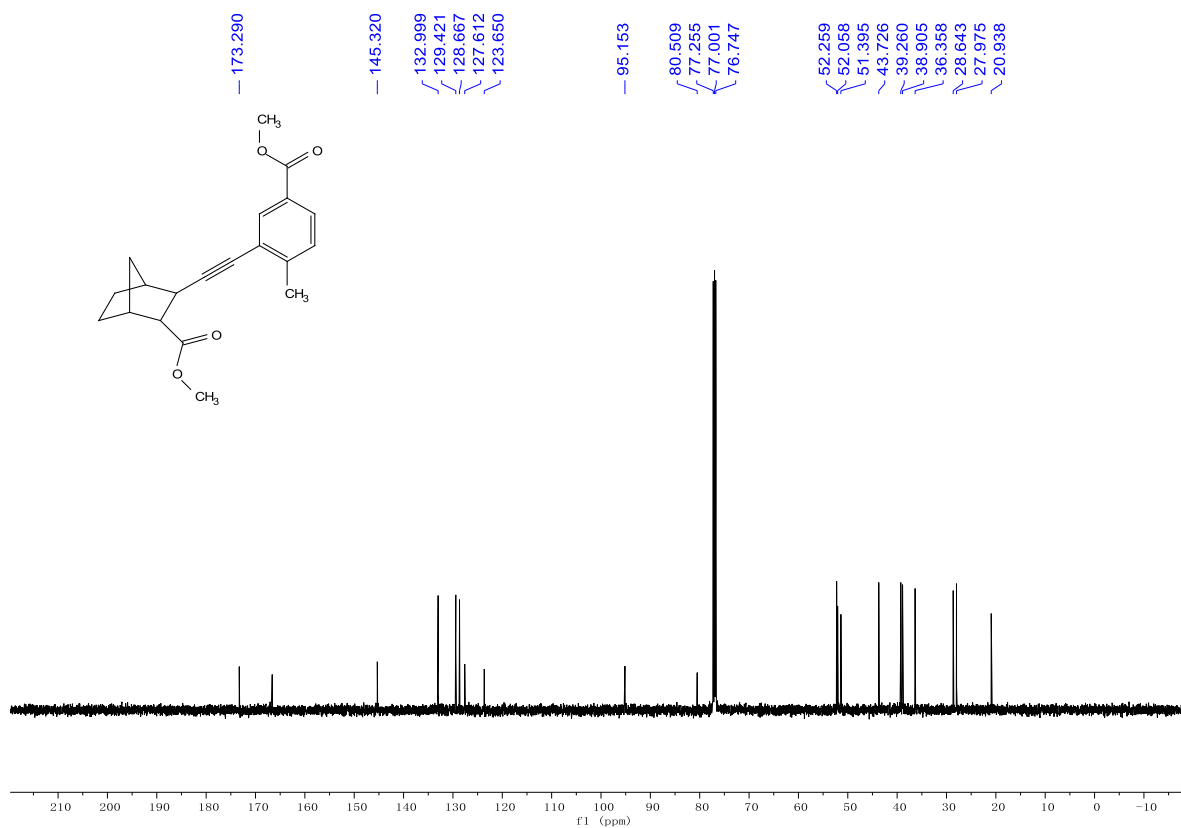

# SUPPORTING INFORMATION

## <sup>1</sup>H NMR (500 MHz, CDCl<sub>3</sub>) spectrum of compound 4aa

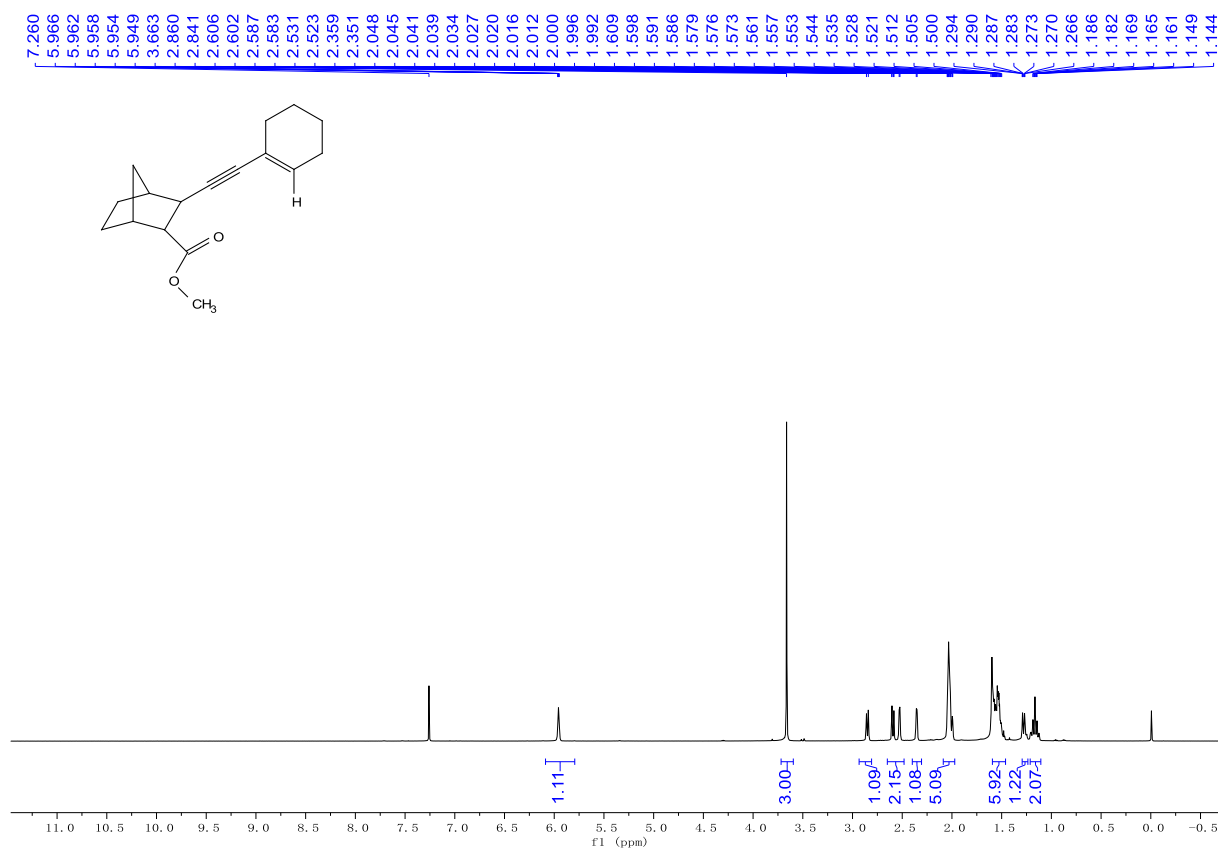

## <sup>13</sup>C NMR (125 MHz, CDCl<sub>3</sub>) spectrum of compound 4aa

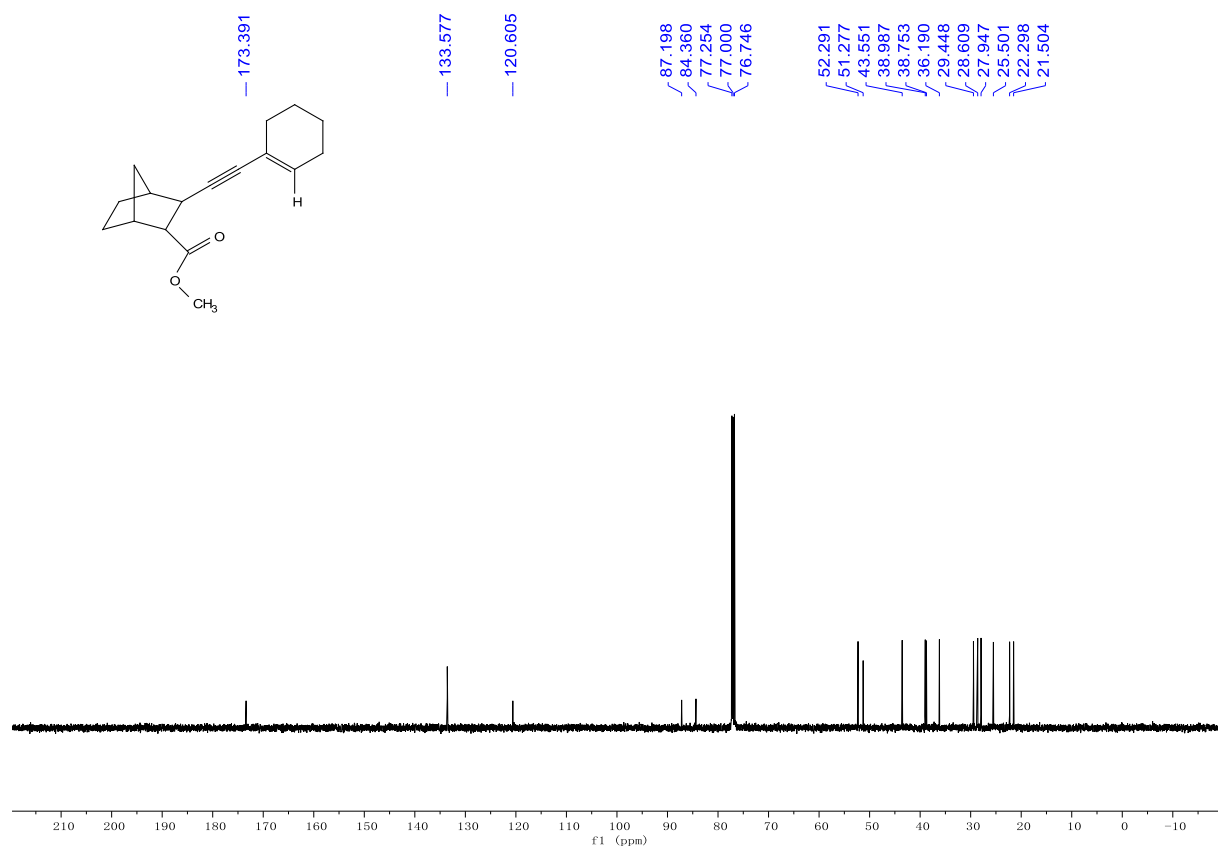

SUPPORTING INFORMATION

<sup>1</sup>H NMR (500 MHz, CDCl<sub>3</sub>) spectrum of compound 4ab

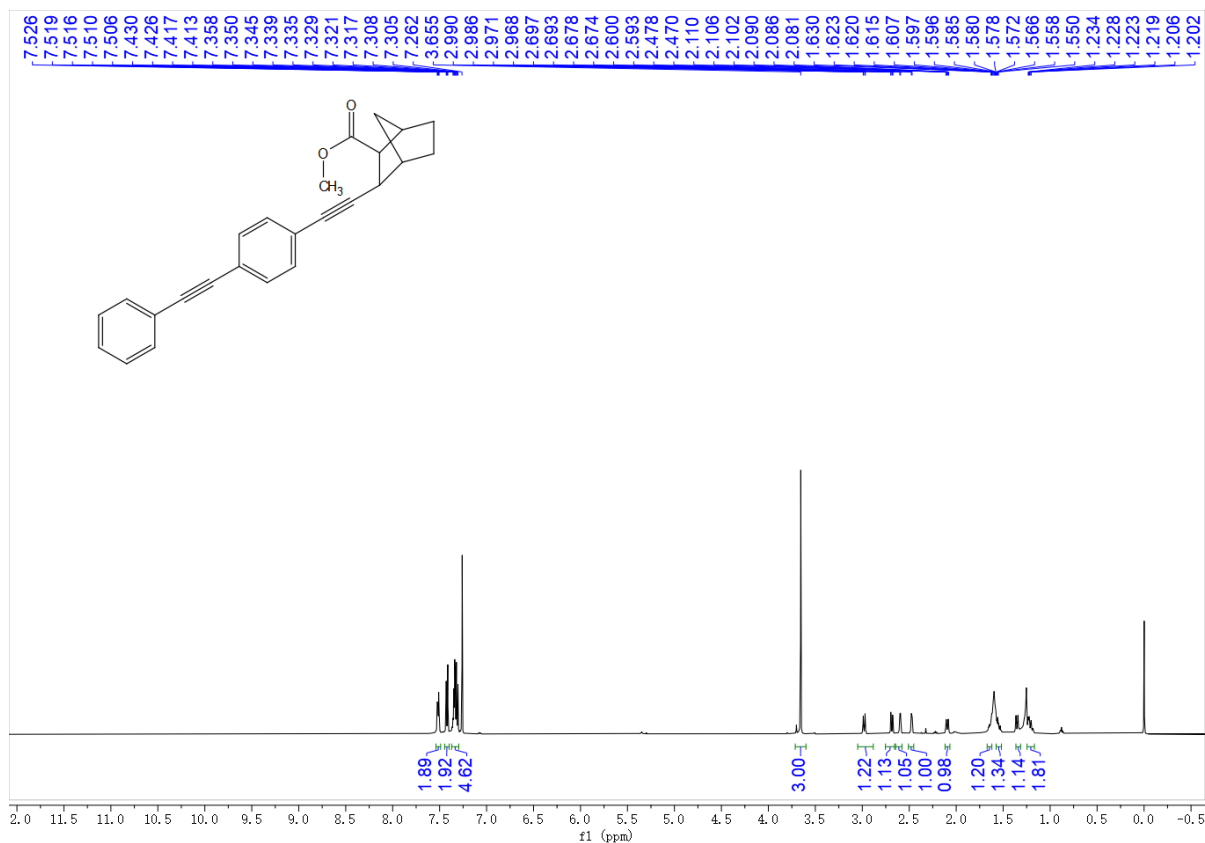

<sup>13</sup>C NMR (125 MHz, CDCl<sub>3</sub>) spectrum of compound 4ab

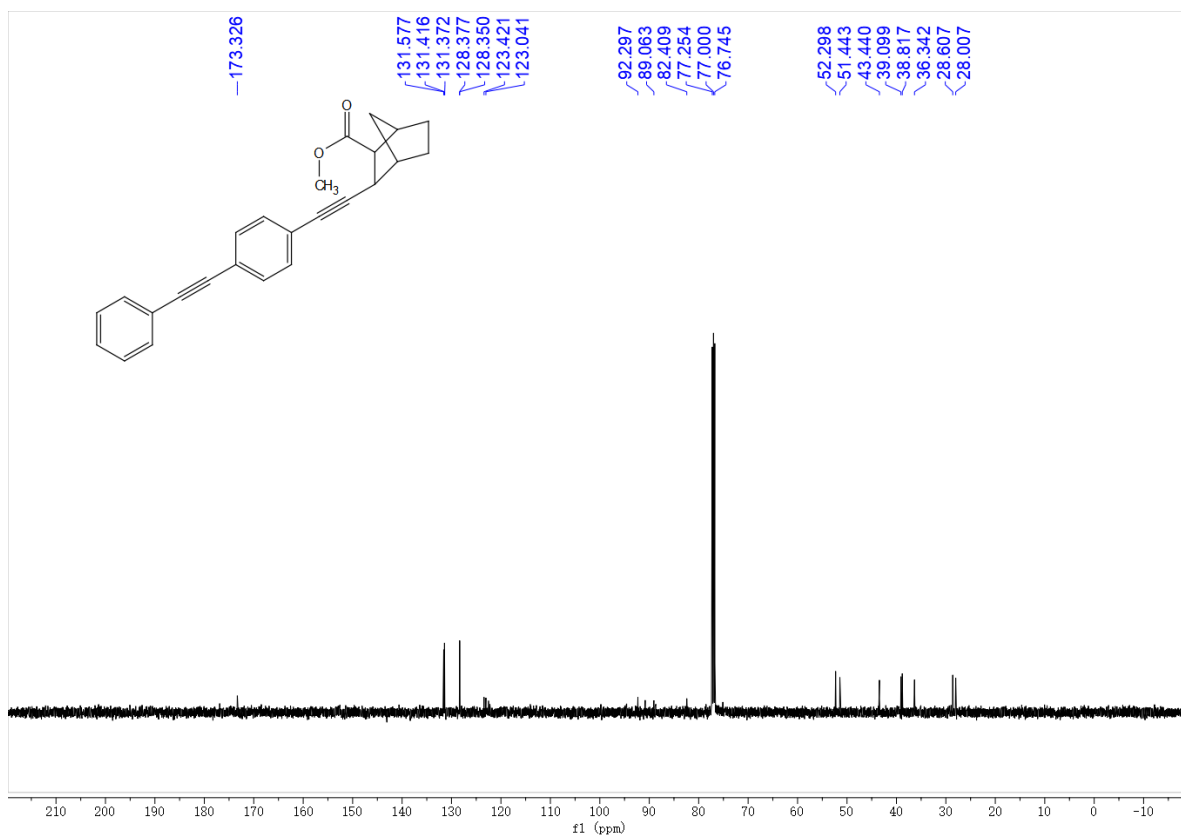

# SUPPORTING INFORMATION

## <sup>1</sup>H NMR (500 MHz, CDCl<sub>3</sub>) spectrum of compound 4ac

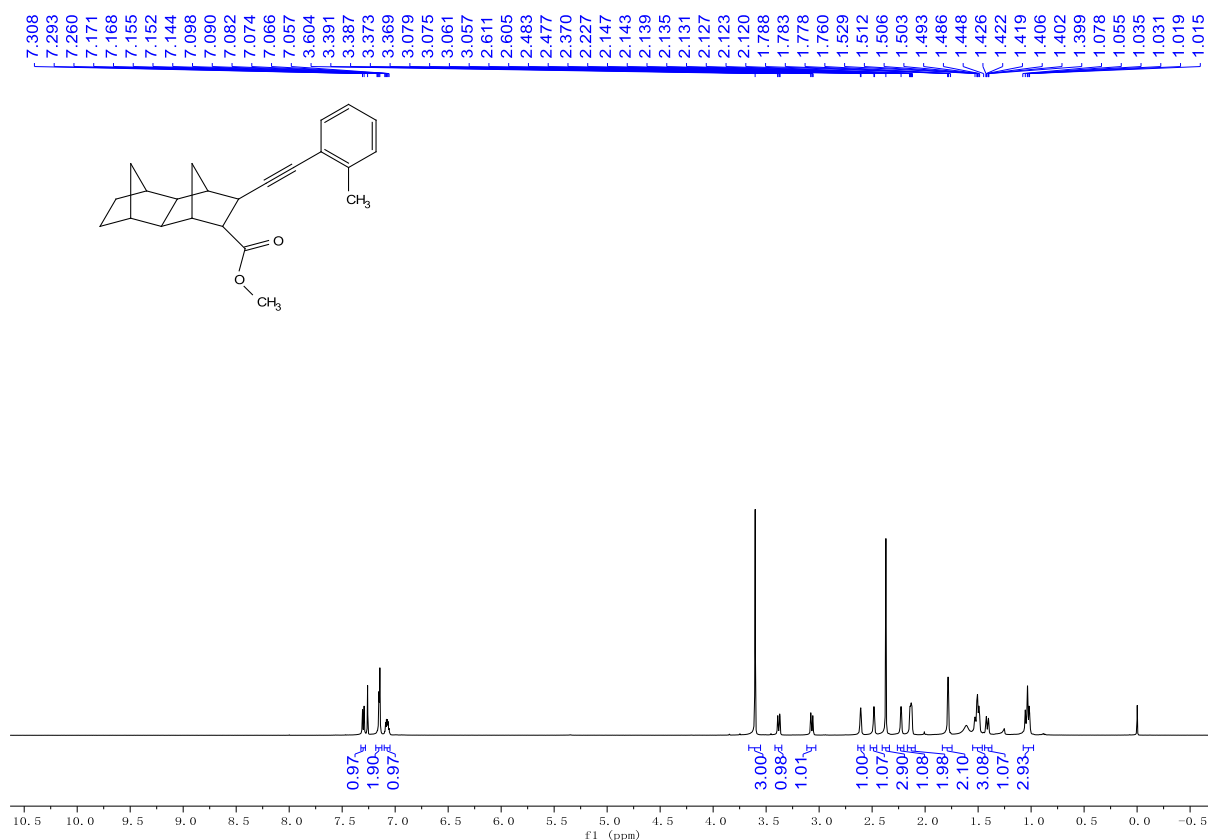

## <sup>13</sup>C NMR (125 MHz, CDCl<sub>3</sub>) spectrum of compound 4ac

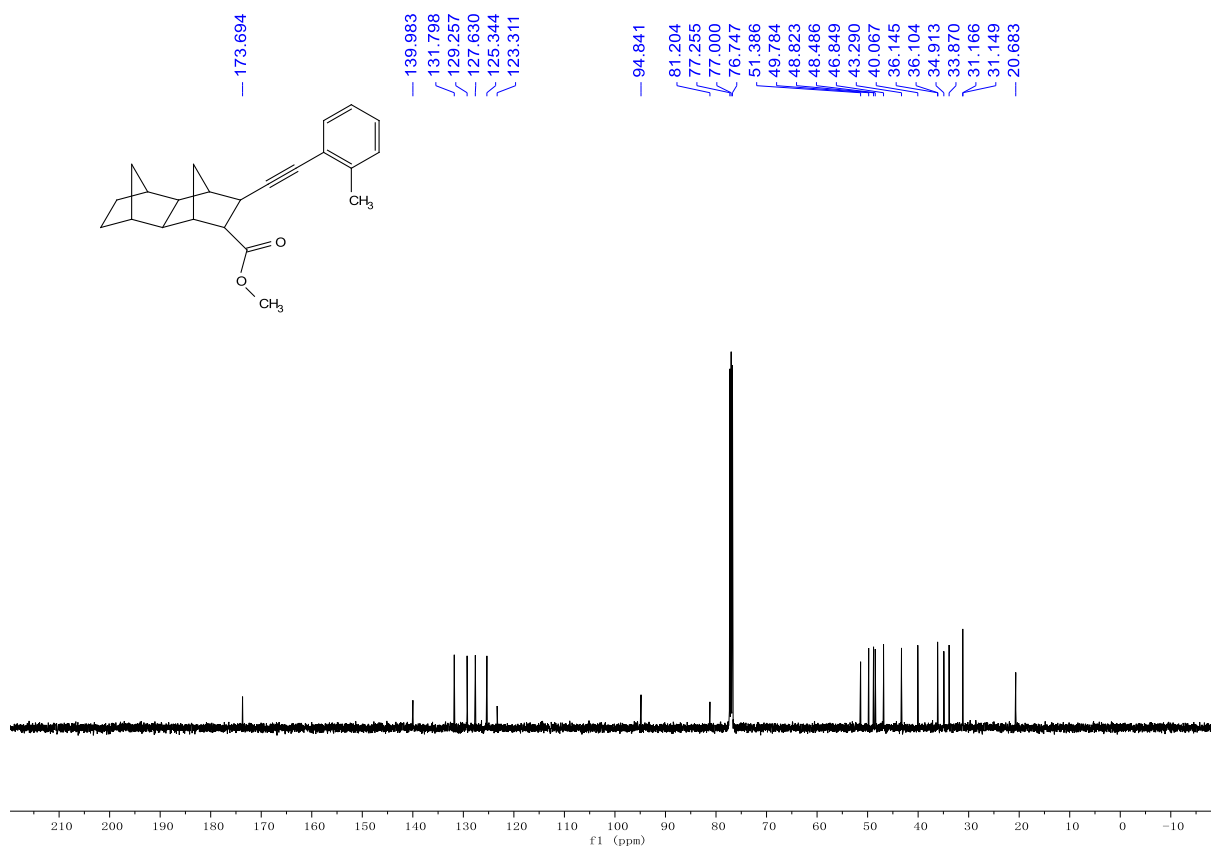

# SUPPORTING INFORMATION

## $^1\text{H}$ NMR (400 MHz, $\text{CDCl}_3$ ) spectrum of compound 4ad-1+4ad-2

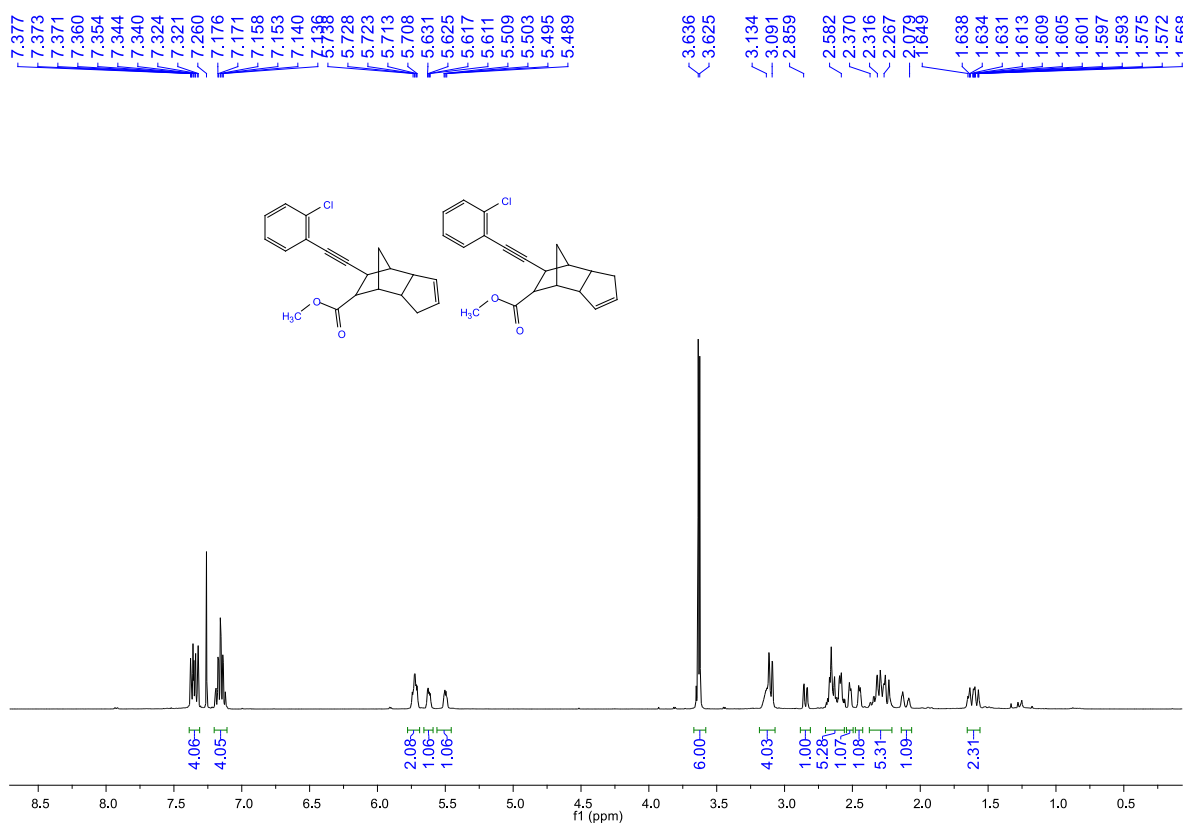

## $^{13}\text{C}$ NMR (100 MHz, $\text{CDCl}_3$ ) spectrum of compound 4ad-1+4ad-2

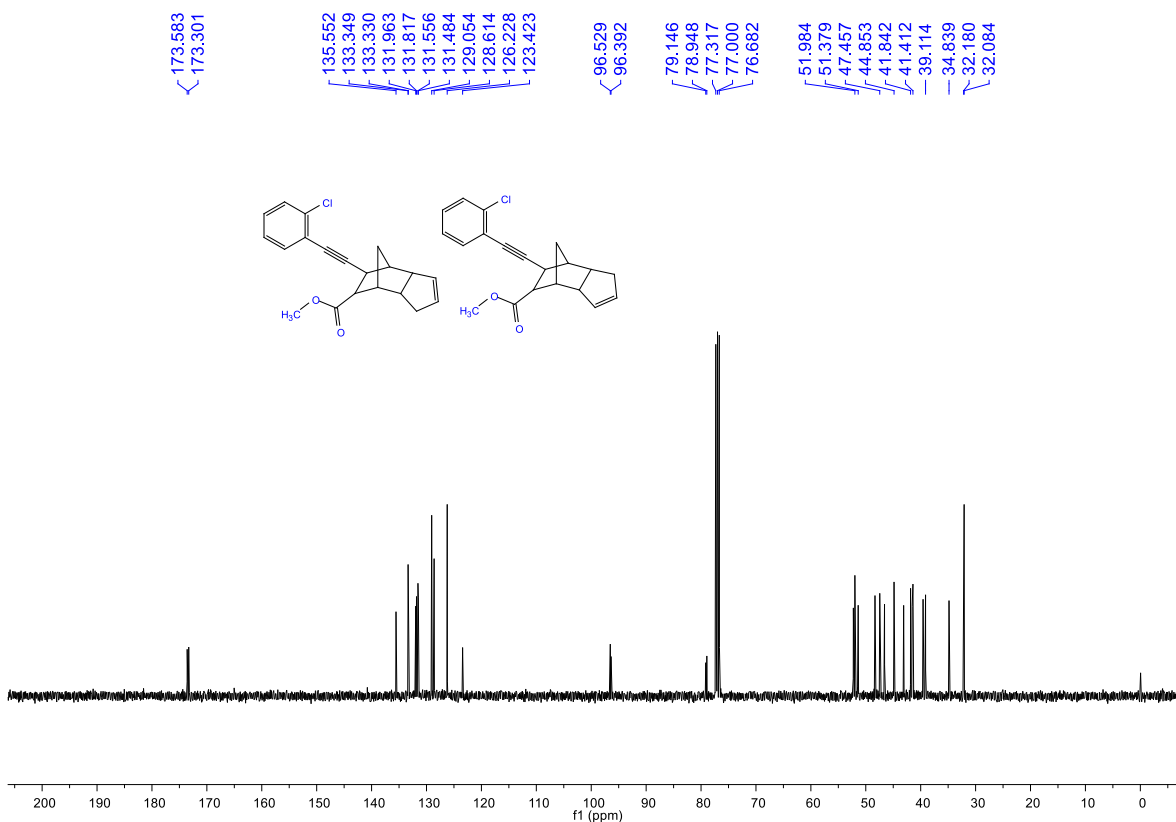

# SUPPORTING INFORMATION

## <sup>1</sup>H NMR (500 MHz, CDCl<sub>3</sub>) spectrum of compound 4ae

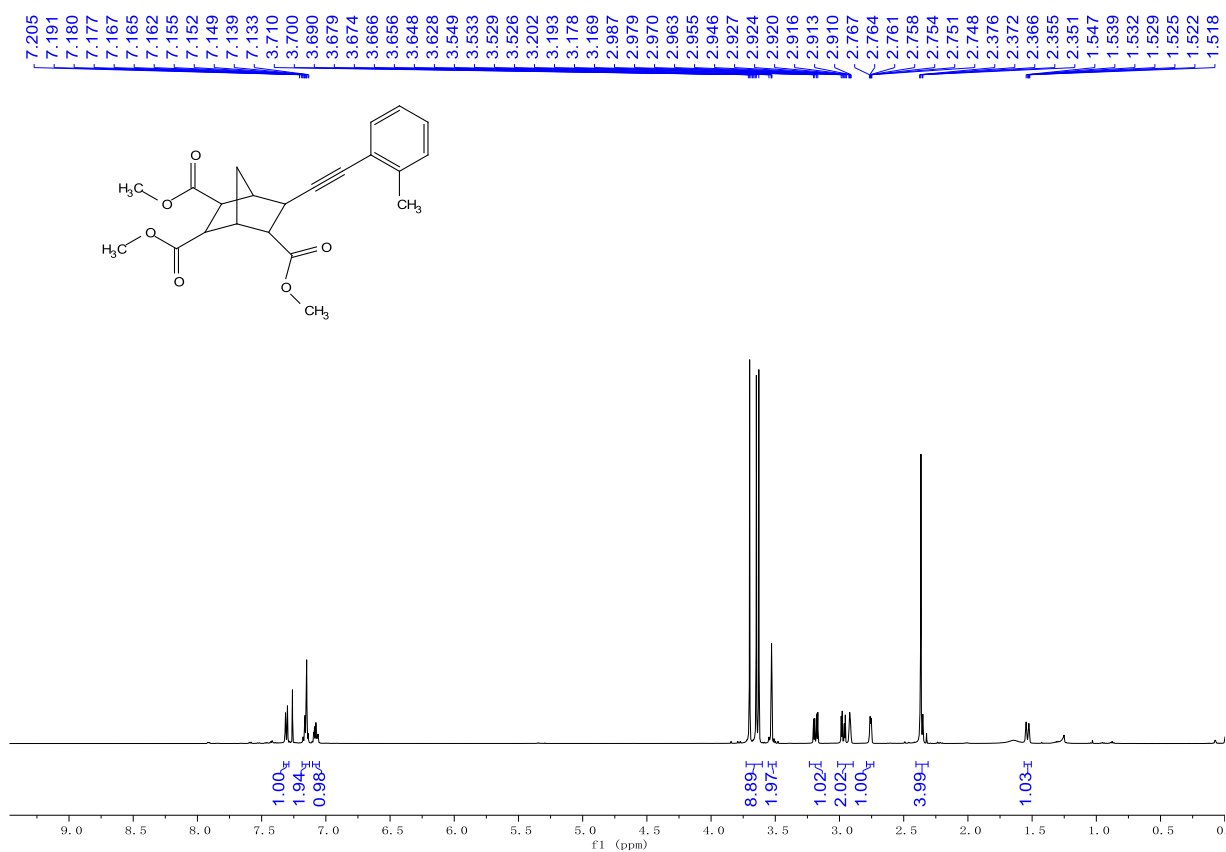

## <sup>13</sup>C NMR (125 MHz, CDCl<sub>3</sub>) spectrum of compound 4ae

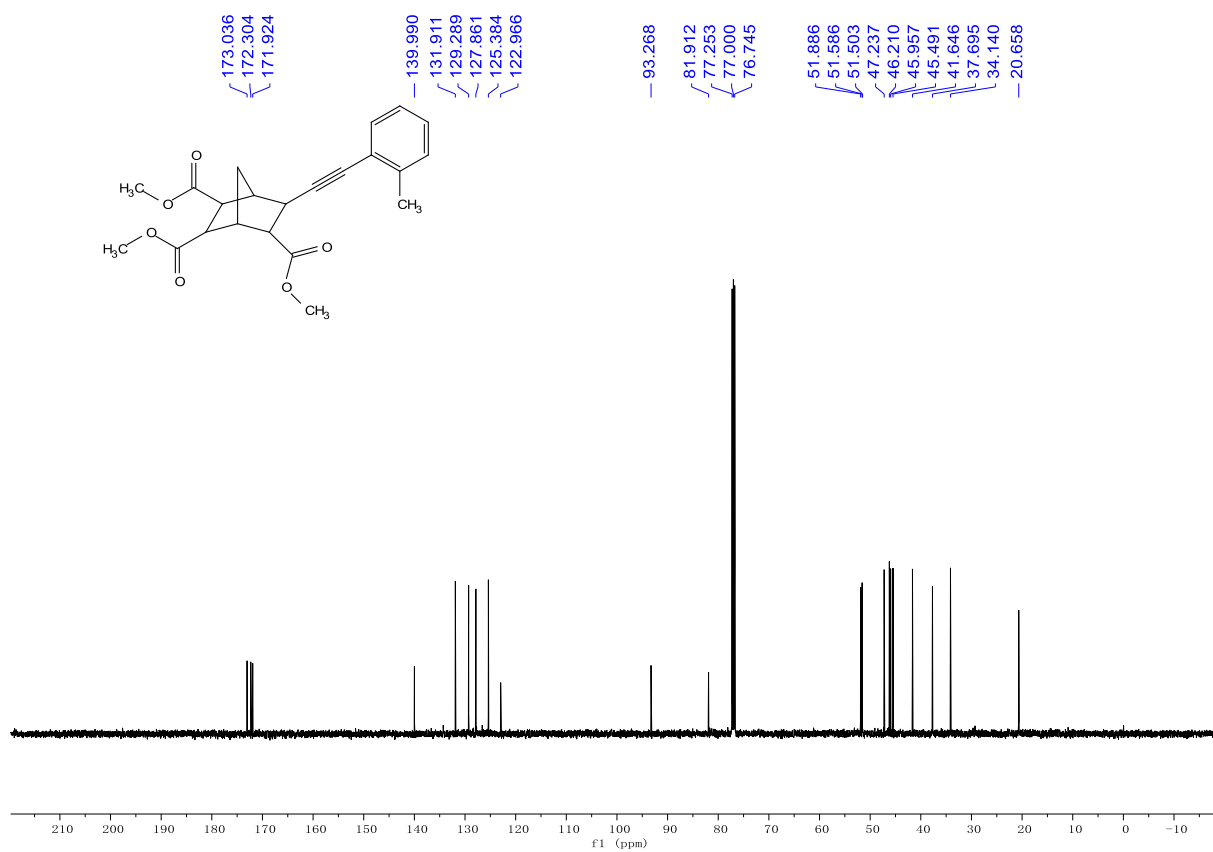

# SUPPORTING INFORMATION

## <sup>1</sup>H NMR (500 MHz, CDCl<sub>3</sub>) spectrum of compound 4af

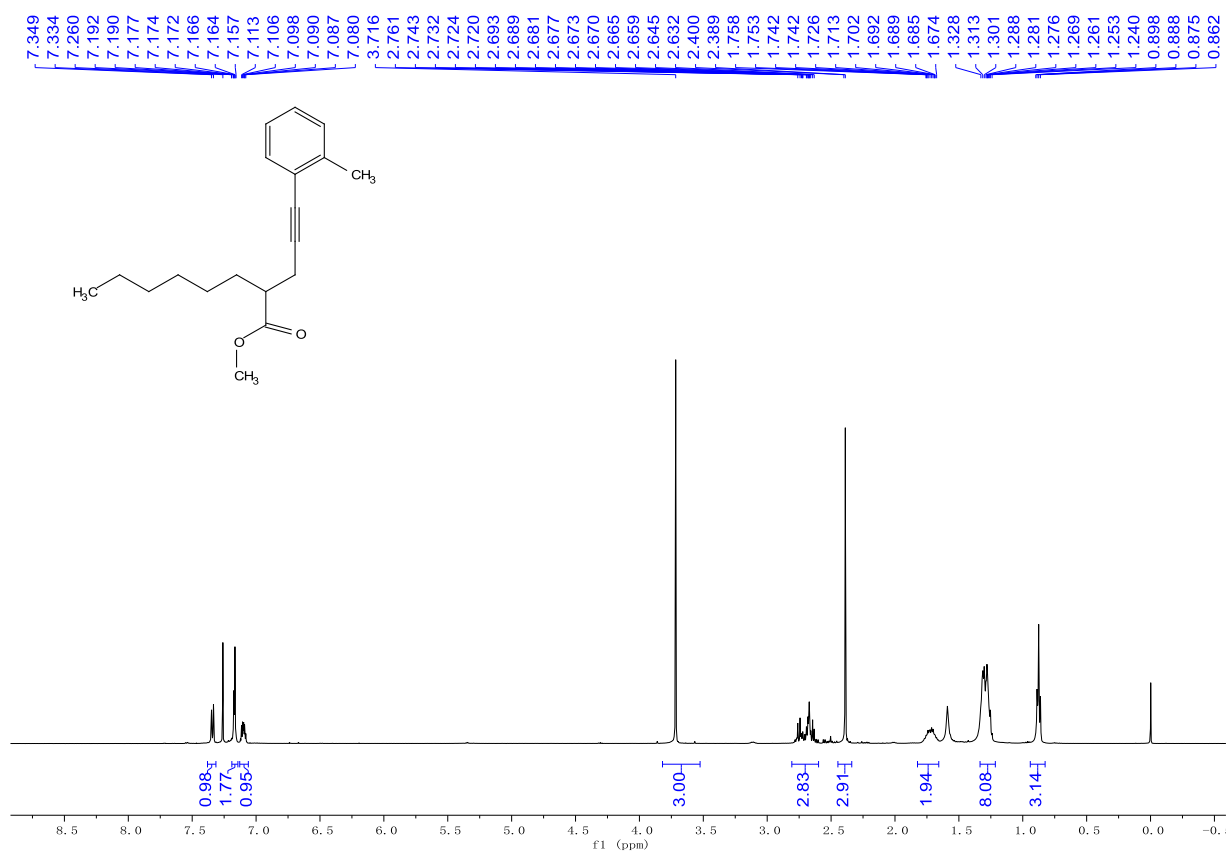

## <sup>13</sup>C NMR (125 MHz, CDCl<sub>3</sub>) spectrum of compound 4af

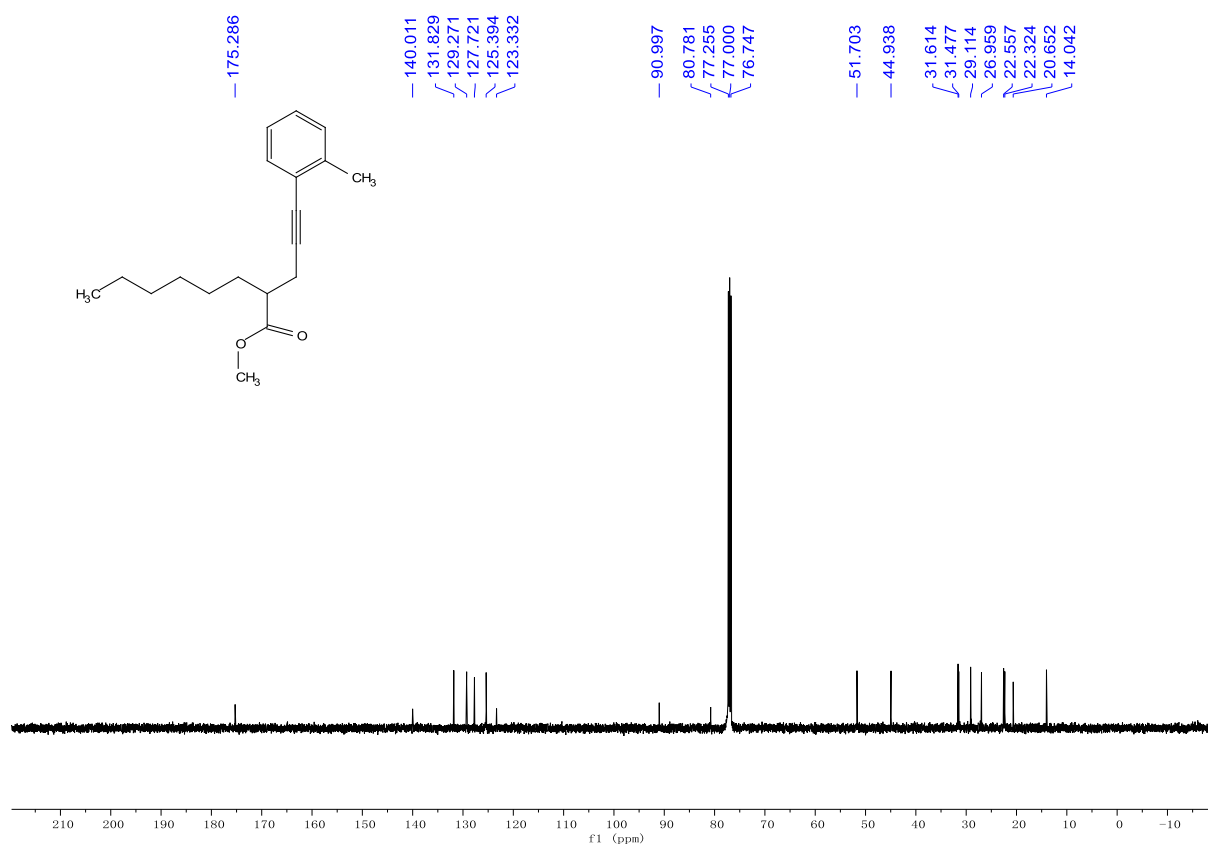



# SUPPORTING INFORMATION

## <sup>1</sup>H NMR (500 MHz, CDCl<sub>3</sub>) spectrum of compound 4ag

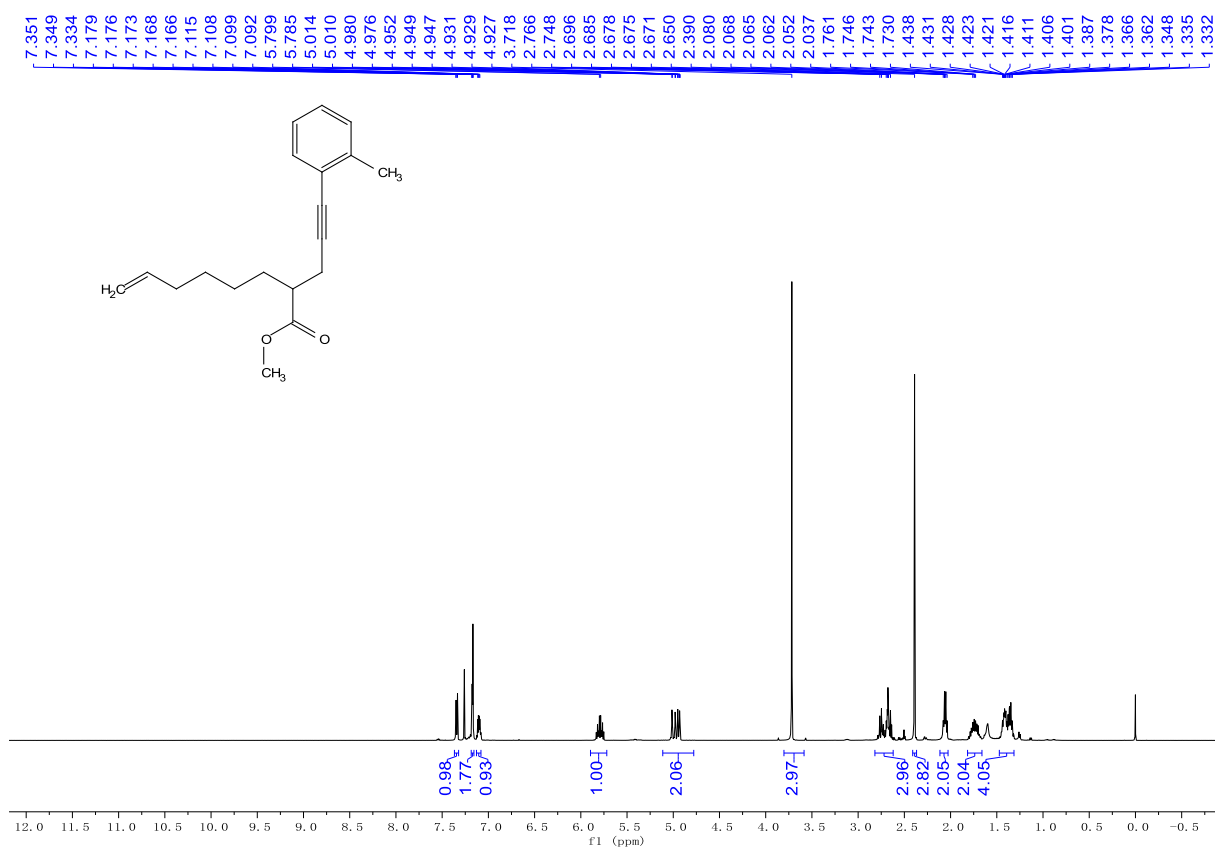

## <sup>13</sup>C NMR (125 MHz, CDCl<sub>3</sub>) spectrum of compound 4ag

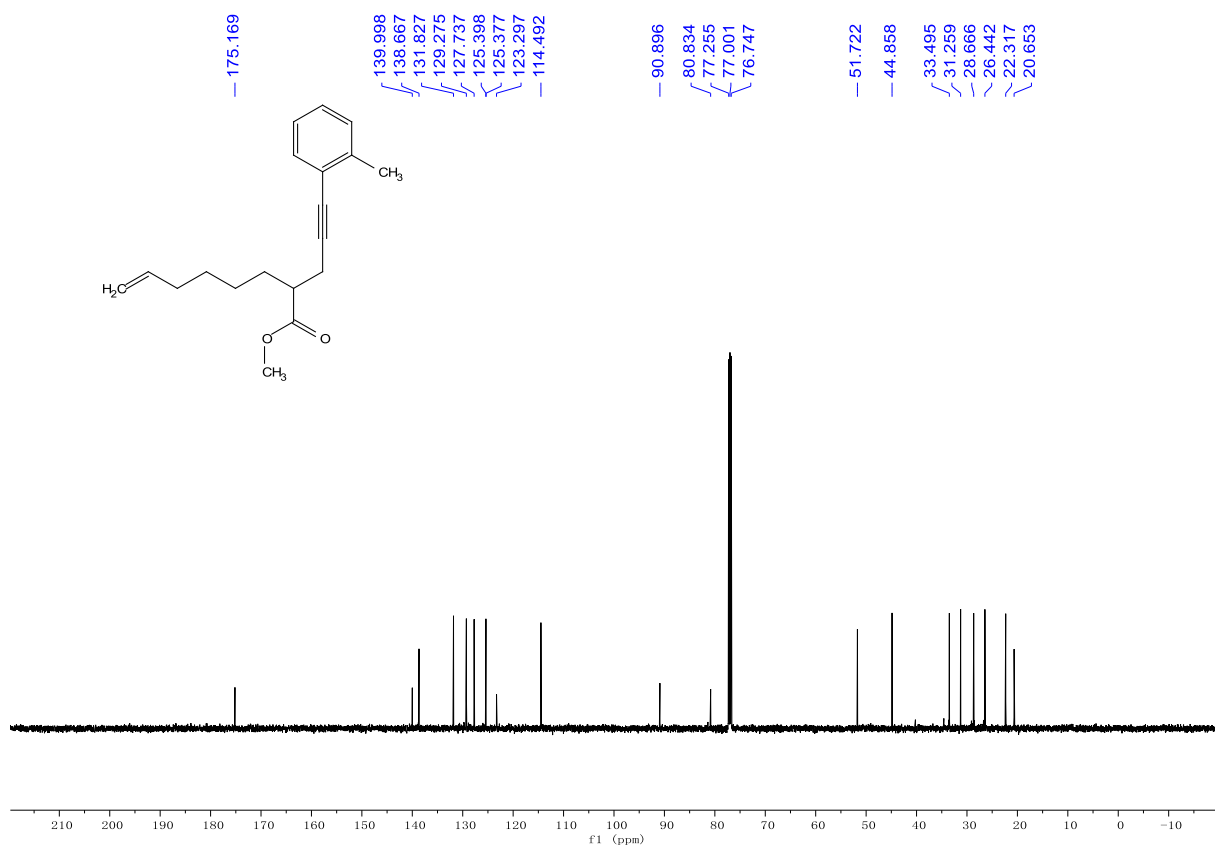

# SUPPORTING INFORMATION

## <sup>1</sup>H NMR (500 MHz, CDCl<sub>3</sub>) spectrum of compound 4ah

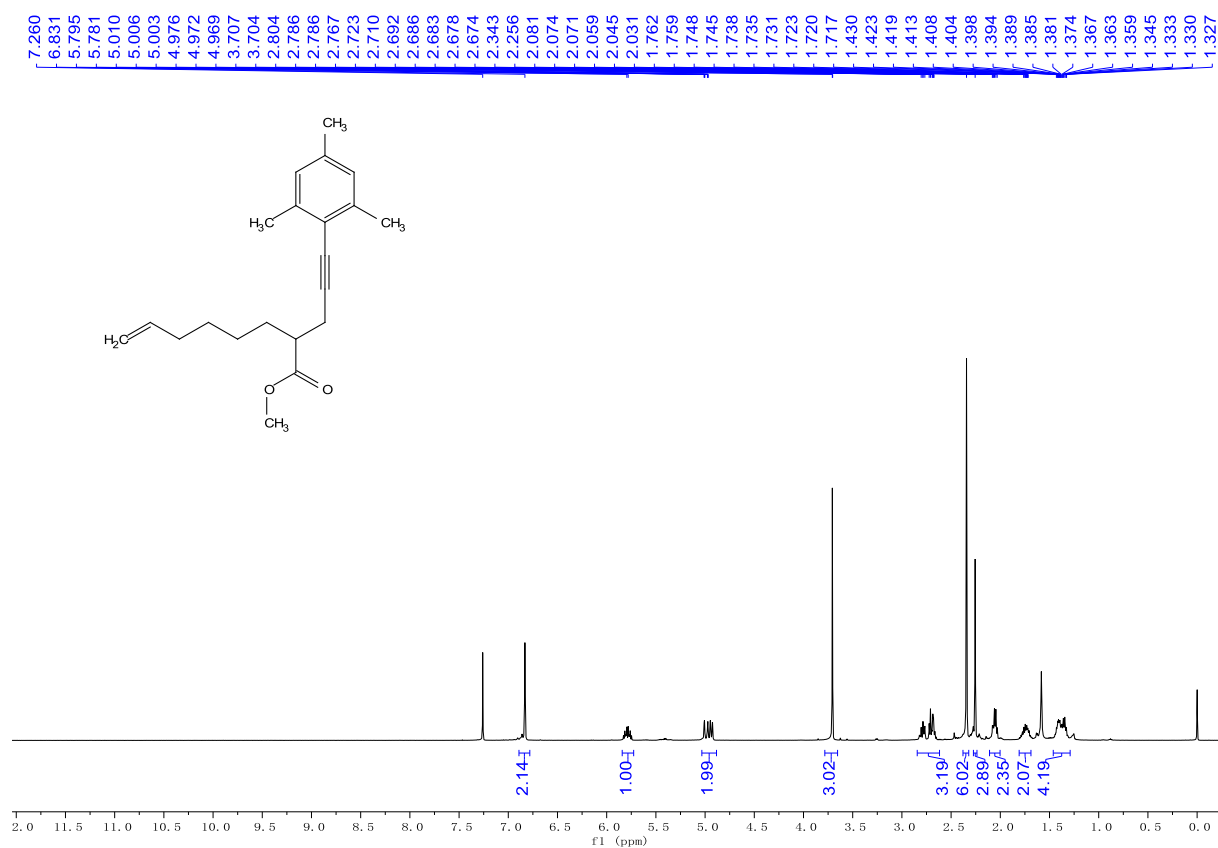

## <sup>13</sup>C NMR (125 MHz, CDCl<sub>3</sub>) spectrum of compound 4ah

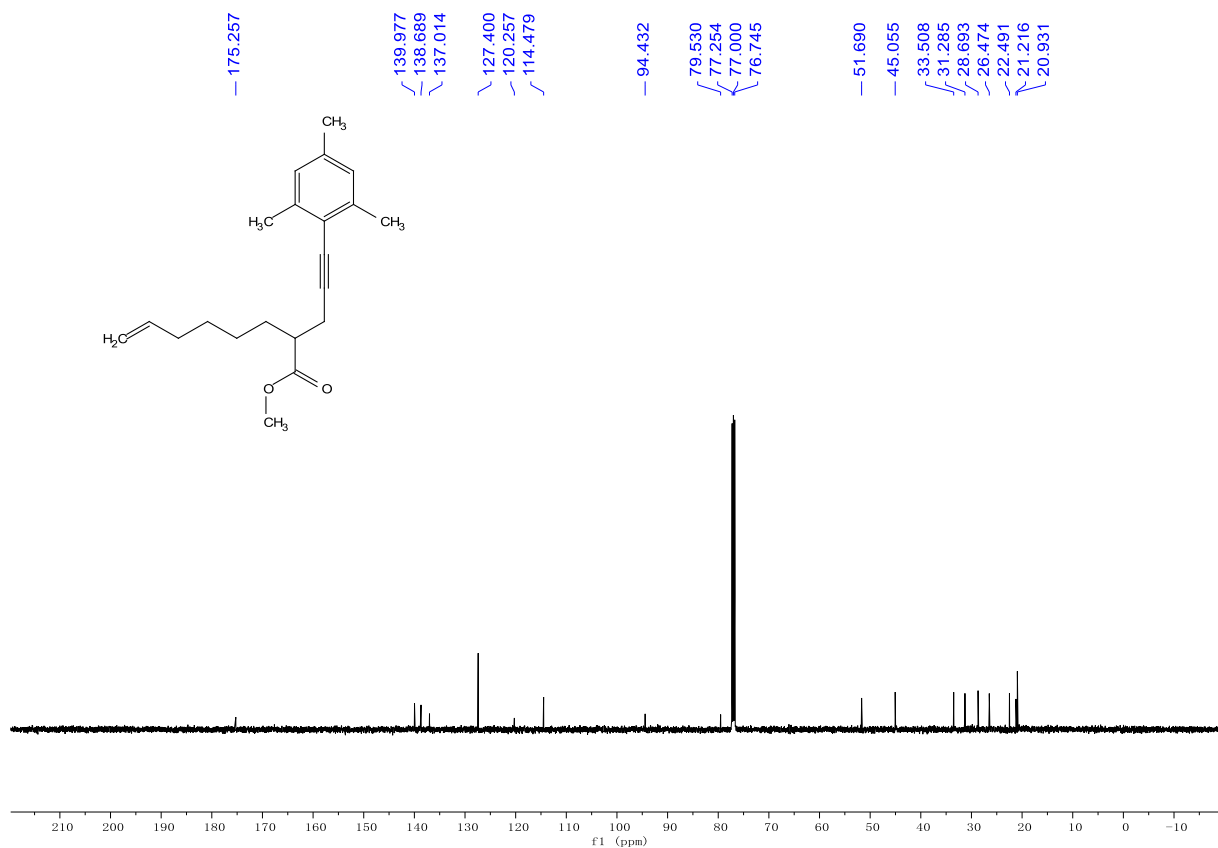

# SUPPORTING INFORMATION

## <sup>1</sup>H NMR (500 MHz, CDCl<sub>3</sub>) spectrum of compound 4ai

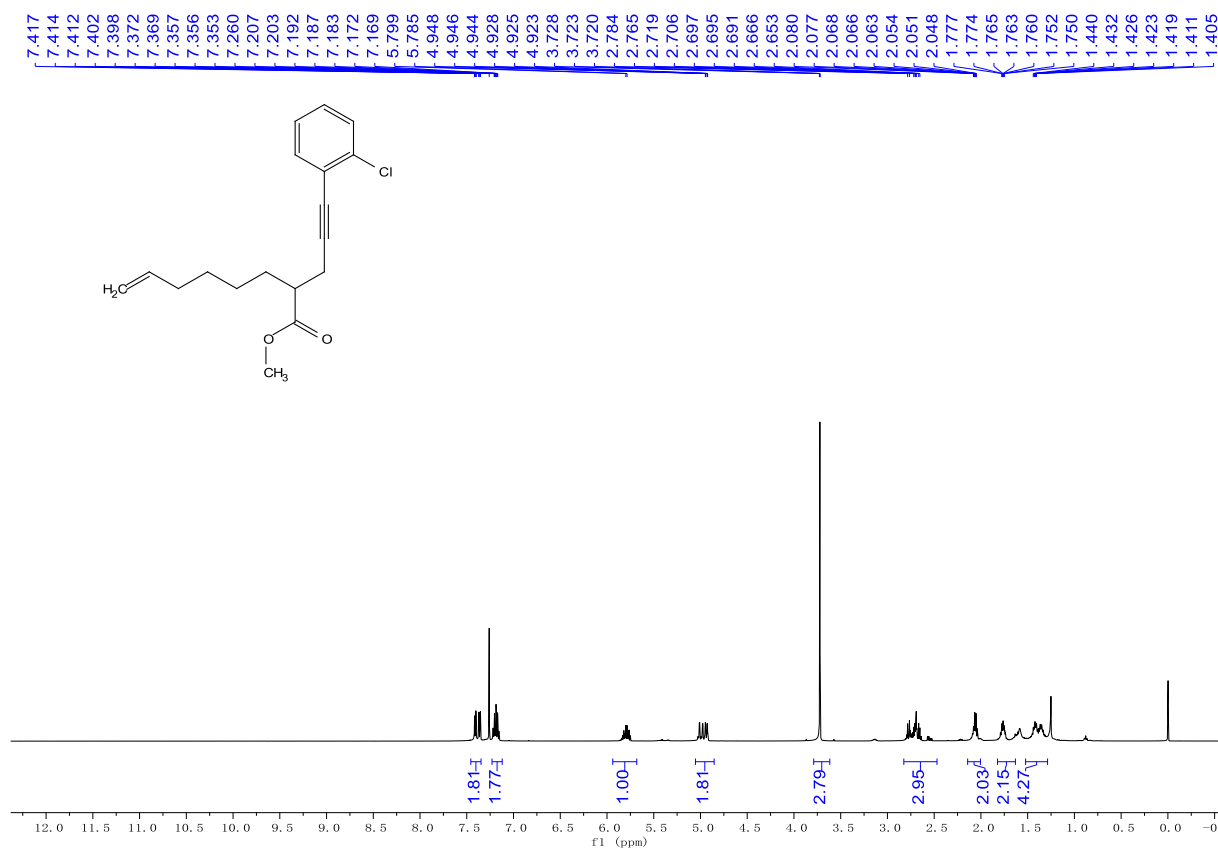

## <sup>13</sup>C NMR (125 MHz, CDCl<sub>3</sub>) spectrum of compound 4ai

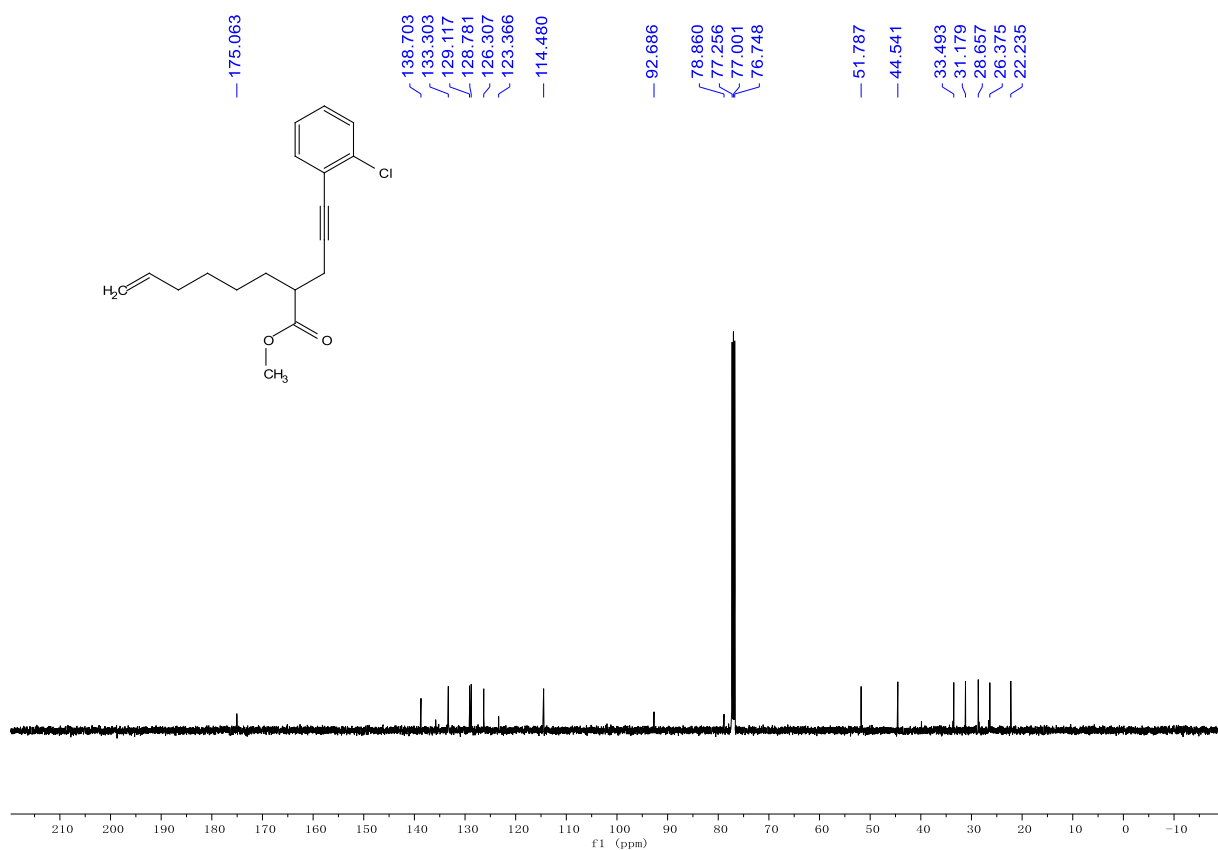

# SUPPORTING INFORMATION

## <sup>1</sup>H NMR (500 MHz, CDCl<sub>3</sub>) spectrum of compound 4aj

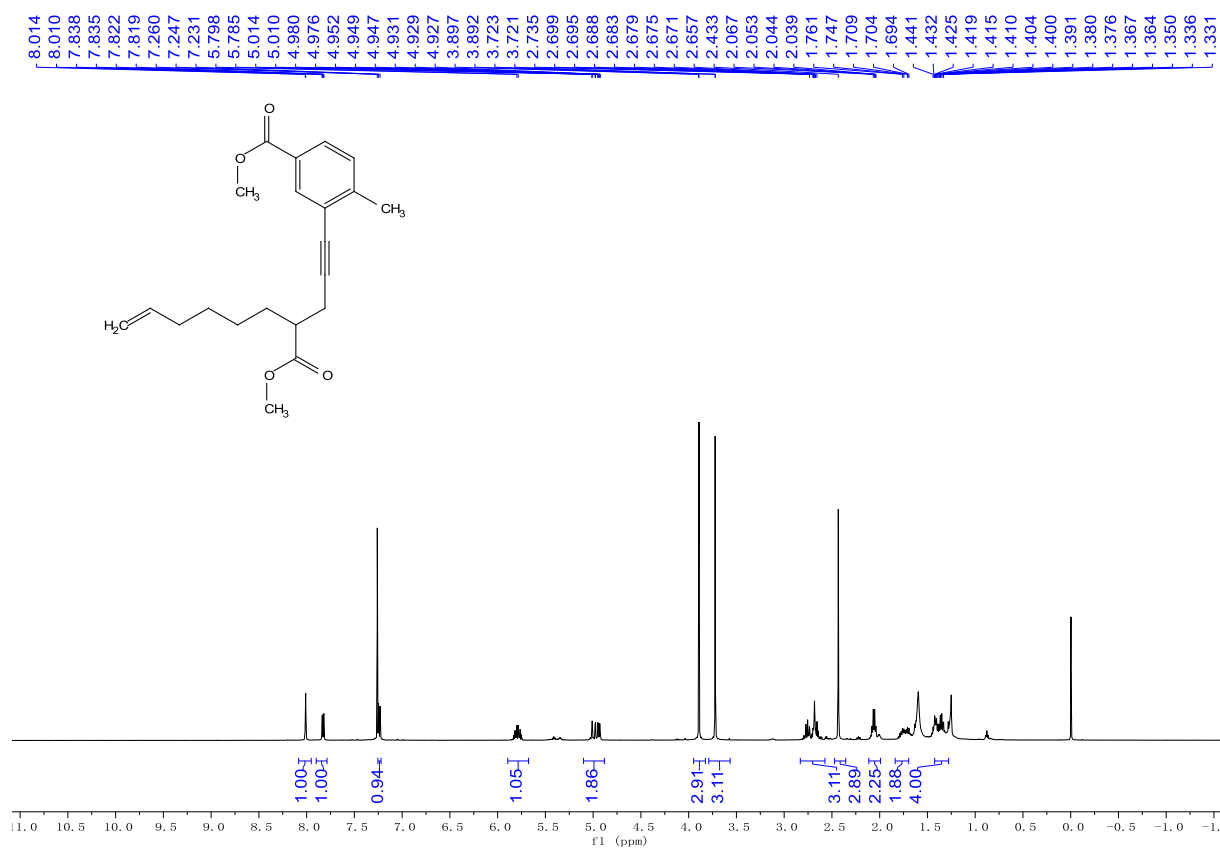

## <sup>13</sup>C NMR (125 MHz, CDCl<sub>3</sub>) spectrum of compound 4aj

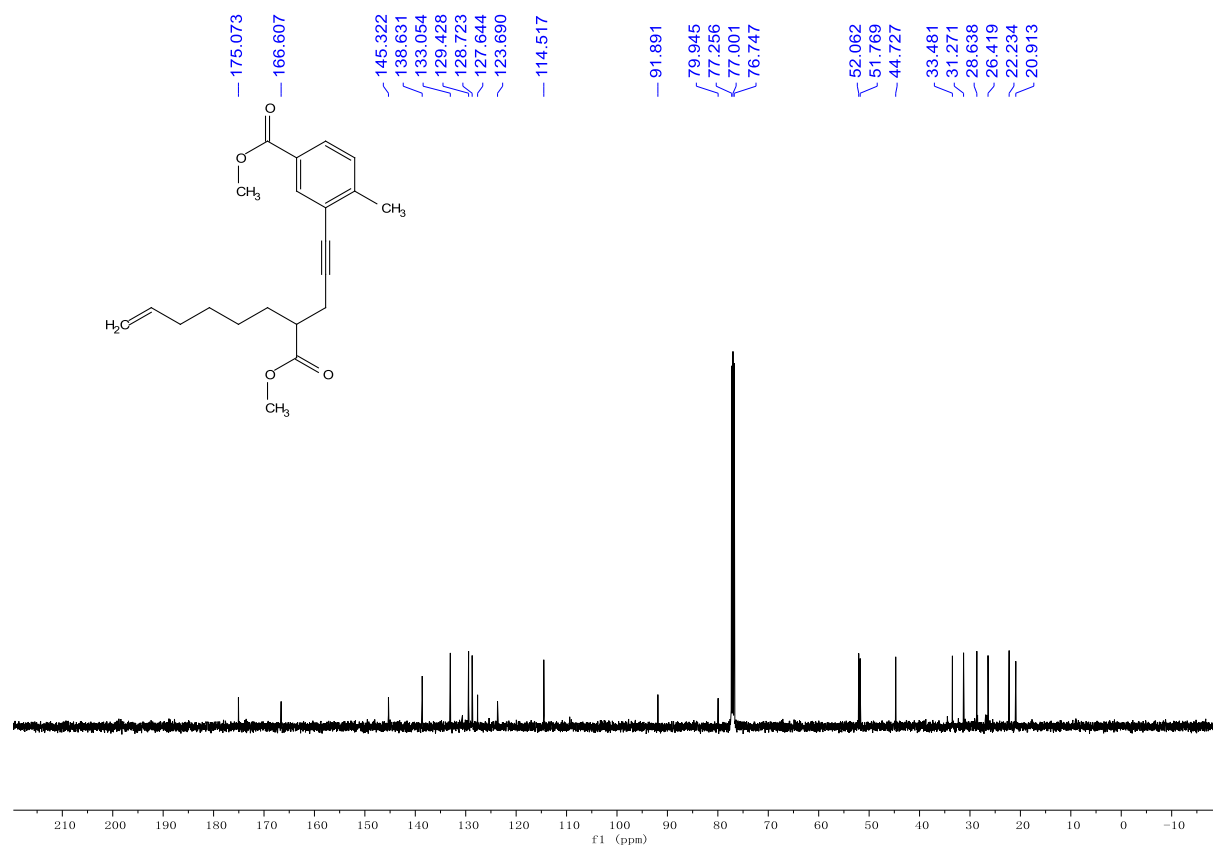

# SUPPORTING INFORMATION

## <sup>1</sup>H NMR (500 MHz, CDCl<sub>3</sub>) spectrum of compound 4ak

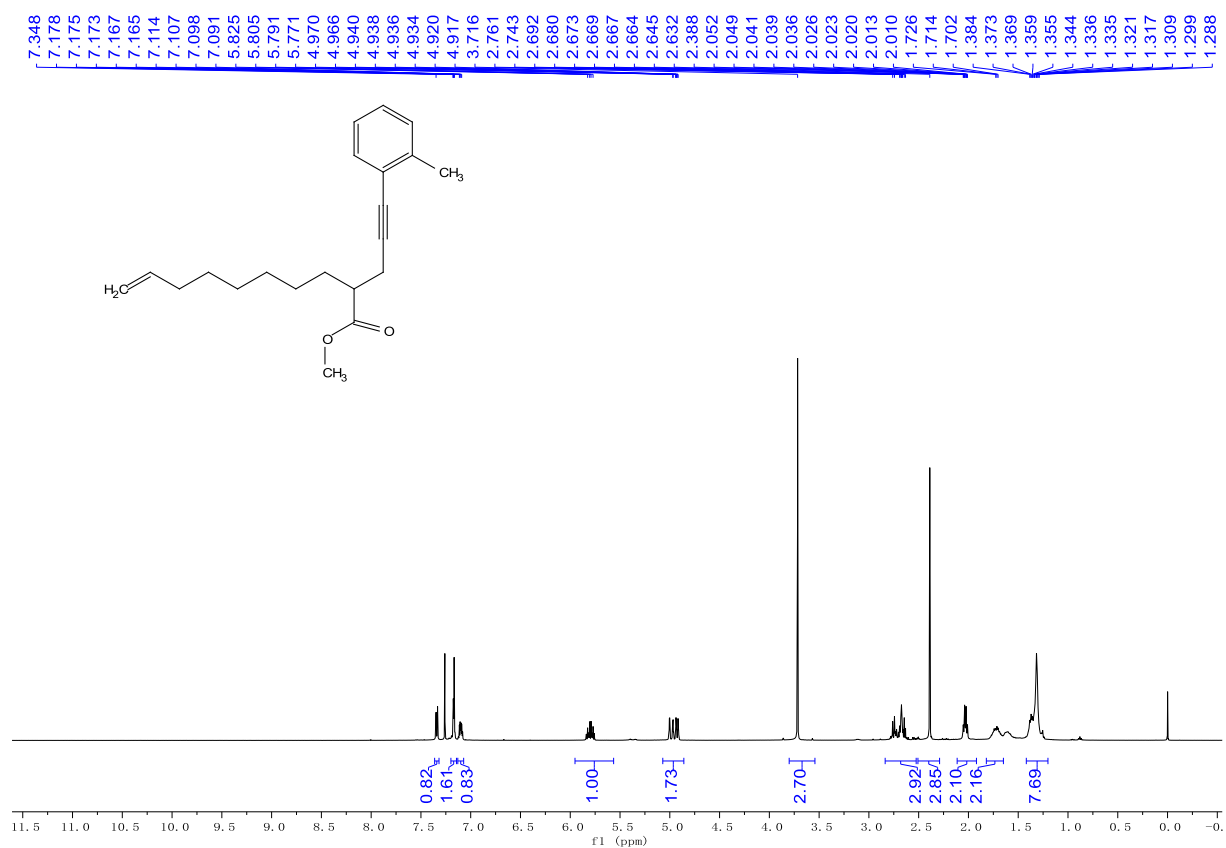

## <sup>13</sup>C NMR (125 MHz, CDCl<sub>3</sub>) spectrum of compound 4ak

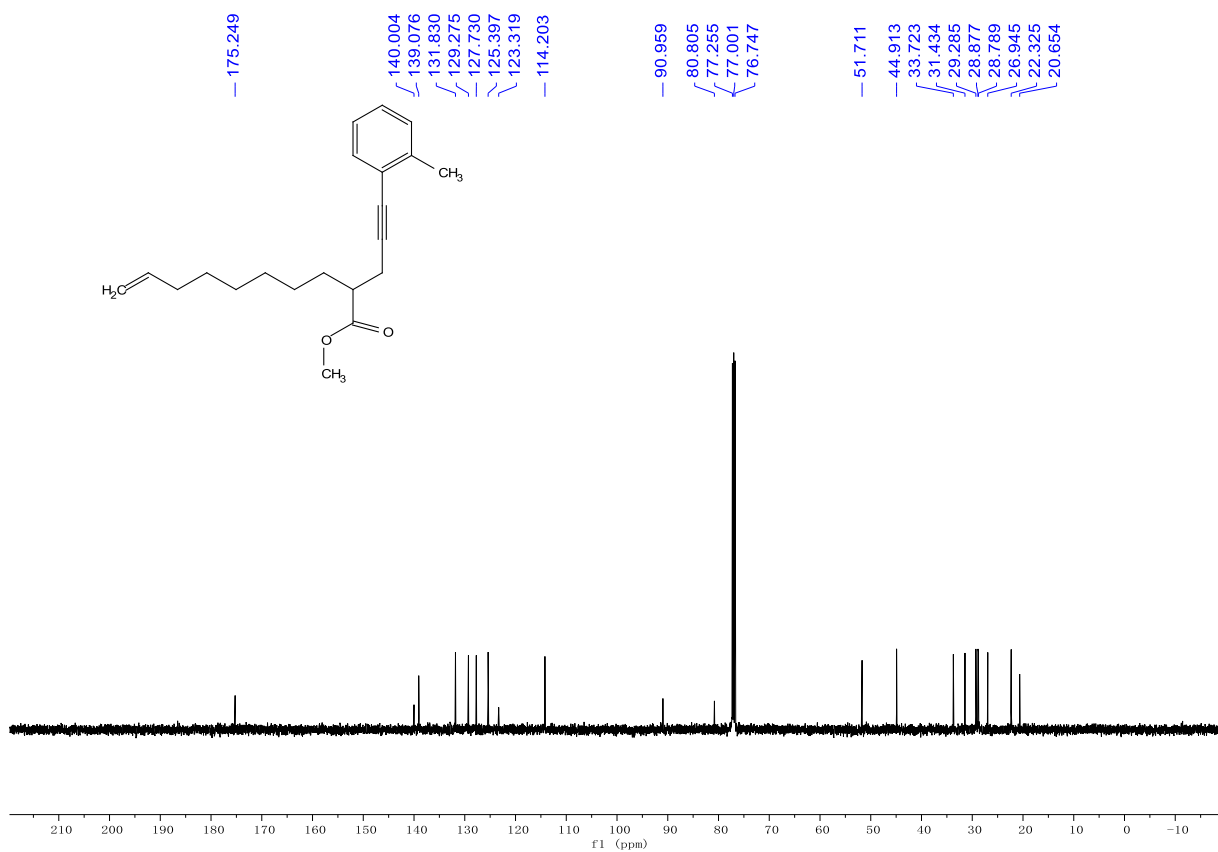

# SUPPORTING INFORMATION

## <sup>1</sup>H NMR (500 MHz, CDCl<sub>3</sub>) spectrum of compound 4al

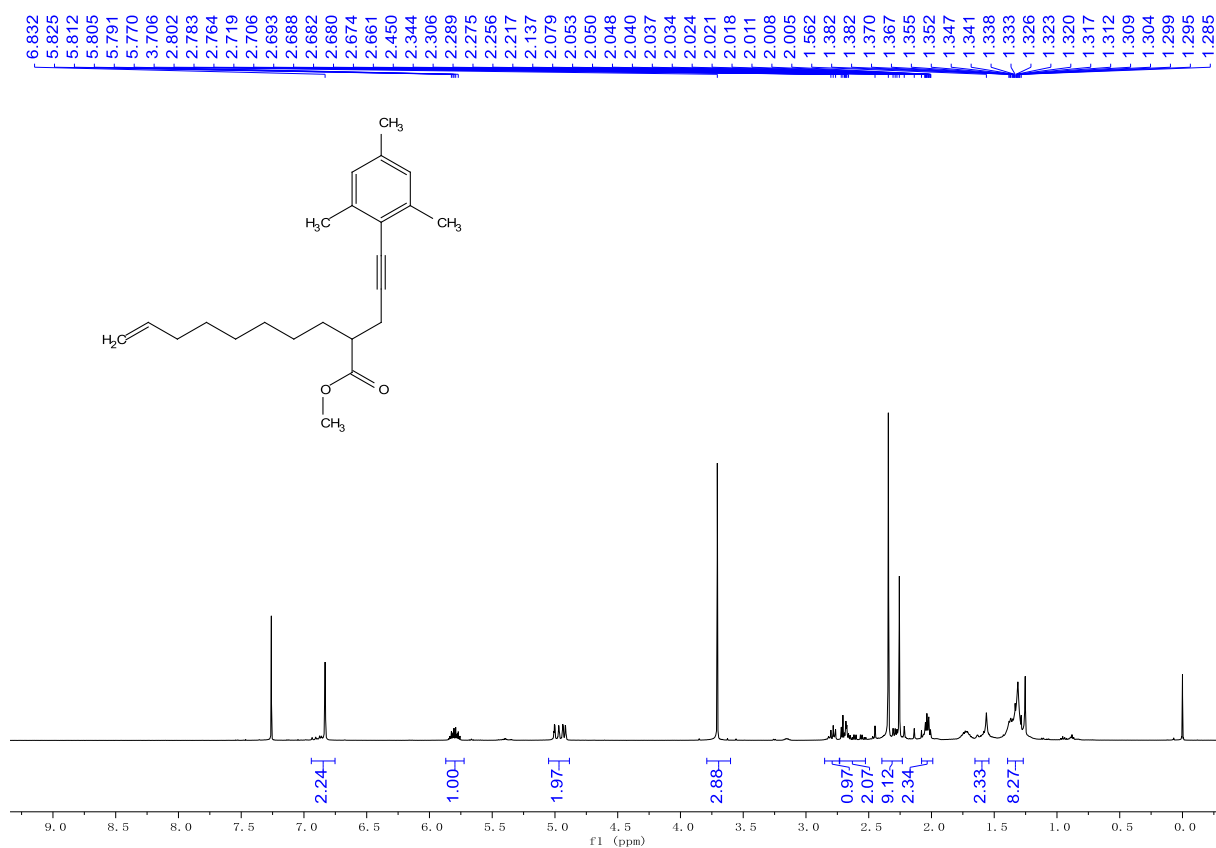

## <sup>13</sup>C NMR (125 MHz, CDCl<sub>3</sub>) spectrum of compound 4al

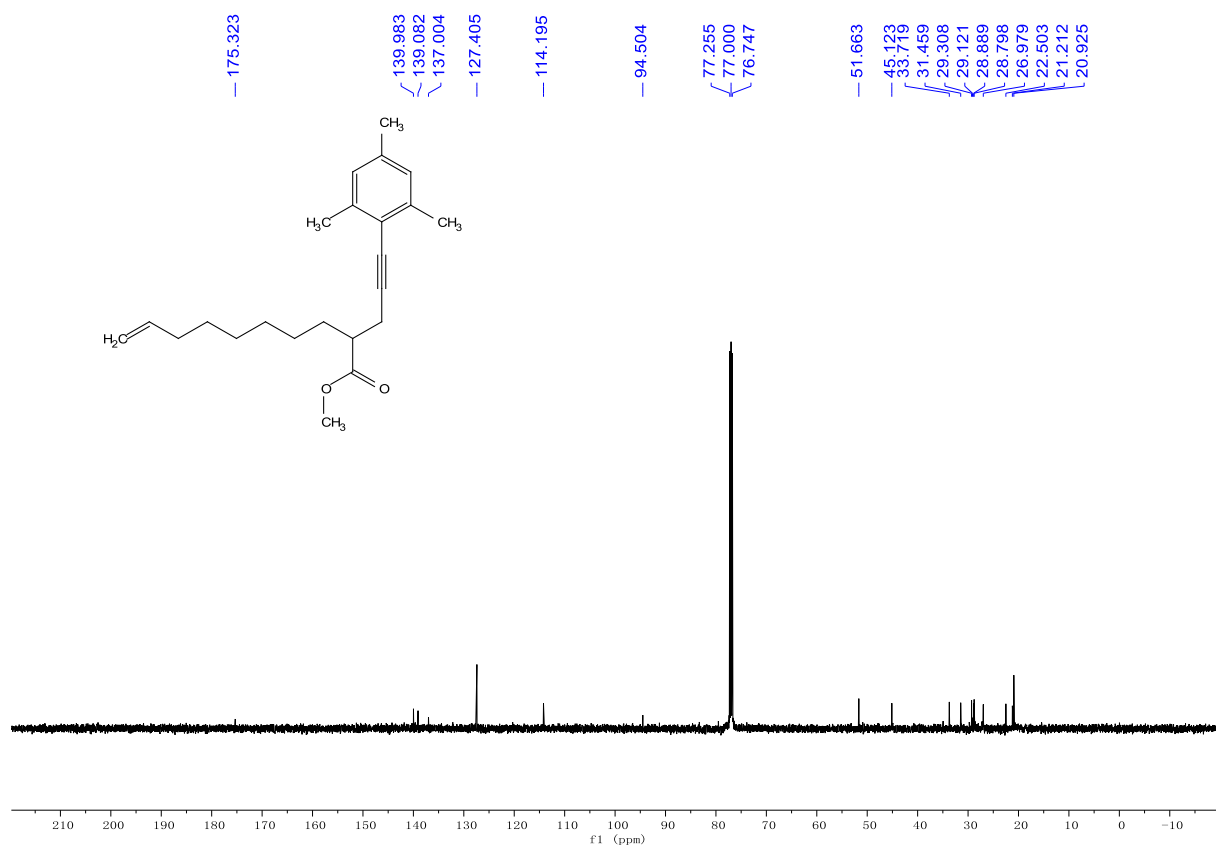

# SUPPORTING INFORMATION

## <sup>1</sup>H NMR (500 MHz, CDCl<sub>3</sub>) spectrum of compound 4am

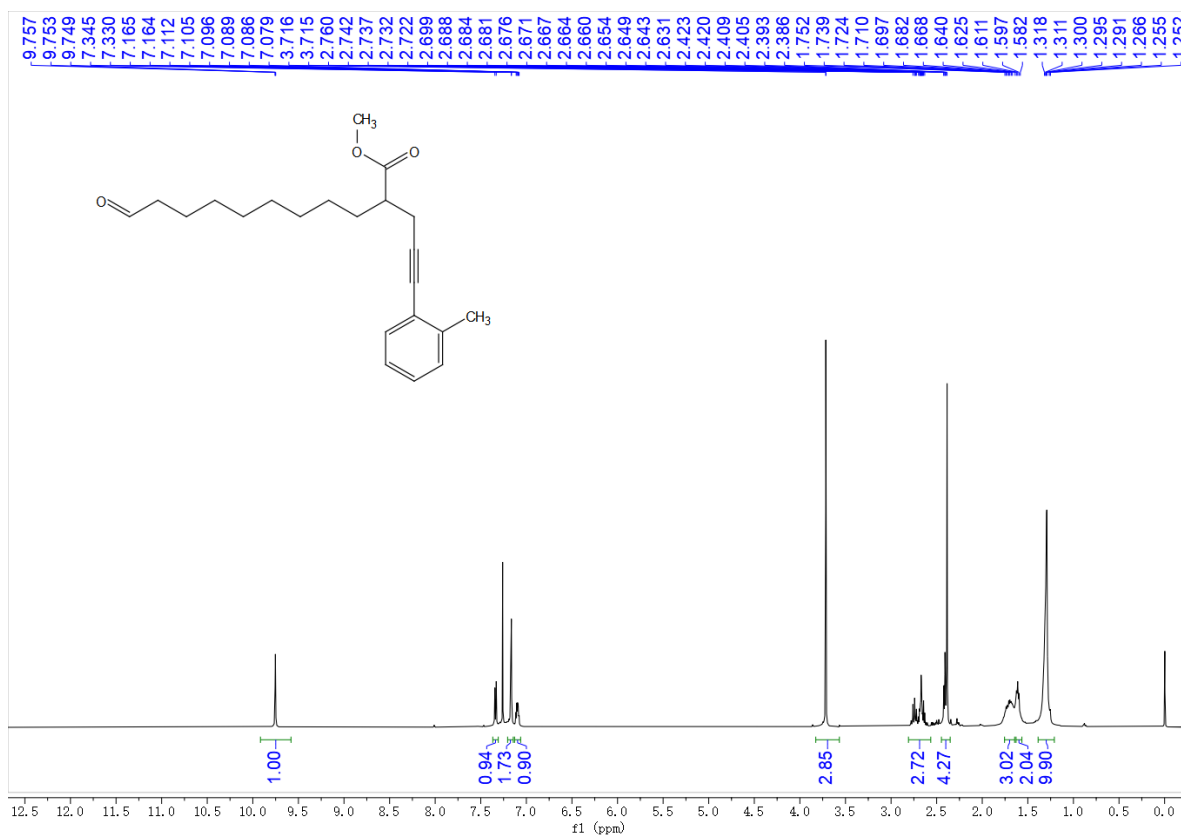

## <sup>13</sup>C NMR (125 MHz, CDCl<sub>3</sub>) spectrum of compound 4am

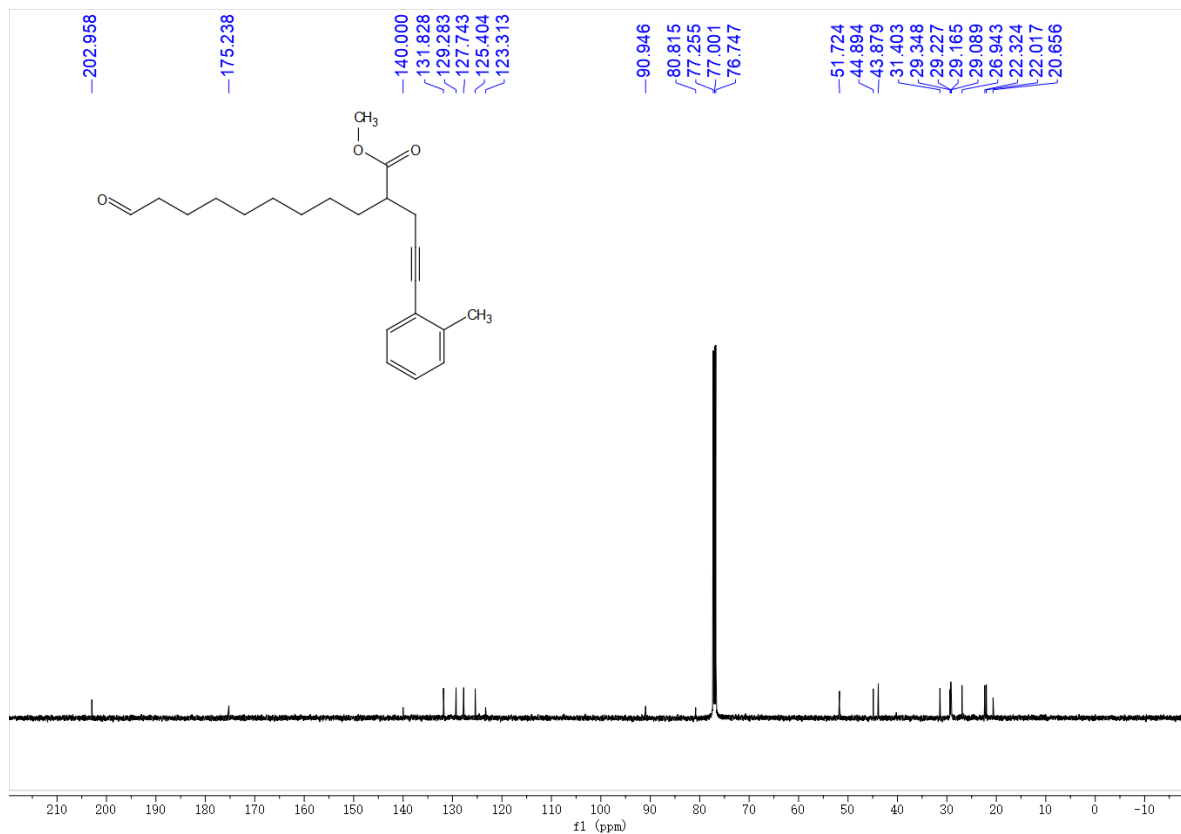

# SUPPORTING INFORMATION

## <sup>1</sup>H NMR (500 MHz, CDCl<sub>3</sub>) spectrum of compound 4an

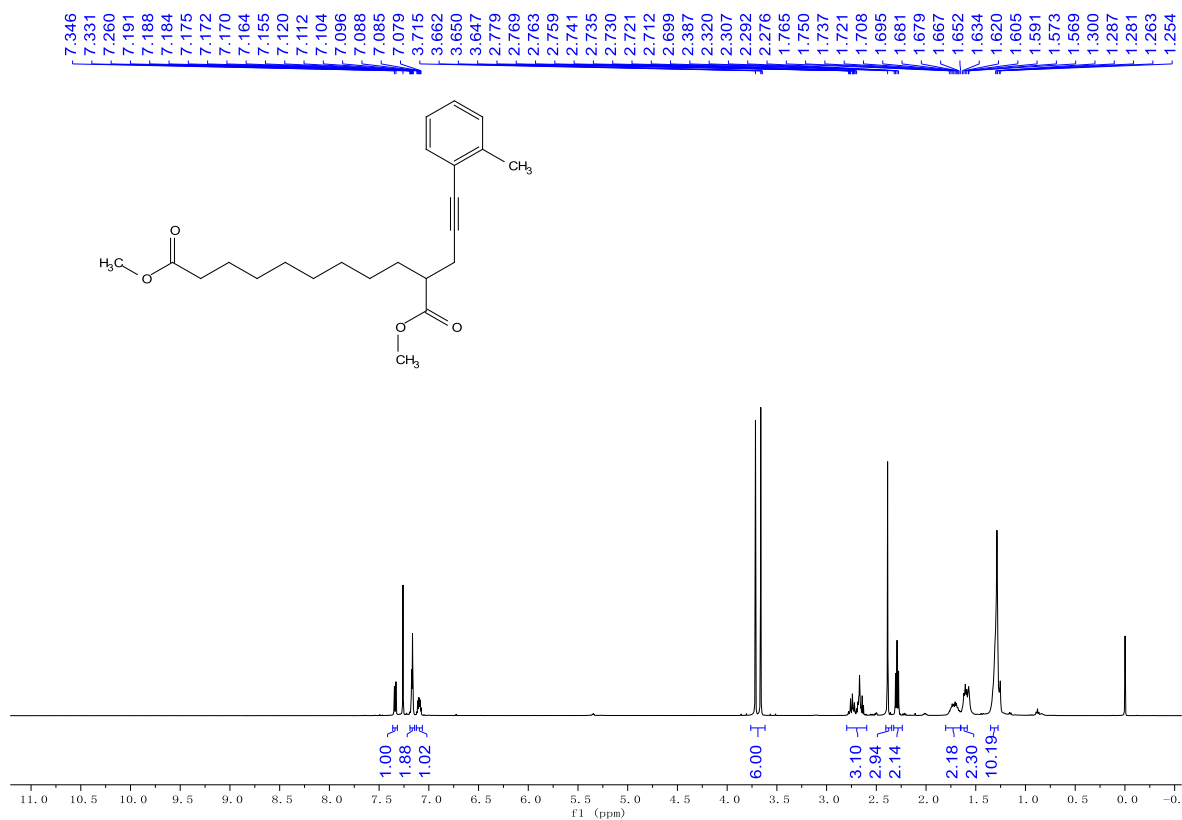

## <sup>13</sup>C NMR (125 MHz, CDCl<sub>3</sub>) spectrum of compound 4an

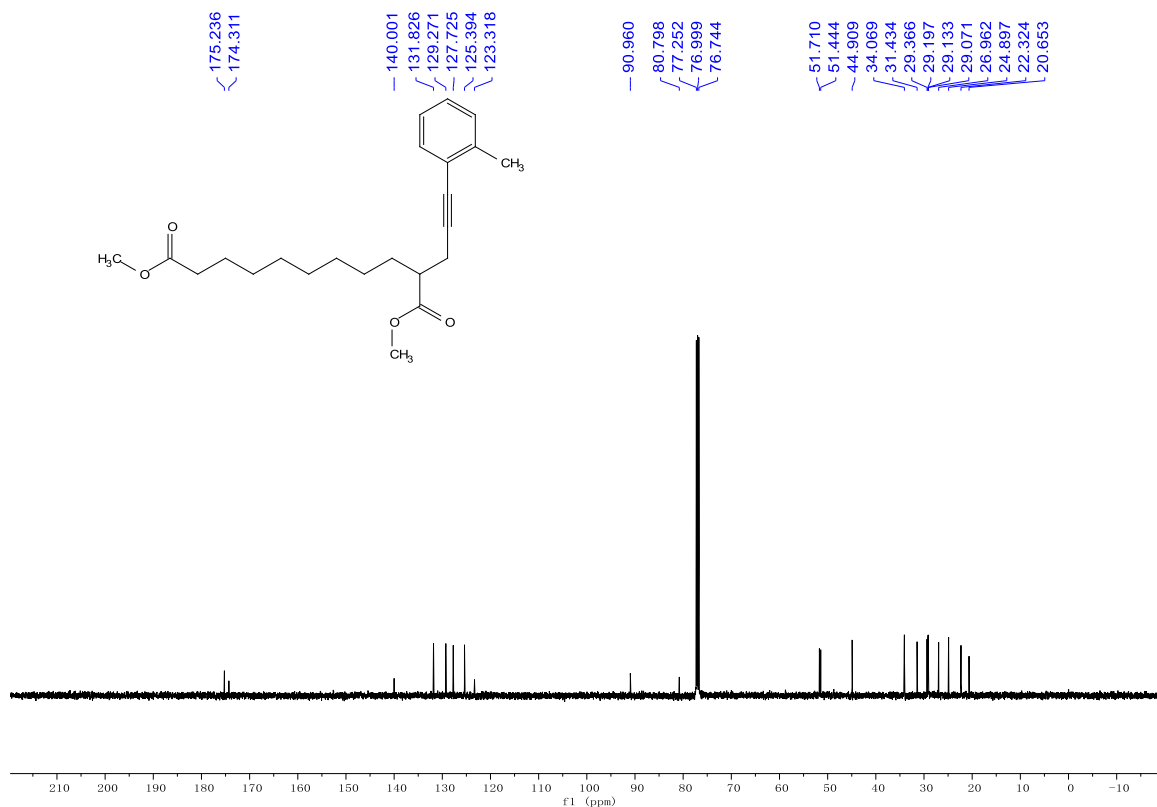



# SUPPORTING INFORMATION

## <sup>1</sup>H NMR (500 MHz, CDCl<sub>3</sub>) spectrum of compound 4ao

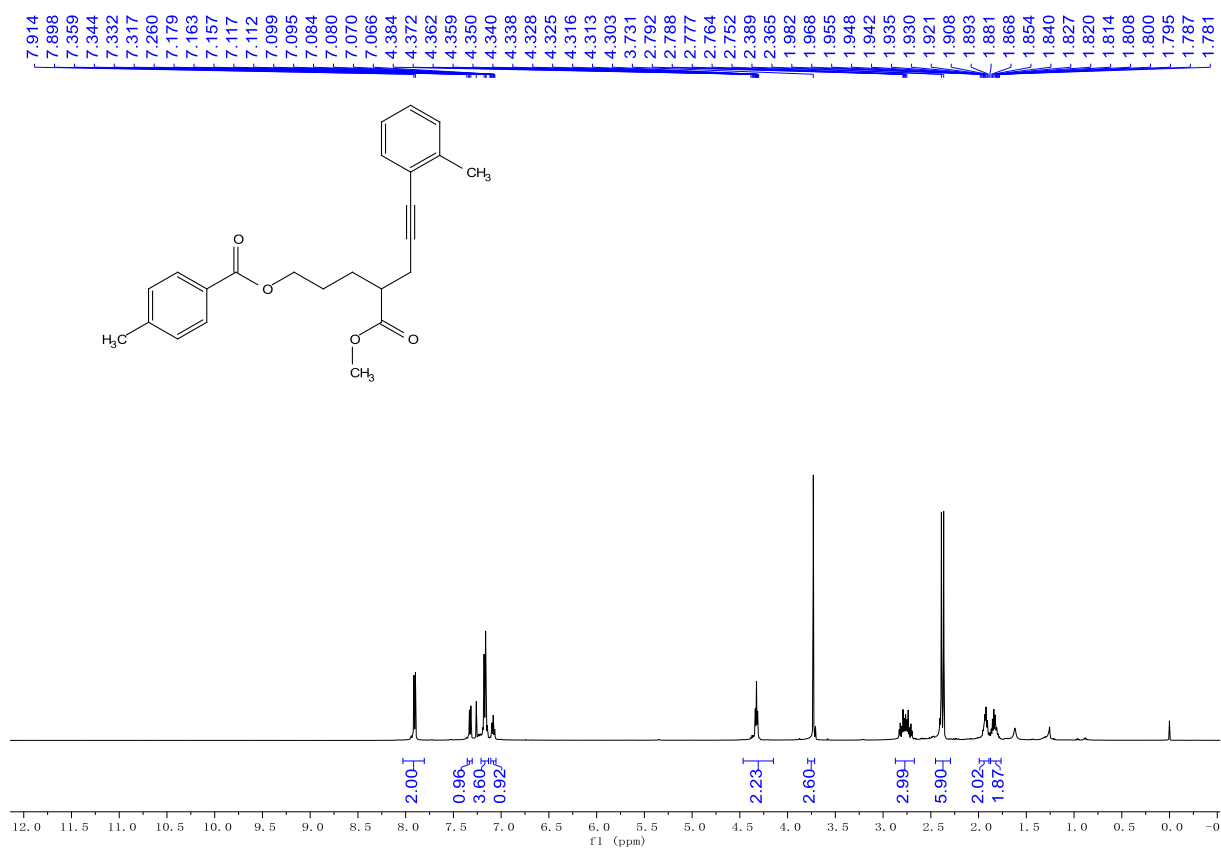

## <sup>13</sup>C NMR (125 MHz, CDCl<sub>3</sub>) spectrum of compound 4ao

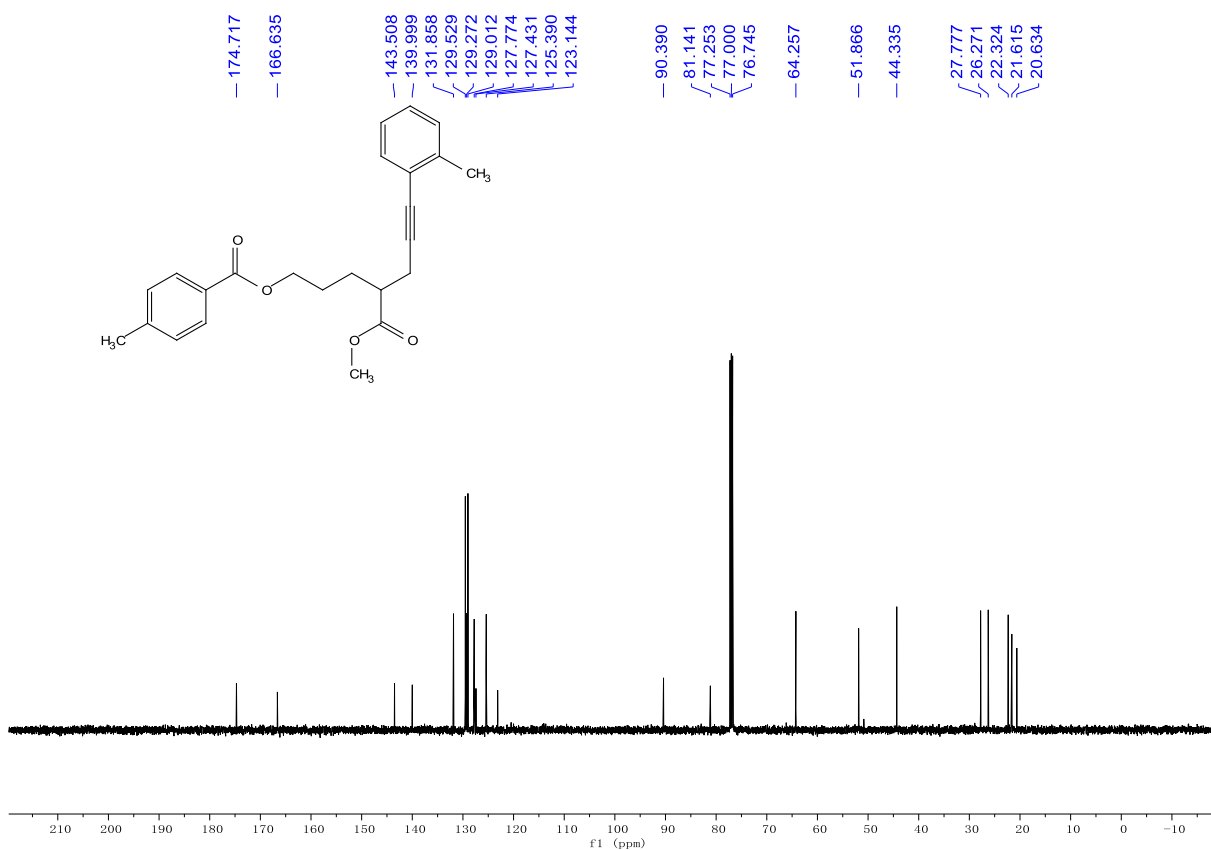

# SUPPORTING INFORMATION

## <sup>1</sup>H NMR (500 MHz, CDCl<sub>3</sub>) spectrum of compound 4ap

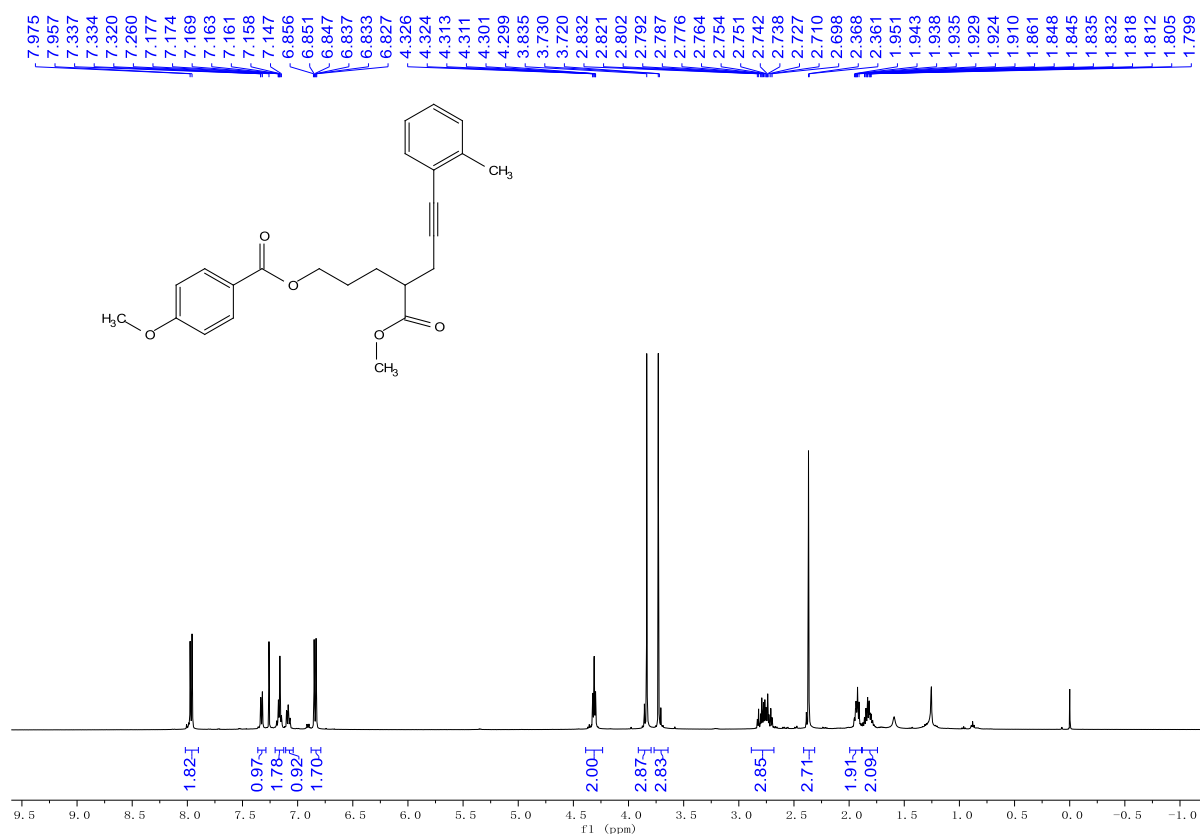

## <sup>13</sup>C NMR (125 MHz, CDCl<sub>3</sub>) spectrum of compound 4ap

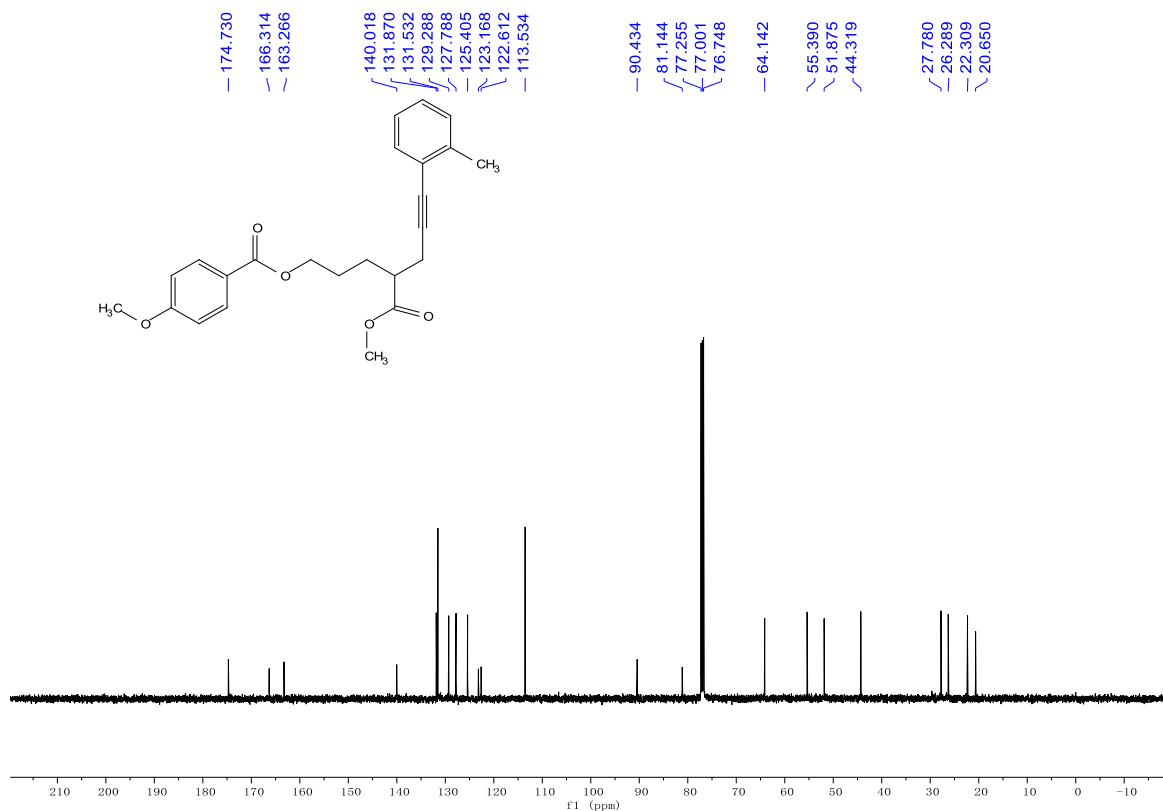

# SUPPORTING INFORMATION

## <sup>1</sup>H NMR (500 MHz, CDCl<sub>3</sub>) spectrum of compound 4aq

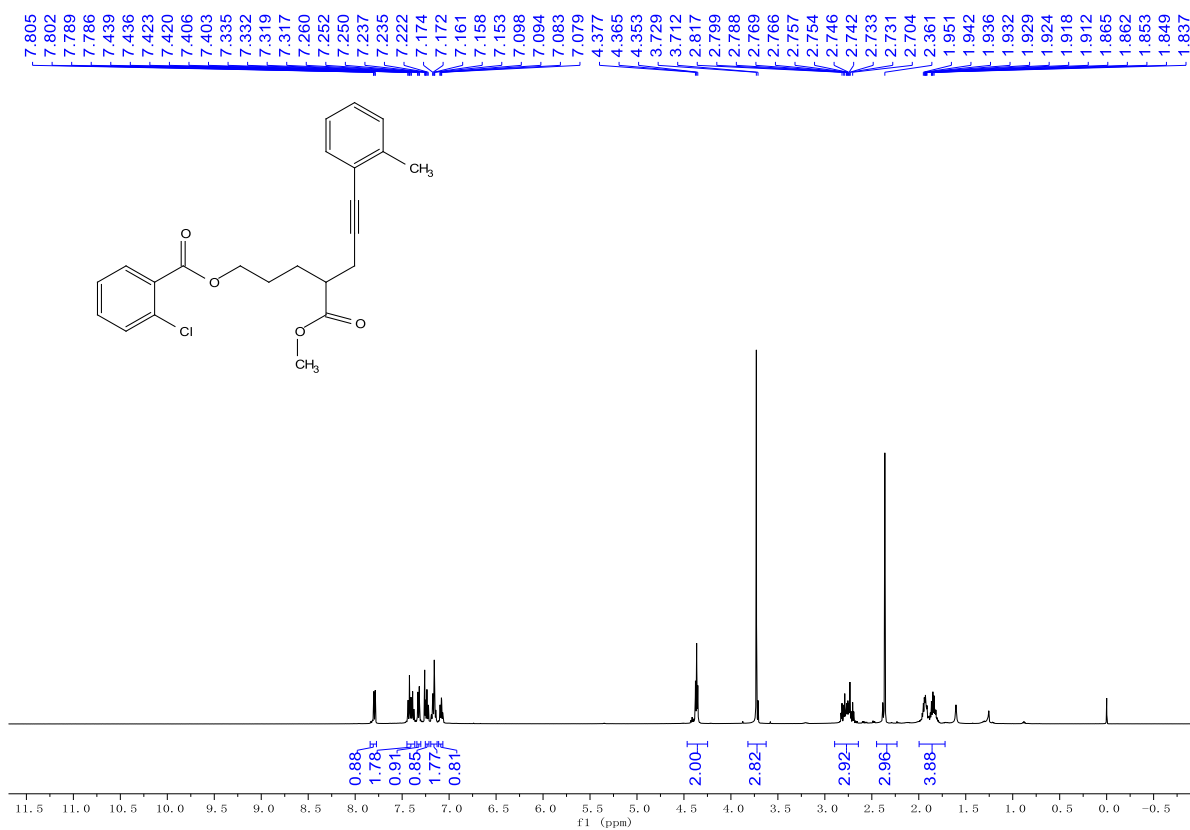

## <sup>13</sup>C NMR (125 MHz, CDCl<sub>3</sub>) spectrum of compound 4aq

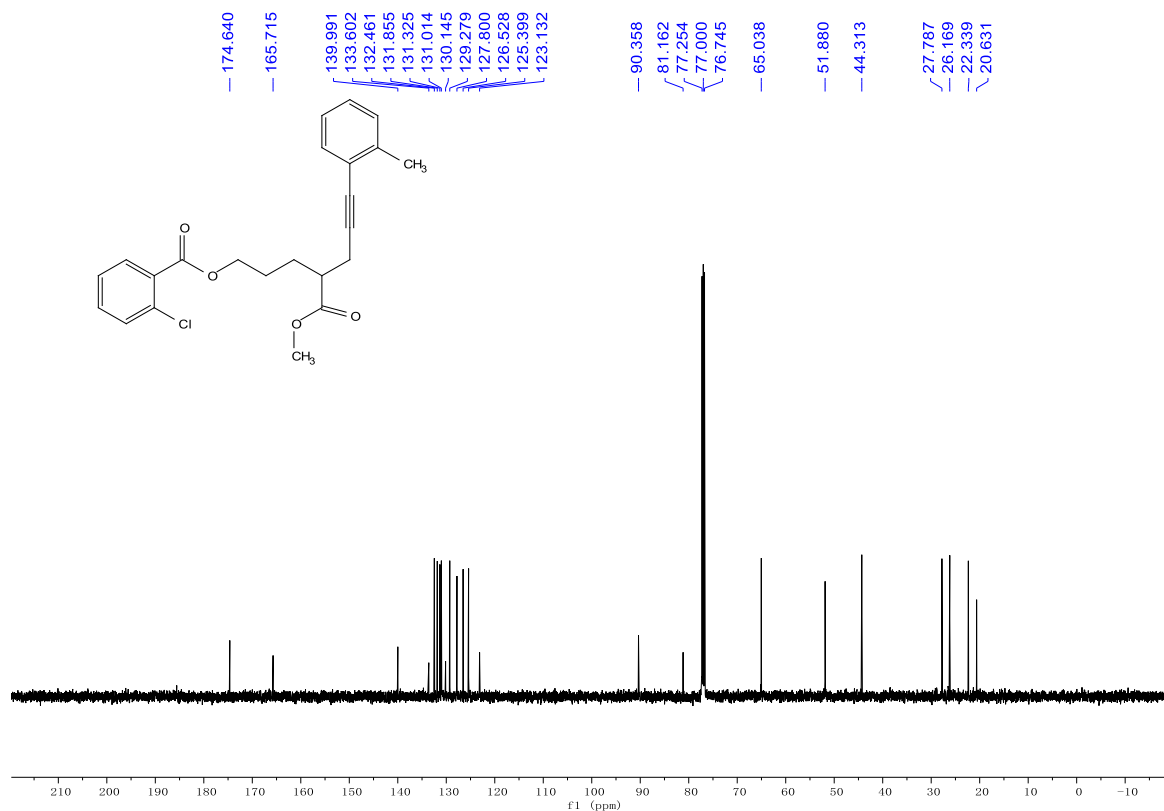

# SUPPORTING INFORMATION

## <sup>1</sup>H NMR (500 MHz, CDCl<sub>3</sub>) spectrum of compound 4ar

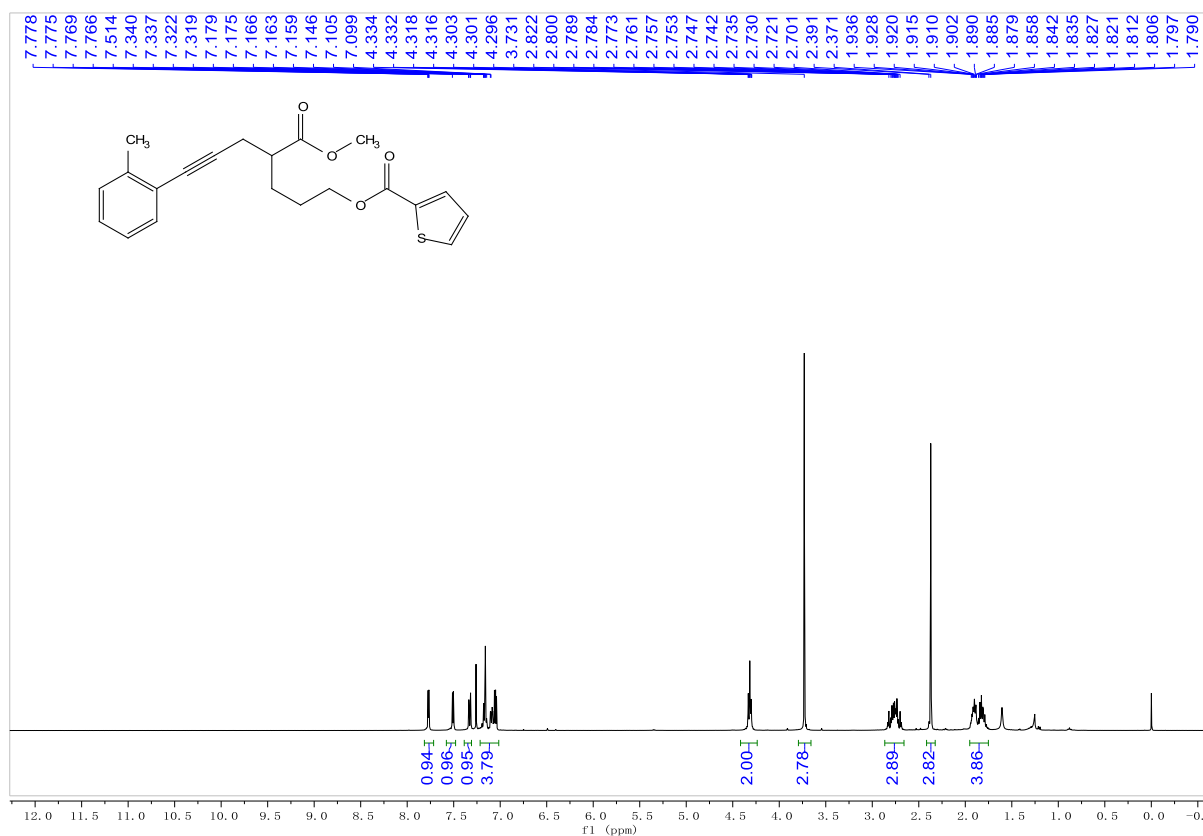

## <sup>13</sup>C NMR (125 MHz, CDCl<sub>3</sub>) spectrum of compound 4ar

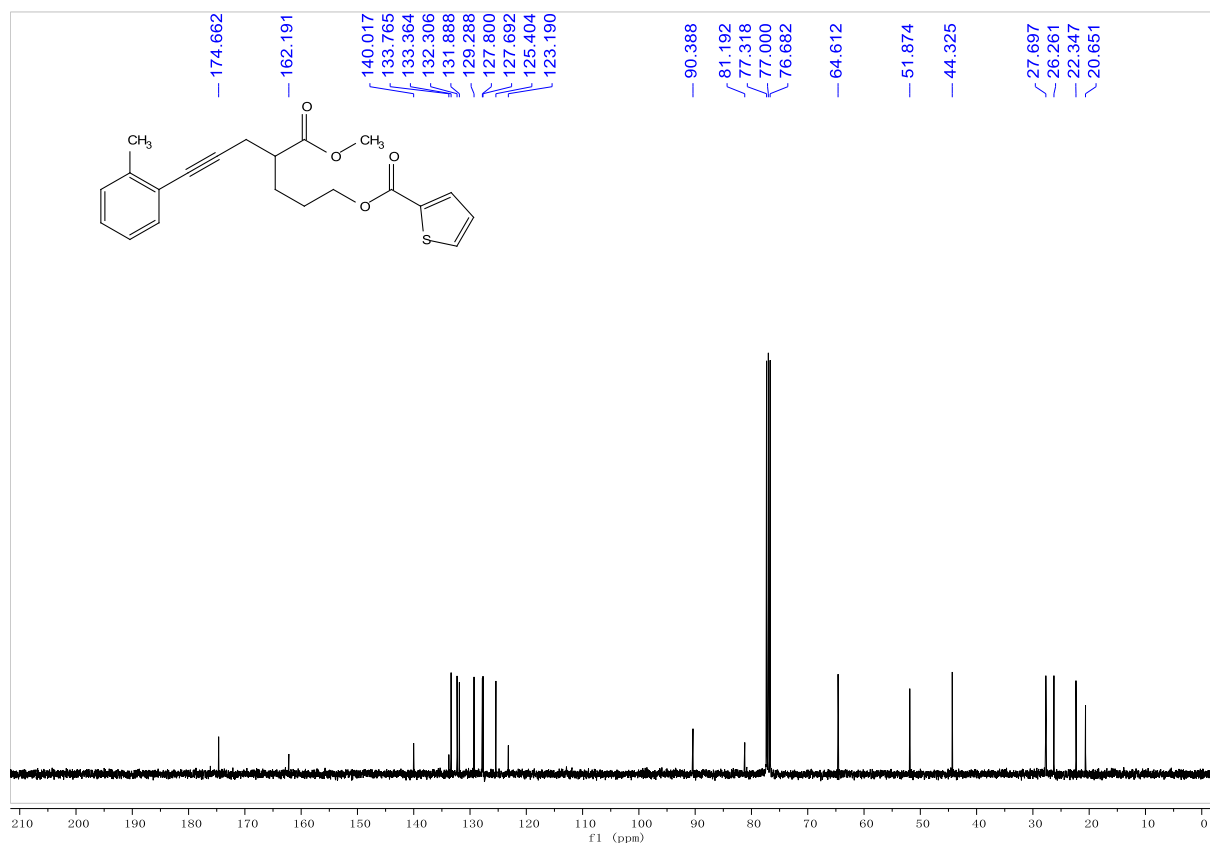

# SUPPORTING INFORMATION

## <sup>1</sup>H NMR (500 MHz, CDCl<sub>3</sub>) spectrum of compound 4as

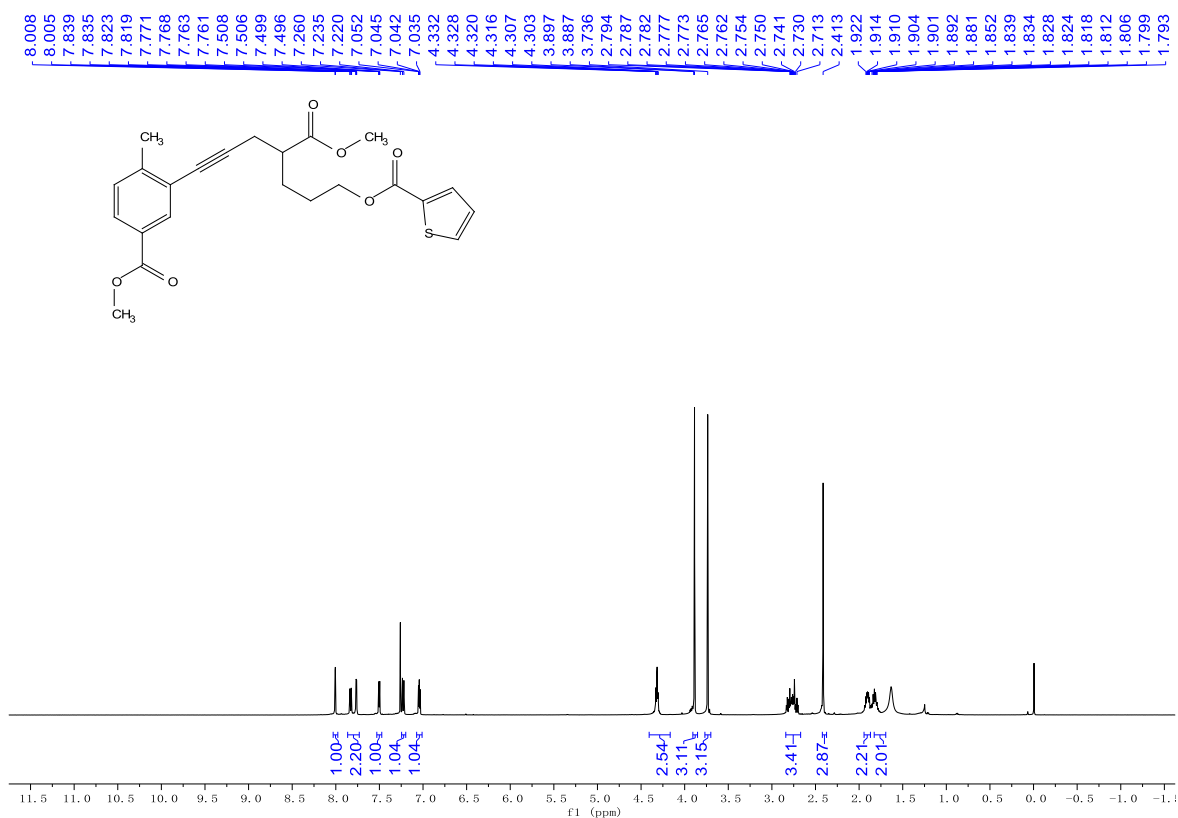

## <sup>13</sup>C NMR (125 MHz, CDCl<sub>3</sub>) spectrum of compound 4as

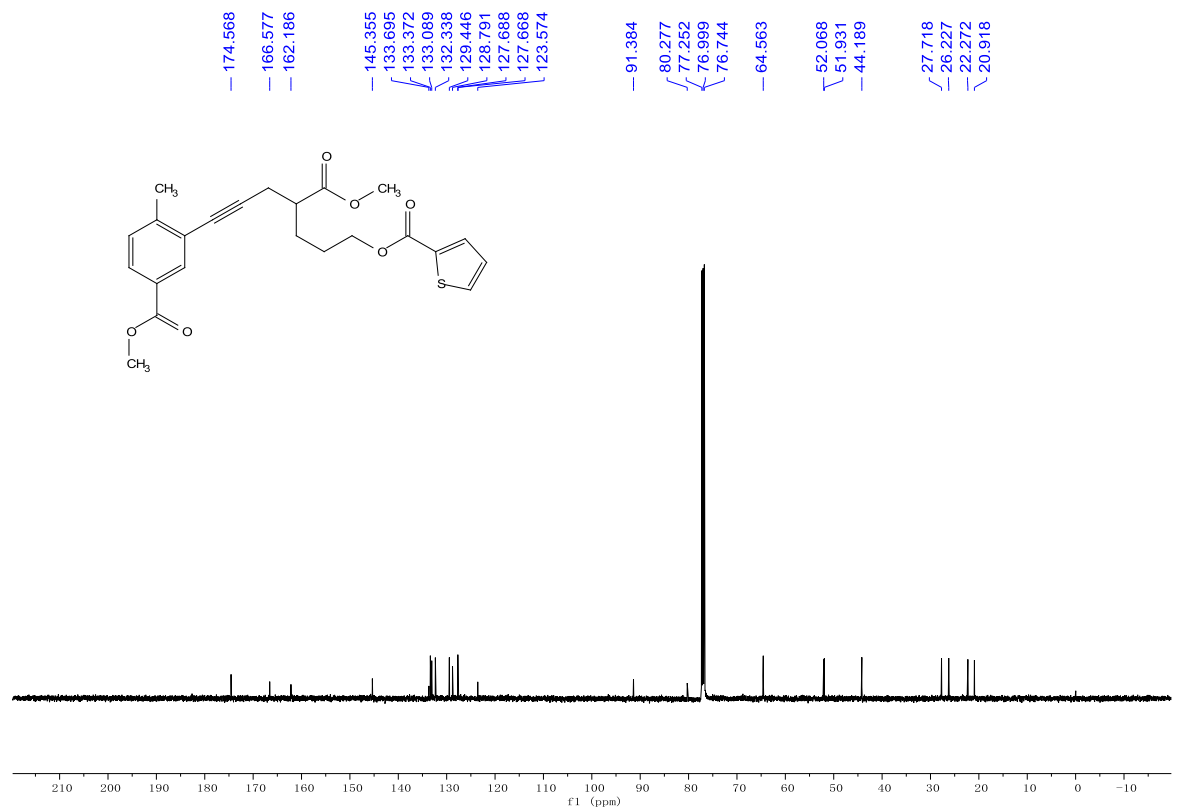

# SUPPORTING INFORMATION

## <sup>1</sup>H NMR (500 MHz, CDCl<sub>3</sub>) spectrum of compound 4at

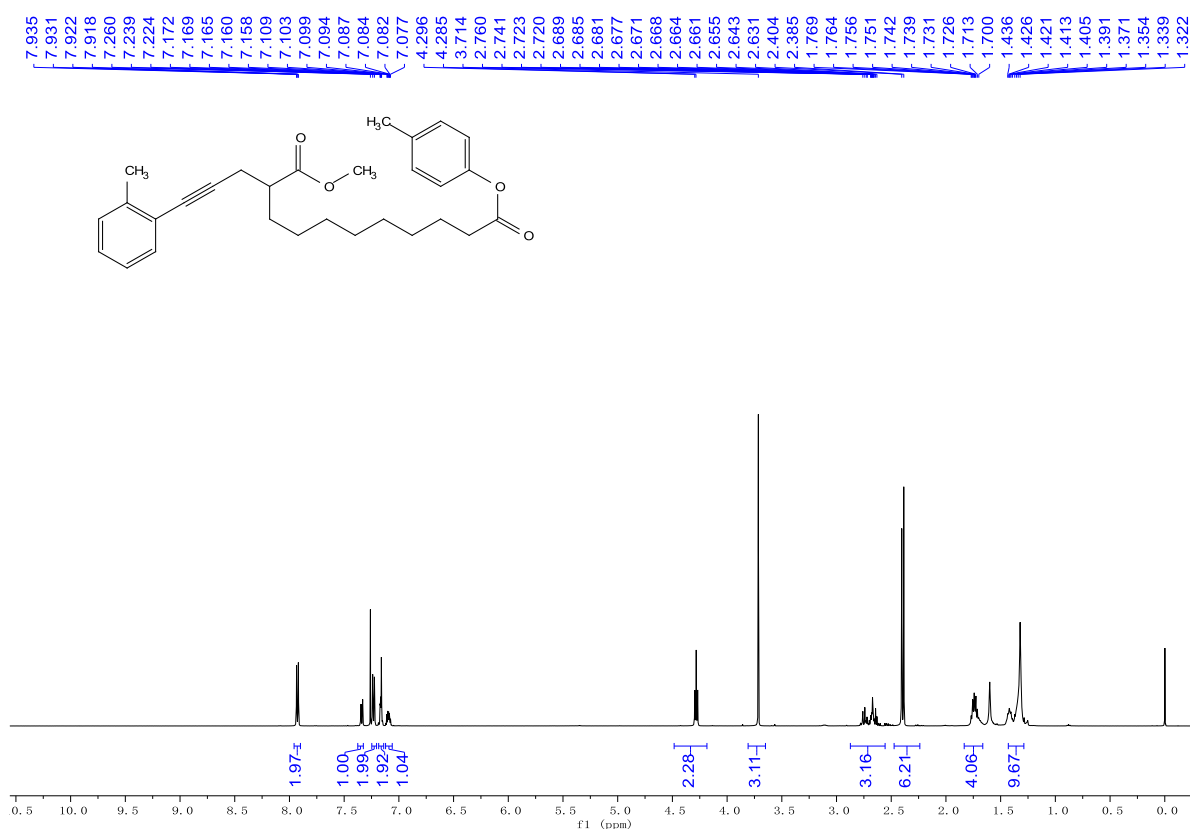

## <sup>13</sup>C NMR (125 MHz, CDCl<sub>3</sub>) spectrum of compound 4at

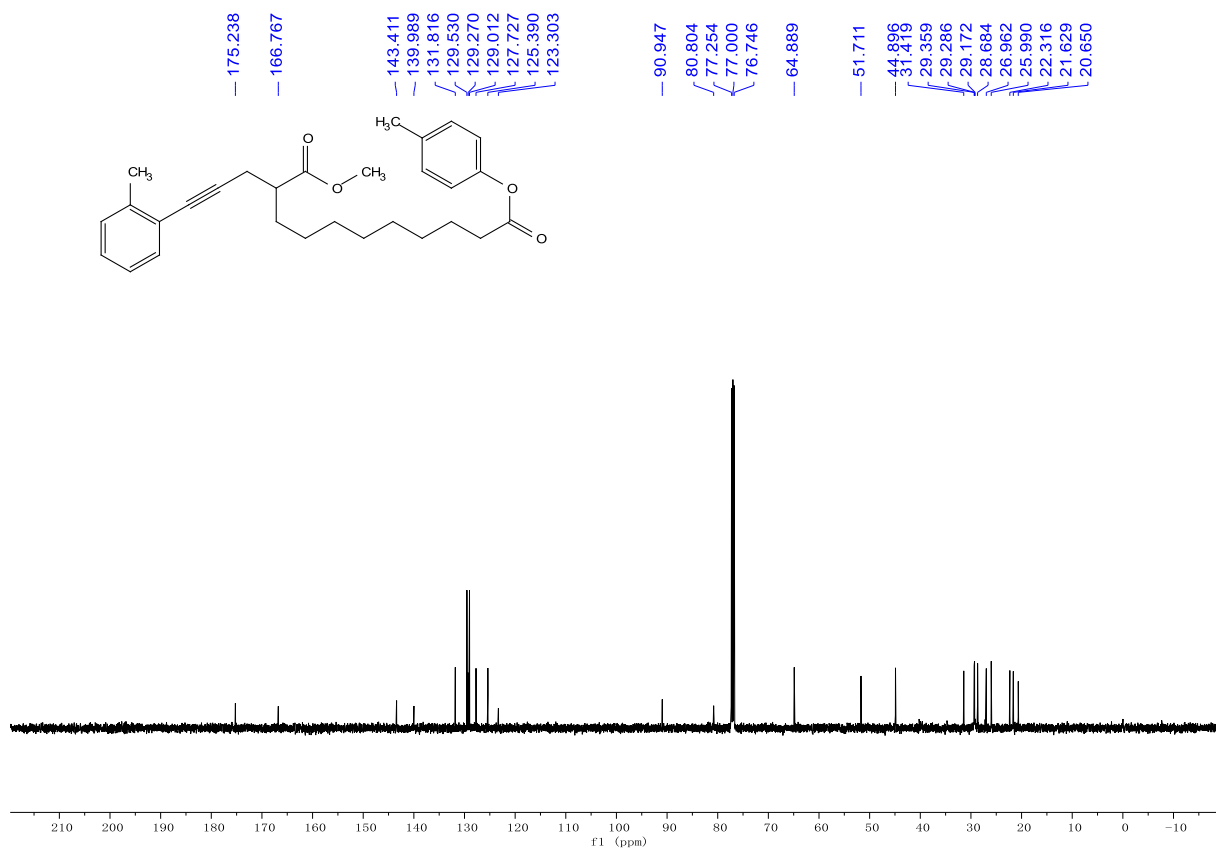

# SUPPORTING INFORMATION

## <sup>1</sup>H NMR (500 MHz, CDCl<sub>3</sub>) spectrum of compound 4au

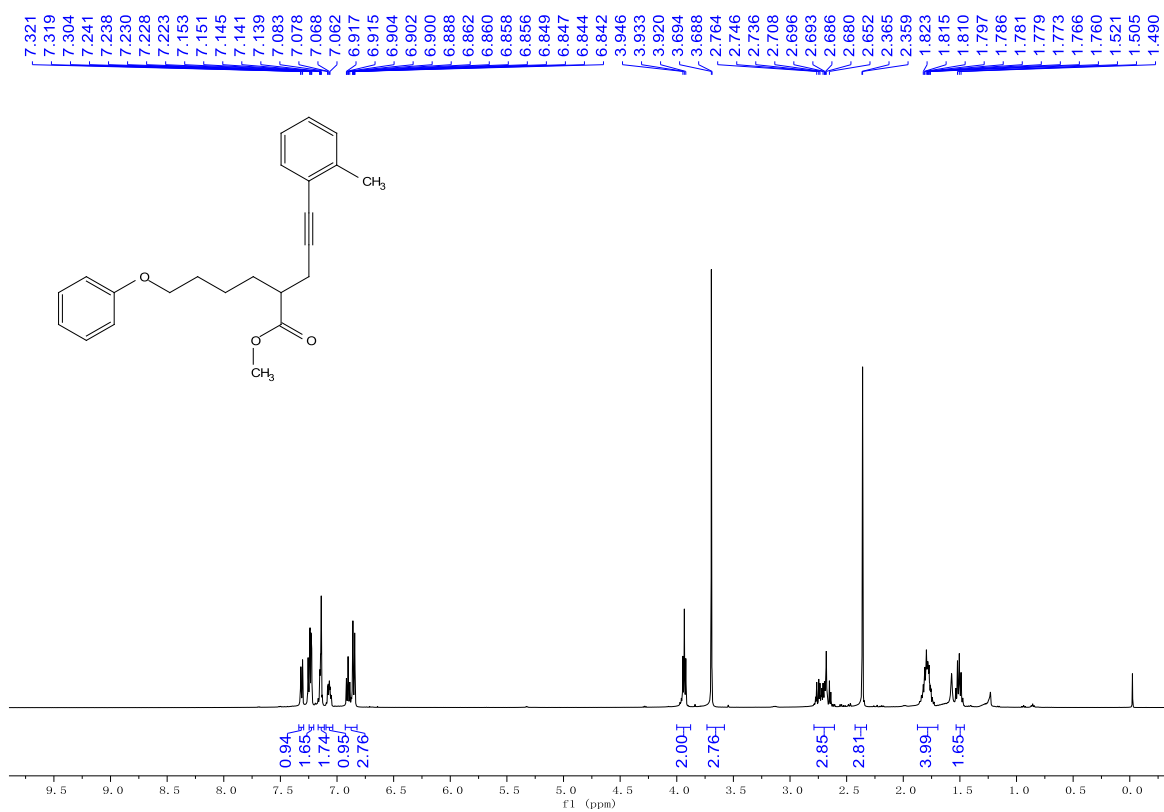

## <sup>13</sup>C NMR (125 MHz, CDCl<sub>3</sub>) spectrum of compound 4au

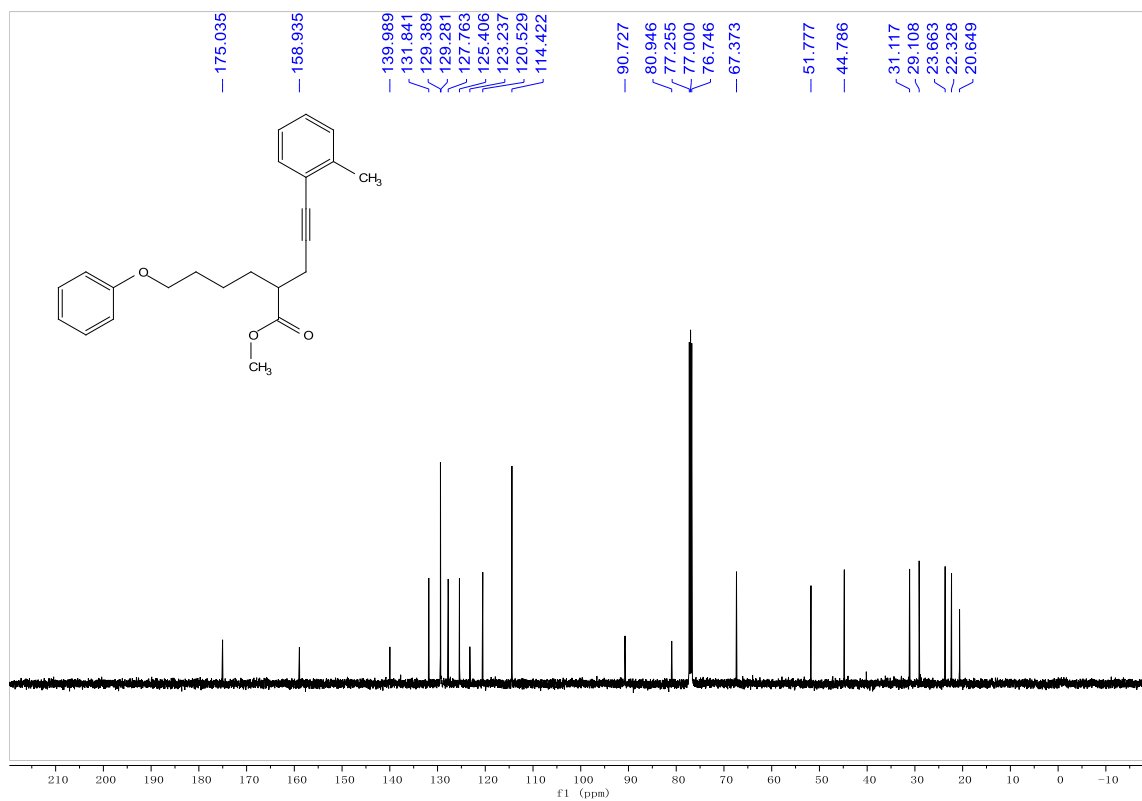

# SUPPORTING INFORMATION

## <sup>1</sup>H NMR (500 MHz, CDCl<sub>3</sub>) spectrum of compound 4av

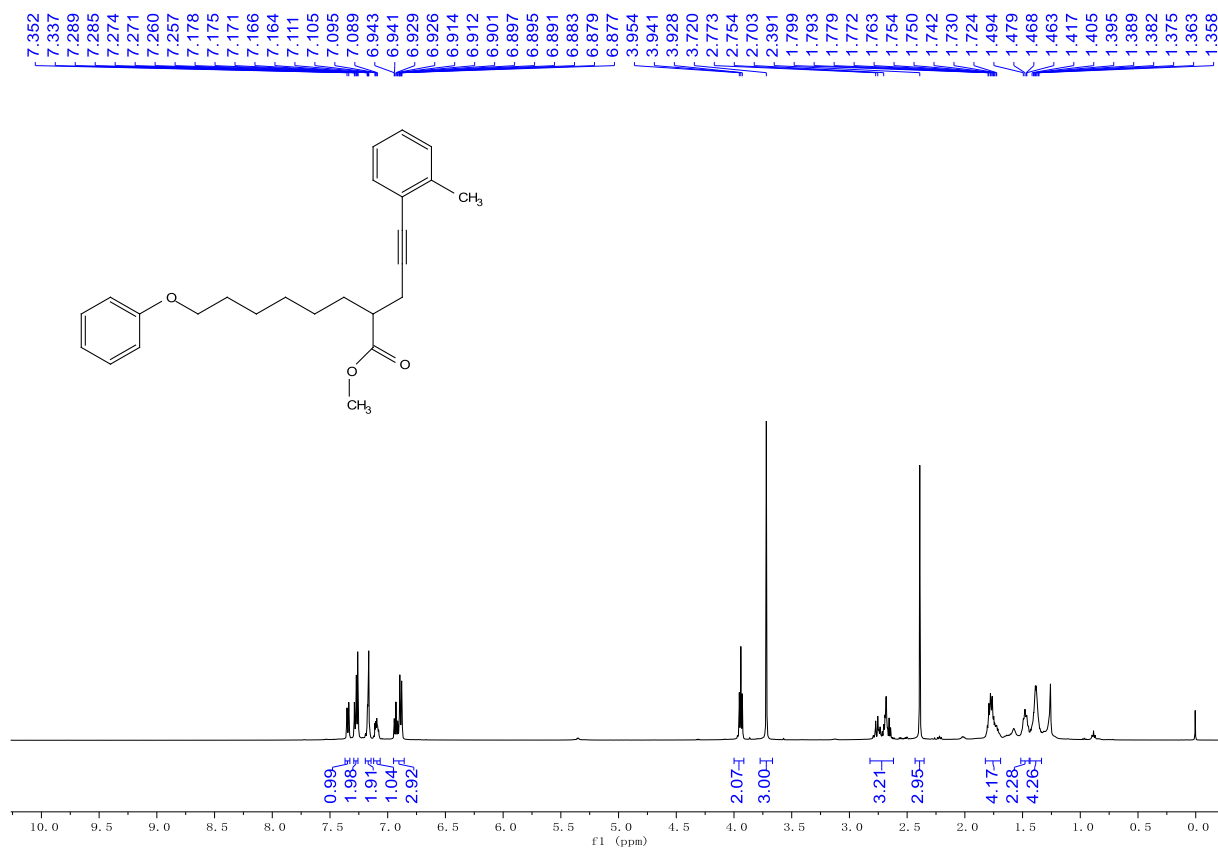

## <sup>13</sup>C NMR (125 MHz, CDCl<sub>3</sub>) spectrum of compound 4av

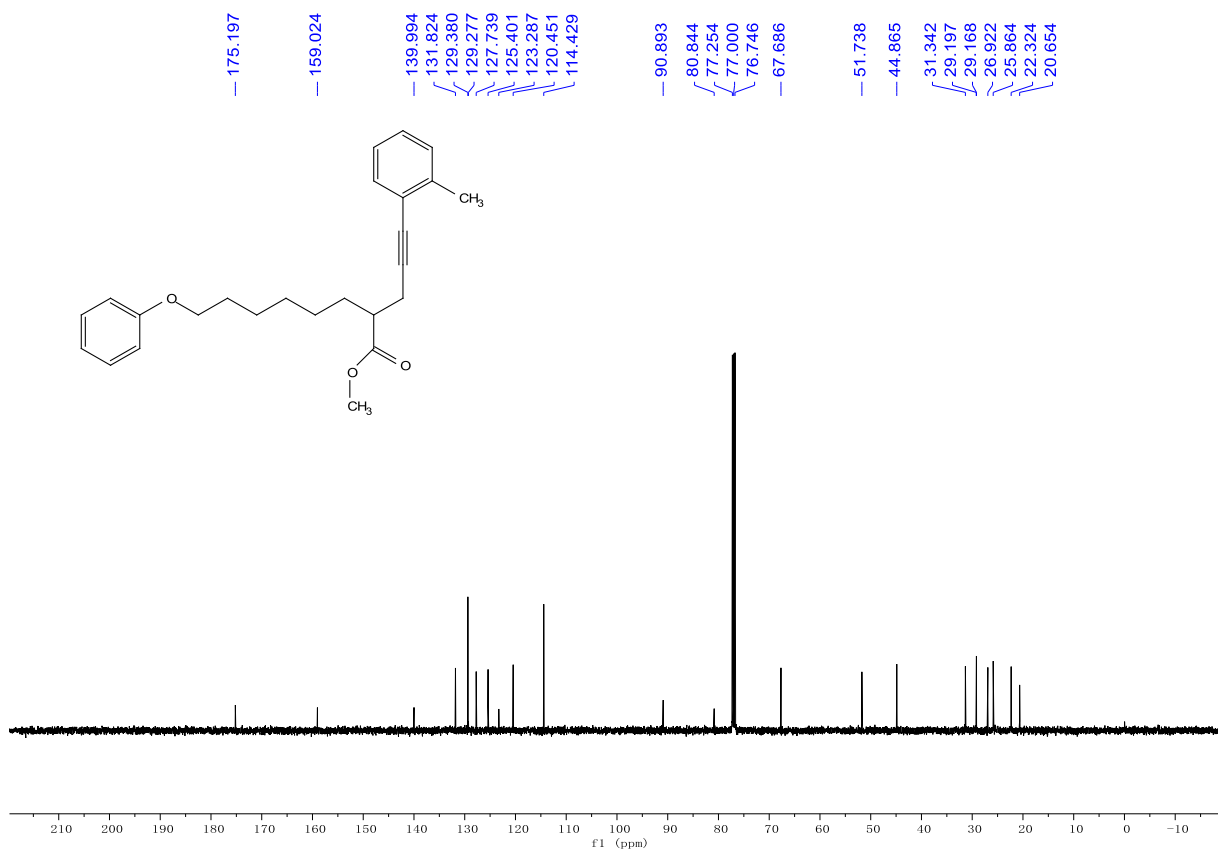



# SUPPORTING INFORMATION

## <sup>1</sup>H NMR (500 MHz, CDCl<sub>3</sub>) spectrum of compound 4aw

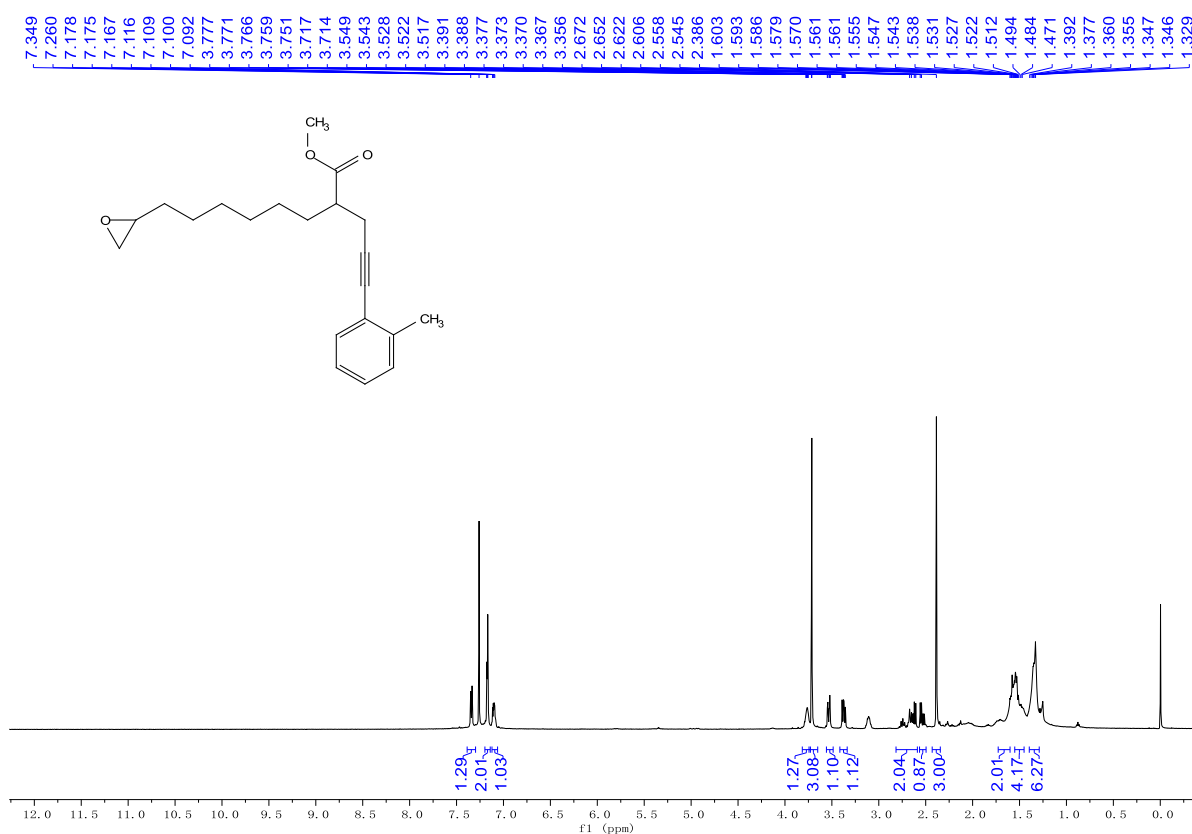

## <sup>13</sup>C NMR (125 MHz, CDCl<sub>3</sub>) spectrum of compound 4aw

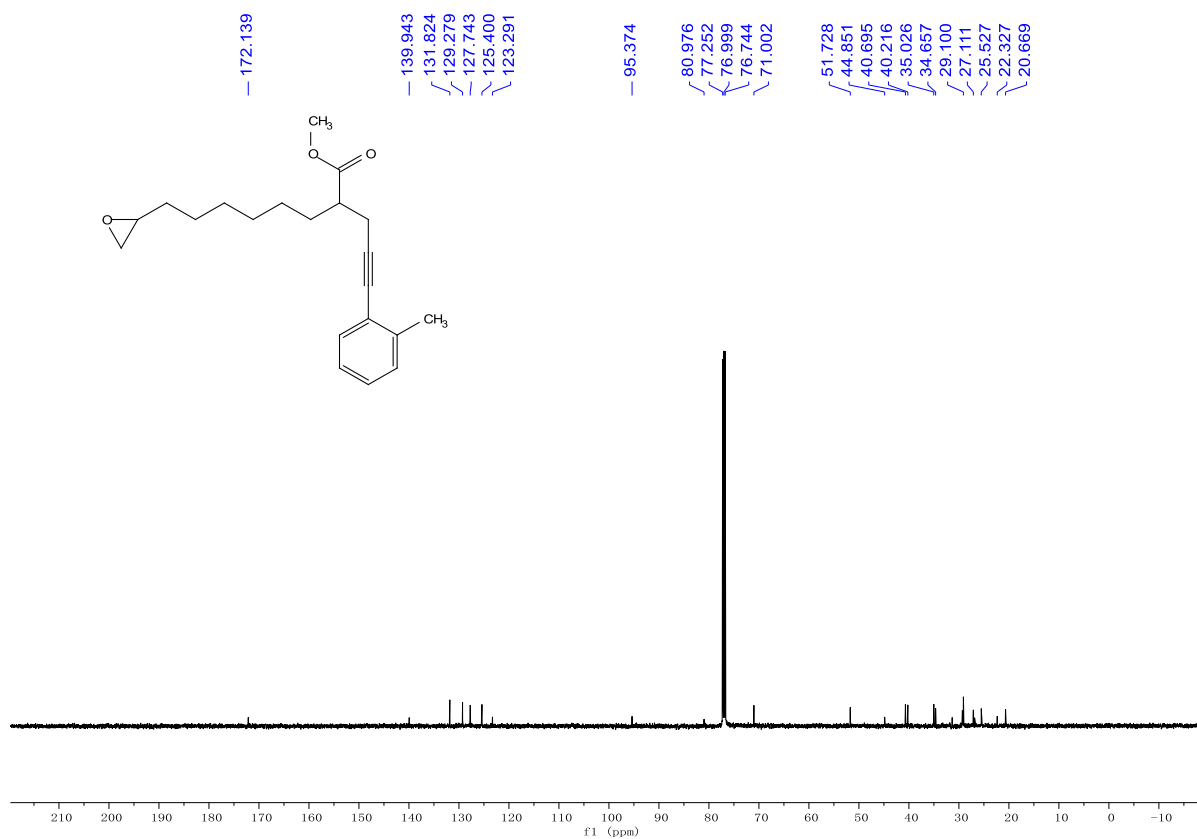

# SUPPORTING INFORMATION

## <sup>1</sup>H NMR (500 MHz, CDCl<sub>3</sub>) spectrum of compound 6a

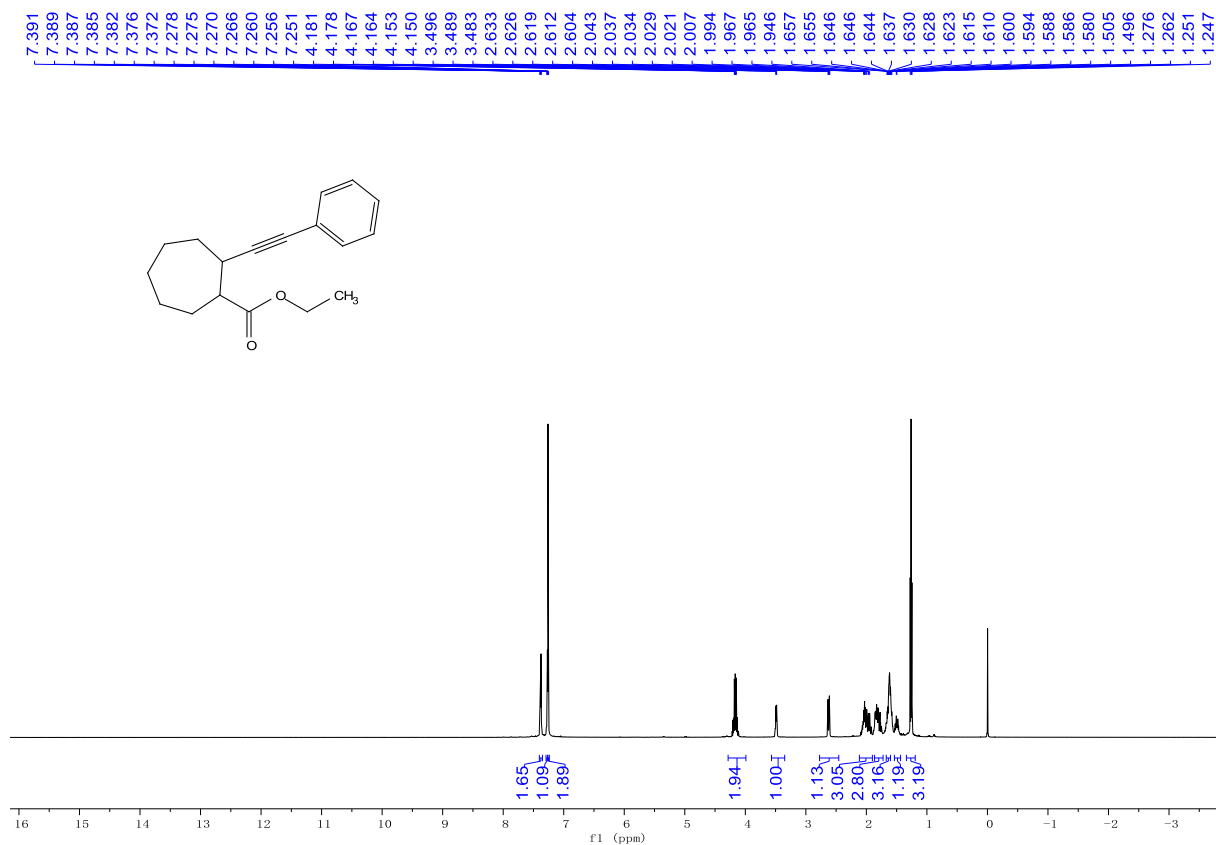

## <sup>13</sup>C NMR (125 MHz, CDCl<sub>3</sub>) spectrum of compound 6a

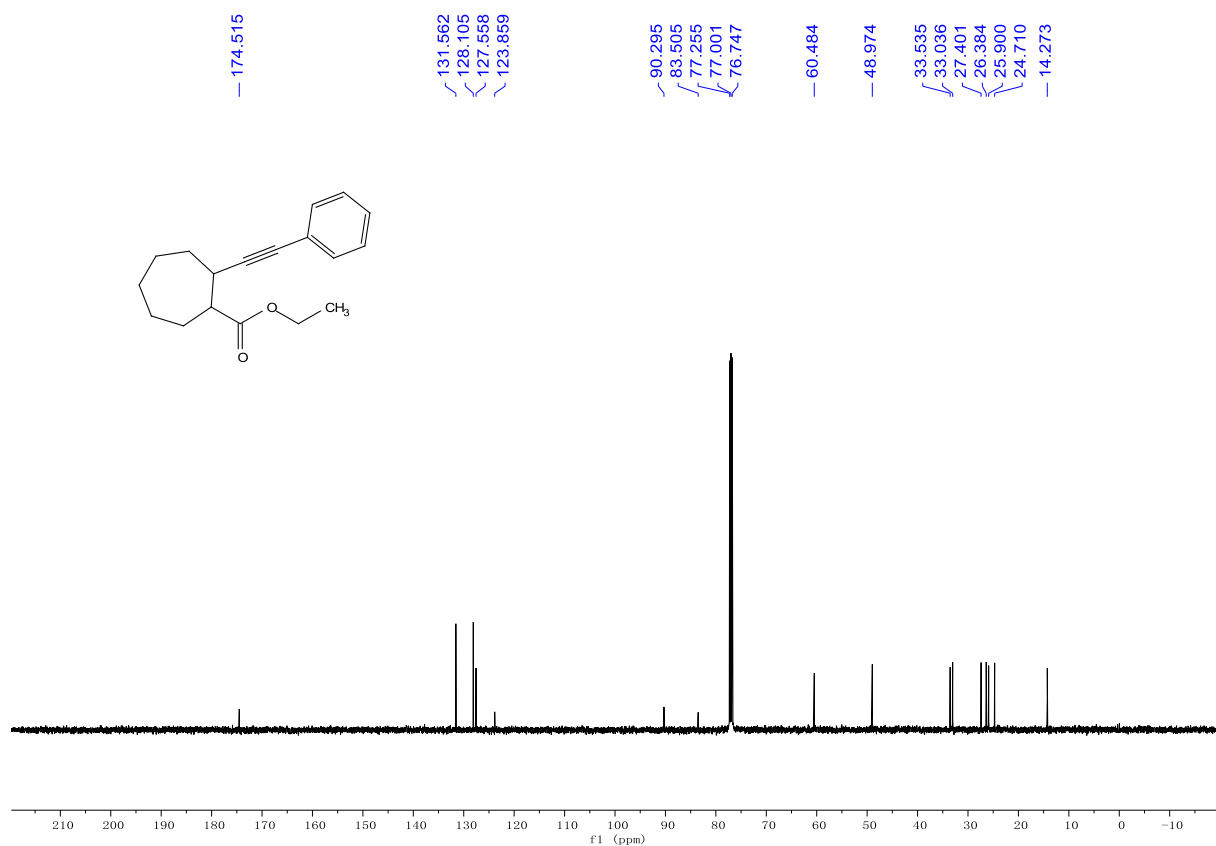

# SUPPORTING INFORMATION

## <sup>1</sup>H NMR (500 MHz, CDCl<sub>3</sub>) spectrum of compound 6b

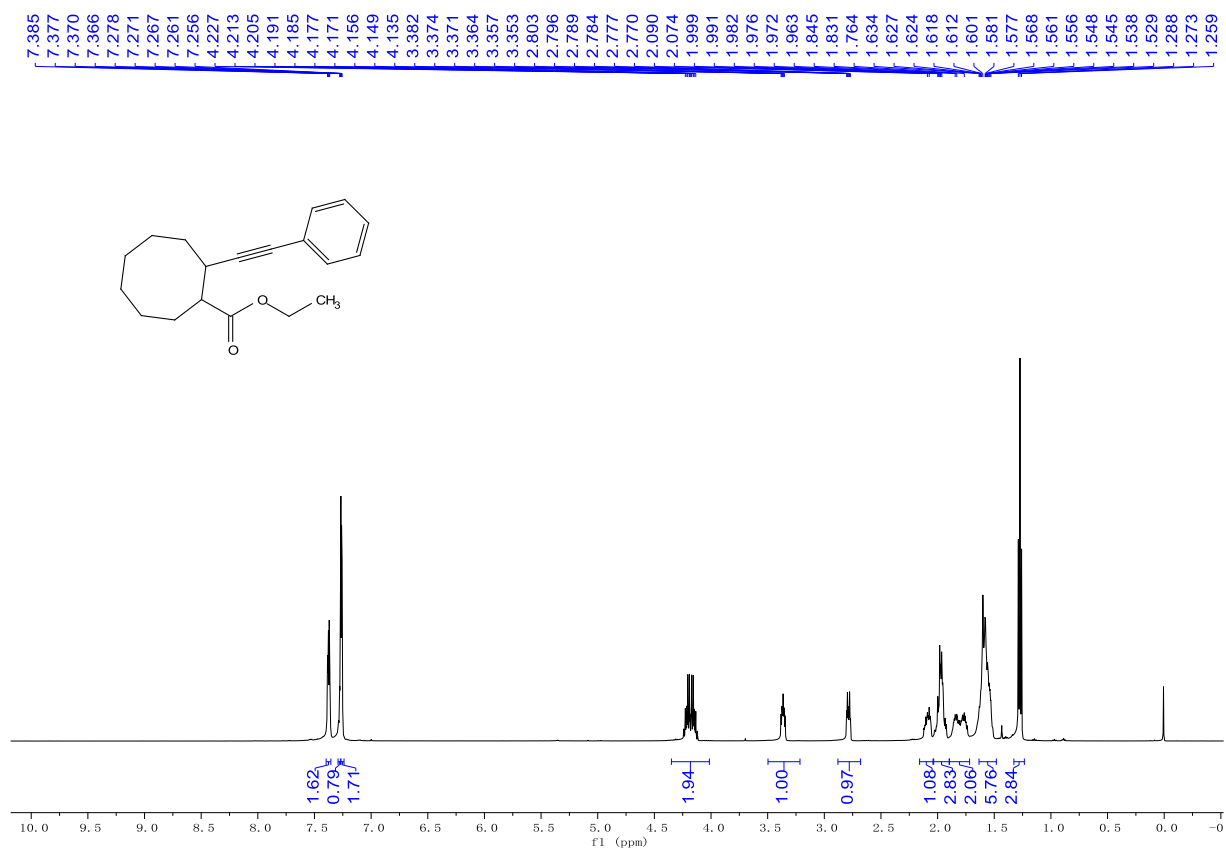

## <sup>13</sup>C NMR (125 MHz, CDCl<sub>3</sub>) spectrum of compound 6b

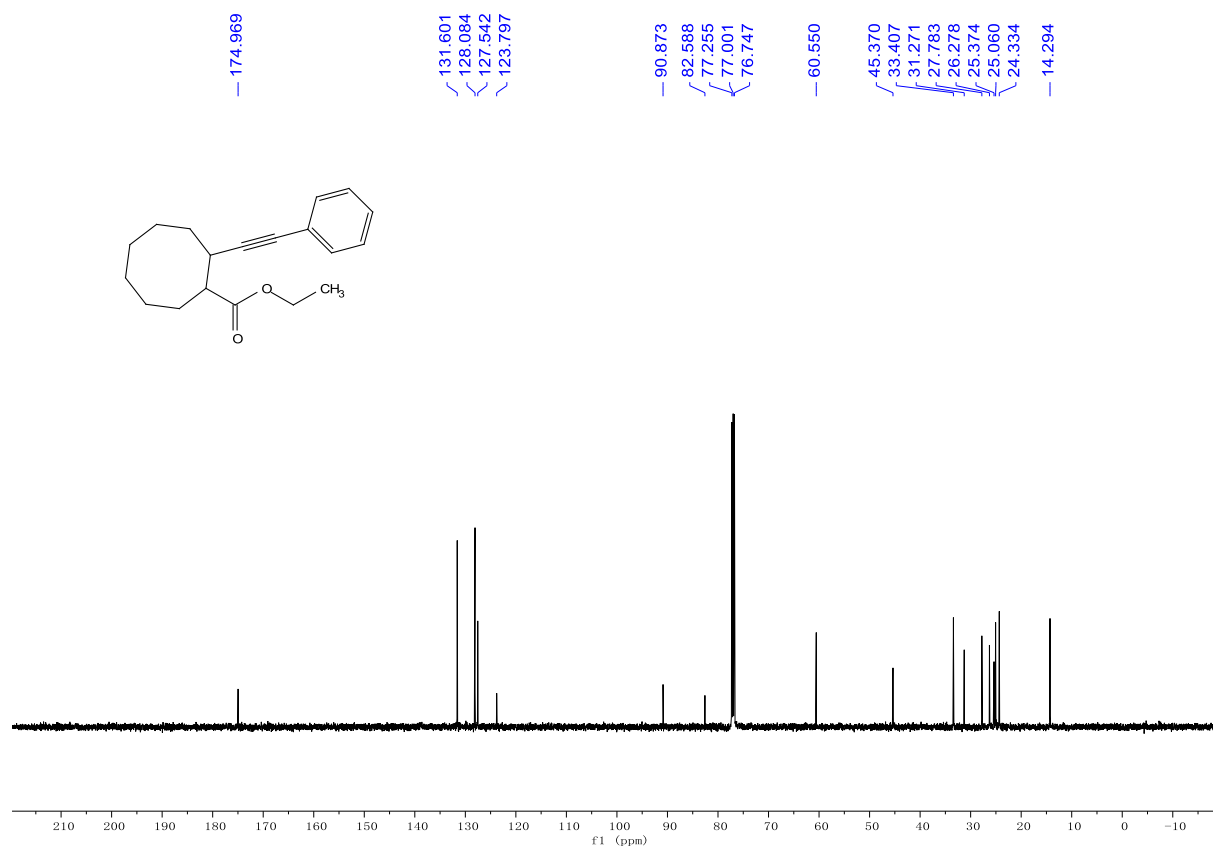

# SUPPORTING INFORMATION

## <sup>1</sup>H NMR (500 MHz, CDCl<sub>3</sub>) spectrum of compound 6c

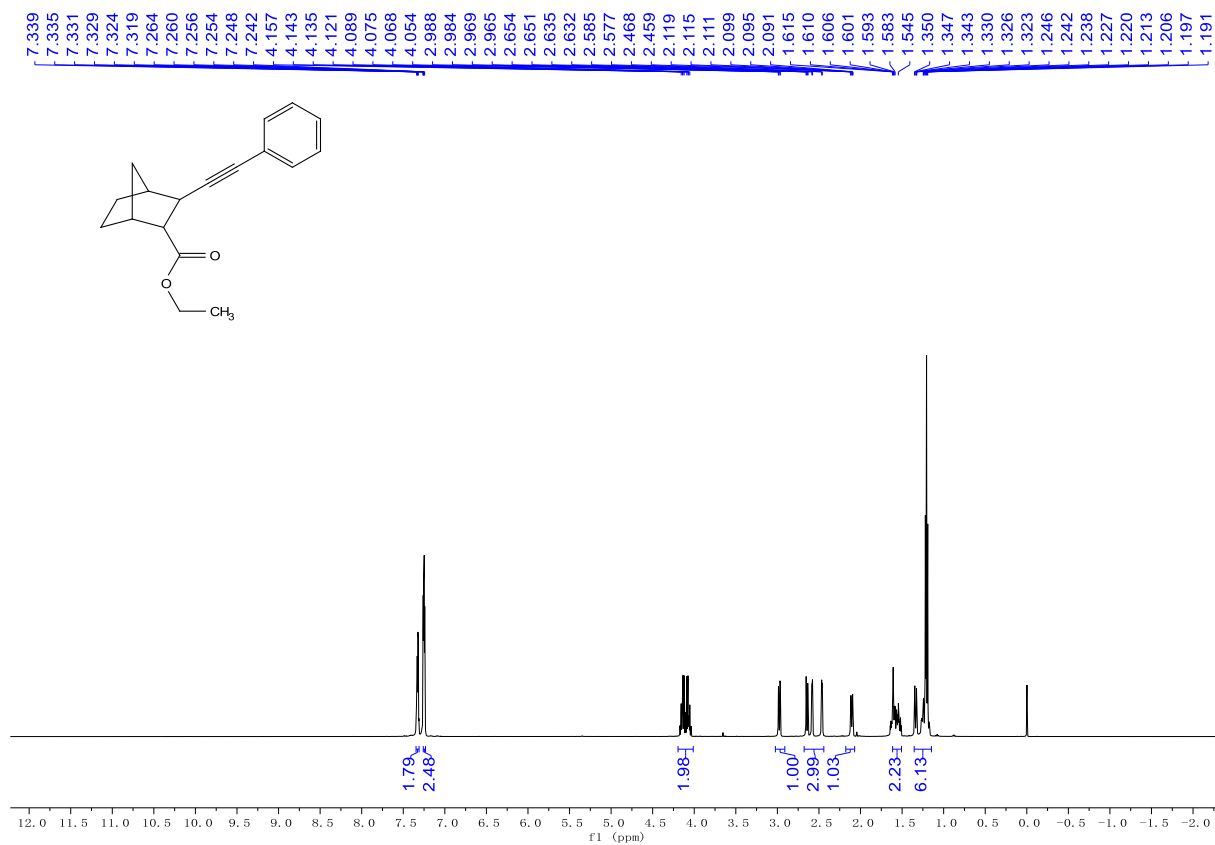

## <sup>13</sup>C NMR (125 MHz, CDCl<sub>3</sub>) spectrum of compound 6c

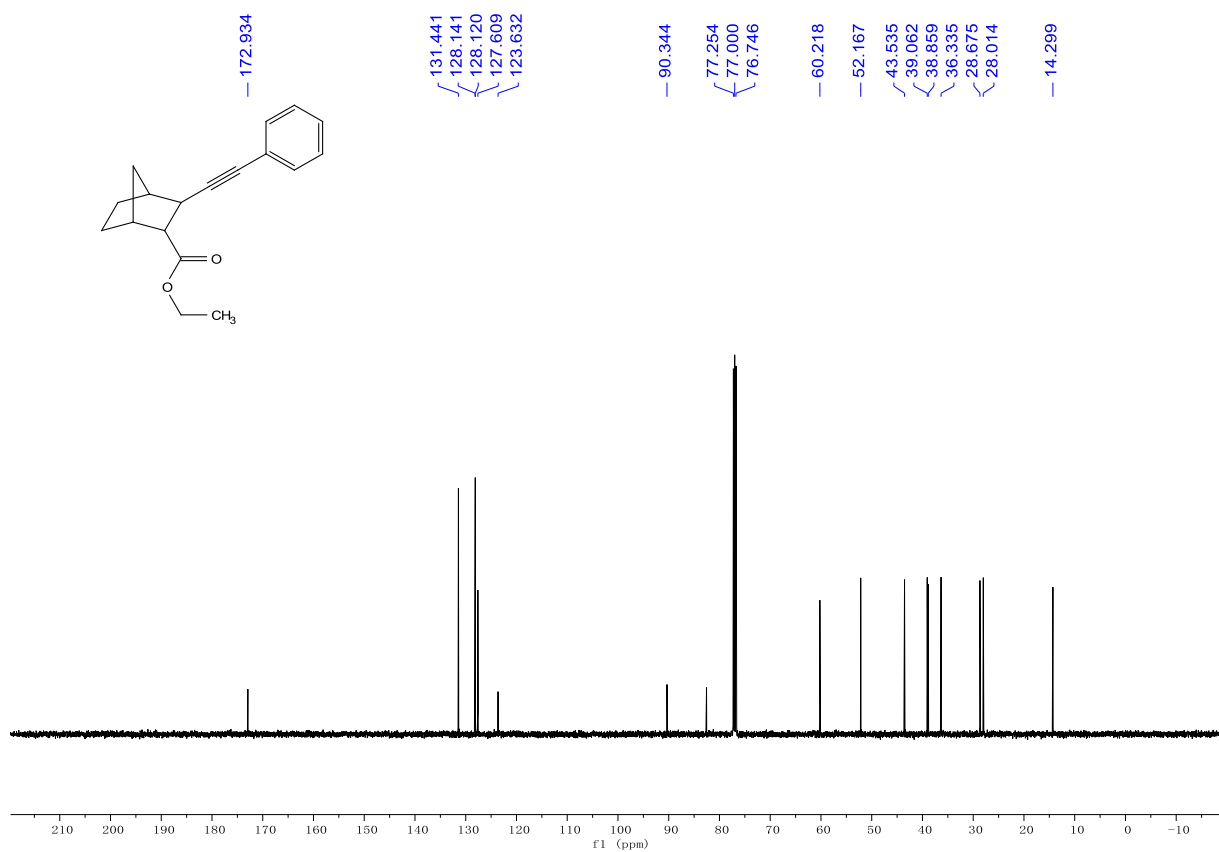

# SUPPORTING INFORMATION

## <sup>1</sup>H NMR (500 MHz, CDCl<sub>3</sub>) spectrum of compound 6d

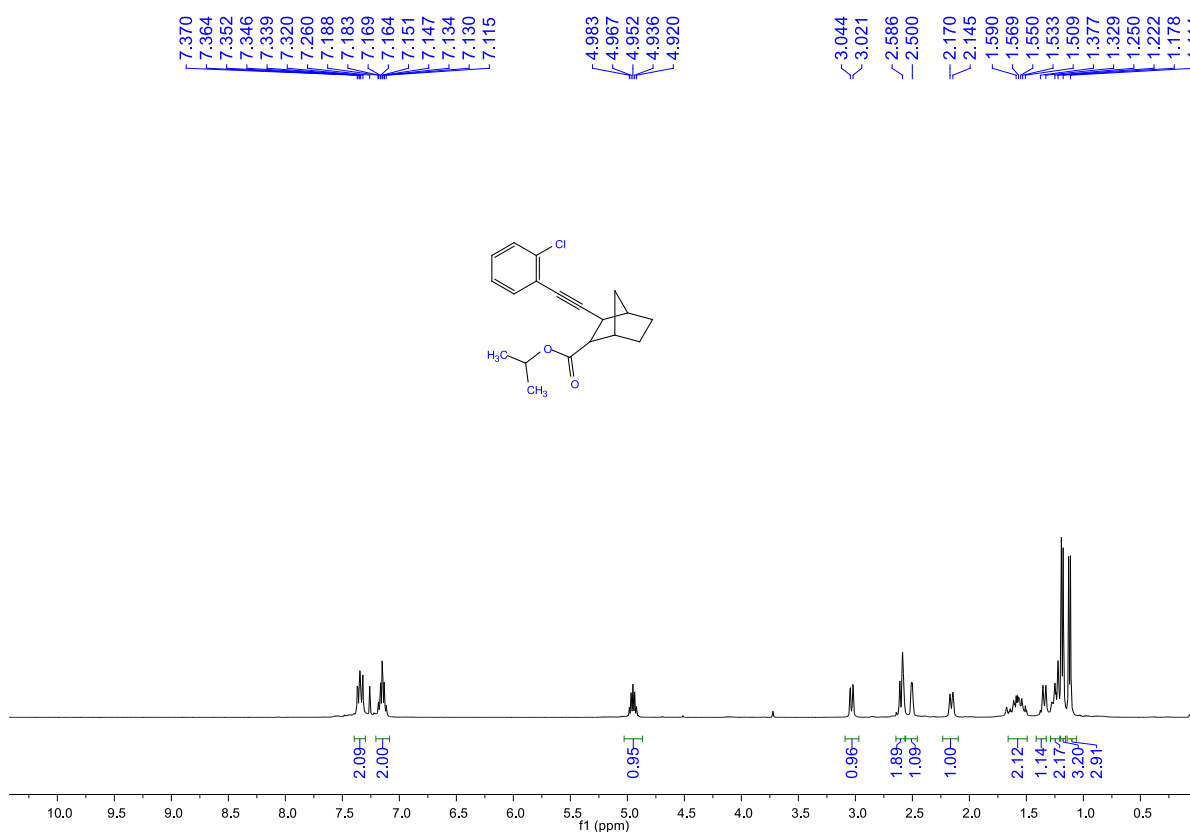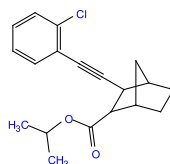

## <sup>13</sup>C NMR (125 MHz, CDCl<sub>3</sub>) spectrum of compound 6d

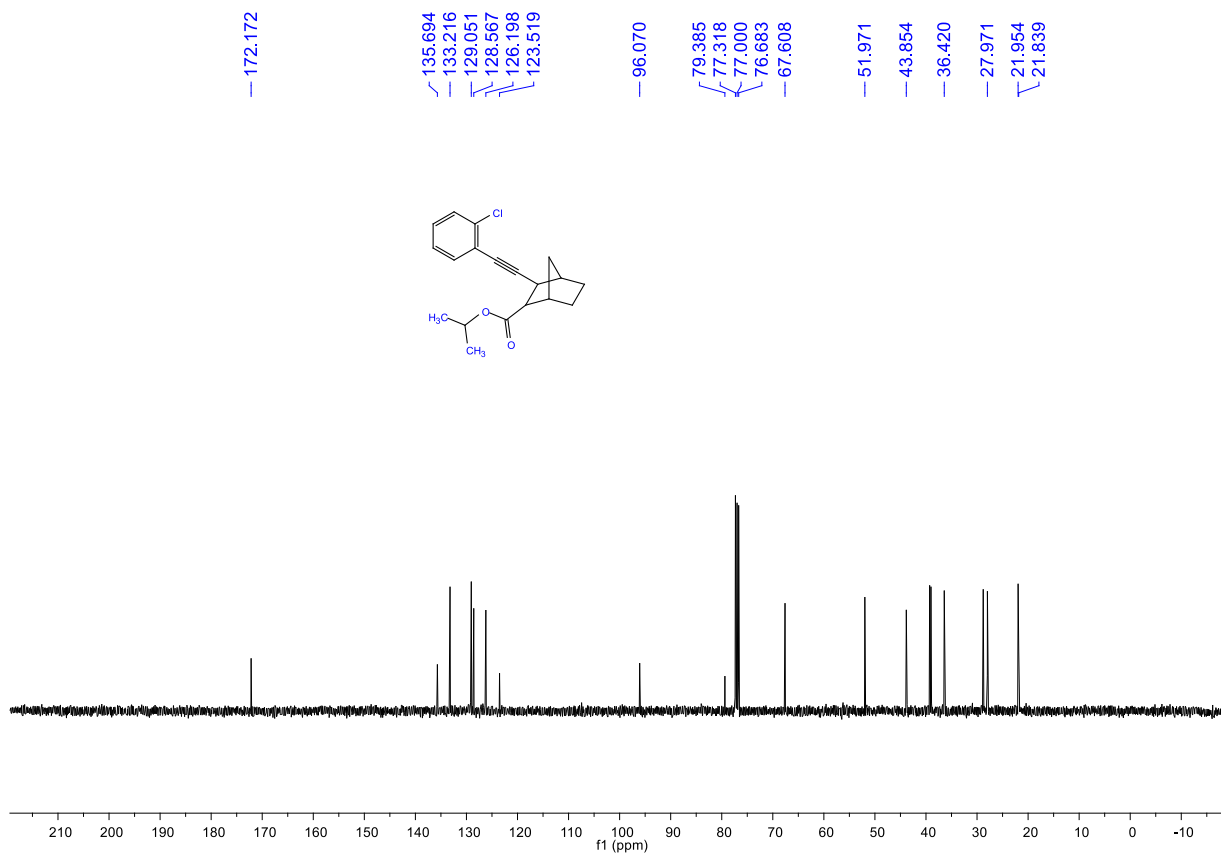

# SUPPORTING INFORMATION

## <sup>1</sup>H NMR (500 MHz, CDCl<sub>3</sub>) spectrum of compound 6e

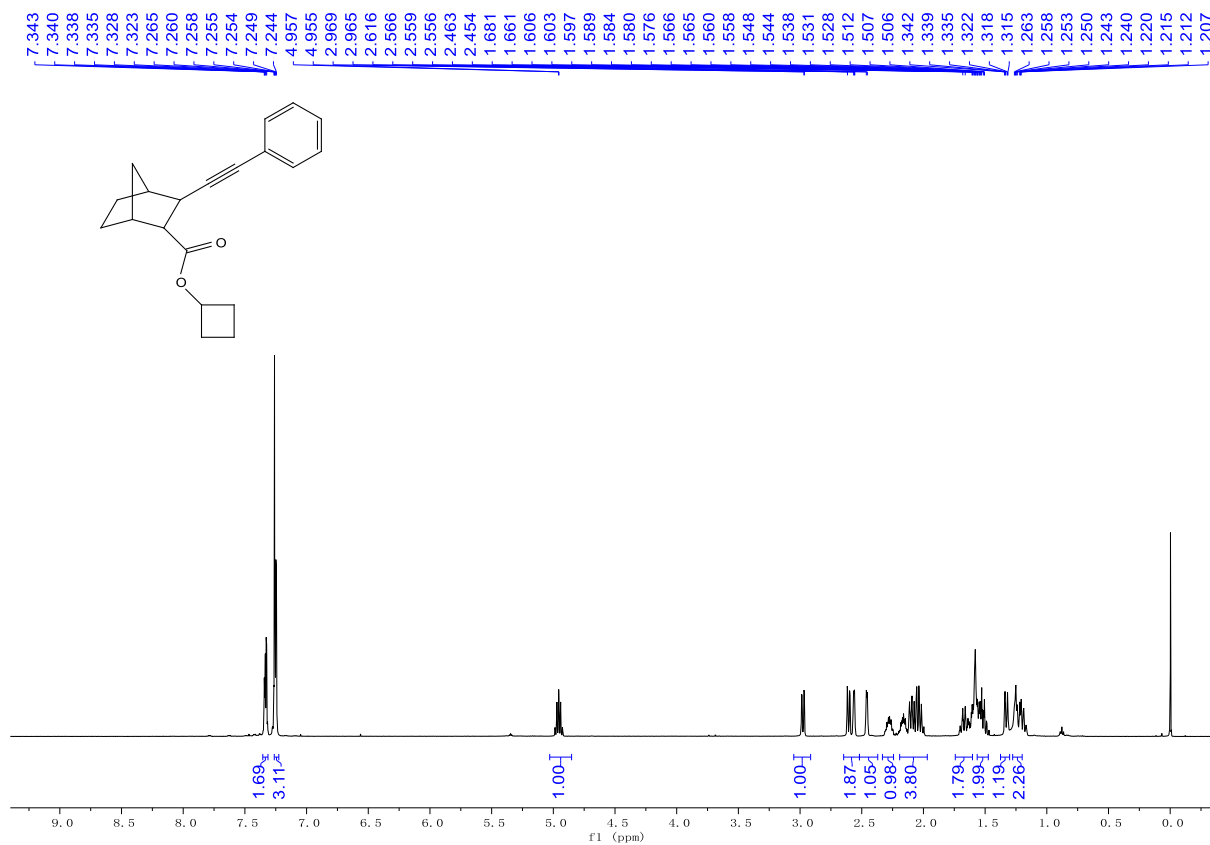

## <sup>13</sup>C NMR (125 MHz, CDCl<sub>3</sub>) spectrum of compound 6e

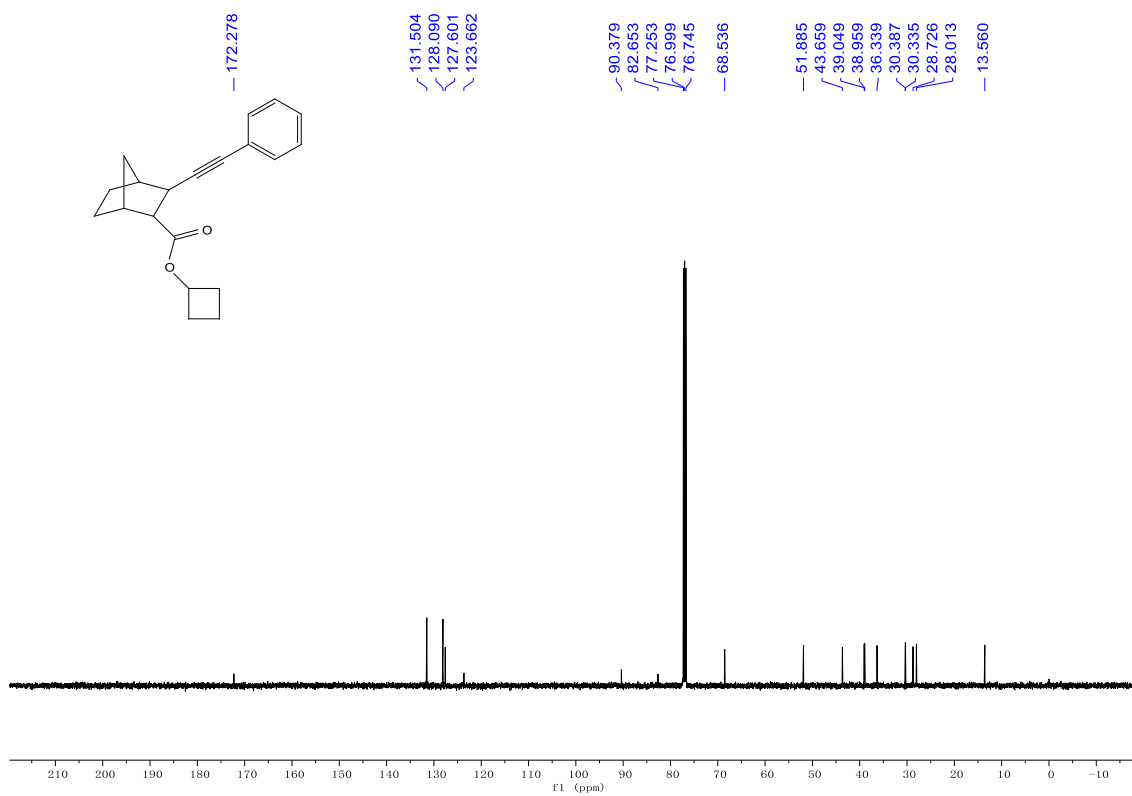

# SUPPORTING INFORMATION

## <sup>1</sup>H NMR (500 MHz, CDCl<sub>3</sub>) spectrum of compound 6f

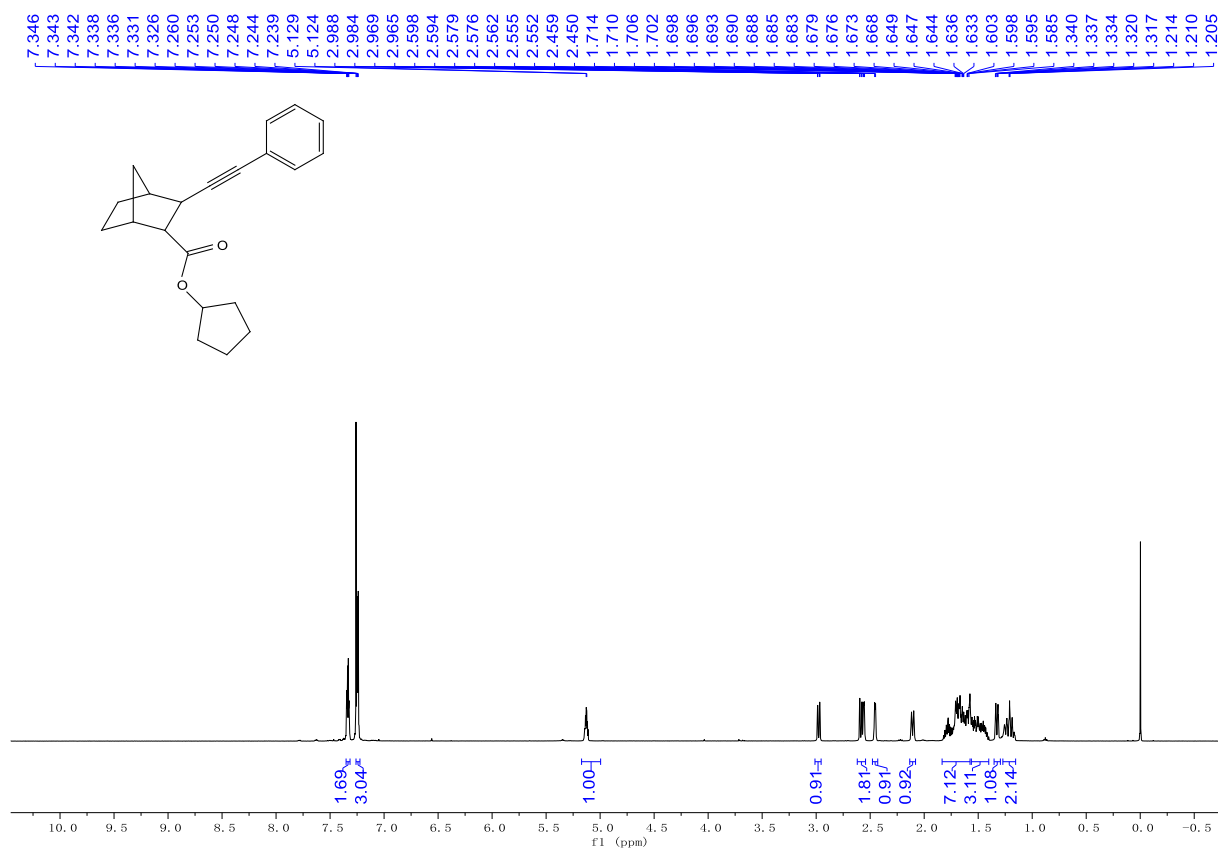

## <sup>13</sup>C NMR (125 MHz, CDCl<sub>3</sub>) spectrum of compound 6f

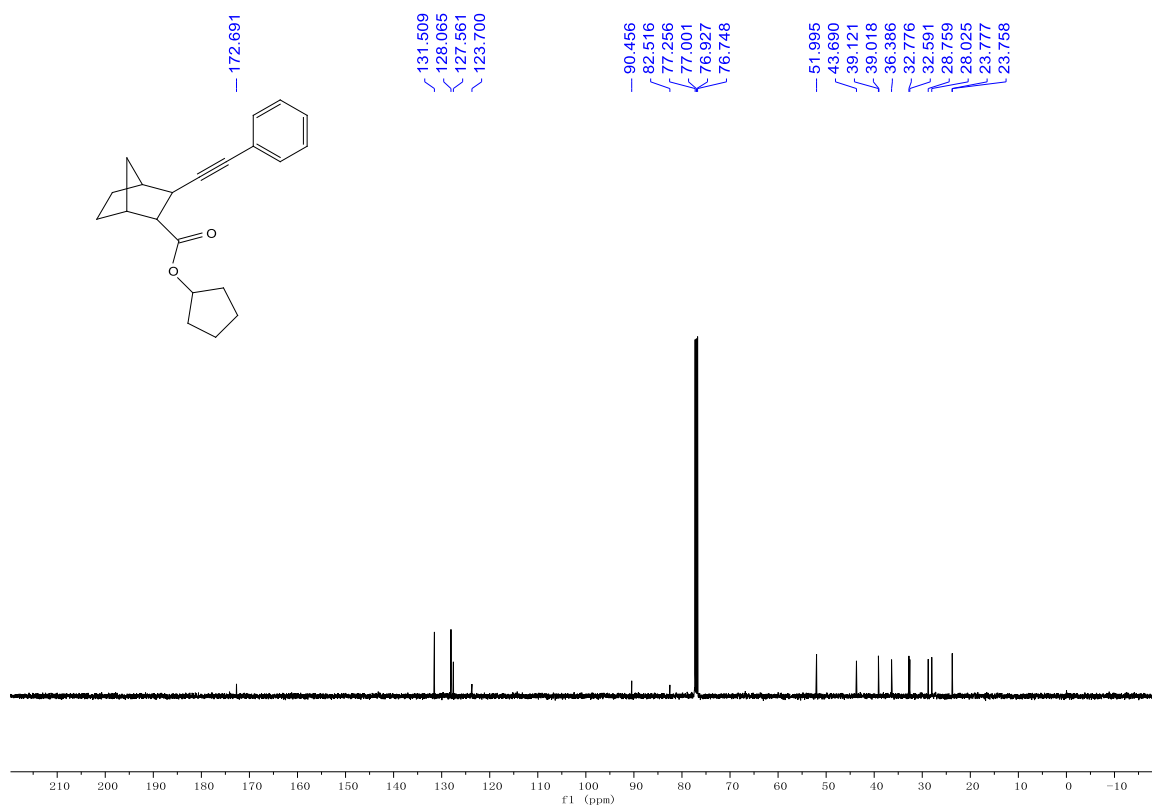

# SUPPORTING INFORMATION

## <sup>1</sup>H NMR (500 MHz, CDCl<sub>3</sub>) spectrum of compound 6g

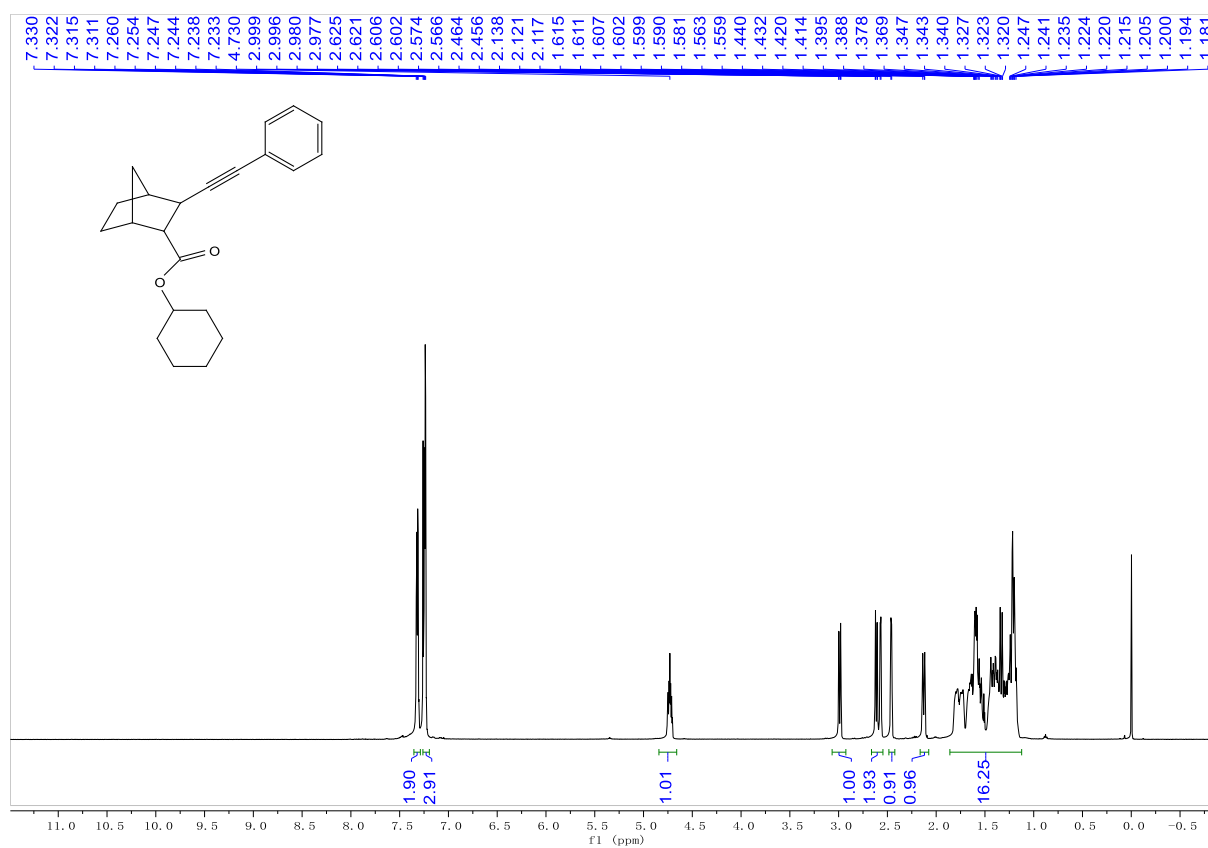

## <sup>13</sup>C NMR (125 MHz, CDCl<sub>3</sub>) spectrum of compound 6g

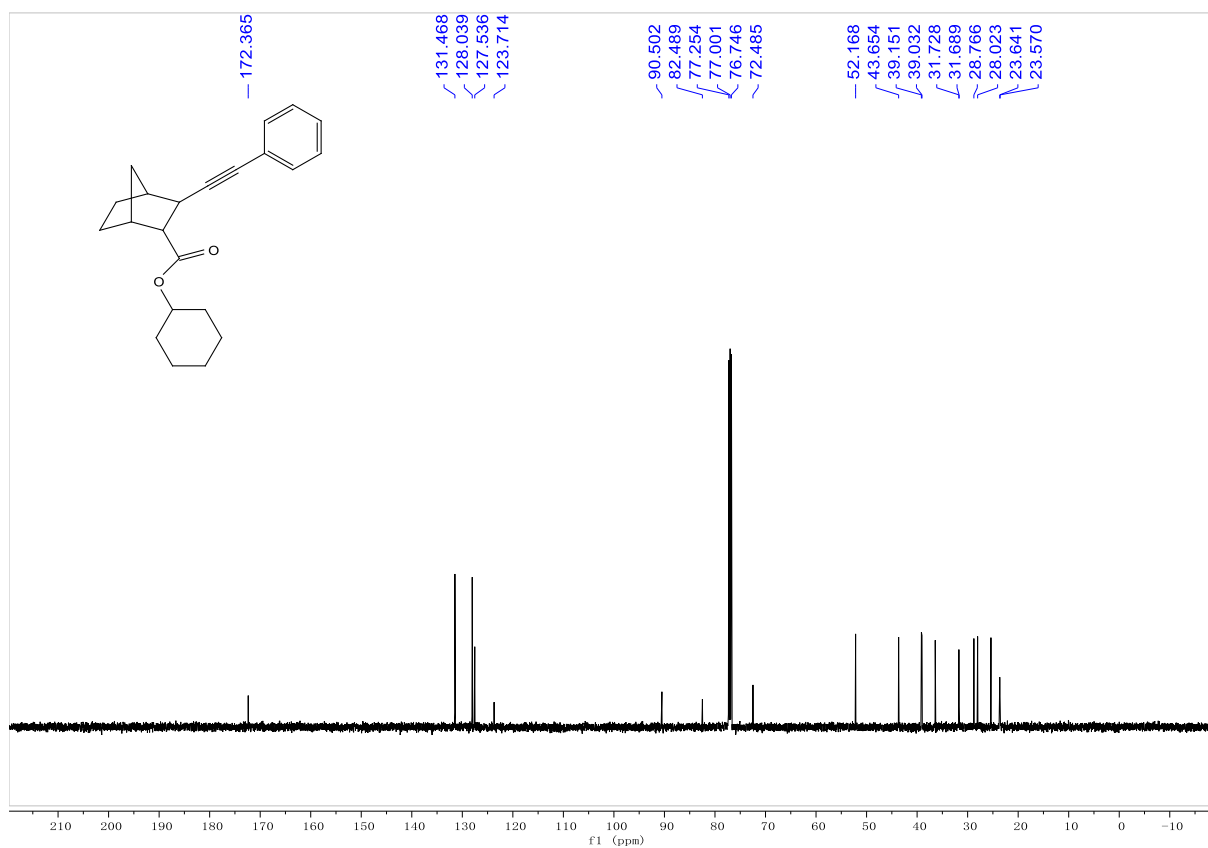



SUPPORTING INFORMATION

<sup>1</sup>H NMR (500 MHz, CDCl<sub>3</sub>) spectrum of compound 6h

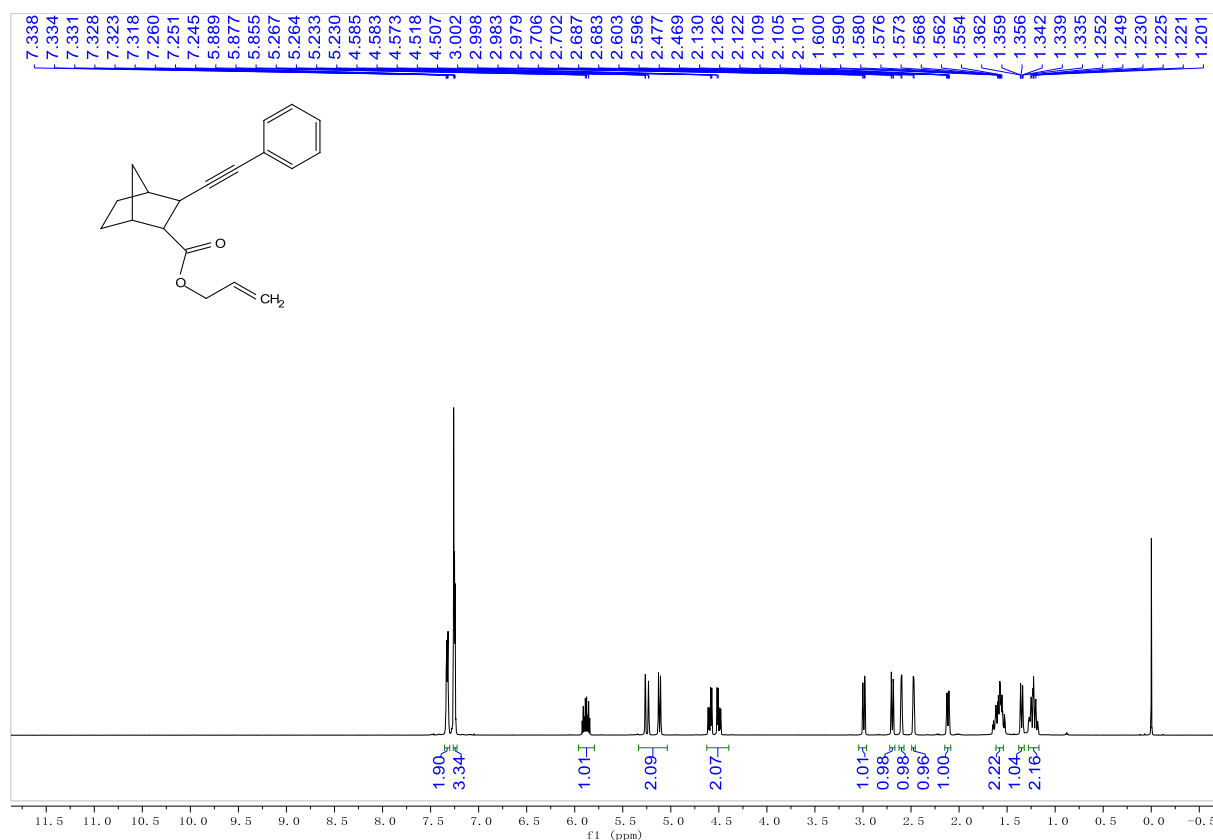

<sup>13</sup>C NMR (125 MHz, CDCl<sub>3</sub>) spectrum of compound 6h

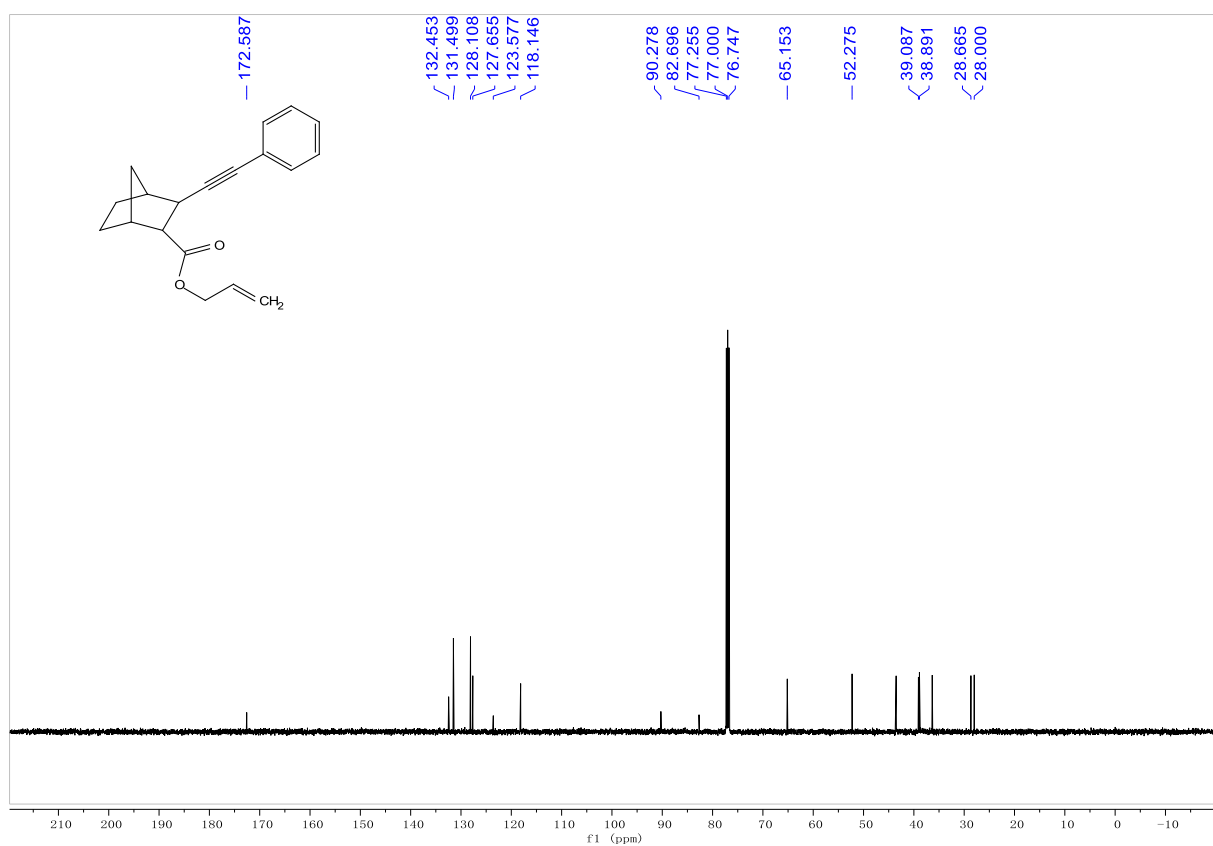

# SUPPORTING INFORMATION

## $^1\text{H}$ NMR (500 MHz, $\text{CDCl}_3$ ) spectrum of compound 6i

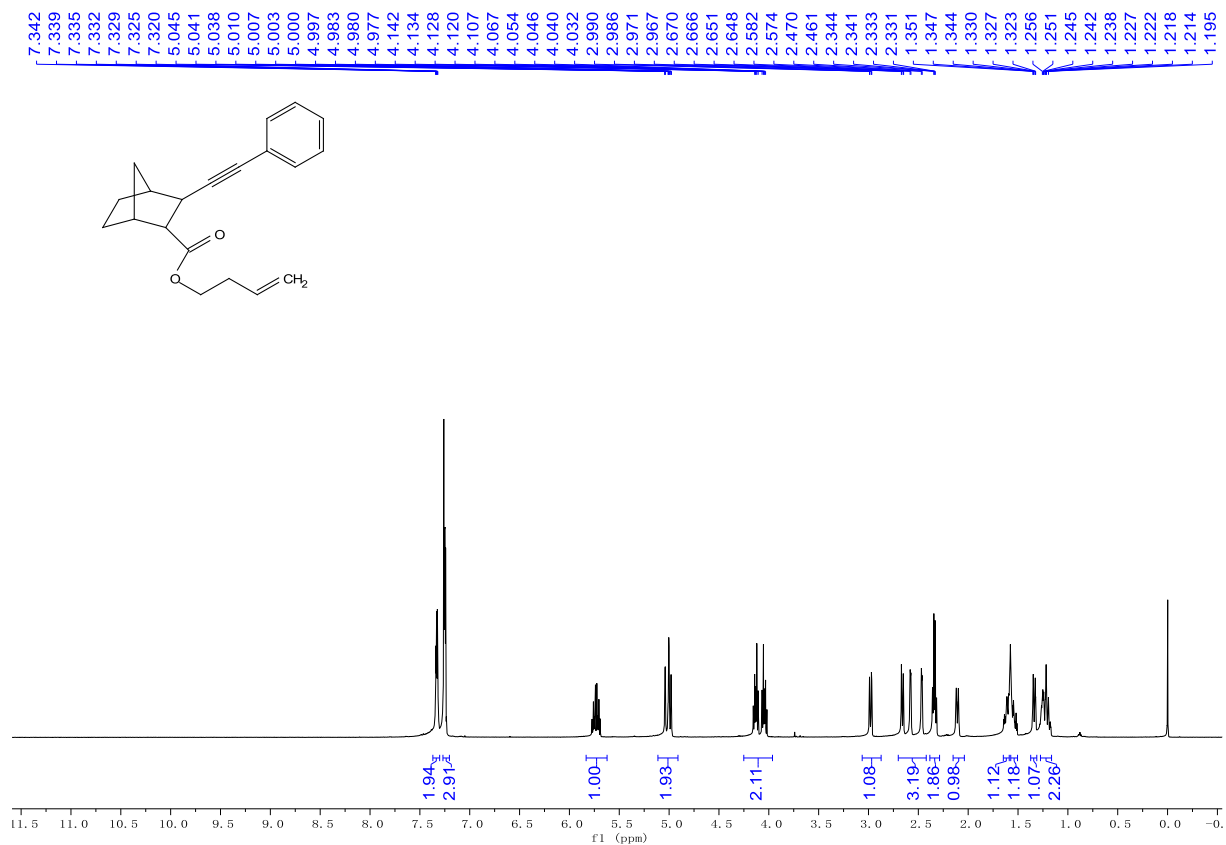

## $^{13}\text{C}$ NMR (125 MHz, $\text{CDCl}_3$ ) spectrum of compound 6i

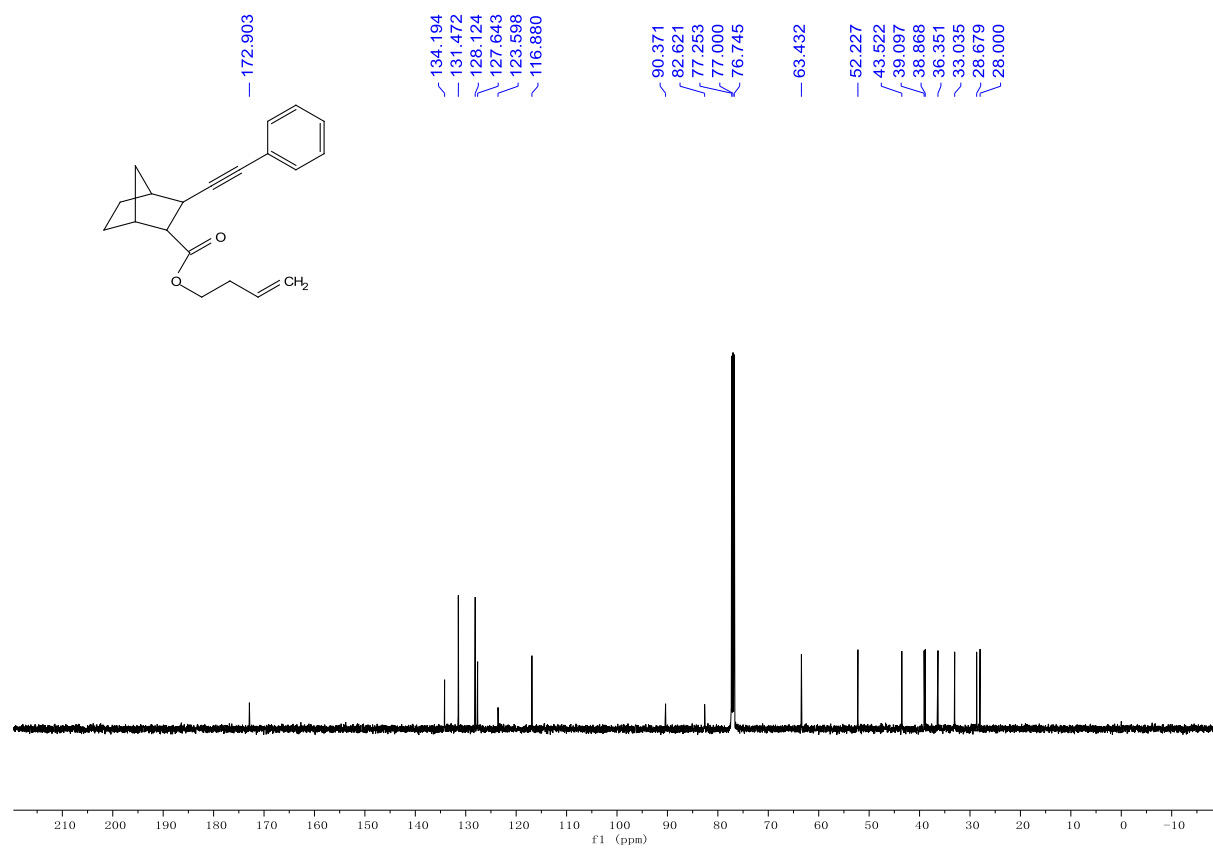

SUPPORTING INFORMATION

**<sup>1</sup>H NMR (500 MHz, CDCl<sub>3</sub>) spectrum of compound 6j**

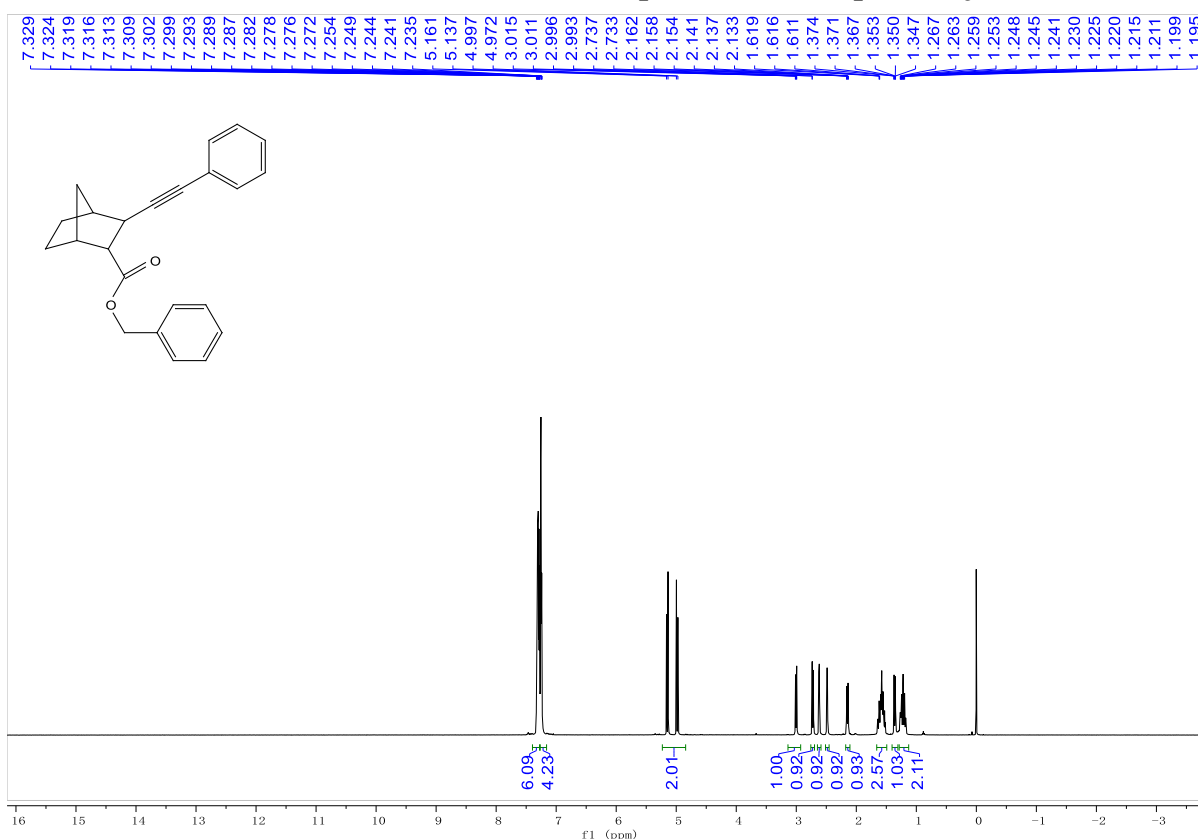

**<sup>13</sup>C NMR (125 MHz, CDCl<sub>3</sub>) spectrum of compound 6j**

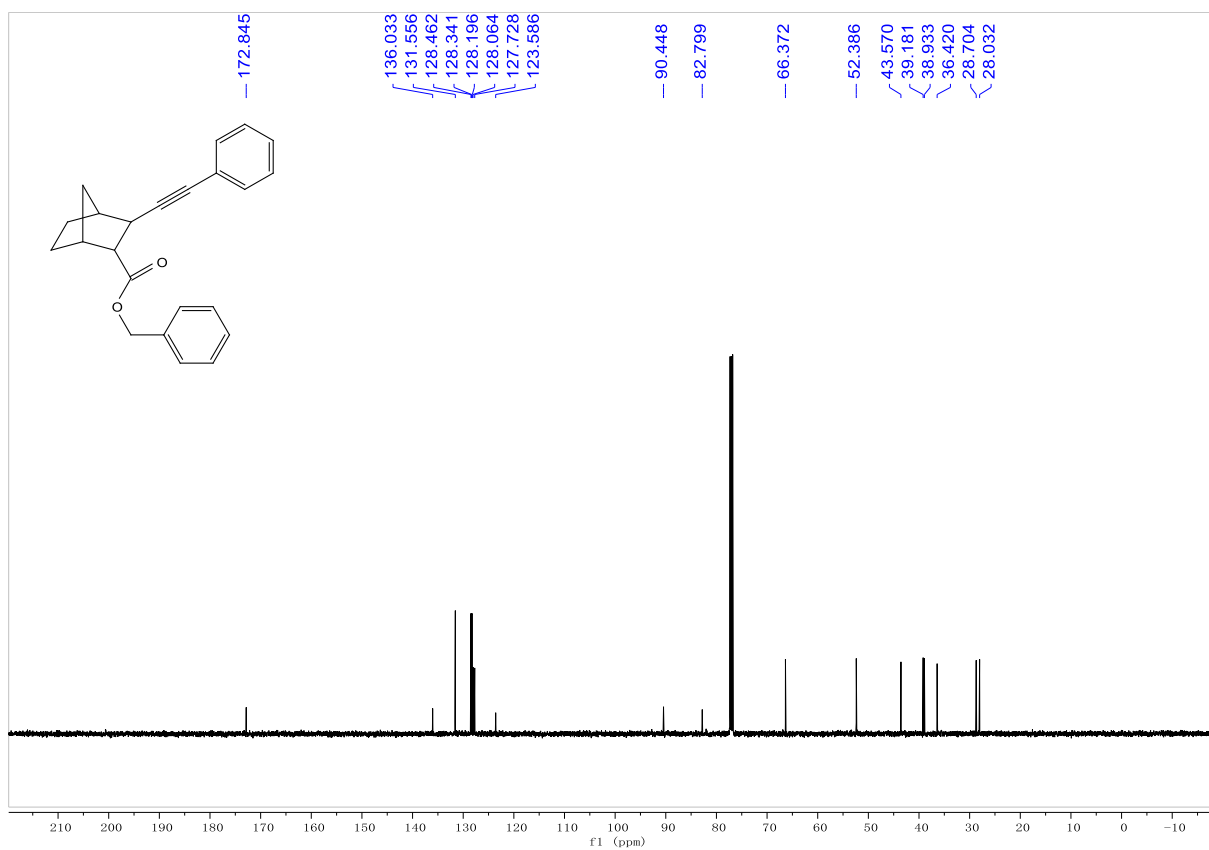

# SUPPORTING INFORMATION

## <sup>1</sup>H NMR (500 MHz, CDCl<sub>3</sub>) spectrum of compound 6k

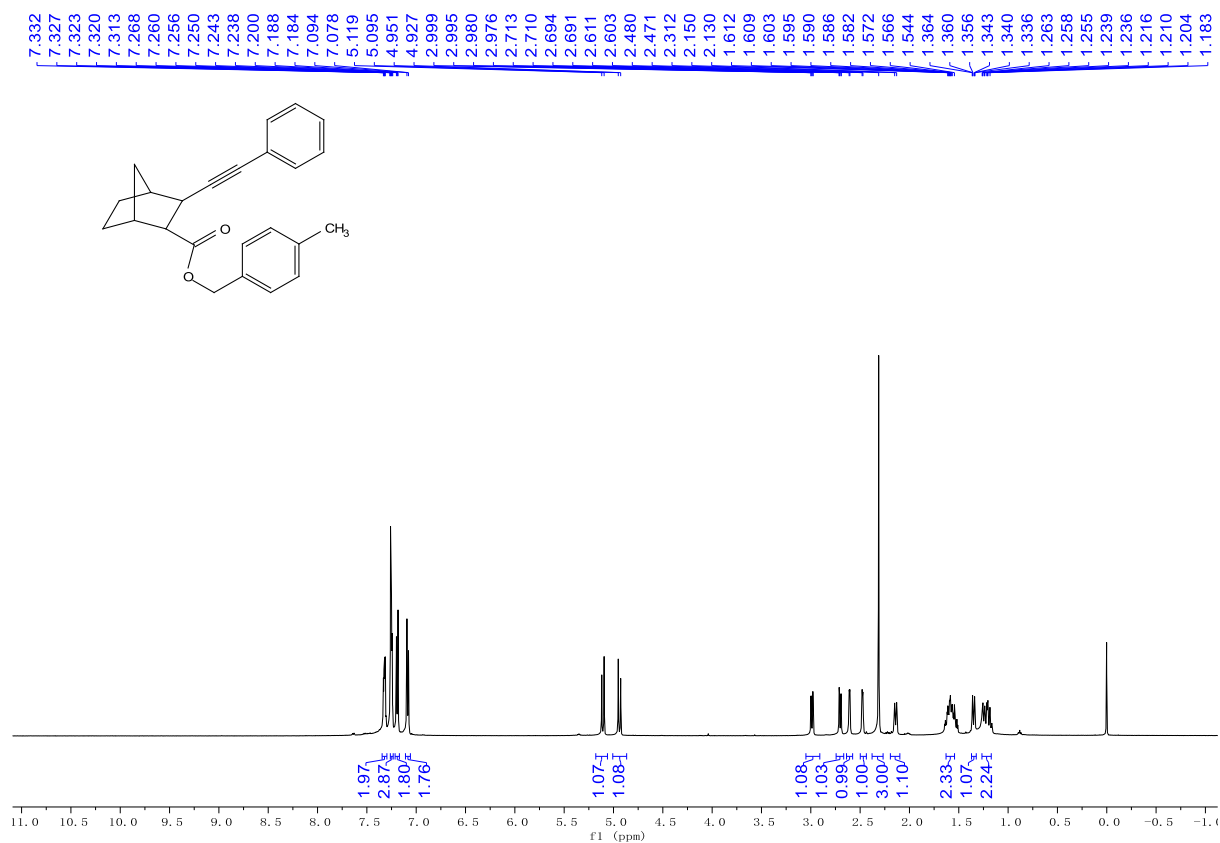

## <sup>13</sup>C NMR (125 MHz, CDCl<sub>3</sub>) spectrum of compound 6k

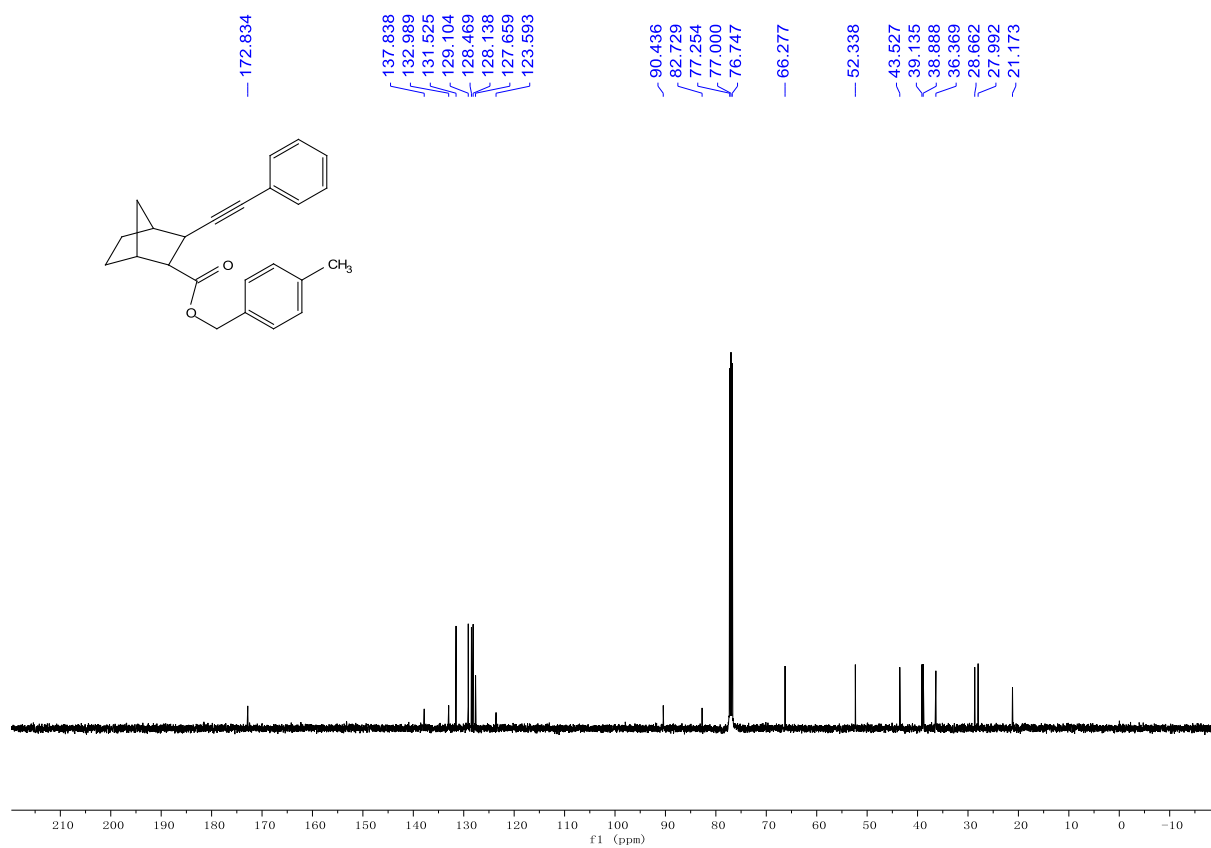

SUPPORTING INFORMATION

<sup>1</sup>H NMR (500 MHz, CDCl<sub>3</sub>) spectrum of compound 6l

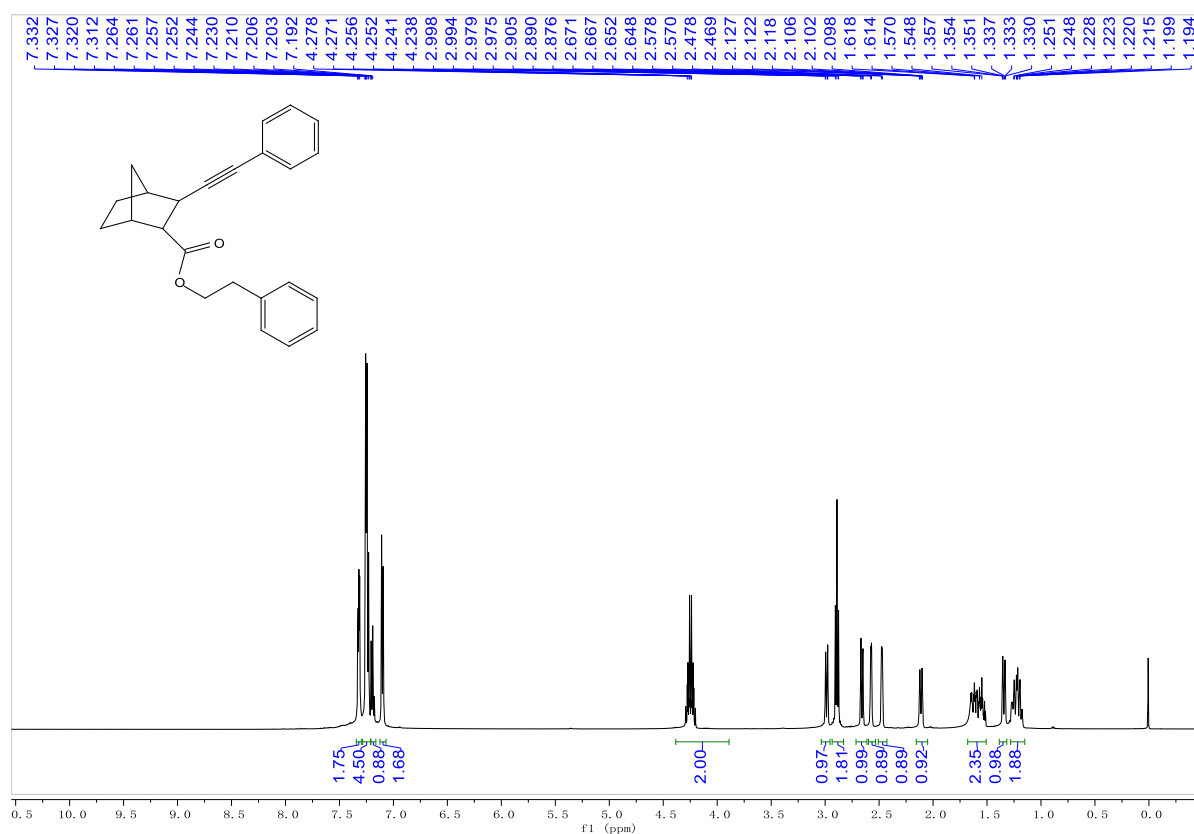

<sup>13</sup>C NMR (125 MHz, CDCl<sub>3</sub>) spectrum of compound 6l

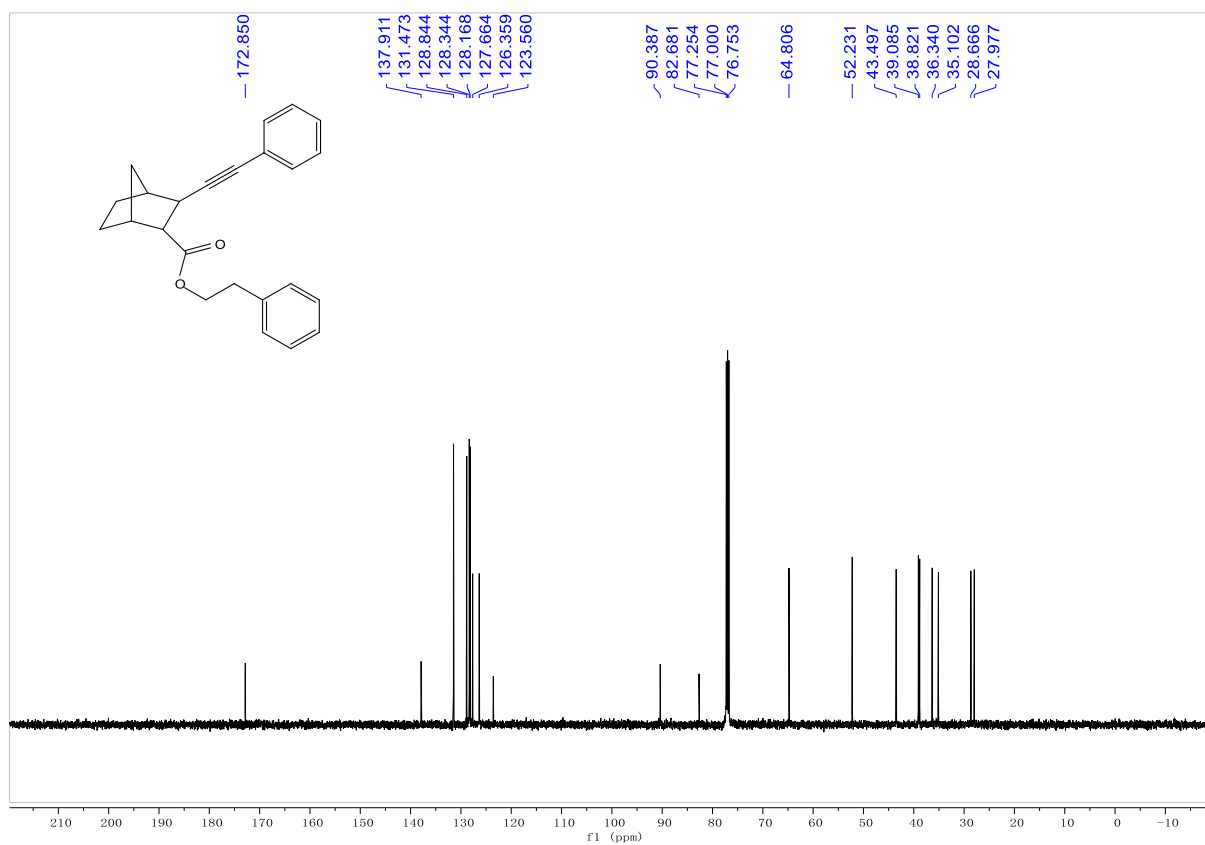

# SUPPORTING INFORMATION

## <sup>1</sup>H NMR (500 MHz, CDCl<sub>3</sub>) spectrum of compound 6m

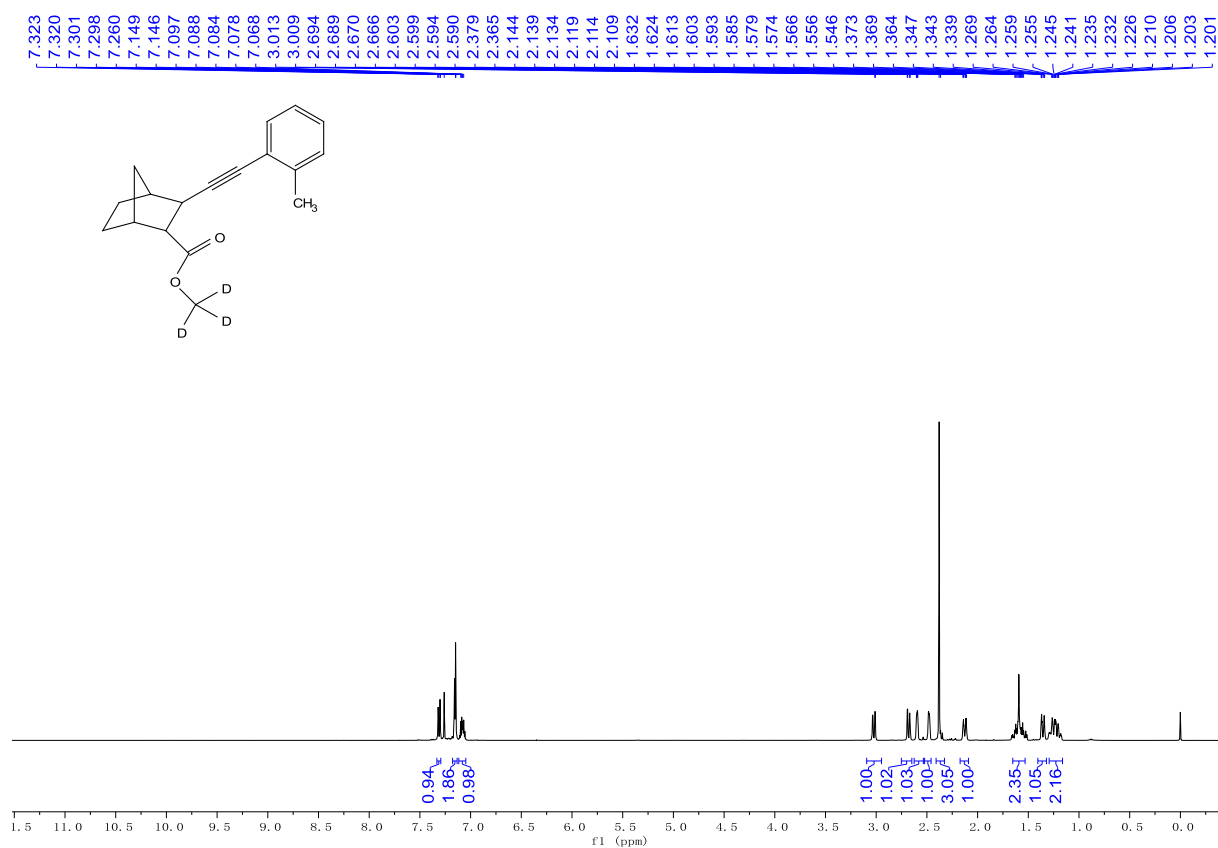

## <sup>13</sup>C NMR (125 MHz, CDCl<sub>3</sub>) spectrum of compound 6m

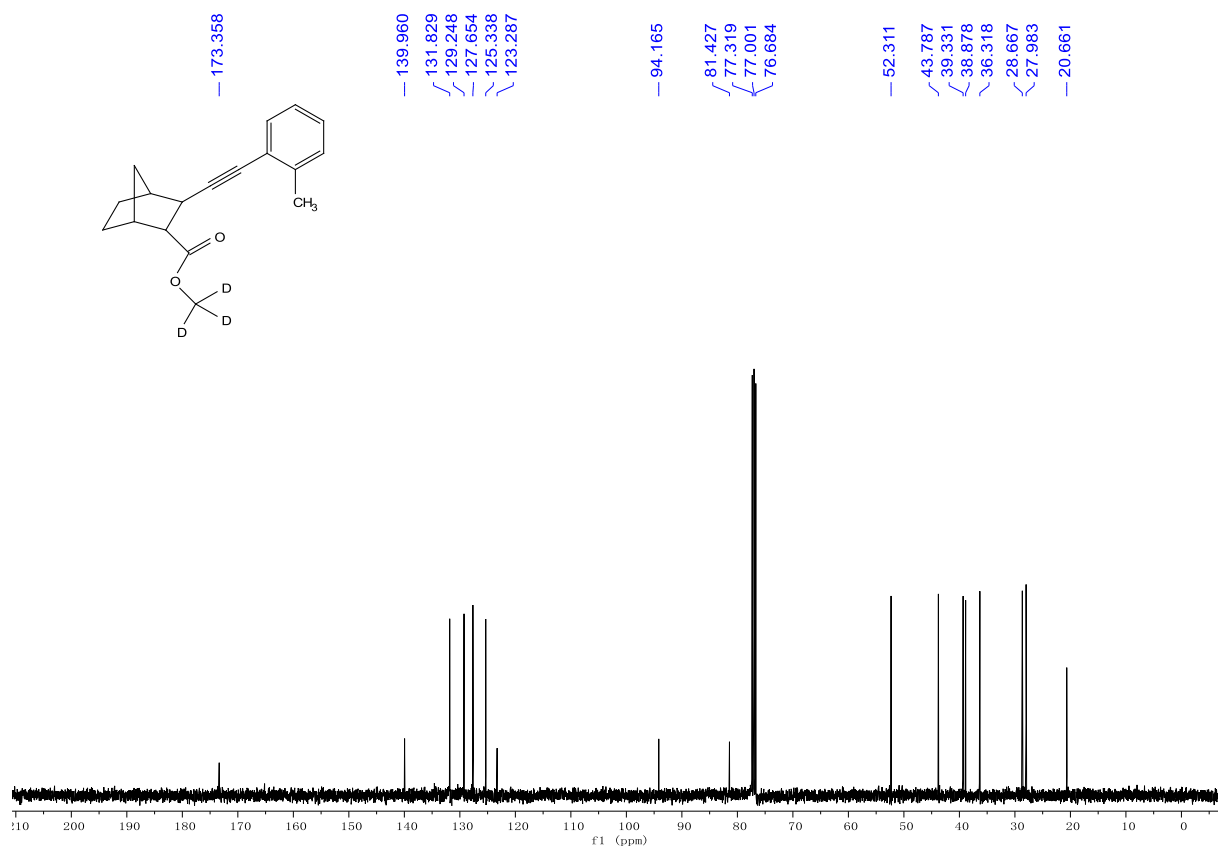

# SUPPORTING INFORMATION

## <sup>1</sup>H NMR (400 MHz, CDCl<sub>3</sub>) spectrum of compound 7a

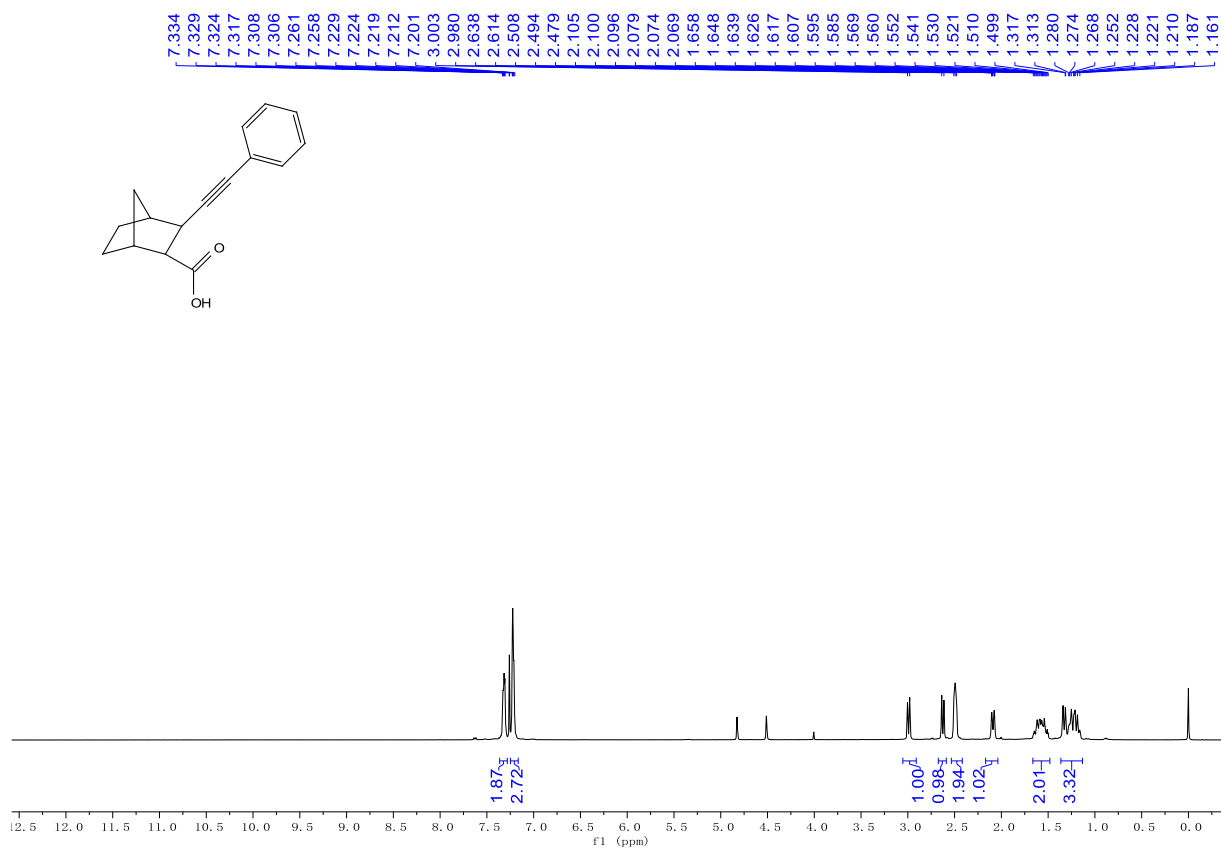

## <sup>13</sup>C NMR (100 MHz, CDCl<sub>3</sub>) spectrum of compound 7a

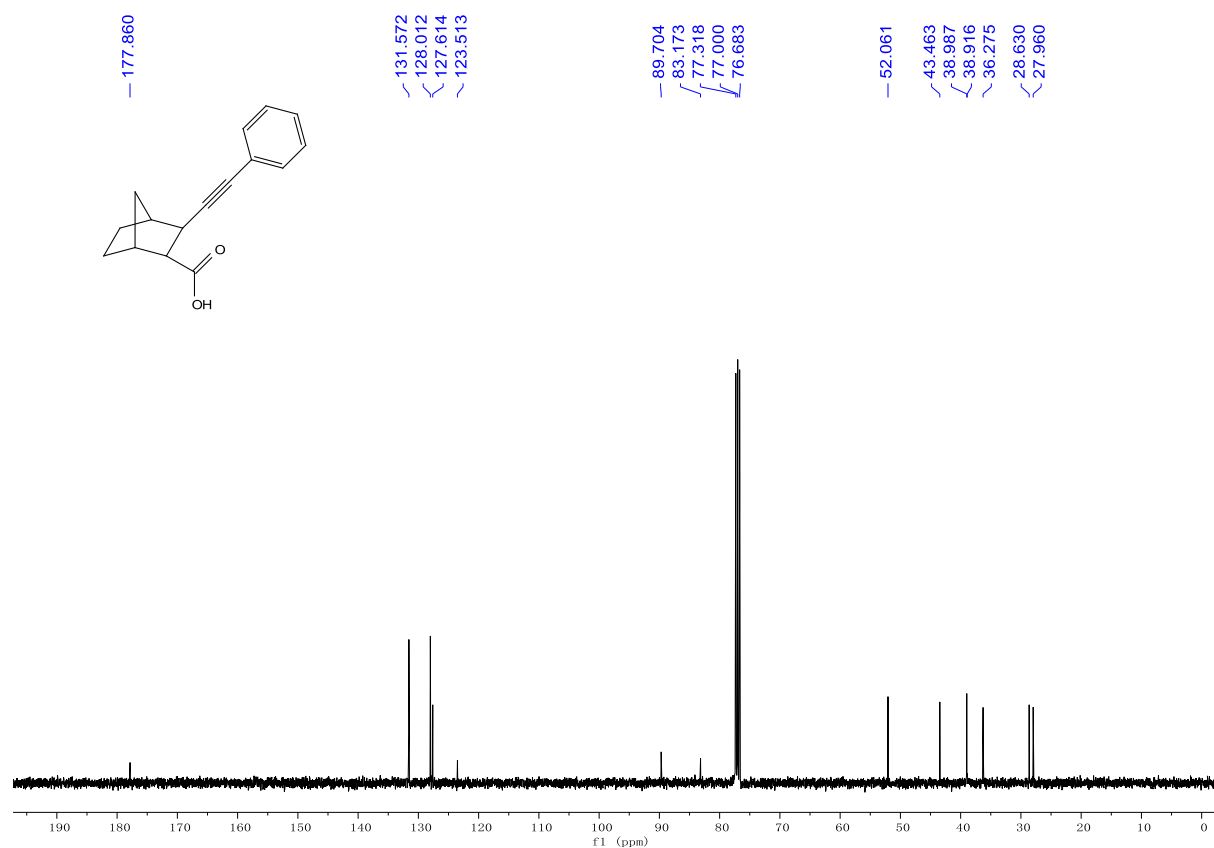

# SUPPORTING INFORMATION

## <sup>1</sup>H NMR (400 MHz, CDCl<sub>3</sub>) spectrum of compound 7b

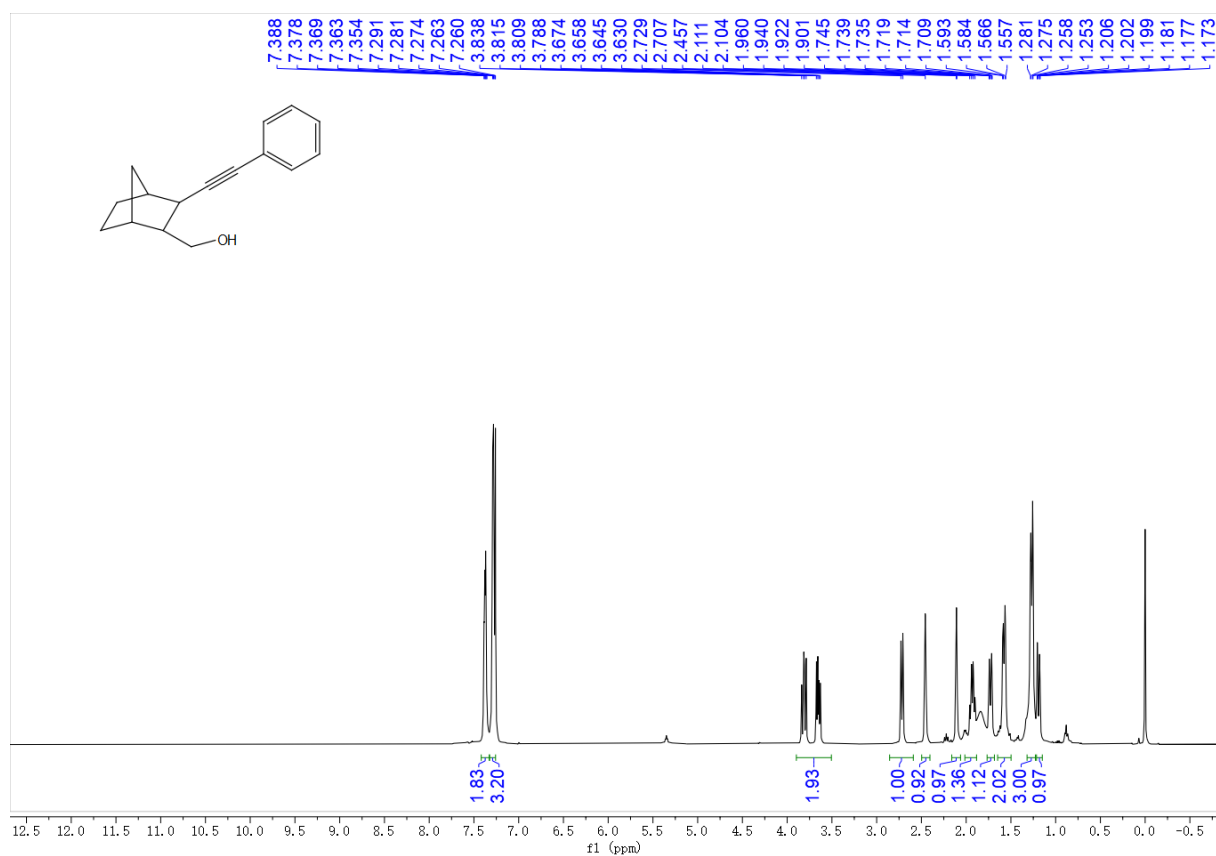

## <sup>13</sup>C NMR (100 MHz, CDCl<sub>3</sub>) spectrum of compound 7d

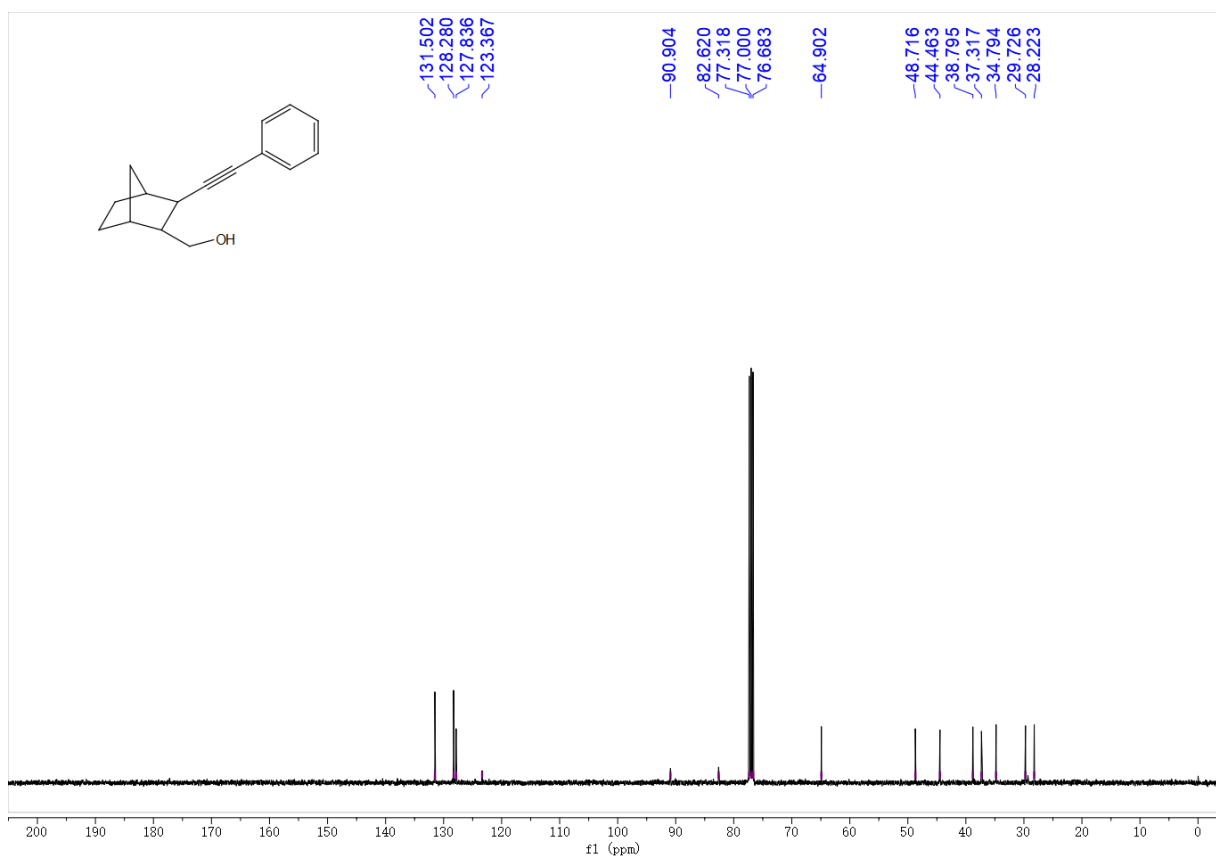



# SUPPORTING INFORMATION

## <sup>1</sup>H NMR (400 MHz, CDCl<sub>3</sub>) spectrum of compound 7c

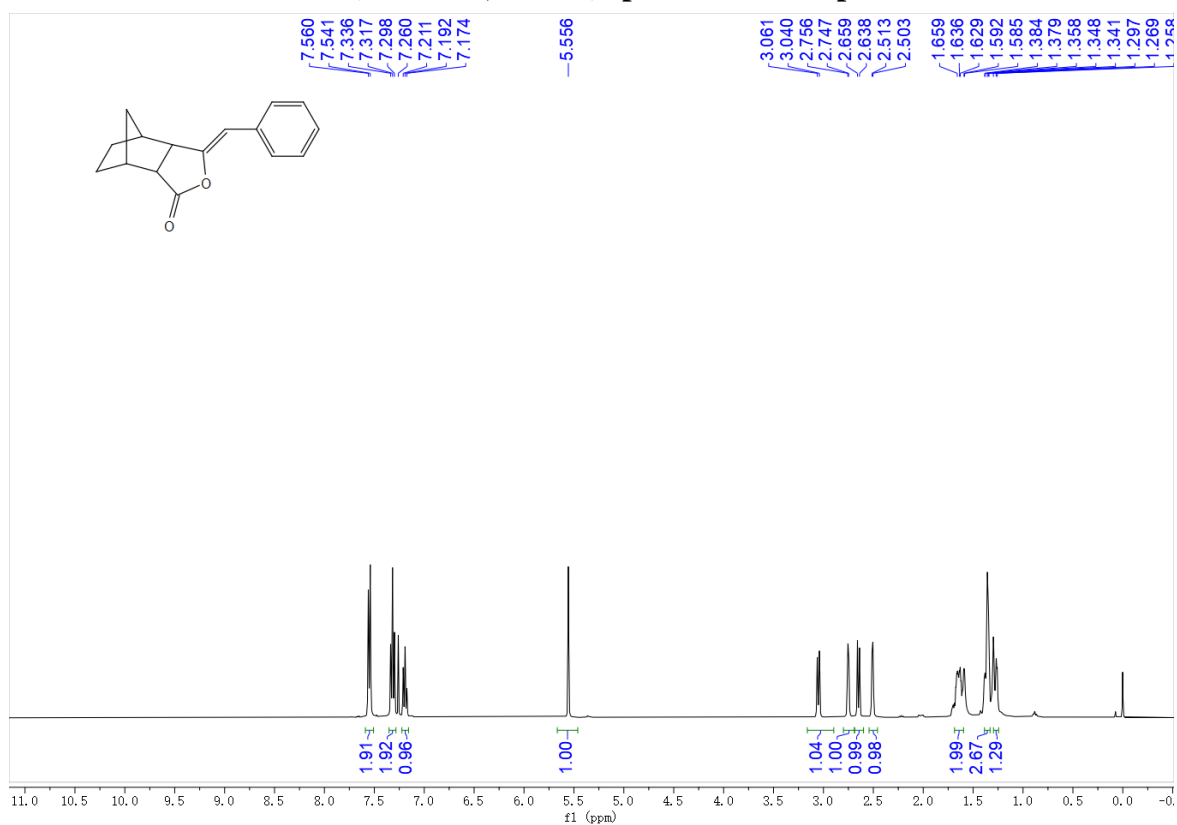

## <sup>13</sup>C NMR (100 MHz, CDCl<sub>3</sub>) spectrum of compound 7c

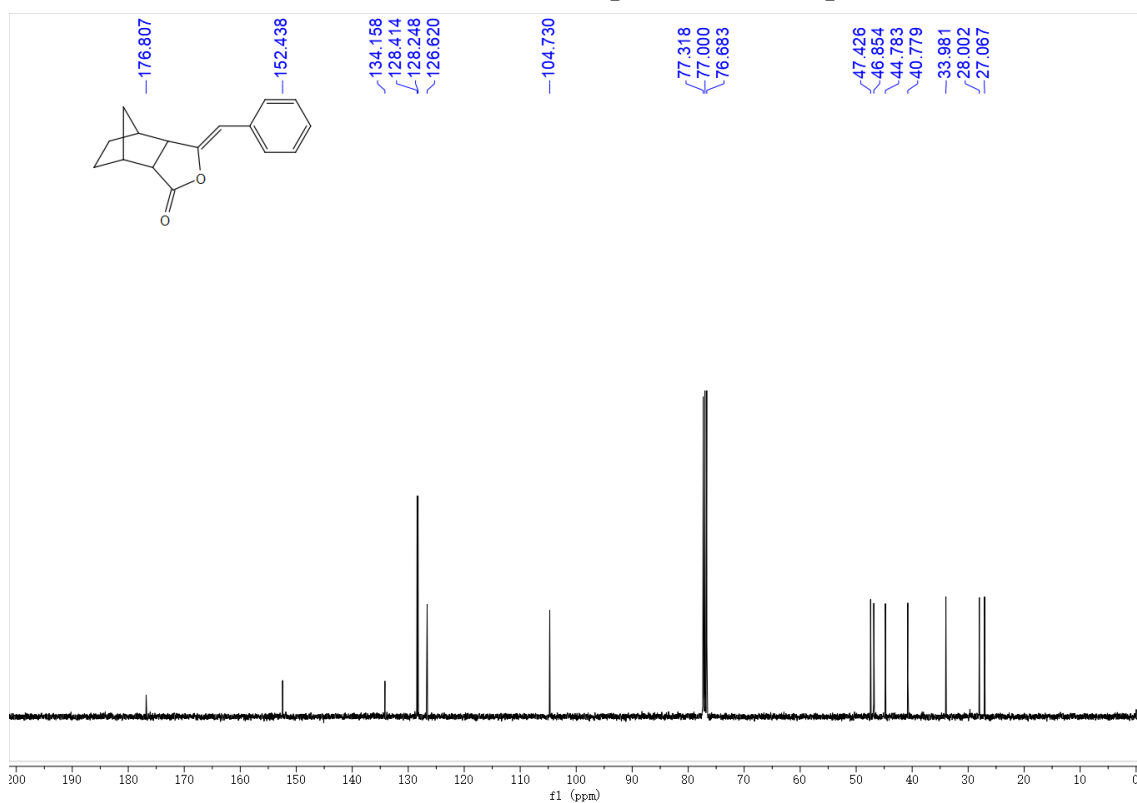

# SUPPORTING INFORMATION

## <sup>1</sup>H NMR (500 MHz, CDCl<sub>3</sub>) spectrum of compound 7d

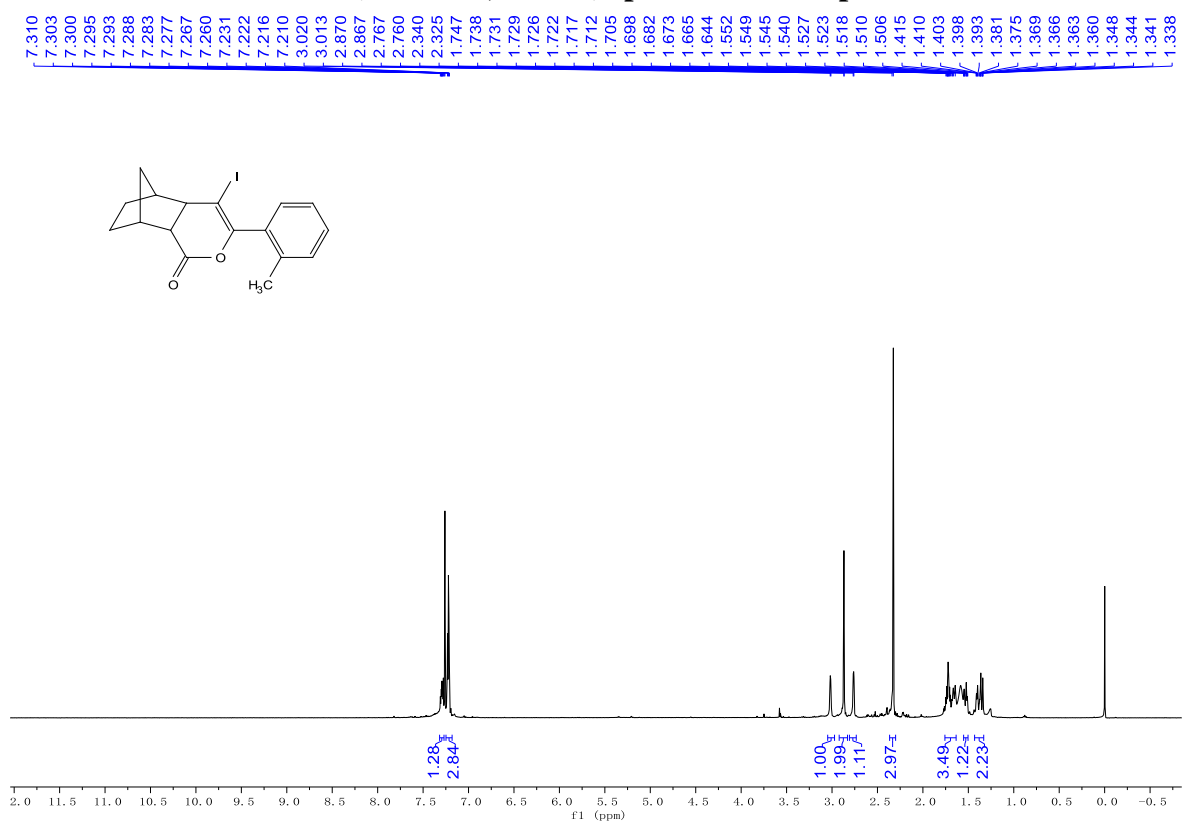

## <sup>13</sup>C NMR (125 MHz, CDCl<sub>3</sub>) spectrum of compound 7d

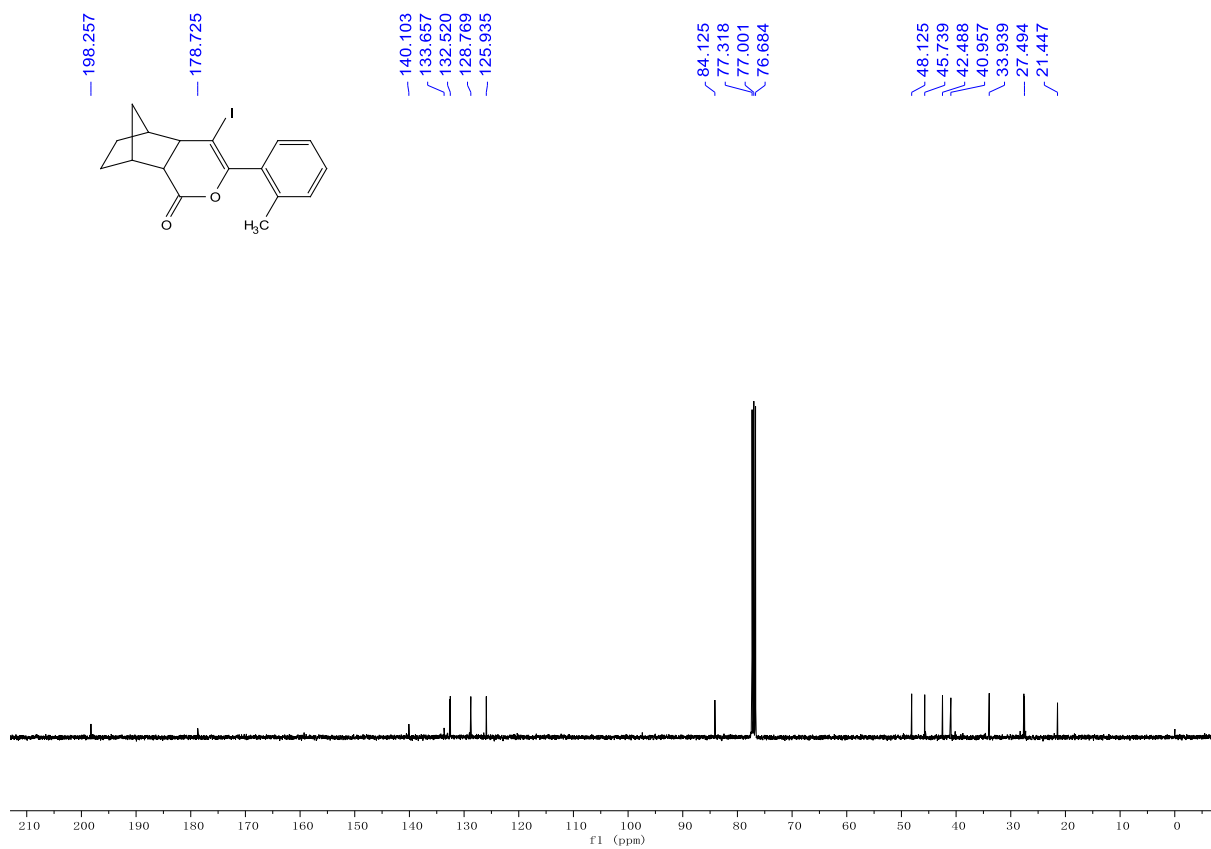

# SUPPORTING INFORMATION

## <sup>1</sup>H NMR (500 MHz, CDCl<sub>3</sub>) spectrum of compound 8a

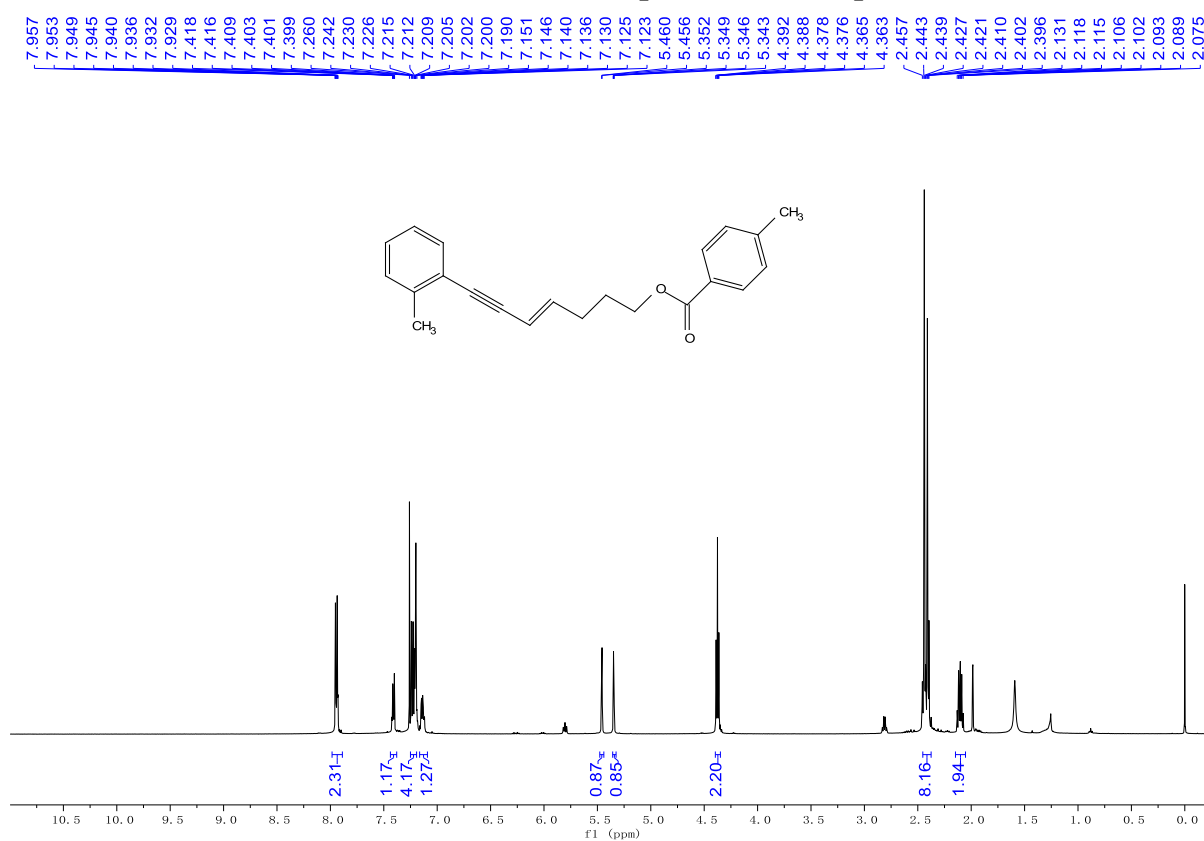

## <sup>13</sup>C NMR (125 MHz, CDCl<sub>3</sub>) spectrum of compound 8a

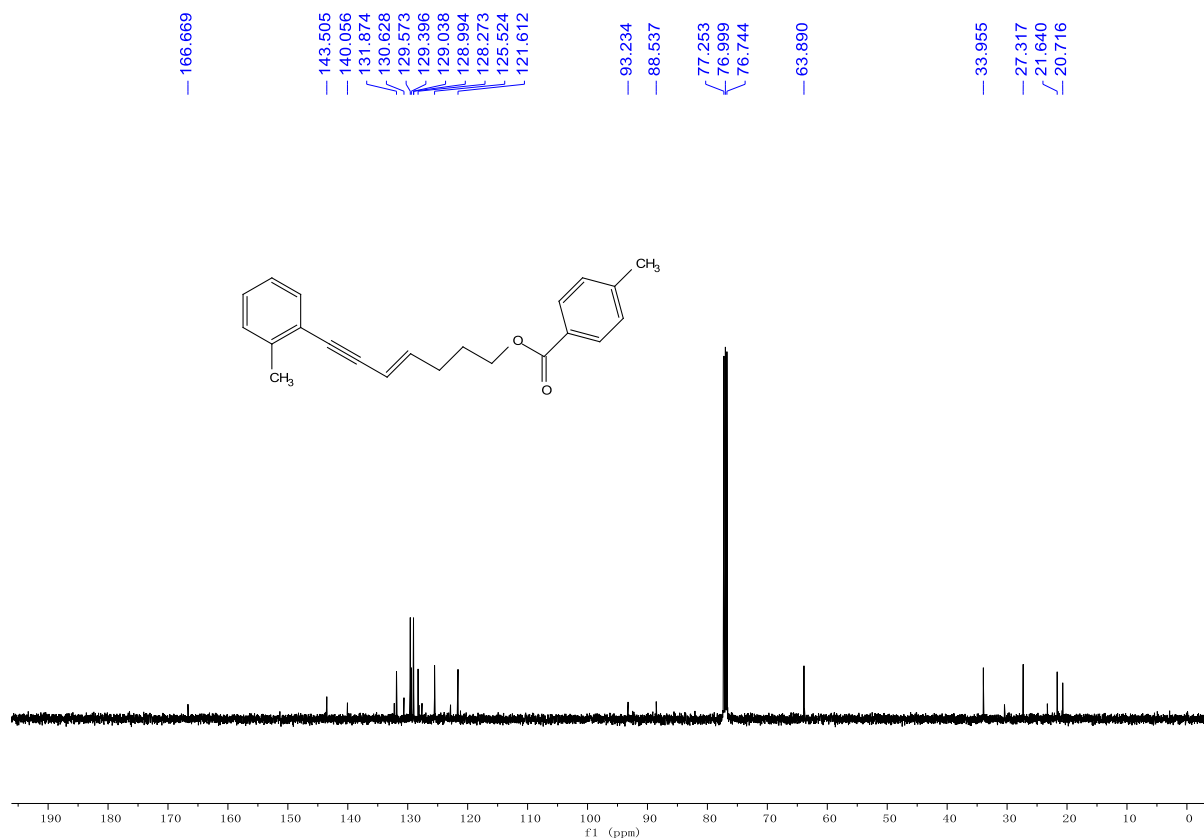

# SUPPORTING INFORMATION

## <sup>1</sup>H NMR (500 MHz, CDCl<sub>3</sub>) spectrum of compound 8b

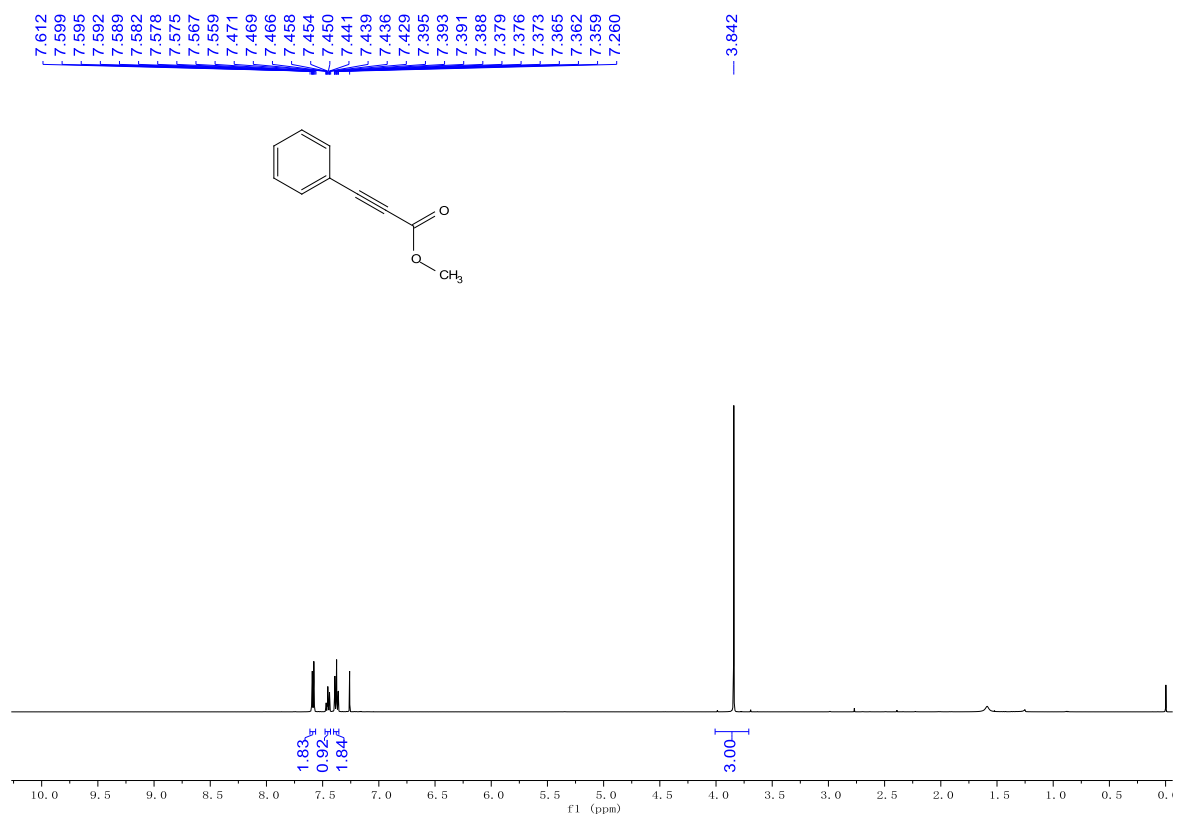

## <sup>13</sup>C NMR (125 MHz, CDCl<sub>3</sub>) spectrum of compound 8b

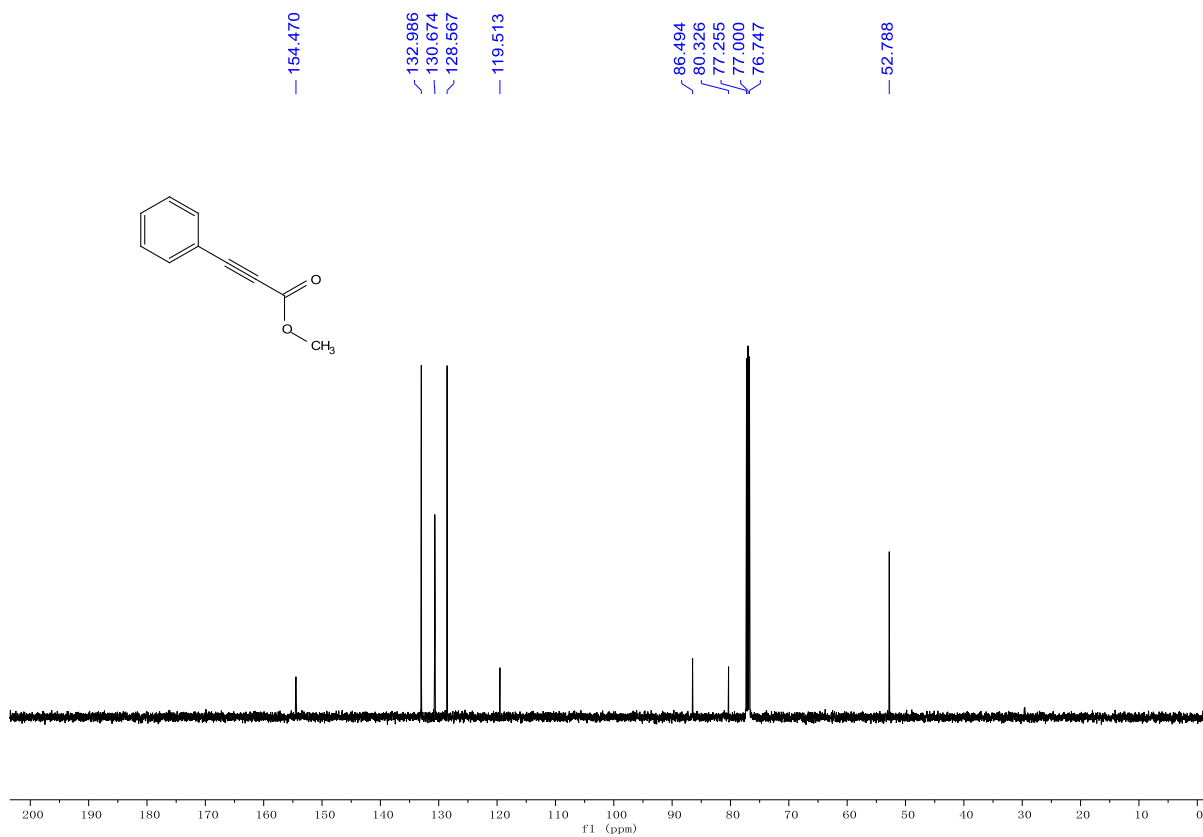

# SUPPORTING INFORMATION

## <sup>1</sup>H NMR (500 MHz, CDCl<sub>3</sub>) spectrum of compound 4ax

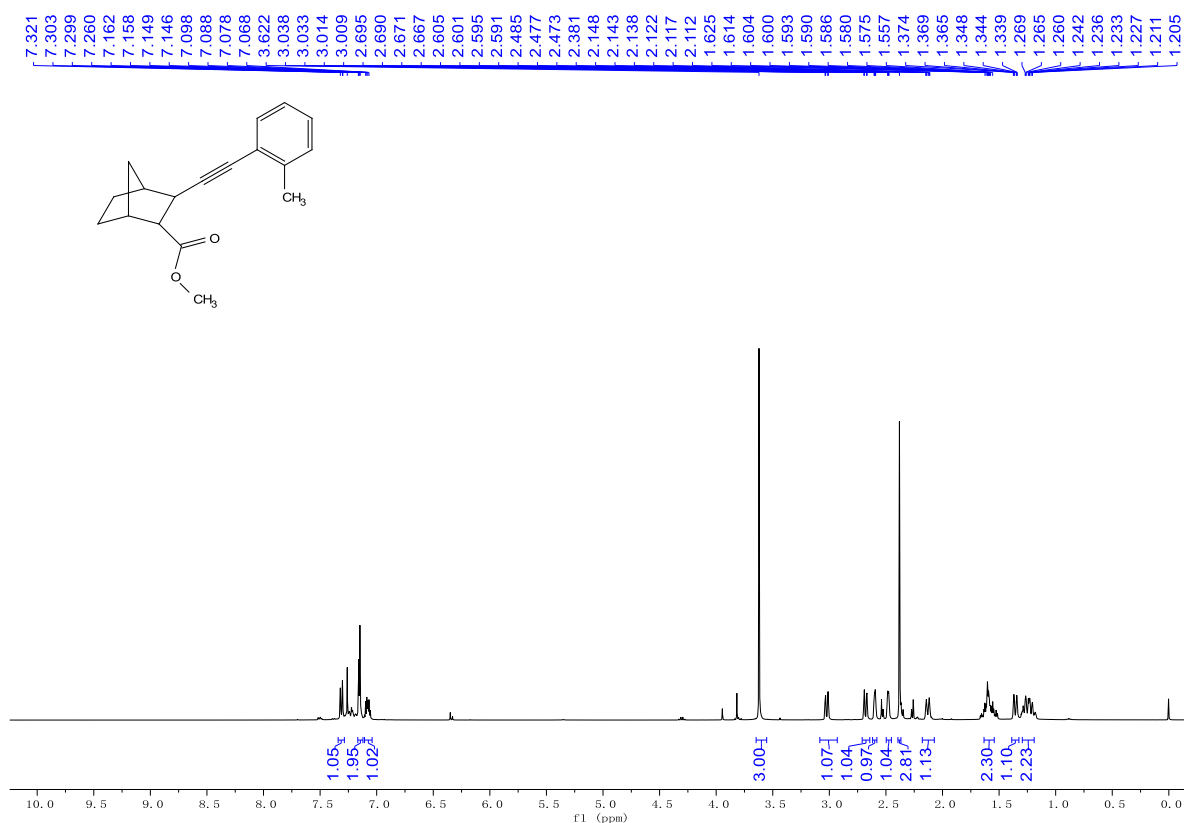

## <sup>13</sup>C NMR (125 MHz, CDCl<sub>3</sub>) spectrum of compound 4ax

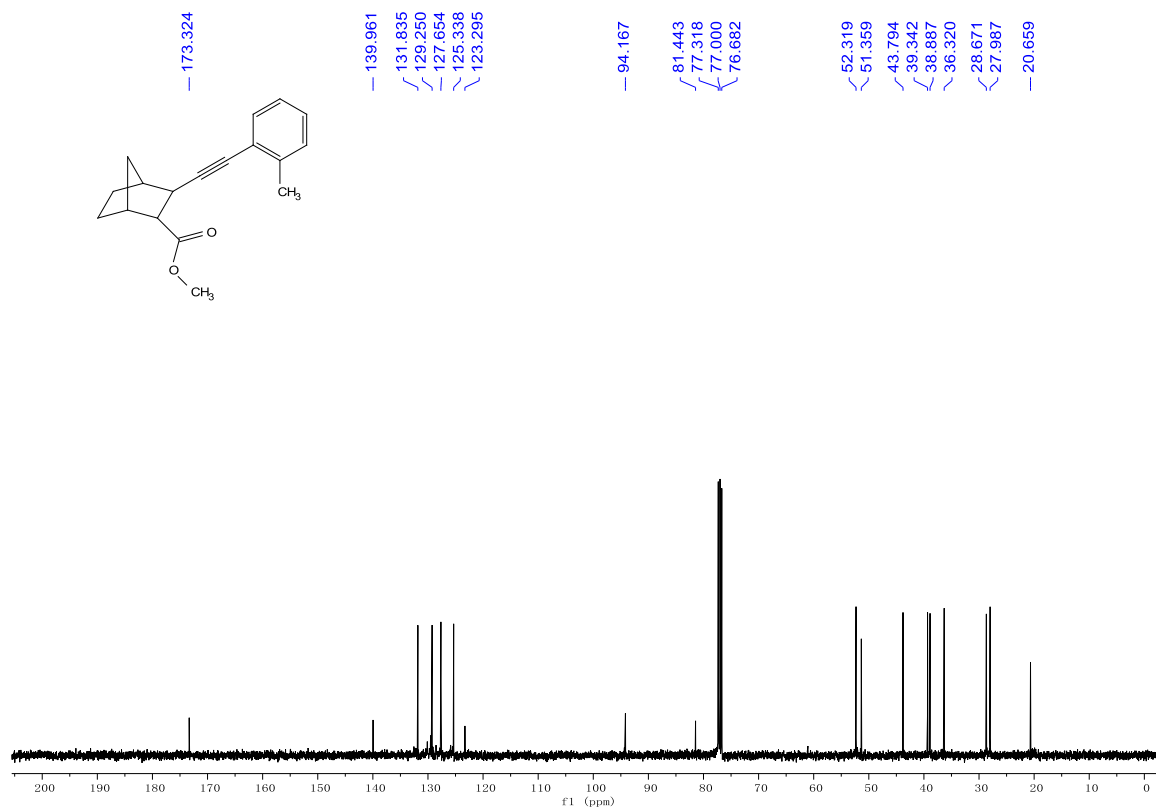

# SUPPORTING INFORMATION

## <sup>1</sup>H NMR (500 MHz, CDCl<sub>3</sub>) spectrum of compound 4au

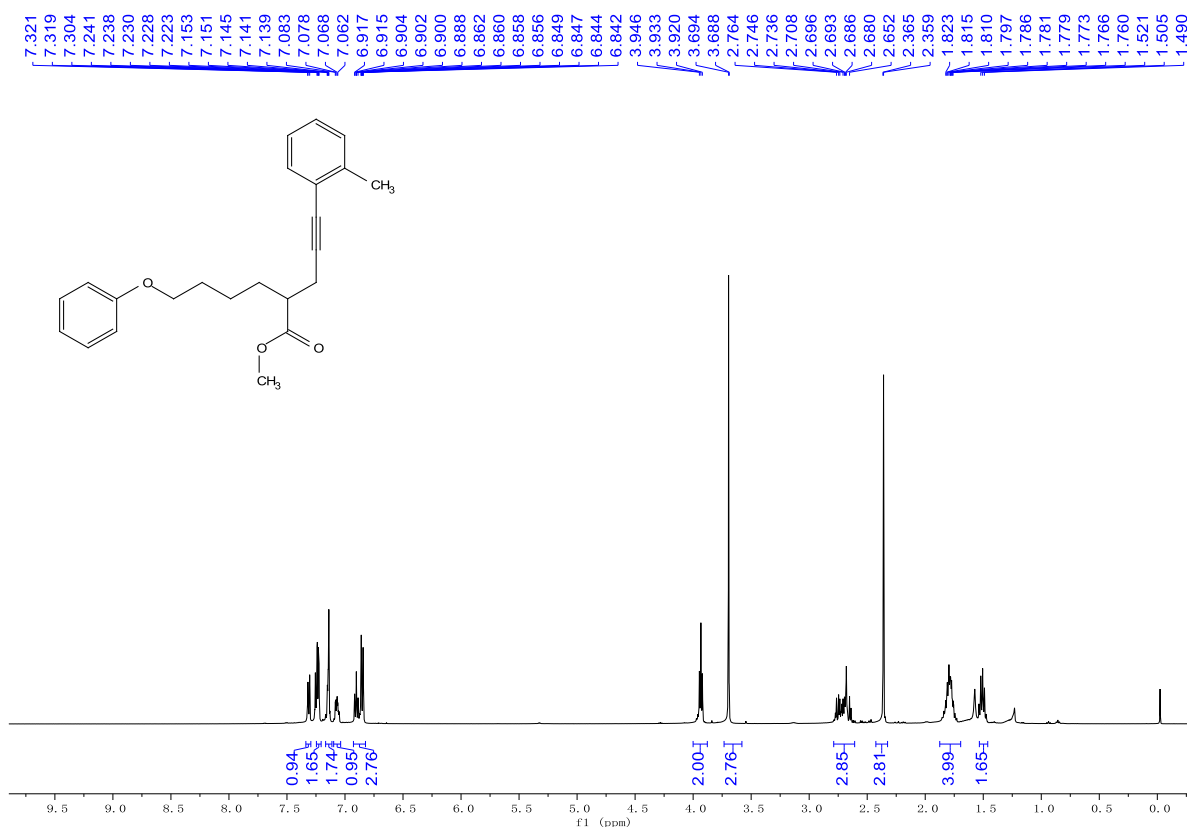

## <sup>13</sup>C NMR (125 MHz, CDCl<sub>3</sub>) spectrum of compound 4au

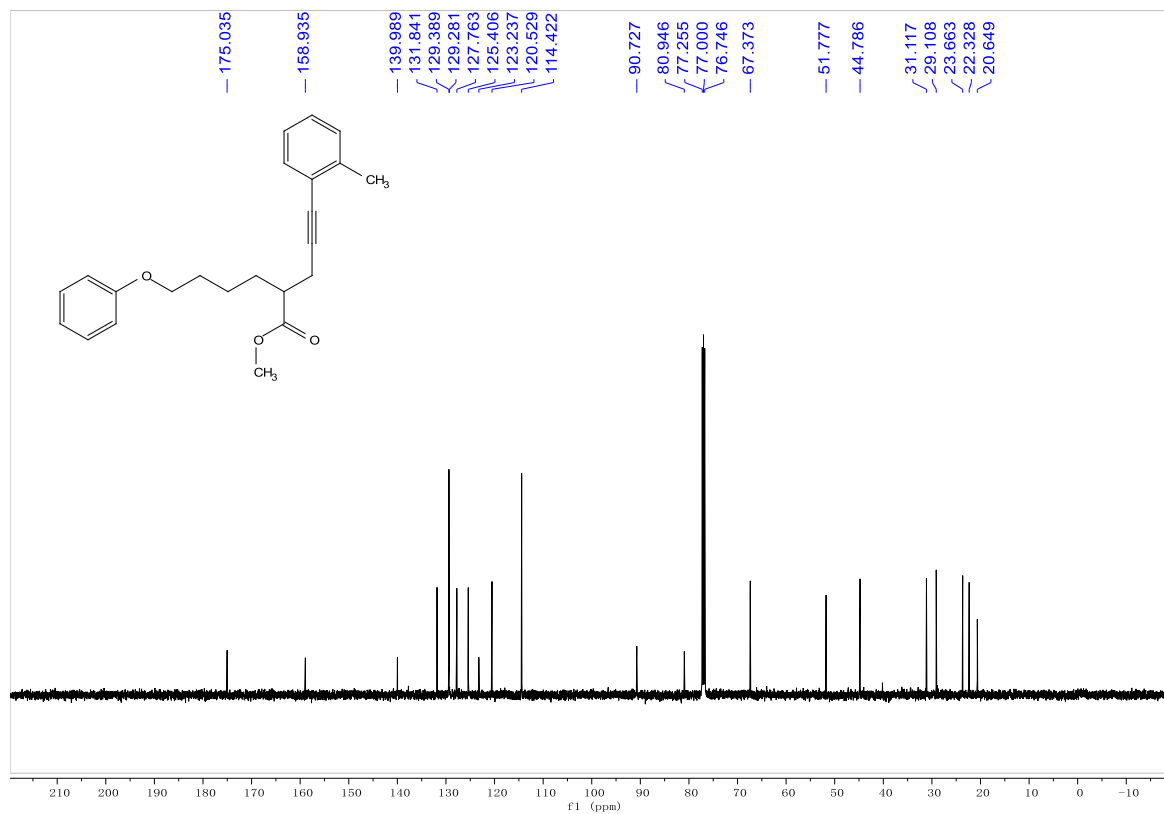

# SUPPORTING INFORMATION

## HSQC spectrum of compound 4au

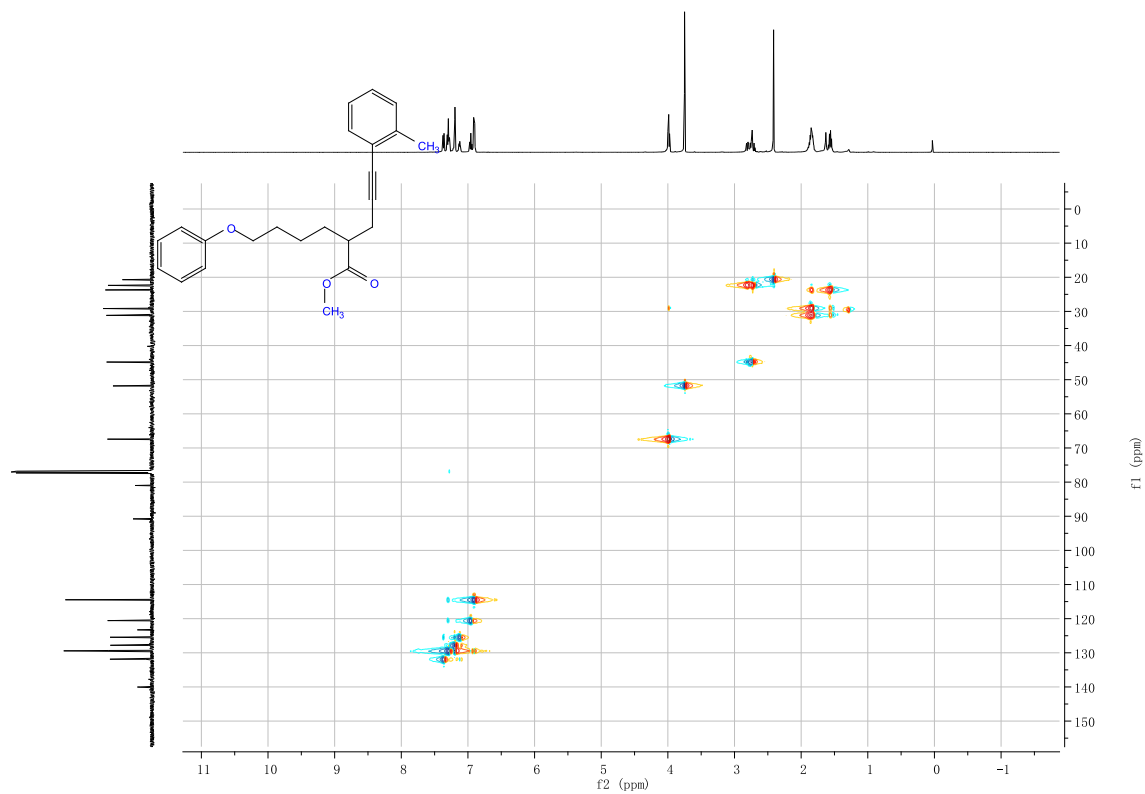

## HMBC spectrum of compound 4au

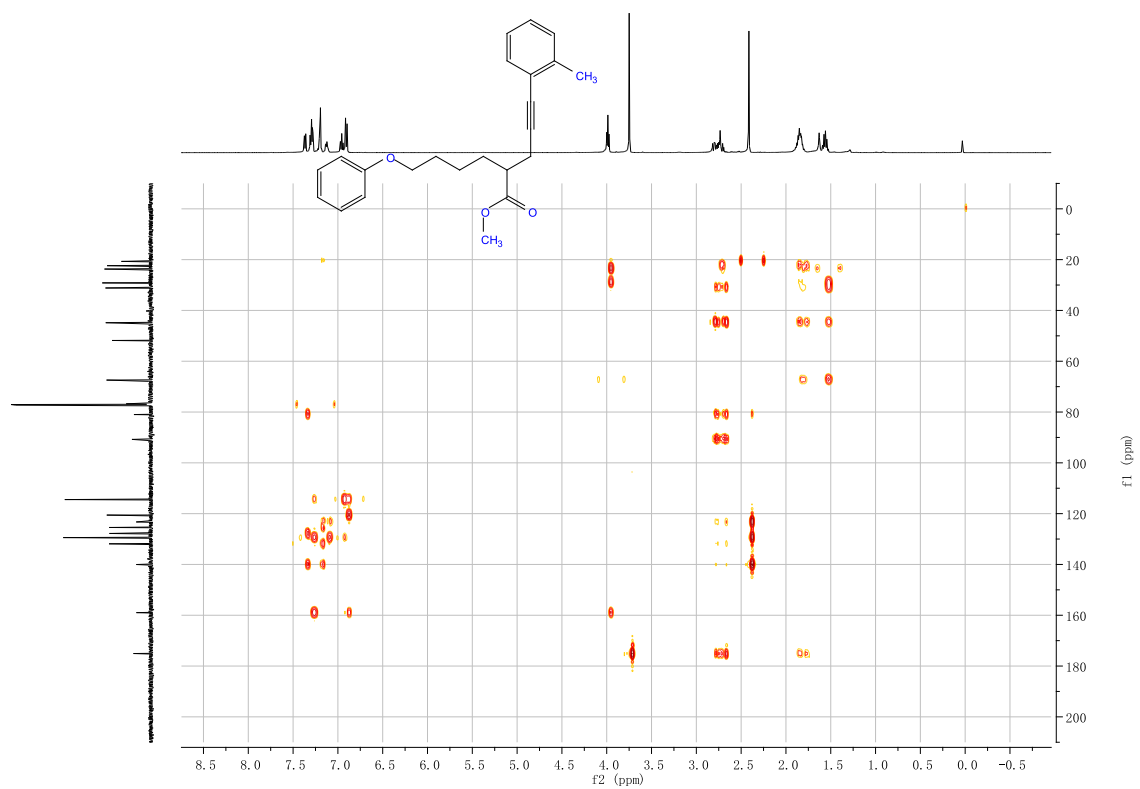

# SUPPORTING INFORMATION

## DEPT-135 spectrum of compound 4au

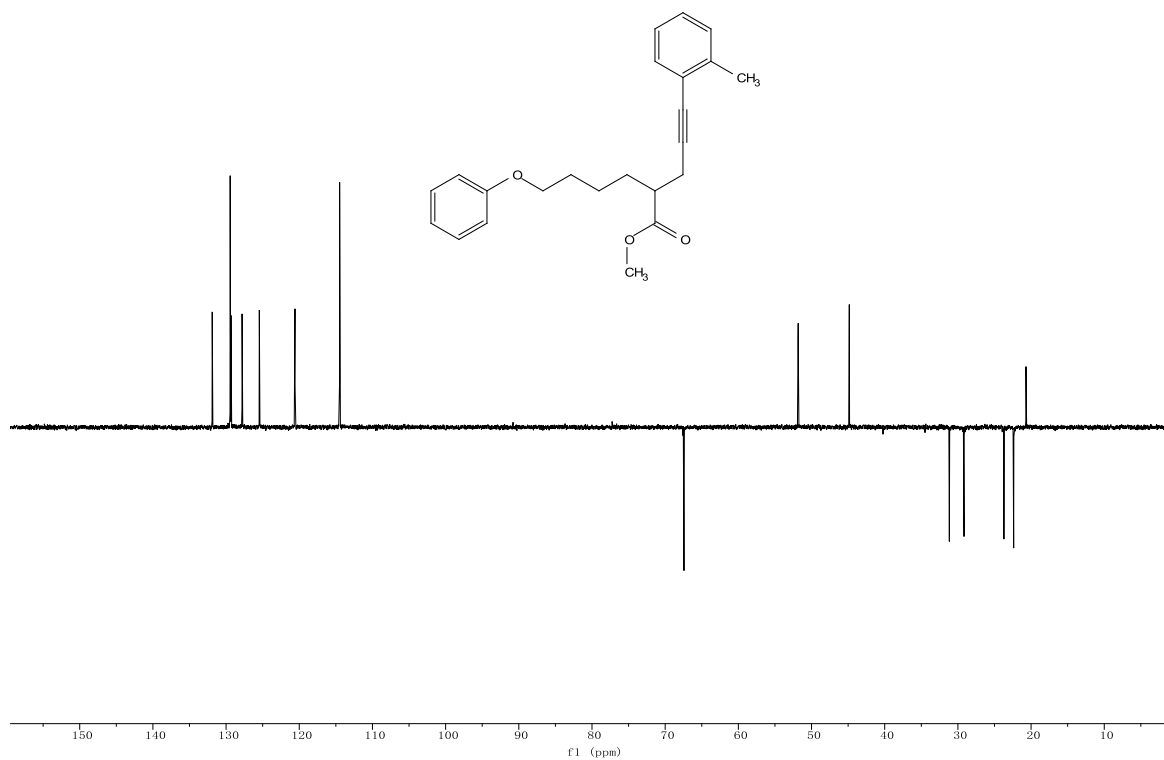

## DEPT-90 spectrum of compound 4au

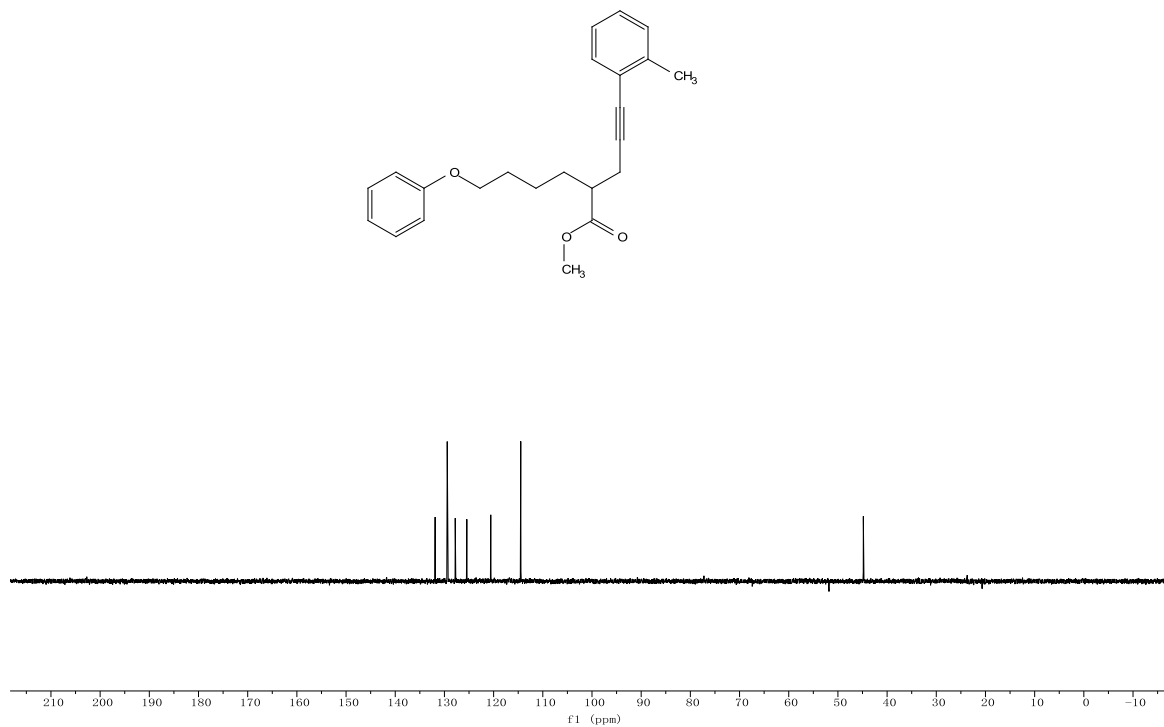



## 9. Density functional theory (DFT) calculations

### Computational details

Considering acetonitrile as polar solvent, all structures were optimized and characterized in acetonitrile with the SMD<sup>[8]</sup> solvent model (SCRF=SMD) at B3LYP<sup>[9]</sup>-D3(BJ)<sup>[10]</sup>/BSI level, BSI representing a basis set with SDD<sup>[11]</sup> for Pd, Fe, Br and 6-31G(d,p) for other atoms. Harmonic frequency analysis calculations at the same level were performed to verify the optimized geometries to be minima (no imaginary frequency) or transition states (TSs, having unique one imaginary frequency). The energies were further improved by M06<sup>[12]</sup>/BSII//B3LYP-D3(BJ)/BSI single-point calculations with solvent effects accounted by the SMD solvent model, using the experimental solvent (acetonitrile), BSII denotes a basis set with SDD for Pd and 6-311++G(d,p) for other atoms. All DFT calculations were carried out using Gaussian 09 program.<sup>[13]</sup> Selected computed structures are illustrated using the CYLview.<sup>[14]</sup>

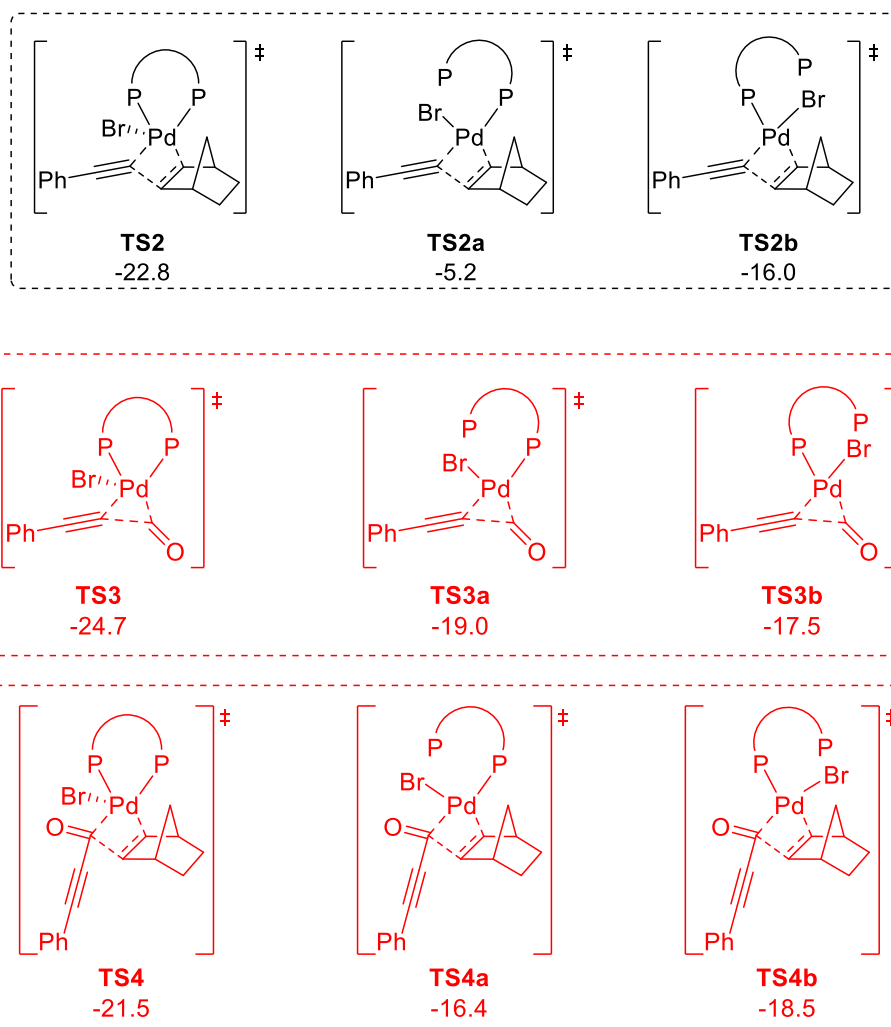

**Figure S2.** Conformational search of the key transition states.

## SUPPORTING INFORMATION

**Cartesian Coordinates in Å, SCF Energies and Free Energies (in a.u.) at 298.15 K and 1 atm  
for the Optimized Structures [BSI=6-31G(d,p), BSII=6-311++G(d,p)]**

### L<sub>2</sub>Pd(0)

B3LYP-D3/BSI SCF energy in acetonitrile: -2247.248697 a.u.

M06/BSII SCF energy in acetonitrile: -2246.389538 a.u.

M06/BSII free energy in acetonitrile: -2245.93949 a.u.

|    |             |             |             |
|----|-------------|-------------|-------------|
| Pd | 0.00370100  | -0.05603100 | -1.58872100 |
| P  | -2.05772500 | -0.01497600 | -0.58245600 |
| P  | 2.05528000  | -0.02871100 | -0.56906700 |
| Fe | -0.01025100 | 0.16675500  | 2.20962500  |
| C  | 2.06138900  | 0.17476800  | 2.38787800  |
| C  | 0.73028100  | -1.62821400 | 2.95323600  |
| C  | 1.47792300  | -0.53208600 | 3.48141900  |
| C  | -0.86753600 | 1.81528100  | 1.30059000  |
| C  | -1.50934300 | 1.02209500  | 3.36942000  |
| C  | -0.76557300 | 2.04277500  | 2.70282000  |
| H  | 2.66677500  | 1.06748200  | 2.45870900  |
| H  | 0.13966200  | -2.33205300 | 3.52508700  |
| H  | 1.55387900  | -0.25692100 | 4.52557300  |
| H  | -0.38404000 | 2.39318700  | 0.52571000  |
| H  | -1.59150500 | 0.89027200  | 4.44073700  |
| H  | -0.18506000 | 2.82256600  | 3.17838300  |
| C  | 0.84254300  | -1.59265100 | 1.53361900  |
| C  | 1.67678600  | -0.47986200 | 1.17051800  |
| C  | -2.07892900 | 0.16848000  | 2.37804900  |
| C  | -1.68855400 | 0.65436800  | 1.08555900  |
| H  | 0.35843300  | -2.26510100 | 0.83967200  |
| H  | -2.67431100 | -0.71386500 | 2.56628500  |
| C  | -3.51141500 | 1.00333900  | -1.09938100 |
| C  | -3.85086400 | 1.00699300  | -2.46236100 |
| C  | -4.27824300 | 1.76651700  | -0.20449300 |
| C  | -4.94538500 | 1.74316000  | -2.91939600 |
| H  | -3.25248000 | 0.43324600  | -3.16704400 |
| C  | -5.36711200 | 2.51145200  | -0.66489900 |
| H  | -4.02980600 | 1.77720500  | 0.85245300  |
| C  | -5.70473100 | 2.49884900  | -2.02080600 |
| H  | -5.19933100 | 1.73486100  | -3.97576100 |
| H  | -5.95247400 | 3.09909800  | 0.03712700  |
| H  | -6.55141200 | 3.07932400  | -2.37641600 |
| C  | 3.45179000  | -1.16407800 | -0.98562600 |
| C  | 4.20961700  | -1.84945600 | -0.02296700 |
| C  | 3.75444600  | -1.34286900 | -2.34555600 |
| C  | 5.25279800  | -2.69238400 | -0.41568400 |
| H  | 3.98938500  | -1.72392500 | 1.03289700  |
| C  | 4.80409900  | -2.17594500 | -2.73607500 |
| H  | 3.16198600  | -0.82858500 | -3.09933300 |

## SUPPORTING INFORMATION

|   |             |             |             |
|---|-------------|-------------|-------------|
| C | 5.55367900  | -2.85505200 | -1.77069200 |
| H | 5.83161000  | -3.21957000 | 0.33783200  |
| H | 5.02998100  | -2.30259600 | -3.79130500 |
| H | 6.36483700  | -3.51127100 | -2.07341900 |
| C | 2.90314800  | 1.60190200  | -0.36042300 |
| C | 4.19067600  | 1.71921600  | 0.18863000  |
| C | 2.21639000  | 2.76632600  | -0.73838300 |
| C | 4.77056700  | 2.97660800  | 0.36810100  |
| H | 4.74286700  | 0.82995800  | 0.47796400  |
| C | 2.79441700  | 4.02487600  | -0.55221300 |
| H | 1.22661600  | 2.68189400  | -1.17991700 |
| C | 4.07205600  | 4.13182400  | 0.00286300  |
| H | 5.76744200  | 3.05414000  | 0.79325900  |
| H | 2.24962100  | 4.91775300  | -0.84625700 |
| H | 4.52548800  | 5.10907300  | 0.14329300  |
| C | -2.83011900 | -1.64888600 | -0.18614100 |
| C | -4.09264200 | -1.75912000 | 0.41932400  |
| C | -2.11259300 | -2.81910800 | -0.48002900 |
| C | -4.61668500 | -3.01335000 | 0.73828200  |
| H | -4.66871000 | -0.86644400 | 0.64383700  |
| C | -2.63583800 | -4.07408600 | -0.15731300 |
| H | -1.14158100 | -2.74189800 | -0.96328600 |
| C | -3.88787900 | -4.17277300 | 0.45465800  |
| H | -5.59386700 | -3.08534600 | 1.20782800  |
| H | -2.06822800 | -4.97115100 | -0.38877800 |
| H | -4.29775600 | -5.14766400 | 0.70345600  |

### CO

B3LYP-D3/BSI SCF energy in acetonitrile: -113.3020108 a.u.

M06/BSII SCF energy in acetonitrile: -113.280864 a.u.

M06/BSII free energy in acetonitrile: -113.29497 a.u.

|   |            |            |             |
|---|------------|------------|-------------|
| C | 0.00000000 | 0.00000000 | -0.64995200 |
| O | 0.00000000 | 0.00000000 | 0.48746400  |

### L<sub>2</sub>Pd(0)(CO)<sub>2</sub>

B3LYP-D3/BSI SCF energy in acetonitrile: -2473.946021 a.u.

M06/BSII SCF energy in acetonitrile: -2473.022382 a.u.

M06/BSII free energy in acetonitrile: -2472.563839 a.u.

|    |             |             |             |
|----|-------------|-------------|-------------|
| Pd | 0.01634900  | 0.18941600  | -1.69493700 |
| P  | 1.94116400  | 0.04982100  | -0.19842300 |
| P  | -1.93470400 | 0.01764600  | -0.22594800 |
| Fe | -0.01082600 | -0.43175300 | 2.55718700  |
| C  | -2.07456300 | -0.42091700 | 2.68973500  |
| C  | -0.73647600 | 1.30382200  | 3.44976500  |
| C  | -1.51755500 | 0.17972000  | 3.85708000  |
| C  | 0.79466600  | -1.98071700 | 1.46661600  |
| C  | 1.48047700  | -1.43920300 | 3.60270000  |
| C  | 0.70979800  | -2.36547900 | 2.83530600  |

## SUPPORTING INFORMATION

|   |             |             |             |
|---|-------------|-------------|-------------|
| H | -2.69342600 | -1.30670100 | 2.66305500  |
| H | -0.15538500 | 1.94585200  | 4.09875800  |
| H | -1.63264300 | -0.18151600 | 4.87081400  |
| H | 0.29861900  | -2.45568500 | 0.63243300  |
| H | 1.58029400  | -1.43361700 | 4.68041900  |
| H | 0.12355000  | -3.18610000 | 3.22771000  |
| C | -0.80126800 | 1.39434400  | 2.02976400  |
| C | -1.63162300 | 0.32619200  | 1.54525200  |
| C | 2.04937500  | -0.48476500 | 2.70847800  |
| C | 1.62522200  | -0.81196800 | 1.37539900  |
| H | -0.29398300 | 2.12261800  | 1.41418600  |
| H | 2.65854300  | 0.36404600  | 2.98542800  |
| C | 3.34413500  | -0.90839700 | -0.91844300 |
| C | 3.70953300  | -0.63469600 | -2.24757100 |
| C | 4.04322600  | -1.89593400 | -0.20879500 |
| C | 4.76034100  | -1.32633900 | -2.85043000 |
| H | 3.16323200  | 0.11715900  | -2.81190200 |
| C | 5.08825800  | -2.59639700 | -0.81898500 |
| H | 3.77573900  | -2.12045800 | 0.81912900  |
| C | 5.45027600  | -2.31245000 | -2.13765000 |
| H | 5.03406400  | -1.10289600 | -3.87790100 |
| H | 5.61992500  | -3.36193900 | -0.26045800 |
| H | 6.26247900  | -2.85803900 | -2.60969900 |
| C | -3.25897100 | 1.23865500  | -0.63020600 |
| C | -3.94938400 | 1.97165000  | 0.34679900  |
| C | -3.57654900 | 1.43850100  | -1.98436000 |
| C | -4.93866200 | 2.88670800  | -0.02529800 |
| H | -3.71925700 | 1.83059000  | 1.39825000  |
| C | -4.57261800 | 2.34334300  | -2.35289300 |
| H | -3.03514500 | 0.88876400  | -2.75038500 |
| C | -5.25413800 | 3.07251500  | -1.37323800 |
| H | -5.46403300 | 3.45069400  | 0.74056700  |
| H | -4.80995000 | 2.48584700  | -3.40356200 |
| H | -6.02375900 | 3.78356100  | -1.66002400 |
| C | -2.86645800 | -1.57825200 | -0.18400900 |
| C | -4.17979600 | -1.65193200 | 0.31100900  |
| C | -2.24405000 | -2.75133300 | -0.63312900 |
| C | -4.84771800 | -2.87631600 | 0.36384600  |
| H | -4.68350400 | -0.75355400 | 0.65513400  |
| C | -2.91080000 | -3.97819400 | -0.57475500 |
| H | -1.23685600 | -2.70643900 | -1.03358400 |
| C | -4.21359800 | -4.04283200 | -0.07579400 |
| H | -5.86341200 | -2.91900900 | 0.74712300  |
| H | -2.41360600 | -4.87838200 | -0.92517000 |
| H | -4.73556200 | -4.99468600 | -0.03513000 |
| C | 2.76728100  | 1.60661700  | 0.35275900  |
| C | 4.05166200  | 1.59811300  | 0.92301600  |
| C | 2.09277100  | 2.82760100  | 0.21345300  |
| C | 4.63798800  | 2.78753900  | 1.35843100  |
| H | 4.59507500  | 0.66351300  | 1.02575400  |

## SUPPORTING INFORMATION

|   |             |             |             |
|---|-------------|-------------|-------------|
| C | 2.67877700  | 4.01801000  | 0.65229100  |
| H | 1.10766000  | 2.84750100  | -0.24126200 |
| C | 3.95160400  | 3.99929400  | 1.22690900  |
| H | 5.63154200  | 2.76895900  | 1.79752500  |
| H | 2.14299300  | 4.95627500  | 0.53876600  |
| H | 4.41098700  | 4.92394300  | 1.56471200  |
| C | -0.18701700 | 1.97879700  | -2.46720100 |
| O | -0.36358800 | 3.03894900  | -2.89300800 |
| C | 0.27303700  | -1.40176400 | -2.80696800 |
| O | 0.52674400  | -2.34783300 | -3.42176400 |

### 1a

B3LYP-D3/BSI SCF energy in acetonitrile: -321.1744861 a.u.

M06/BSII SCF energy in acetonitrile: -320.9685184 a.u.

M06/BSII free energy in acetonitrile: -320.9025884 a.u.

|    |             |             |            |
|----|-------------|-------------|------------|
| C  | -1.37453000 | 0.00013400  | 0.00000000 |
| C  | -2.08499600 | 1.21699800  | 0.00000000 |
| C  | -2.08472900 | -1.21688500 | 0.00000000 |
| C  | -3.47853100 | 1.21054500  | 0.00000000 |
| H  | -1.53885900 | 2.15518200  | 0.00000000 |
| C  | -3.47828400 | -1.21072200 | 0.00000000 |
| H  | -1.53840000 | -2.15495200 | 0.00000000 |
| C  | -4.17817800 | -0.00016800 | 0.00000000 |
| H  | -4.01931700 | 2.15241300  | 0.00000000 |
| H  | -4.01886500 | -2.15270600 | 0.00000000 |
| H  | -5.26436900 | -0.00031800 | 0.00000000 |
| Br | 3.10066700  | -0.00003000 | 0.00000000 |
| C  | 0.05513700  | 0.00021100  | 0.00000000 |
| C  | 1.26685600  | 0.00012400  | 0.00000000 |

### INT1

B3LYP-D3/BSI SCF energy in acetonitrile: -2568.496482 a.u.

M06/BSII SCF energy in acetonitrile: -2567.412503 a.u.

M06/BSII free energy in acetonitrile: -2566.871266 a.u.

|    |             |             |             |
|----|-------------|-------------|-------------|
| Pd | 0.48327600  | -0.69814600 | -0.07189900 |
| P  | -1.86654000 | -0.55516100 | -0.07359300 |
| P  | 1.05552300  | 1.58119100  | -0.06096800 |
| Fe | -1.89451000 | 2.55902200  | 1.32630400  |
| C  | -0.29752700 | 3.86699200  | 1.25096100  |
| C  | -1.02303600 | 2.84767400  | 3.19611500  |
| C  | -1.01929400 | 4.07323000  | 2.46272800  |
| C  | -2.70602000 | 2.19681000  | -0.52898800 |
| C  | -3.97445000 | 2.66314700  | 1.34389000  |
| C  | -3.46496100 | 3.20849800  | 0.12703500  |
| H  | -0.15581900 | 4.59691800  | 0.46687000  |
| H  | -1.52610600 | 2.67125500  | 4.13774900  |
| H  | -1.52072700 | 4.98816400  | 2.75063700  |

## SUPPORTING INFORMATION

|   |             |             |             |
|---|-------------|-------------|-------------|
| H | -2.17025800 | 2.30864800  | -1.45967100 |
| H | -4.55557000 | 3.19406100  | 2.08661700  |
| H | -3.59005900 | 4.22677100  | -0.21730600 |
| C | -0.30650500 | 1.87799800  | 2.43809700  |
| C | 0.15027000  | 2.50180700  | 1.22340300  |
| C | -3.54030500 | 1.30850500  | 1.43838800  |
| C | -2.74826400 | 1.00749900  | 0.27874600  |
| H | -0.16322100 | 0.83697300  | 2.69597200  |
| H | -3.73940200 | 0.63138500  | 2.25710300  |
| C | -2.62305800 | -1.10717700 | -1.66036000 |
| C | -1.91816400 | -2.03715200 | -2.44263800 |
| C | -3.86505900 | -0.63469000 | -2.11407600 |
| C | -2.44928000 | -2.49266400 | -3.65041300 |
| H | -0.95217800 | -2.39938200 | -2.10366600 |
| C | -4.39149800 | -1.08855700 | -3.32569700 |
| H | -4.42145100 | 0.08830800  | -1.52616500 |
| C | -3.68629100 | -2.01757400 | -4.09525700 |
| H | -1.89350900 | -3.21170700 | -4.24586100 |
| H | -5.35268800 | -0.71497600 | -3.66758400 |
| H | -4.09665300 | -2.36659300 | -5.03863300 |
| C | 2.81709400  | 2.00548400  | 0.27141700  |
| C | 3.25537300  | 2.33033200  | 1.56380200  |
| C | 3.76089600  | 1.89325200  | -0.76288400 |
| C | 4.61412400  | 2.53976800  | 1.81559700  |
| H | 2.54116600  | 2.41766500  | 2.37699700  |
| C | 5.11564800  | 2.10826200  | -0.50923100 |
| H | 3.43881400  | 1.63735900  | -1.76856800 |
| C | 5.54698700  | 2.43008900  | 0.78137600  |
| H | 4.94059600  | 2.79327300  | 2.82035900  |
| H | 5.83521200  | 2.01832200  | -1.31809400 |
| H | 6.60244800  | 2.59395600  | 0.97884000  |
| C | 0.71785700  | 2.46686900  | -1.63804200 |
| C | 1.11657600  | 3.79867900  | -1.84060100 |
| C | 0.04997500  | 1.78850600  | -2.66931600 |
| C | 0.82213000  | 4.44729500  | -3.04066200 |
| H | 1.66408600  | 4.32649700  | -1.06558700 |
| C | -0.24077100 | 2.43843200  | -3.87181200 |
| H | -0.25120100 | 0.75467000  | -2.52712700 |
| C | 0.13962600  | 3.76954900  | -4.05659000 |
| H | 1.12995700  | 5.47902800  | -3.18509400 |
| H | -0.76184600 | 1.90339600  | -4.66072000 |
| H | -0.08589200 | 4.27613300  | -4.99073000 |
| C | -2.59033700 | -1.66705900 | 1.20758900  |
| C | -3.88560600 | -2.19518900 | 1.09558100  |
| C | -1.82881900 | -1.95463300 | 2.35017300  |
| C | -4.40716600 | -2.99984600 | 2.11048300  |
| H | -4.48937500 | -1.98334400 | 0.21834200  |
| C | -2.35666300 | -2.74988900 | 3.36986300  |
| H | -0.81802300 | -1.56544100 | 2.43400300  |
| C | -3.64552400 | -3.27619300 | 3.25028000  |

## SUPPORTING INFORMATION

|    |             |             |             |
|----|-------------|-------------|-------------|
| H  | -5.40868800 | -3.40917100 | 2.01167500  |
| H  | -1.75783900 | -2.96512800 | 4.25051100  |
| H  | -4.05392300 | -3.90191400 | 4.03888100  |
| C  | 4.22544400  | -3.25075700 | -0.57842100 |
| C  | 5.61119800  | -3.39036800 | -0.51984600 |
| C  | 6.38706500  | -2.44876000 | 0.16581700  |
| C  | 5.76469200  | -1.36320900 | 0.78923600  |
| C  | 4.37943600  | -1.21320100 | 0.72594200  |
| C  | 3.58650800  | -2.15797000 | 0.04713000  |
| H  | 3.62429400  | -3.98090700 | -1.11269400 |
| H  | 6.08752300  | -4.23593700 | -1.00889200 |
| H  | 7.46692800  | -2.55925600 | 0.20955600  |
| H  | 6.35845000  | -0.62251600 | 1.31738000  |
| H  | 3.90090300  | -0.36262200 | 1.19891900  |
| C  | 2.14562800  | -2.03144000 | -0.01024900 |
| C  | 1.00778800  | -2.63195800 | -0.08060200 |
| Br | 0.33976000  | -4.46961400 | -0.02742600 |

### TS1

B3LYP-D3/BSI SCF energy in acetonitrile: -2568.454992 a.u.

M06/BSII SCF energy in acetonitrile: -2567.375635 a.u.

M06/BSII free energy in acetonitrile: -2566.836703 a.u.

|    |             |             |             |
|----|-------------|-------------|-------------|
| Pd | -0.22607000 | -0.11647200 | -1.12727500 |
| P  | -2.32279300 | -0.09045100 | -0.03460400 |
| P  | 1.66271700  | 1.13556600  | -0.45692900 |
| Fe | -0.37785700 | 1.62349500  | 2.26727200  |
| C  | 1.59006300  | 2.27470600  | 2.27801000  |
| C  | 0.84299700  | 0.44383500  | 3.47561800  |
| C  | 1.22507000  | 1.81591700  | 3.57804200  |
| C  | -1.65905600 | 2.54514100  | 0.92932600  |
| C  | -2.04706500 | 2.43480500  | 3.20119500  |
| C  | -1.61411000 | 3.29012900  | 2.14227400  |
| H  | 1.89725800  | 3.27910400  | 2.02304100  |
| H  | 0.48029400  | -0.17961400 | 4.28238000  |
| H  | 1.19943100  | 2.41845700  | 4.47693100  |
| H  | -1.36166500 | 2.89980500  | -0.04715900 |
| H  | -2.08296000 | 2.69068300  | 4.25227400  |
| H  | -1.26513400 | 4.30906900  | 2.24719300  |
| C  | 0.96446900  | 0.05385100  | 2.11249800  |
| C  | 1.43428200  | 1.18502700  | 1.35632400  |
| C  | -2.37114200 | 1.16358200  | 2.64088900  |
| C  | -2.13959800 | 1.22363100  | 1.22628300  |
| H  | 0.72157600  | -0.91641400 | 1.70296800  |
| H  | -2.70543500 | 0.29278200  | 3.18722600  |
| C  | -3.88371300 | 0.35744500  | -0.90199200 |
| C  | -4.13154800 | -0.26351500 | -2.13763200 |
| C  | -4.81462900 | 1.27926500  | -0.39917400 |
| C  | -5.29757600 | 0.01921000  | -2.85016500 |
| H  | -3.40549500 | -0.96623900 | -2.54028200 |

## SUPPORTING INFORMATION

|   |             |             |             |
|---|-------------|-------------|-------------|
| C | -5.97641200 | 1.56890500  | -1.11997400 |
| H | -4.63553400 | 1.76957700  | 0.55303300  |
| C | -6.22135900 | 0.93842600  | -2.34285800 |
| H | -5.48044200 | -0.46989300 | -3.80301600 |
| H | -6.69095600 | 2.28511000  | -0.72363700 |
| H | -7.12533000 | 1.16568700  | -2.90091600 |
| C | 3.39352200  | 0.54808000  | -0.66731400 |
| C | 4.32208200  | 0.49143200  | 0.38229300  |
| C | 3.78669700  | 0.14564800  | -1.95431400 |
| C | 5.62572200  | 0.04800600  | 0.14463500  |
| H | 4.03040800  | 0.79229100  | 1.38382700  |
| C | 5.09274200  | -0.28499100 | -2.19218300 |
| H | 3.06621500  | 0.16657000  | -2.76889800 |
| C | 6.01438500  | -0.33658800 | -1.14114600 |
| H | 6.33720000  | 0.00403500  | 0.96455500  |
| H | 5.38717600  | -0.59176400 | -3.19190500 |
| H | 7.02845400  | -0.68111800 | -1.32292300 |
| C | 1.77775500  | 2.91442500  | -0.92749200 |
| C | 2.84611700  | 3.73091600  | -0.52142300 |
| C | 0.75788200  | 3.46481800  | -1.71840100 |
| C | 2.87807400  | 5.07910200  | -0.88156600 |
| H | 3.65264800  | 3.31322500  | 0.07439400  |
| C | 0.79003200  | 4.81520400  | -2.07699000 |
| H | -0.06110700 | 2.83161800  | -2.05214800 |
| C | 1.84841100  | 5.62408100  | -1.65619100 |
| H | 3.70741700  | 5.70338500  | -0.56081600 |
| H | -0.00639400 | 5.23074600  | -2.68799800 |
| H | 1.87685500  | 6.67318200  | -1.93681500 |
| C | -2.80567000 | -1.54280800 | 0.99350400  |
| C | -4.07647600 | -1.66106600 | 1.58004400  |
| C | -1.84991000 | -2.54316900 | 1.22244700  |
| C | -4.37727700 | -2.75799200 | 2.38961000  |
| H | -4.83112100 | -0.89941200 | 1.40698600  |
| C | -2.15162300 | -3.63851900 | 2.03563500  |
| H | -0.87566100 | -2.46551600 | 0.75395200  |
| C | -3.41507200 | -3.74668900 | 2.62171500  |
| H | -5.36281600 | -2.84119700 | 2.83924500  |
| H | -1.40171100 | -4.40692600 | 2.20303200  |
| H | -3.65329200 | -4.59978700 | 3.25077800  |
| C | 3.67965000  | -3.06772900 | -0.21884800 |
| C | 4.63556100  | -3.47525700 | 0.70614300  |
| C | 4.25158900  | -3.92689300 | 1.97437000  |
| C | 2.89316400  | -3.96904600 | 2.30938400  |
| C | 1.92552400  | -3.56417000 | 1.39408300  |
| C | 2.30169000  | -3.09813500 | 0.10837100  |
| H | 3.98348000  | -2.70296900 | -1.19396300 |
| H | 5.68766900  | -3.43287400 | 0.43874600  |
| H | 5.00202700  | -4.24191800 | 2.69352100  |
| H | 2.58596200  | -4.31799000 | 3.29161800  |
| H | 0.87509300  | -3.59631400 | 1.66295300  |



## SUPPORTING INFORMATION

|    |             |             |             |
|----|-------------|-------------|-------------|
| C  | 1.32764000  | -2.66308900 | -0.81911600 |
| C  | 0.46307400  | -2.04975600 | -1.47911500 |
| Br | -0.67043500 | -2.57835200 | -3.04172500 |

### INT2

B3LYP-D3/BSI SCF energy in acetonitrile: -2568.538136 a.u.

M06/BSII SCF energy in acetonitrile: -2567.449943 a.u.

M06/BSII free energy in acetonitrile: -2566.903438 a.u.

|    |             |             |             |
|----|-------------|-------------|-------------|
| Pd | 0.30335500  | -0.91807800 | 0.11746300  |
| P  | -2.09133100 | -0.69058800 | -0.04859400 |
| P  | 0.92331600  | 1.31722100  | -0.03538200 |
| Fe | -2.16350200 | 2.61761500  | 0.60189000  |
| C  | -0.49023800 | 3.81192800  | 0.62838400  |
| C  | -1.61908100 | 3.16977400  | 2.54224400  |
| C  | -1.38667000 | 4.25418500  | 1.64354000  |
| C  | -2.58958100 | 1.91918500  | -1.27443900 |
| C  | -4.18603200 | 2.82767600  | 0.12360100  |
| C  | -3.38170200 | 3.07598500  | -1.02757100 |
| H  | -0.15604200 | 4.39518900  | -0.21681300 |
| H  | -2.28776500 | 3.17895900  | 3.39273100  |
| H  | -1.84917500 | 5.23128200  | 1.69179900  |
| H  | -1.84581700 | 1.82222100  | -2.05003400 |
| H  | -4.86548400 | 3.52828700  | 0.59071900  |
| H  | -3.33893900 | 3.99918800  | -1.59019900 |
| C  | -0.86918600 | 2.04878500  | 2.08843600  |
| C  | -0.16791500 | 2.43355700  | 0.89141300  |
| C  | -3.90045700 | 1.51287200  | 0.59049800  |
| C  | -2.90214600 | 0.93363500  | -0.27180700 |
| H  | -0.85566900 | 1.06314700  | 2.53192200  |
| H  | -4.32388500 | 1.04891300  | 1.46867200  |
| C  | -2.71926900 | -1.67845800 | -1.47318800 |
| C  | -3.18803300 | -2.99093100 | -1.30615400 |
| C  | -2.64397100 | -1.14187900 | -2.76957100 |
| C  | -3.59022900 | -3.74230400 | -2.41227400 |
| H  | -3.23691200 | -3.43047100 | -0.31763600 |
| C  | -3.04111400 | -1.89912600 | -3.87329100 |
| H  | -2.27364900 | -0.13661300 | -2.93103100 |
| C  | -3.51684600 | -3.20101800 | -3.69797900 |
| H  | -3.95862400 | -4.75380700 | -2.26584000 |
| H  | -2.98032200 | -1.46750700 | -4.86837700 |
| H  | -3.82809000 | -3.78884100 | -4.55682200 |
| C  | 2.57978200  | 1.78174900  | 0.61414800  |
| C  | 2.73184000  | 2.04377100  | 1.98435400  |
| C  | 3.70138300  | 1.83916900  | -0.22672400 |
| C  | 3.98716600  | 2.37103800  | 2.50180400  |
| H  | 1.87665900  | 1.99700900  | 2.65140400  |
| C  | 4.95257100  | 2.17079800  | 0.29466200  |
| H  | 3.60549900  | 1.62270200  | -1.28528200 |
| C  | 5.09869200  | 2.43952000  | 1.65828400  |

## SUPPORTING INFORMATION

|    |             |             |             |
|----|-------------|-------------|-------------|
| H  | 4.09227500  | 2.57693400  | 3.56310800  |
| H  | 5.81380200  | 2.21185300  | -0.36557400 |
| H  | 6.07420300  | 2.69564100  | 2.06134600  |
| C  | 0.92048300  | 1.86701900  | -1.78154300 |
| C  | 1.34885500  | 3.15496200  | -2.14575300 |
| C  | 0.46562500  | 0.98598500  | -2.77476900 |
| C  | 1.28694800  | 3.56135700  | -3.47915800 |
| H  | 1.74283700  | 3.83482300  | -1.39738200 |
| C  | 0.40800500  | 1.39604000  | -4.10841900 |
| H  | 0.14681700  | -0.01584700 | -2.50325200 |
| C  | 0.81171600  | 2.68583400  | -4.46082100 |
| H  | 1.61583400  | 4.55991500  | -3.75147200 |
| H  | 0.04710300  | 0.70725700  | -4.86664900 |
| H  | 0.76608900  | 3.00612800  | -5.49764600 |
| C  | -2.94476800 | -1.33048700 | 1.44280400  |
| C  | -4.32047700 | -1.61484600 | 1.43097300  |
| C  | -2.22388600 | -1.47554600 | 2.63647400  |
| C  | -4.96067500 | -2.03922500 | 2.59601100  |
| H  | -4.89287000 | -1.50334100 | 0.51534900  |
| C  | -2.86881200 | -1.89078800 | 3.80355900  |
| H  | -1.15745800 | -1.27634200 | 2.65067300  |
| C  | -4.23650400 | -2.17536400 | 3.78429300  |
| H  | -6.02383700 | -2.26051700 | 2.57547100  |
| H  | -2.30086800 | -1.99827300 | 4.72323100  |
| H  | -4.73688000 | -2.50402600 | 4.69075300  |
| C  | 5.45933100  | -2.64690500 | -0.83272600 |
| C  | 6.83592900  | -2.86788800 | -0.82625800 |
| C  | 7.64596900  | -2.25890000 | 0.13760700  |
| C  | 7.06710000  | -1.42243300 | 1.09747700  |
| C  | 5.69221200  | -1.19281700 | 1.09604000  |
| C  | 4.86376000  | -1.80315700 | 0.12917600  |
| H  | 4.83263800  | -3.12306000 | -1.58135700 |
| H  | 7.27771800  | -3.51935800 | -1.57539600 |
| H  | 8.71797100  | -2.43454000 | 0.14039700  |
| H  | 7.68905400  | -0.94340600 | 1.84886200  |
| H  | 5.24661000  | -0.53468800 | 1.83479600  |
| C  | 3.45579400  | -1.55730100 | 0.12335200  |
| C  | 2.25330900  | -1.31138700 | 0.13519700  |
| Br | -0.10654600 | -3.46511700 | 0.38586900  |

### 2a

B3LYP-D3/BSI SCF energy in acetonitrile: -272.7556147 a.u.

M06/BSII SCF energy in acetonitrile: -272.5833188 a.u.

M06/BSII free energy in acetonitrile: -272.4589688 a.u.

|   |             |             |             |
|---|-------------|-------------|-------------|
| C | -1.28016500 | -0.67102100 | -0.50439500 |
| C | -0.08760200 | -1.12890500 | 0.32485100  |
| C | -0.08782200 | 1.12891100  | 0.32481600  |
| C | -1.28028000 | 0.67082400  | -0.50442900 |

## SUPPORTING INFORMATION

|   |             |             |             |
|---|-------------|-------------|-------------|
| H | -1.91802100 | -1.33013900 | -1.08546000 |
| H | -1.91830400 | 1.32983100  | -1.08544600 |
| C | -0.03400600 | 0.00002600  | 1.38172100  |
| H | 0.88957900  | 0.00009300  | 1.97244800  |
| H | -0.89840900 | -0.00009000 | 2.05359800  |
| C | 1.18780400  | -0.78061600 | -0.52076900 |
| H | 2.08531100  | -1.17638200 | -0.03365700 |
| H | 1.13821200  | -1.20810000 | -1.52632400 |
| C | 1.18769100  | 0.78075500  | -0.52077300 |
| H | 2.08505100  | 1.17665000  | -0.03344300 |
| H | 1.13817600  | 1.20823000  | -1.52630000 |
| H | -0.11748700 | -2.15786800 | 0.68933500  |
| H | -0.11783200 | 2.15793200  | 0.68912000  |

### INT3

B3LYP-D3/BSI SCF energy in acetonitrile: -2841.304316 a.u.

M06/BSII SCF energy in acetonitrile: -2840.03374 a.u.

M06/BSII free energy in acetonitrile: -2839.342408 a.u.

|    |             |             |             |
|----|-------------|-------------|-------------|
| Pd | -0.06358000 | 0.82342500  | 0.06649400  |
| P  | -1.02817900 | -1.32494700 | 0.20958100  |
| P  | 2.25040500  | 0.14842900  | 0.15280100  |
| Fe | 1.70129700  | -2.99158100 | -1.02840200 |
| C  | 3.60995800  | -2.23780900 | -0.93722500 |
| C  | 2.44492200  | -2.50560900 | -2.91656800 |
| C  | 3.48740100  | -3.04620400 | -2.10414600 |
| C  | 0.96328500  | -3.36424700 | 0.84871200  |
| C  | 0.73407700  | -4.83736800 | -0.91743000 |
| C  | 1.44589700  | -4.58297300 | 0.29357200  |
| H  | 4.28673200  | -2.42037300 | -0.11594000 |
| H  | 2.08605900  | -2.91884700 | -3.84997800 |
| H  | 4.05509500  | -3.94438000 | -2.30941100 |
| H  | 1.31798900  | -2.89074500 | 1.75221300  |
| H  | 0.89830500  | -5.66847100 | -1.59048800 |
| H  | 2.24945100  | -5.18410300 | 0.69834100  |
| C  | 1.91371700  | -1.36219100 | -2.25731100 |
| C  | 2.62475200  | -1.19128200 | -1.01752200 |
| C  | -0.19747600 | -3.77930500 | -1.11679900 |
| C  | -0.05956100 | -2.85157700 | -0.02449500 |
| H  | 1.11269400  | -0.72364200 | -2.60496200 |
| H  | -0.87005000 | -3.67010500 | -1.95512500 |
| C  | -1.77164000 | -1.62772900 | 1.86717000  |
| C  | -1.96841000 | -0.57929600 | 2.77886100  |
| C  | -2.09819500 | -2.93938500 | 2.25564800  |
| C  | -2.48626500 | -0.83517300 | 4.04968000  |
| H  | -1.71188900 | 0.43512800  | 2.49964500  |
| C  | -2.62676000 | -3.18948400 | 3.52273600  |
| H  | -1.93724700 | -3.76853000 | 1.57462700  |
| C  | -2.81923200 | -2.13910400 | 4.42365300  |
| H  | -2.62418100 | -0.01362800 | 4.74672300  |

## SUPPORTING INFORMATION

|    |             |             |             |
|----|-------------|-------------|-------------|
| H  | -2.87989100 | -4.20692800 | 3.80618400  |
| H  | -3.22110100 | -2.33703700 | 5.41320800  |
| C  | 3.56608500  | 1.36736200  | -0.26604500 |
| C  | 3.78339200  | 1.67649200  | -1.61955000 |
| C  | 4.30187900  | 2.04145100  | 0.71977700  |
| C  | 4.73006800  | 2.63797700  | -1.97574000 |
| H  | 3.19352900  | 1.19415700  | -2.39215600 |
| C  | 5.24598500  | 3.00504400  | 0.35689000  |
| H  | 4.14732100  | 1.81874100  | 1.76977700  |
| C  | 5.46283000  | 3.30505500  | -0.98971600 |
| H  | 4.89071000  | 2.86840900  | -3.02523900 |
| H  | 5.81110100  | 3.51837300  | 1.12962400  |
| H  | 6.19778000  | 4.05427800  | -1.26985300 |
| C  | 2.68464300  | -0.45273000 | 1.82925300  |
| C  | 3.97398300  | -0.91406500 | 2.14701100  |
| C  | 1.69198500  | -0.46507100 | 2.82119000  |
| C  | 4.24673900  | -1.41414800 | 3.42059400  |
| H  | 4.76852300  | -0.86980200 | 1.40951800  |
| C  | 1.96718700  | -0.96557800 | 4.09540600  |
| H  | 0.69870400  | -0.09325400 | 2.59582500  |
| C  | 3.24253700  | -1.44902000 | 4.39418700  |
| H  | 5.24514400  | -1.77235600 | 3.65403000  |
| H  | 1.18278300  | -0.97804900 | 4.84684200  |
| H  | 3.45893400  | -1.84183300 | 5.38347800  |
| C  | -2.32756500 | -1.55606100 | -1.07162500 |
| C  | -3.46653600 | -2.33804800 | -0.84031800 |
| C  | -2.11249800 | -0.99593600 | -2.34070200 |
| C  | -4.37944300 | -2.56527100 | -1.87356400 |
| H  | -3.65411500 | -2.76711800 | 0.13793400  |
| C  | -3.02268100 | -1.23759400 | -3.37103700 |
| H  | -1.25966300 | -0.34609800 | -2.52187600 |
| C  | -4.15614200 | -2.02387100 | -3.14148600 |
| H  | -5.26555300 | -3.16378100 | -1.68274500 |
| H  | -2.85041400 | -0.80019300 | -4.35055000 |
| H  | -4.86634500 | -2.20388800 | -3.94345000 |
| C  | -5.36849500 | 2.22037400  | 1.07149200  |
| C  | -6.76132900 | 2.27410600  | 1.03130100  |
| C  | -7.46315500 | 1.65906400  | -0.01037500 |
| C  | -6.76082400 | 0.98602100  | -1.01579000 |
| C  | -5.36906900 | 0.92529900  | -0.98351000 |
| C  | -4.65092600 | 1.54411400  | 0.06312800  |
| H  | -4.82506100 | 2.69775300  | 1.88180600  |
| H  | -7.30075400 | 2.79783800  | 1.81574600  |
| H  | -8.54822100 | 1.70314200  | -0.03790300 |
| H  | -7.29896800 | 0.50326000  | -1.82704200 |
| H  | -4.82350400 | 0.39942500  | -1.76045800 |
| C  | -3.22551800 | 1.45505300  | 0.09658400  |
| C  | -2.01121100 | 1.28861900  | 0.08384000  |
| Br | 0.37283000  | 1.88840000  | -3.38141300 |
| C  | 0.90883600  | 3.00492600  | 0.16484000  |

## SUPPORTING INFORMATION

|   |             |            |             |
|---|-------------|------------|-------------|
| C | 1.24079000  | 3.50173900 | 1.56748700  |
| C | -0.93021500 | 4.01942000 | 1.17480300  |
| C | -0.40918500 | 3.33264300 | -0.06730000 |
| H | 1.63085100  | 2.90980600 | -0.63493100 |
| H | -0.85117600 | 3.39993400 | -1.05407500 |
| C | -0.11423000 | 3.32493600 | 2.28656800  |
| H | -0.16185800 | 3.85548800 | 3.24247000  |
| H | -0.39301800 | 2.27753300 | 2.43287200  |
| C | 1.28179000  | 5.05934800 | 1.41608300  |
| H | 1.63268100  | 5.51515000 | 2.34705200  |
| H | 1.95557500  | 5.37353100 | 0.61385800  |
| C | -0.21157800 | 5.41784500 | 1.13530100  |
| H | -0.62599000 | 6.05491200 | 1.92227800  |
| H | -0.35796800 | 5.92965500 | 0.17991000  |
| H | 2.12112300  | 3.06598500 | 2.03739800  |
| H | -2.01321200 | 4.06345000 | 1.28318300  |

### TS2

B3LYP-D3/BSI SCF energy in acetonitrile: -2841.299613 a.u.

M06/BSII SCF energy in acetonitrile: -2840.028011 a.u.

M06/BSII free energy in acetonitrile: -2839.337373 a.u.

|    |             |             |             |
|----|-------------|-------------|-------------|
| Pd | 0.02221500  | 0.79693000  | 0.12047100  |
| P  | -1.01748600 | -1.34846400 | 0.09761000  |
| P  | 2.28364400  | 0.10566500  | 0.25239400  |
| Fe | 1.73522400  | -2.91635400 | -1.21032300 |
| C  | 3.65277700  | -2.20512700 | -0.98318800 |
| C  | 2.55868100  | -2.28112000 | -3.01902600 |
| C  | 3.56001600  | -2.90994300 | -2.21827600 |
| C  | 0.92023900  | -3.46675900 | 0.59304100  |
| C  | 0.75666300  | -4.75302900 | -1.31971700 |
| C  | 1.42498300  | -4.62507700 | -0.06430800 |
| H  | 4.29216200  | -2.47109900 | -0.15481700 |
| H  | 2.22820600  | -2.60750400 | -3.99637100 |
| H  | 4.11826800  | -3.80000400 | -2.47796600 |
| H  | 1.23966600  | -3.08677400 | 1.55246200  |
| H  | 0.94632300  | -5.51052300 | -2.06881900 |
| H  | 2.21447600  | -5.26597300 | 0.30567500  |
| C  | 2.02280900  | -1.18676300 | -2.28404900 |
| C  | 2.69395300  | -1.13288900 | -1.01165400 |
| C  | -0.17102700 | -3.67828100 | -1.44073600 |
| C  | -0.07486600 | -2.86931700 | -0.25682200 |
| H  | 1.24477000  | -0.50577900 | -2.60505100 |
| H  | -0.81343100 | -3.48033100 | -2.28694200 |
| C  | -1.80088100 | -1.75375000 | 1.71439900  |
| C  | -2.04549500 | -0.74064300 | 2.65509900  |
| C  | -2.12601300 | -3.08144900 | 2.04215000  |
| C  | -2.60630600 | -1.04797800 | 3.89611000  |
| H  | -1.79534900 | 0.28664800  | 2.41884600  |
| C  | -2.69150100 | -3.38442900 | 3.28188900  |

## SUPPORTING INFORMATION

|   |             |             |             |
|---|-------------|-------------|-------------|
| H | -1.93529300 | -3.88155000 | 1.33422800  |
| C | -2.93067300 | -2.36951600 | 4.21222500  |
| H | -2.78357000 | -0.25364100 | 4.61559000  |
| H | -2.93955300 | -4.41449400 | 3.52119200  |
| H | -3.36390800 | -2.60855300 | 5.17927500  |
| C | 3.55952600  | 1.40151700  | -0.02277600 |
| C | 3.72849500  | 1.89384200  | -1.32840900 |
| C | 4.29064500  | 1.97389300  | 1.02831000  |
| C | 4.62704400  | 2.93224000  | -1.57509800 |
| H | 3.13248500  | 1.49611700  | -2.14492300 |
| C | 5.18728800  | 3.01550700  | 0.77490200  |
| H | 4.16644900  | 1.61389700  | 2.04395100  |
| C | 5.35891000  | 3.49548400  | -0.52516500 |
| H | 4.74915300  | 3.30586300  | -2.58799800 |
| H | 5.74950200  | 3.44986700  | 1.59667000  |
| H | 6.05604200  | 4.30556600  | -0.71959200 |
| C | 2.67711000  | -0.63312400 | 1.88158200  |
| C | 3.95666000  | -1.12334200 | 2.19483100  |
| C | 1.65628800  | -0.72523300 | 2.84049100  |
| C | 4.19239500  | -1.73039100 | 3.42899500  |
| H | 4.77193600  | -1.01945900 | 1.48635400  |
| C | 1.89455300  | -1.33330600 | 4.07476500  |
| H | 0.67033100  | -0.33247000 | 2.61736600  |
| C | 3.16075900  | -1.84448900 | 4.36711400  |
| H | 5.18334400  | -2.11053100 | 3.65968600  |
| H | 1.08944500  | -1.40658600 | 4.80040500  |
| H | 3.34836200  | -2.32183000 | 5.32464800  |
| C | -2.33563500 | -1.43928500 | -1.18308600 |
| C | -3.51519600 | -2.17360800 | -0.99878100 |
| C | -2.10791900 | -0.78819000 | -2.40615100 |
| C | -4.45366600 | -2.26264600 | -2.03014500 |
| H | -3.71273900 | -2.67288800 | -0.05599600 |
| C | -3.04411000 | -0.89109500 | -3.43676900 |
| H | -1.22217300 | -0.17374800 | -2.55052900 |
| C | -4.21797900 | -1.62805100 | -3.25200800 |
| H | -5.36947100 | -2.82570700 | -1.87430600 |
| H | -2.86054700 | -0.38250500 | -4.37922900 |
| H | -4.94958500 | -1.69822900 | -4.05203400 |
| C | -5.21170900 | 1.83013000  | 1.39988400  |
| C | -6.60199400 | 1.74815500  | 1.44542600  |
| C | -7.32604500 | 1.38602500  | 0.30444100  |
| C | -6.65005300 | 1.10300300  | -0.88739100 |
| C | -5.26060600 | 1.18260400  | -0.94458700 |
| C | -4.52077900 | 1.54840200  | 0.20139500  |
| H | -4.64702100 | 2.10598700  | 2.28558700  |
| H | -7.12296700 | 1.96577000  | 2.37367200  |
| H | -8.40969200 | 1.32252400  | 0.34457800  |
| H | -7.20748900 | 0.81583100  | -1.77464500 |
| H | -4.73253600 | 0.95042500  | -1.86386500 |
| C | -3.09911000 | 1.59268200  | 0.15356800  |

## SUPPORTING INFORMATION

|    |             |            |             |
|----|-------------|------------|-------------|
| C  | -1.87155400 | 1.54569800 | 0.11156200  |
| Br | 0.38873900  | 2.07052700 | -3.38248100 |
| C  | 0.71134600  | 2.86270600 | 0.22732500  |
| C  | 1.08421300  | 3.39088600 | 1.61351500  |
| C  | -1.06219200 | 4.02719600 | 1.24715300  |
| C  | -0.63873300 | 3.25840800 | 0.01550000  |
| H  | 1.40489700  | 2.91455200 | -0.60559800 |
| H  | -1.00492800 | 3.47555100 | -0.98153800 |
| C  | -0.26658000 | 3.31347800 | 2.36028700  |
| H  | -0.26485900 | 3.87306700 | 3.30061200  |
| H  | -0.60959600 | 2.29188100 | 2.54656500  |
| C  | 1.21922800  | 4.93194200 | 1.41892900  |
| H  | 1.59392500  | 5.39713900 | 2.33647800  |
| H  | 1.91061700  | 5.18194000 | 0.60890000  |
| C  | -0.25021200 | 5.36612000 | 1.12277100  |
| H  | -0.62098900 | 6.07255100 | 1.87100900  |
| H  | -0.37081000 | 5.83050800 | 0.13959600  |
| H  | 1.94383200  | 2.91452700 | 2.08406400  |
| H  | -2.13614100 | 4.15341900 | 1.37921200  |

### TS2<sup>†</sup>

B3LYP-D3/BSI SCF energy in acetonitrile: -2827.731429 a.u.

M06/BSII SCF energy in acetonitrile: -2826.494492 a.u.

M06/BSII free energy in acetonitrile: -2825.798484 a.u.

|    |             |             |             |
|----|-------------|-------------|-------------|
| Pd | 0.01660700  | 0.90777000  | -0.31960200 |
| P  | -0.94018000 | -1.22961900 | 0.17113700  |
| P  | 2.30511500  | 0.31622700  | -0.14464000 |
| Fe | 1.79394200  | -2.94256900 | -0.93745600 |
| C  | 3.68954200  | -2.14029500 | -1.03147800 |
| C  | 2.43392400  | -2.65980000 | -2.90360000 |
| C  | 3.53013700  | -3.07937400 | -2.09081300 |
| C  | 1.12190300  | -3.11527400 | 0.99713200  |
| C  | 0.92029500  | -4.79980900 | -0.57053400 |
| C  | 1.65282300  | -4.36698000 | 0.57563900  |
| H  | 4.41095000  | -2.21096900 | -0.23093800 |
| H  | 2.03793000  | -3.18754800 | -3.76103000 |
| H  | 4.11020900  | -3.98322300 | -2.22319600 |
| H  | 1.47746300  | -2.52004400 | 1.82461400  |
| H  | 1.10909200  | -5.69581200 | -1.14704600 |
| H  | 2.49865000  | -4.87390900 | 1.02093600  |
| C  | 1.90640700  | -1.46024100 | -2.34929400 |
| C  | 2.67629900  | -1.12988200 | -1.17748000 |
| C  | -0.07294500 | -3.82026500 | -0.85950000 |
| C  | 0.04700800  | -2.76255800 | 0.10790300  |
| H  | 1.04850300  | -0.90883300 | -2.70776000 |
| H  | -0.77202300 | -3.84493600 | -1.68303100 |
| C  | -1.64741800 | -1.28171100 | 1.86847800  |
| C  | -1.92380600 | -0.08863900 | 2.55499500  |
| C  | -1.89134800 | -2.51024100 | 2.50623000  |

## SUPPORTING INFORMATION

|   |             |             |             |
|---|-------------|-------------|-------------|
| C | -2.43583700 | -0.12380300 | 3.85300600  |
| H | -1.73750400 | 0.86651800  | 2.07857300  |
| C | -2.40730900 | -2.54089500 | 3.80282100  |
| H | -1.67749600 | -3.44332400 | 1.99504900  |
| C | -2.67796200 | -1.34868900 | 4.47958700  |
| H | -2.63964600 | 0.80701200  | 4.37458500  |
| H | -2.59218400 | -3.49660700 | 4.28471900  |
| H | -3.07192400 | -1.37465700 | 5.49147900  |
| C | 3.54671900  | 1.54844400  | -0.71040300 |
| C | 3.76527100  | 1.70587400  | -2.08941200 |
| C | 4.21199600  | 2.39340900  | 0.18992000  |
| C | 4.63476500  | 2.69231600  | -2.55648400 |
| H | 3.25777100  | 1.06033100  | -2.80044800 |
| C | 5.08043400  | 3.38058200  | -0.28239100 |
| H | 4.05794300  | 2.28545600  | 1.25834900  |
| C | 5.29210600  | 3.53397000  | -1.65407900 |
| H | 4.79920600  | 2.80161600  | -3.62460900 |
| H | 5.59069300  | 4.02777100  | 0.42514200  |
| H | 5.96746500  | 4.30238200  | -2.01892900 |
| C | 2.77425900  | -0.07584800 | 1.57997300  |
| C | 4.07407200  | -0.48104300 | 1.92771700  |
| C | 1.79575800  | 0.02695700  | 2.58069600  |
| C | 4.37068200  | -0.81926900 | 3.24839800  |
| H | 4.85675700  | -0.51842000 | 1.17703600  |
| C | 2.09607700  | -0.31094000 | 3.90177800  |
| H | 0.79559200  | 0.35815900  | 2.32394600  |
| C | 3.38131000  | -0.74351800 | 4.23492500  |
| H | 5.37618000  | -1.13672900 | 3.50870800  |
| H | 1.32419200  | -0.23816100 | 4.66260600  |
| H | 3.61721400  | -1.01102000 | 5.26086500  |
| C | -2.30388800 | -1.64040500 | -0.99343000 |
| C | -3.46492200 | -2.30864300 | -0.58346400 |
| C | -2.13014000 | -1.32889700 | -2.35123800 |
| C | -4.43653600 | -2.66539400 | -1.52243400 |
| H | -3.61981600 | -2.55107800 | 0.46255500  |
| C | -3.09593900 | -1.69877200 | -3.28797200 |
| H | -1.24675500 | -0.78615300 | -2.67343900 |
| C | -4.25196000 | -2.36864800 | -2.87436400 |
| H | -5.33738400 | -3.17527700 | -1.19352000 |
| H | -2.95069700 | -1.45458900 | -4.33638600 |
| H | -5.00835800 | -2.64905000 | -3.60159100 |
| C | -5.24835300 | 2.16076700  | 0.67879300  |
| C | -6.63884500 | 2.09245300  | 0.73609500  |
| C | -7.35599300 | 1.43677300  | -0.27037200 |
| C | -6.67382800 | 0.84621800  | -1.33957900 |
| C | -5.28419500 | 0.91004900  | -1.40834100 |
| C | -4.55180900 | 1.56967700  | -0.39740300 |
| H | -4.68932800 | 2.66564100  | 1.46108700  |
| H | -7.16492000 | 2.55043000  | 1.56888400  |
| H | -8.43977500 | 1.38445900  | -0.22033700 |



## SUPPORTING INFORMATION

|   |             |            |             |
|---|-------------|------------|-------------|
| H | -7.22596400 | 0.33048200 | -2.12019100 |
| H | -4.75136800 | 0.44126400 | -2.22907700 |
| C | -3.13011500 | 1.60460100 | -0.45061900 |
| C | -1.90160900 | 1.56922300 | -0.48205400 |
| C | 0.62598100  | 2.96138400 | -0.73667700 |
| C | 1.02492700  | 3.79205300 | 0.48689400  |
| C | -1.15368000 | 4.27463200 | 0.07897900  |
| C | -0.74199200 | 3.27611700 | -0.97800200 |
| H | 1.30730500  | 2.85725300 | -1.57749000 |
| H | -1.16613900 | 3.28825500 | -1.97542400 |
| C | -0.29678000 | 3.83841400 | 1.28537700  |
| H | -0.28328600 | 4.58796100 | 2.08190000  |
| H | -0.59614700 | 2.87167400 | 1.69957600  |
| C | 1.09906900  | 5.25692900 | -0.03895100 |
| H | 1.48876100  | 5.91693300 | 0.74263700  |
| H | 1.75336600  | 5.34594000 | -0.91088900 |
| C | -0.39338700 | 5.57817500 | -0.36013000 |
| H | -0.76499100 | 6.41476800 | 0.23831100  |
| H | -0.56472600 | 5.82145500 | -1.41274000 |
| H | 1.91448100  | 3.45413700 | 1.01522400  |
| H | -2.22671800 | 4.39556400 | 0.22034000  |

### Br<sup>-</sup>

B3LYP-D3/BSI SCF energy in acetonitrile: -13.55754918 a.u.

M06/BSII SCF energy in acetonitrile: -13.51974309 a.u.

M06/BSII free energy in acetonitrile: -13.53591909 a.u.

|    |            |            |            |
|----|------------|------------|------------|
| Br | 0.00000000 | 0.00000000 | 0.00000000 |
|----|------------|------------|------------|

### INT4

B3LYP-D3/BSI SCF energy in acetonitrile: -2681.860166 a.u.

M06/BSII SCF energy in acetonitrile: -2680.736829 a.u.

M06/BSII free energy in acetonitrile: -2680.190317 a.u.

|    |             |             |             |
|----|-------------|-------------|-------------|
| Pd | -0.32272700 | -0.84050100 | 0.39112600  |
| P  | 2.08365100  | -0.60068600 | 0.62245000  |
| P  | -0.76738100 | 1.36694900  | -0.35964700 |
| Fe | 2.24289000  | 1.67277300  | -1.90298000 |
| C  | 0.69193700  | 2.93385600  | -2.37714200 |
| C  | 1.41778100  | 1.23971100  | -3.77396300 |
| C  | 1.43317300  | 2.65109400  | -3.55964600 |
| C  | 2.98425500  | 2.09558700  | -0.03854200 |
| C  | 4.32874000  | 1.70621000  | -1.87823300 |
| C  | 3.80807700  | 2.71949600  | -1.01790000 |
| H  | 0.55882100  | 3.90978400  | -1.93466400 |
| H  | 1.92789100  | 0.71159000  | -4.56858900 |
| H  | 1.96240600  | 3.38088100  | -4.15818200 |
| H  | 2.42994500  | 2.59289900  | 0.74348200  |
| H  | 4.95481600  | 1.86717600  | -2.74577300 |
| H  | 3.96864100  | 3.78474700  | -1.11840900 |

## SUPPORTING INFORMATION

|   |             |             |             |
|---|-------------|-------------|-------------|
| C | 0.66848100  | 0.63535700  | -2.72720000 |
| C | 0.21824600  | 1.68256000  | -1.84534900 |
| C | 3.83807100  | 0.44637300  | -1.43143800 |
| C | 3.00088600  | 0.67727500  | -0.28556500 |
| H | 0.47126000  | -0.42292100 | -2.59995200 |
| H | 4.02965300  | -0.51401800 | -1.88891400 |
| C | 2.45121200  | -0.28278900 | 2.39449400  |
| C | 1.60774700  | -0.82681200 | 3.37901600  |
| C | 3.56185300  | 0.48004500  | 2.78805500  |
| C | 1.86713000  | -0.60056900 | 4.73095900  |
| H | 0.73853100  | -1.41333000 | 3.09784600  |
| C | 3.81594600  | 0.70413500  | 4.14282400  |
| H | 4.22911000  | 0.90170000  | 2.04482700  |
| C | 2.96861800  | 0.16915400  | 5.11554100  |
| H | 1.20371000  | -1.01969800 | 5.48173200  |
| H | 4.67648900  | 1.29899700  | 4.43454400  |
| H | 3.16496800  | 0.35074300  | 6.16819800  |
| C | -2.48375800 | 1.73205000  | -0.88847700 |
| C | -2.88403100 | 1.45216500  | -2.20317000 |
| C | -3.41159000 | 2.25723500  | 0.02391300  |
| C | -4.19791300 | 1.70735100  | -2.60206300 |
| H | -2.17740000 | 1.04038400  | -2.91669500 |
| C | -4.72279500 | 2.50921500  | -0.38066800 |
| H | -3.11517000 | 2.47149900  | 1.04571800  |
| C | -5.11767000 | 2.23748100  | -1.69378300 |
| H | -4.49896500 | 1.49370000  | -3.62348500 |
| H | -5.43518900 | 2.91579200  | 0.33102400  |
| H | -6.13922900 | 2.43430300  | -2.00580700 |
| C | -0.38388900 | 2.63767700  | 0.89451000  |
| C | -0.53599800 | 4.00564400  | 0.60883000  |
| C | 0.06535200  | 2.24203900  | 2.16176900  |
| C | -0.18506800 | 4.95880300  | 1.56427300  |
| H | -0.93900300 | 4.32679100  | -0.34576700 |
| C | 0.41377500  | 3.20000900  | 3.11638600  |
| H | 0.14609000  | 1.18956600  | 2.40298400  |
| C | 0.30102100  | 4.55819400  | 2.81398800  |
| H | -0.29644800 | 6.01447100  | 1.33499400  |
| H | 0.77212400  | 2.87958900  | 4.09010900  |
| H | 0.57657300  | 5.30494800  | 3.55294000  |
| C | 3.01627000  | -2.12410300 | 0.20036700  |
| C | 4.18973000  | -2.46586400 | 0.89149500  |
| C | 2.58405500  | -2.91403200 | -0.87463100 |
| C | 4.91765800  | -3.59376800 | 0.51156200  |
| H | 4.53684900  | -1.85977100 | 1.72196400  |
| C | 3.32274900  | -4.03831700 | -1.25245600 |
| H | 1.67106800  | -2.67305400 | -1.41385900 |
| C | 4.48690300  | -4.38059800 | -0.56132400 |
| H | 5.82085500  | -3.85713500 | 1.05442900  |
| H | 2.98120900  | -4.64732900 | -2.08468400 |
| H | 5.05611400  | -5.25855600 | -0.85335500 |

## SUPPORTING INFORMATION

|    |             |             |             |
|----|-------------|-------------|-------------|
| C  | -5.40145700 | -1.88687700 | 2.28185800  |
| C  | -6.77638600 | -1.99369200 | 2.48629300  |
| C  | -7.67248600 | -1.56717000 | 1.50094500  |
| C  | -7.18410500 | -1.03224500 | 0.30459100  |
| C  | -5.81123900 | -0.91966200 | 0.09174300  |
| C  | -4.89898400 | -1.34577200 | 1.08048400  |
| H  | -4.70636100 | -2.21787100 | 3.04798400  |
| H  | -7.14964700 | -2.41062500 | 3.41756700  |
| H  | -8.74308700 | -1.65106500 | 1.66463300  |
| H  | -7.87450100 | -0.69826900 | -0.46501400 |
| H  | -5.43120800 | -0.49870000 | -0.83313300 |
| C  | -3.49131300 | -1.21400700 | 0.86464400  |
| C  | -2.29981100 | -1.04201300 | 0.63673100  |
| Br | -0.73641900 | -3.00295400 | -2.55904500 |
| C  | -0.24189900 | -2.75722300 | 0.82565900  |
| O  | -0.29570500 | -3.85825600 | 1.11440500  |

### TS3

B3LYP-D3/BSI SCF energy in acetonitrile: -2681.842133 a.u.

M06/BSII SCF energy in acetonitrile: -2680.720258 a.u.

M06/BSII free energy in acetonitrile: -2680.176375 a.u.

|    |             |             |             |
|----|-------------|-------------|-------------|
| Pd | -0.28494900 | -0.82522600 | 0.32059300  |
| P  | 2.06566800  | -0.79148600 | 0.58607100  |
| P  | -0.64592600 | 1.44041600  | -0.33027900 |
| Fe | 2.40687200  | 1.75077400  | -1.74692900 |
| C  | 0.97455600  | 3.20754900  | -2.02315800 |
| C  | 1.62261600  | 1.72967100  | -3.67941000 |
| C  | 1.74613000  | 3.07411500  | -3.21327900 |
| C  | 3.19519400  | 1.86395100  | 0.14764600  |
| C  | 4.47697500  | 1.53401700  | -1.74730700 |
| C  | 4.07978900  | 2.49794200  | -0.77155700 |
| H  | 0.90105500  | 4.09339900  | -1.40913400 |
| H  | 2.12367900  | 1.30758900  | -4.54066900 |
| H  | 2.36167800  | 3.84687100  | -3.65480600 |
| H  | 2.70708300  | 2.32990000  | 0.99121300  |
| H  | 5.11121100  | 1.71908000  | -2.60414800 |
| H  | 4.35908300  | 3.54330700  | -0.75800800 |
| C  | 0.77946900  | 1.01925500  | -2.77929900 |
| C  | 0.37067200  | 1.93331700  | -1.74455900 |
| C  | 3.84864200  | 0.29530900  | -1.43006400 |
| C  | 3.05546300  | 0.48777500  | -0.24914700 |
| H  | 0.49401200  | -0.02483900 | -2.83877800 |
| H  | 3.92998300  | -0.62714600 | -1.98801600 |
| C  | 2.47770700  | -0.58756100 | 2.36789400  |
| C  | 1.56206300  | -1.04216700 | 3.33201500  |
| C  | 3.67661800  | 0.00943000  | 2.79016300  |
| C  | 1.83808800  | -0.89552900 | 4.69211100  |
| H  | 0.62603200  | -1.49611100 | 3.02066900  |
| C  | 3.94732300  | 0.15610900  | 4.15201200  |

## SUPPORTING INFORMATION

|   |             |             |             |
|---|-------------|-------------|-------------|
| H | 4.39755400  | 0.36608300  | 2.06284700  |
| C | 3.02893800  | -0.29175000 | 5.10465100  |
| H | 1.11881800  | -1.24558900 | 5.42681500  |
| H | 4.87602200  | 0.62350900  | 4.46626200  |
| H | 3.23954100  | -0.16938800 | 6.16318000  |
| C | -2.38330800 | 1.71514700  | -0.85078400 |
| C | -2.75458200 | 1.62322200  | -2.19943500 |
| C | -3.37369500 | 1.89326800  | 0.12901800  |
| C | -4.10080400 | 1.71655600  | -2.56208200 |
| H | -2.00153600 | 1.47360100  | -2.96626200 |
| C | -4.71652600 | 1.98195800  | -0.23815900 |
| H | -3.09917300 | 1.95617200  | 1.17797800  |
| C | -5.08301200 | 1.89188100  | -1.58437300 |
| H | -4.37958100 | 1.64960100  | -3.60992600 |
| H | -5.47605900 | 2.10834900  | 0.52789400  |
| H | -6.12954600 | 1.95435000  | -1.86837300 |
| C | -0.35212300 | 2.69066200  | 0.97312300  |
| C | -0.71714900 | 4.03427200  | 0.78153800  |
| C | 0.24836400  | 2.30533600  | 2.18005600  |
| C | -0.45353800 | 4.97859600  | 1.77410500  |
| H | -1.20948900 | 4.34125200  | -0.13632400 |
| C | 0.51145300  | 3.25342700  | 3.17165400  |
| H | 0.51485800  | 1.26880000  | 2.34715900  |
| C | 0.16589000  | 4.59101000  | 2.96745800  |
| H | -0.73461200 | 6.01599300  | 1.61754400  |
| H | 0.98345100  | 2.94133500  | 4.09886100  |
| H | 0.36884500  | 5.32950800  | 3.73765000  |
| C | 2.88672700  | -2.34907400 | 0.06410400  |
| C | 4.13367800  | -2.72281900 | 0.59267600  |
| C | 2.27581100  | -3.15000200 | -0.91122300 |
| C | 4.75735200  | -3.88941400 | 0.15041900  |
| H | 4.61730100  | -2.11233600 | 1.34885000  |
| C | 2.91019800  | -4.31458700 | -1.35307700 |
| H | 1.31322500  | -2.87129500 | -1.33358400 |
| C | 4.14723800  | -4.68695100 | -0.82368200 |
| H | 5.71878900  | -4.17598900 | 0.56694400  |
| H | 2.43110100  | -4.93081000 | -2.10896900 |
| H | 4.63539000  | -5.59545600 | -1.16494300 |
| C | -5.38560400 | -1.18651800 | 2.32092800  |
| C | -6.76718600 | -1.10738900 | 2.47477100  |
| C | -7.60805900 | -1.25371300 | 1.36617000  |
| C | -7.06530100 | -1.48108800 | 0.09679900  |
| C | -5.68572000 | -1.56189300 | -0.07035000 |
| C | -4.83092400 | -1.41537900 | 1.04369100  |
| H | -4.72627300 | -1.06765700 | 3.17508700  |
| H | -7.19005800 | -0.92940900 | 3.45900200  |
| H | -8.68498500 | -1.18904800 | 1.49127600  |
| H | -7.71876000 | -1.59105500 | -0.76340300 |
| H | -5.25542000 | -1.72489700 | -1.05318200 |
| C | -3.42281900 | -1.44694600 | 0.86562400  |

## SUPPORTING INFORMATION

|    |             |             |             |
|----|-------------|-------------|-------------|
| C  | -2.20913400 | -1.42862900 | 0.66538100  |
| Br | -0.95547400 | -2.37361700 | -2.74184600 |
| C  | -0.83733900 | -2.59880000 | 0.83638400  |
| O  | -0.92119500 | -3.72201900 | 1.13290700  |

### INT5

B3LYP-D3/BSI SCF energy in acetonitrile: -2681.867464 a.u.

M06/BSII SCF energy in acetonitrile: -2680.75241 a.u.

M06/BSII free energy in acetonitrile: -2680.205601 a.u.

|    |             |             |             |
|----|-------------|-------------|-------------|
| Pd | 0.00654000  | 0.44813500  | -1.12772700 |
| P  | -1.95750100 | 0.78365300  | 0.08057200  |
| P  | 1.01067000  | -1.32968300 | 0.18215300  |
| Fe | -1.97877800 | -2.61003000 | 0.92534100  |
| C  | -0.29871100 | -3.77045200 | 1.23107500  |
| C  | -1.81443900 | -4.14752400 | -0.47530200 |
| C  | -1.37459100 | -4.60200700 | 0.80532100  |
| C  | -2.11269900 | -1.08914500 | 2.30742400  |
| C  | -3.89347800 | -2.43735000 | 1.72079300  |
| C  | -2.91605000 | -2.18600800 | 2.73029000  |
| H  | 0.21592400  | -3.83826400 | 2.17856600  |
| H  | -2.64333500 | -4.54961900 | -1.04264600 |
| H  | -1.81351700 | -5.40788800 | 1.37900700  |
| H  | -1.27455400 | -0.66998200 | 2.84321400  |
| H  | -4.62640600 | -3.23343000 | 1.72611000  |
| H  | -2.77191800 | -2.76028700 | 3.63606200  |
| C  | -1.01667300 | -3.02940500 | -0.84517000 |
| C  | -0.06827900 | -2.78390900 | 0.21241000  |
| C  | -3.70435100 | -1.48971800 | 0.67356900  |
| C  | -2.59942800 | -0.64306500 | 1.02910500  |
| H  | -1.11680400 | -2.43193400 | -1.74163500 |
| H  | -4.27588400 | -1.42920000 | -0.24152500 |
| C  | -1.98733200 | 2.12996500  | 1.33072500  |
| C  | -1.01856700 | 3.14378800  | 1.27928100  |
| C  | -2.95149700 | 2.15488400  | 2.35315600  |
| C  | -1.01118400 | 4.16397600  | 2.23298900  |
| H  | -0.25605200 | 3.13098600  | 0.50948900  |
| C  | -2.94187500 | 3.17657100  | 3.30381400  |
| H  | -3.70805300 | 1.37876500  | 2.40972500  |
| C  | -1.97088400 | 4.18077800  | 3.24768400  |
| H  | -0.25002400 | 4.93748800  | 2.18544200  |
| H  | -3.69159200 | 3.18542600  | 4.08981500  |
| H  | -1.96140800 | 4.97006400  | 3.99397700  |
| C  | 2.65207800  | -1.90890200 | -0.39840100 |
| C  | 2.88751700  | -3.21495800 | -0.84200200 |
| C  | 3.70105800  | -0.97395500 | -0.40901000 |
| C  | 4.16026900  | -3.58305200 | -1.29079500 |
| H  | 2.08549400  | -3.94718800 | -0.83860000 |
| C  | 4.96892300  | -1.34470400 | -0.85294600 |
| H  | 3.52857000  | 0.04472800  | -0.07207500 |

## SUPPORTING INFORMATION

|    |             |             |             |
|----|-------------|-------------|-------------|
| C  | 5.20125200  | -2.65166400 | -1.29710600 |
| H  | 4.33667400  | -4.59997900 | -1.63046100 |
| H  | 5.77165900  | -0.61252400 | -0.85581300 |
| H  | 6.18911300  | -2.94153800 | -1.64403300 |
| C  | 1.38802300  | -0.89171300 | 1.92800500  |
| C  | 2.00539400  | -1.80258500 | 2.80207400  |
| C  | 1.10255600  | 0.40315600  | 2.38148200  |
| C  | 2.28556700  | -1.43265500 | 4.11815300  |
| H  | 2.27699000  | -2.79448600 | 2.45330400  |
| C  | 1.38842000  | 0.77506600  | 3.69756500  |
| H  | 0.65536800  | 1.12152500  | 1.70605300  |
| C  | 1.97185200  | -0.14541700 | 4.57002700  |
| H  | 2.75499100  | -2.14601800 | 4.78955400  |
| H  | 1.15554900  | 1.78186800  | 4.03286100  |
| H  | 2.19386500  | 0.13898500  | 5.59464700  |
| C  | -3.34358600 | 1.11591800  | -1.08053200 |
| C  | -4.32318100 | 2.08923400  | -0.84538400 |
| C  | -3.41327700 | 0.33188600  | -2.24408700 |
| C  | -5.36366800 | 2.26941500  | -1.76131900 |
| H  | -4.28196300 | 2.70874200  | 0.04441500  |
| C  | -4.46175600 | 0.50377700  | -3.14709400 |
| H  | -2.64059300 | -0.40542100 | -2.44409600 |
| C  | -5.43811100 | 1.47628700  | -2.90845600 |
| H  | -6.11665000 | 3.02971600  | -1.57427500 |
| H  | -4.50907000 | -0.11113900 | -4.04135400 |
| H  | -6.24929800 | 1.61809600  | -3.61681100 |
| C  | 3.22391200  | 2.94093300  | 1.03946000  |
| C  | 4.39274500  | 2.83757300  | 1.78848800  |
| C  | 5.62554500  | 2.66172500  | 1.15069100  |
| C  | 5.68942300  | 2.59692100  | -0.24521900 |
| C  | 4.52804300  | 2.69944900  | -1.00839800 |
| C  | 3.28296700  | 2.86643300  | -0.36897600 |
| H  | 2.26293700  | 3.06200300  | 1.52833000  |
| H  | 4.33991700  | 2.88388000  | 2.87220600  |
| H  | 6.53388400  | 2.57498000  | 1.73953400  |
| H  | 6.64591100  | 2.46169300  | -0.74127500 |
| H  | 4.57034100  | 2.63656000  | -2.09099900 |
| C  | 2.07273500  | 2.85404200  | -1.11326700 |
| C  | 1.00031000  | 2.76594500  | -1.69981400 |
| Br | 1.12584700  | -0.42382100 | -3.38167400 |
| C  | -0.26464900 | 2.18582100  | -2.11982100 |
| O  | -1.10334800 | 2.66400200  | -2.84816400 |

### INT6

B3LYP-D3/BSI SCF energy in acetonitrile: -2954.634492 a.u.

M06/BSII SCF energy in acetonitrile: -2953.339426 a.u.

M06/BSII free energy in acetonitrile: -2952.640686 a.u.

|    |             |             |            |
|----|-------------|-------------|------------|
| Pd | 0.00295000  | 0.44461800  | 0.83286100 |
| P  | -0.35776100 | -1.86890000 | 0.34963300 |

## SUPPORTING INFORMATION

|    |             |             |             |
|----|-------------|-------------|-------------|
| P  | 2.08126800  | 0.72138600  | -0.51588200 |
| Fe | 1.37686200  | -1.83578600 | -2.63757000 |
| C  | 2.85163000  | -0.48539500 | -3.11155100 |
| C  | 0.78849400  | -0.52702200 | -4.15520200 |
| C  | 2.16854800  | -0.86305100 | -4.30397500 |
| C  | 1.91169200  | -3.01658700 | -1.04534500 |
| C  | 0.98019000  | -3.85568300 | -2.98366300 |
| C  | 2.19696400  | -3.71384600 | -2.25220700 |
| H  | 3.89920000  | -0.65175700 | -2.90959200 |
| H  | 0.00481700  | -0.72133800 | -4.87563400 |
| H  | 2.61555300  | -1.36122000 | -5.15452000 |
| H  | 2.62746500  | -2.74023200 | -0.28656100 |
| H  | 0.87117000  | -4.31094900 | -3.95921000 |
| H  | 3.17792700  | -4.03621700 | -2.57606500 |
| C  | 0.60977300  | 0.05754500  | -2.87053700 |
| C  | 1.88545000  | 0.07942300  | -2.20634300 |
| C  | -0.06620400 | -3.25162400 | -2.22954000 |
| C  | 0.50488800  | -2.71380400 | -1.02272500 |
| H  | -0.31088500 | 0.43698400  | -2.44730100 |
| H  | -1.10113300 | -3.18328200 | -2.52877100 |
| C  | 0.06274600  | -2.99912900 | 1.73980600  |
| C  | 0.49022200  | -2.50393400 | 2.97897300  |
| C  | 0.00396400  | -4.38999200 | 1.53820500  |
| C  | 0.86165400  | -3.38455400 | 3.99847100  |
| H  | 0.52040200  | -1.43692600 | 3.15614000  |
| C  | 0.36755900  | -5.26553200 | 2.56058200  |
| H  | -0.32592100 | -4.78876200 | 0.58355500  |
| C  | 0.80206400  | -4.76382100 | 3.79178100  |
| H  | 1.19711000  | -2.98857600 | 4.95275400  |
| H  | 0.31727300  | -6.33760800 | 2.39375700  |
| H  | 1.09281300  | -5.44666400 | 4.58499000  |
| C  | 2.79702700  | 2.38900300  | -0.85148000 |
| C  | 2.20638900  | 3.19075200  | -1.84292500 |
| C  | 3.87089600  | 2.90263800  | -0.10765100 |
| C  | 2.69058800  | 4.47693200  | -2.08784200 |
| H  | 1.35000100  | 2.82719500  | -2.40085400 |
| C  | 4.34903000  | 4.19175600  | -0.35439600 |
| H  | 4.34364500  | 2.30075200  | 0.66073400  |
| C  | 3.76143900  | 4.98185200  | -1.34501400 |
| H  | 2.22585700  | 5.08573300  | -2.85859100 |
| H  | 5.18285100  | 4.57410900  | 0.22762200  |
| H  | 4.13484900  | 5.98378800  | -1.53702400 |
| C  | 3.47225000  | -0.19886400 | 0.25145700  |
| C  | 4.75203300  | -0.26629500 | -0.32588200 |
| C  | 3.23640400  | -0.86642800 | 1.46166200  |
| C  | 5.75591400  | -1.02379000 | 0.27835900  |
| H  | 4.97314000  | 0.28483400  | -1.23363300 |
| C  | 4.24154400  | -1.62350600 | 2.06730100  |
| H  | 2.25675500  | -0.80321600 | 1.91923500  |
| C  | 5.50090500  | -1.71043800 | 1.47084900  |

## SUPPORTING INFORMATION

|    |             |             |             |
|----|-------------|-------------|-------------|
| H  | 6.73965300  | -1.07417200 | -0.17941100 |
| H  | 4.03448700  | -2.14566400 | 2.99710000  |
| H  | 6.28509400  | -2.30116400 | 1.93558200  |
| C  | -2.11902900 | -2.19307200 | -0.06109800 |
| C  | -2.95247000 | -2.96800500 | 0.75500600  |
| C  | -2.65398800 | -1.57514500 | -1.20501800 |
| C  | -4.29984900 | -3.13557100 | 0.42167300  |
| H  | -2.56277900 | -3.43541000 | 1.65282400  |
| C  | -3.99296400 | -1.76045400 | -1.54276200 |
| H  | -2.02742700 | -0.94206800 | -1.82473400 |
| C  | -4.82089900 | -2.53884500 | -0.72730400 |
| H  | -4.93938400 | -3.73353900 | 1.06461200  |
| H  | -4.39624700 | -1.27698400 | -2.42745100 |
| H  | -5.86923700 | -2.66580000 | -0.98098700 |
| C  | -6.39898600 | 0.56283700  | 0.67042300  |
| C  | -7.56510400 | 0.77966400  | -0.05915500 |
| C  | -7.51210500 | 1.45456000  | -1.28394500 |
| C  | -6.28820500 | 1.91720900  | -1.77937900 |
| C  | -5.11272200 | 1.70540600  | -1.06188400 |
| C  | -5.16288700 | 1.02360100  | 0.17229800  |
| H  | -6.42895400 | 0.03056700  | 1.61599200  |
| H  | -8.51549000 | 0.41989100  | 0.32385100  |
| H  | -8.42411800 | 1.61942800  | -1.85065700 |
| H  | -6.25043800 | 2.44088500  | -2.73046600 |
| H  | -4.15082300 | 2.05473700  | -1.43024300 |
| Br | -1.50138800 | 2.89549100  | -1.58567500 |
| C  | 0.59727000  | 2.67872900  | 1.44189500  |
| C  | 1.62336000  | 2.77950700  | 2.56251900  |
| C  | -0.40878200 | 2.56850600  | 3.54246900  |
| C  | -0.63609500 | 2.54730100  | 2.04195600  |
| H  | 0.71936800  | 3.11014400  | 0.45689600  |
| H  | -1.56702200 | 2.79801400  | 1.54628100  |
| C  | 0.97769000  | 1.89797600  | 3.65279200  |
| H  | 1.43800400  | 2.03295700  | 4.63670900  |
| H  | 0.95921800  | 0.83458300  | 3.39957700  |
| C  | 1.37906900  | 4.20491100  | 3.16325900  |
| H  | 2.15414800  | 4.43322300  | 3.90128900  |
| H  | 1.40888000  | 4.98283500  | 2.39484400  |
| C  | -0.02277100 | 4.06232400  | 3.83521600  |
| H  | 0.03551200  | 4.21656600  | 4.91702600  |
| H  | -0.76172700 | 4.76368800  | 3.43737300  |
| H  | 2.65738000  | 2.57183100  | 2.29277500  |
| H  | -1.21391400 | 2.17123300  | 4.15902400  |
| C  | -1.65564200 | 0.17263800  | 2.04860100  |
| C  | -2.91445900 | 0.49837700  | 1.45069000  |
| C  | -3.95823900 | 0.75489700  | 0.87787300  |
| O  | -1.56908800 | -0.26845400 | 3.18686700  |

### TS4

B3LYP-D3/BSI SCF energy in acetonitrile: -2954.623034 a.u.



## SUPPORTING INFORMATION

M06/BSII SCF energy in acetonitrile: -2953.32919 a.u.

M06/BSII free energy in acetonitrile: -2952.630265 a.u.

|    |             |             |             |
|----|-------------|-------------|-------------|
| Pd | -0.16306200 | -0.56642600 | 0.73788600  |
| P  | 0.42517300  | 1.77460700  | 0.42343800  |
| P  | -2.20961500 | -0.61947400 | -0.47571700 |
| Fe | -1.45503200 | 2.03339200  | -2.46902000 |
| C  | -3.05142900 | 0.82134100  | -2.91594800 |
| C  | -1.06923400 | 0.79678800  | -4.10647800 |
| C  | -2.42830800 | 1.23470200  | -4.12919000 |
| C  | -1.81807700 | 3.15787000  | -0.79070300 |
| C  | -0.92739300 | 4.03146700  | -2.73372900 |
| C  | -2.11403900 | 3.93566700  | -1.94639500 |
| H  | -4.06673300 | 1.04379400  | -2.62359700 |
| H  | -0.32538800 | 0.98851300  | -4.86873100 |
| H  | -2.89593300 | 1.82347100  | -4.90759900 |
| H  | -2.51481000 | 2.88556200  | -0.01146100 |
| H  | -0.83567200 | 4.52521800  | -3.69225700 |
| H  | -3.08505900 | 4.33754200  | -2.20439000 |
| C  | -0.84257700 | 0.11216000  | -2.87965100 |
| C  | -2.06786700 | 0.12736900  | -2.12646200 |
| C  | 0.11011500  | 3.32137800  | -2.06203300 |
| C  | -0.43579700 | 2.76530700  | -0.85476200 |
| H  | 0.07992900  | -0.34815000 | -2.55073800 |
| H  | 1.12291000  | 3.19313900  | -2.41510900 |
| C  | 0.14918500  | 2.85832600  | 1.88749700  |
| C  | -0.26540900 | 2.31141200  | 3.11008500  |
| C  | 0.27861400  | 4.25429400  | 1.77092600  |
| C  | -0.54483200 | 3.14417300  | 4.19747800  |
| H  | -0.36553700 | 1.23870500  | 3.21891900  |
| C  | 0.00728000  | 5.08197100  | 2.85997800  |
| H  | 0.58889700  | 4.69452800  | 0.82792900  |
| C  | -0.40846000 | 4.52803300  | 4.07532900  |
| H  | -0.87095800 | 2.70773500  | 5.13733300  |
| H  | 0.11364700  | 6.15818300  | 2.75797800  |
| H  | -0.62794300 | 5.17420400  | 4.92056900  |
| C  | -2.91175400 | -2.27495100 | -0.87777600 |
| C  | -2.24048100 | -3.05728000 | -1.83361200 |
| C  | -4.03197300 | -2.80663900 | -0.22168700 |
| C  | -2.69443400 | -4.34201200 | -2.13371100 |
| H  | -1.34281600 | -2.68219700 | -2.31676400 |
| C  | -4.48109000 | -4.09465100 | -0.52601200 |
| H  | -4.55882600 | -2.22535700 | 0.52709200  |
| C  | -3.81609800 | -4.86425700 | -1.48262100 |
| H  | -2.16649900 | -4.93715400 | -2.87379200 |
| H  | -5.35162100 | -4.49297400 | -0.01251400 |
| H  | -4.16648400 | -5.86529000 | -1.71770800 |
| C  | -3.54984600 | 0.27721500  | 0.39425800  |
| C  | -4.85160900 | 0.37649900  | -0.12700600 |
| C  | -3.25261800 | 0.90508000  | 1.61269400  |

## SUPPORTING INFORMATION

|    |             |             |             |
|----|-------------|-------------|-------------|
| C  | -5.82185400 | 1.11979100  | 0.54616900  |
| H  | -5.11388000 | -0.13735800 | -1.04589600 |
| C  | -4.22450000 | 1.64897200  | 2.28496400  |
| H  | -2.25384200 | 0.82195200  | 2.02531000  |
| C  | -5.50878500 | 1.76321300  | 1.74839900  |
| H  | -6.82376500 | 1.19327900  | 0.13337600  |
| H  | -3.97304900 | 2.13943600  | 3.22096600  |
| H  | -6.26674700 | 2.34335600  | 2.26680400  |
| C  | 2.17792500  | 2.00321700  | -0.08457700 |
| C  | 3.08107000  | 2.83518500  | 0.58943800  |
| C  | 2.60888700  | 1.29469900  | -1.22007300 |
| C  | 4.38906100  | 2.97954300  | 0.11618300  |
| H  | 2.77585200  | 3.37170100  | 1.48131400  |
| C  | 3.90633300  | 1.46191600  | -1.70176800 |
| H  | 1.94309400  | 0.59109600  | -1.70993900 |
| C  | 4.79981200  | 2.30678700  | -1.03591100 |
| H  | 5.08341100  | 3.62261800  | 0.64969400  |
| H  | 4.22836200  | 0.90976000  | -2.57944800 |
| H  | 5.81648000  | 2.41980200  | -1.40089200 |
| C  | 6.38289300  | -0.44568700 | 0.77358100  |
| C  | 7.57489600  | -0.51984000 | 0.05777900  |
| C  | 7.61081700  | -1.16994100 | -1.18110500 |
| C  | 6.45072300  | -1.75005300 | -1.70629200 |
| C  | 5.25103100  | -1.68372700 | -1.00173100 |
| C  | 5.21184100  | -1.02763600 | 0.24684500  |
| H  | 6.34201800  | 0.06552200  | 1.73014700  |
| H  | 8.47598500  | -0.06883400 | 0.46262700  |
| H  | 8.54259900  | -1.22267700 | -1.73698800 |
| H  | 6.48205200  | -2.25060300 | -2.66982700 |
| H  | 4.33252800  | -2.10809300 | -1.39997700 |
| Br | 1.57650700  | -2.60041700 | -1.84478100 |
| C  | -0.52619000 | -2.59422200 | 1.19993700  |
| C  | -1.56238300 | -2.93128500 | 2.26604900  |
| C  | 0.42996600  | -2.88138400 | 3.34055200  |
| C  | 0.74935200  | -2.49996500 | 1.88741900  |
| H  | -0.55342900 | -3.09770700 | 0.23807200  |
| H  | 1.60401100  | -2.92948400 | 1.36945600  |
| C  | -0.96687300 | -2.25482600 | 3.51844600  |
| H  | -1.45576400 | -2.56860600 | 4.44581300  |
| H  | -0.95182400 | -1.16288600 | 3.46650200  |
| C  | -1.30778500 | -4.43490900 | 2.58739400  |
| H  | -2.08745200 | -4.80830200 | 3.25941800  |
| H  | -1.31844300 | -5.05420700 | 1.68553400  |
| C  | 0.08340500  | -4.40095400 | 3.29318100  |
| H  | 0.02225800  | -4.78789500 | 4.31505700  |
| H  | 0.84626200  | -4.97997500 | 2.76435900  |
| H  | -2.59434600 | -2.69549800 | 2.01104900  |
| H  | 1.19608400  | -2.61092600 | 4.06652700  |
| C  | 1.62567000  | -0.76394500 | 2.13828500  |
| C  | 2.89891800  | -0.83067200 | 1.49702900  |

## SUPPORTING INFORMATION

|   |            |             |            |
|---|------------|-------------|------------|
| C | 3.97798500 | -0.92355400 | 0.94136400 |
| O | 1.46081100 | -0.21898000 | 3.22336100 |

### INT7

B3LYP-D3/BSI SCF energy in acetonitrile: -2841.329922 a.u.

M06/BSII SCF energy in acetonitrile: -2840.061051 a.u.

M06/BSII free energy in acetonitrile: -2839.365485 a.u.

|    |             |             |             |
|----|-------------|-------------|-------------|
| Pd | -0.23664300 | -0.84969800 | 0.15449700  |
| P  | 1.46611800  | 0.91150000  | 0.17137500  |
| P  | -2.15129100 | 0.43683500  | 0.11362600  |
| Fe | -0.62955900 | 3.19170100  | -1.23748600 |
| C  | -2.67880400 | 3.03183400  | -1.19563200 |
| C  | -1.42551400 | 2.78574900  | -3.12325900 |
| C  | -2.28639400 | 3.67175400  | -2.40704400 |
| C  | 0.16098900  | 3.46775400  | 0.63750700  |
| C  | 0.79369000  | 4.71367200  | -1.20227000 |
| C  | 0.02195100  | 4.73367300  | -0.00121000 |
| H  | -3.29706100 | 3.46875700  | -0.42601100 |
| H  | -0.92915400 | 2.99986000  | -4.06067700 |
| H  | -2.55629400 | 4.67714000  | -2.70330400 |
| H  | -0.32385000 | 3.15971600  | 1.55237700  |
| H  | 0.86365900  | 5.51294800  | -1.92859200 |
| H  | -0.60181300 | 5.54866300  | 0.34221600  |
| C  | -1.28085600 | 1.59247700  | -2.36145100 |
| C  | -2.05249200 | 1.73570400  | -1.15609000 |
| C  | 1.42117600  | 3.43770100  | -1.30499600 |
| C  | 1.02932900  | 2.65275400  | -0.16816400 |
| H  | -0.69493400 | 0.72078200  | -2.62246400 |
| H  | 2.05226000  | 3.10031900  | -2.11503300 |
| C  | 2.24655900  | 1.05800800  | 1.83235500  |
| C  | 2.00077900  | 0.05519400  | 2.78298300  |
| C  | 3.01729500  | 2.17300000  | 2.20315200  |
| C  | 2.52724100  | 0.15386000  | 4.07300300  |
| H  | 1.39259400  | -0.80330100 | 2.51350500  |
| C  | 3.55203600  | 2.26552100  | 3.48904500  |
| H  | 3.19276600  | 2.97467200  | 1.49222200  |
| C  | 3.30843700  | 1.25655900  | 4.42608800  |
| H  | 2.32689400  | -0.63059100 | 4.79720700  |
| H  | 4.15125700  | 3.12969700  | 3.76132100  |
| H  | 3.71910700  | 1.33478600  | 5.42869400  |
| C  | -3.72757600 | -0.40618000 | -0.31275200 |
| C  | -3.87925400 | -0.87313000 | -1.62997700 |
| C  | -4.73139600 | -0.66917500 | 0.63081700  |
| C  | -5.02918300 | -1.57233500 | -1.99700400 |
| H  | -3.08471900 | -0.72845000 | -2.35674000 |
| C  | -5.88030800 | -1.37112500 | 0.25681400  |
| H  | -4.62515000 | -0.33198600 | 1.65591100  |
| C  | -6.03371500 | -1.82081200 | -1.05640300 |
| H  | -5.13622500 | -1.92960800 | -3.01751000 |

## SUPPORTING INFORMATION

|    |             |             |             |
|----|-------------|-------------|-------------|
| H  | -6.65316200 | -1.56510500 | 0.99505400  |
| H  | -6.92771700 | -2.36671700 | -1.34418900 |
| C  | -2.44591200 | 1.27876200  | 1.71570900  |
| C  | -3.54869000 | 2.12417900  | 1.92838700  |
| C  | -1.51658700 | 1.09521900  | 2.75085900  |
| C  | -3.69347400 | 2.79575500  | 3.14318700  |
| H  | -4.30166300 | 2.24830000  | 1.15723100  |
| C  | -1.66311500 | 1.76847400  | 3.96508900  |
| H  | -0.66954500 | 0.43589000  | 2.59733700  |
| C  | -2.74791900 | 2.62615700  | 4.16001100  |
| H  | -4.54738800 | 3.44916500  | 3.29630000  |
| H  | -0.92729000 | 1.62340600  | 4.75091200  |
| H  | -2.86349100 | 3.15401600  | 5.10226600  |
| C  | 2.80193400  | 0.66664000  | -1.06996800 |
| C  | 4.11062700  | 1.14224900  | -0.90057400 |
| C  | 2.43616400  | 0.06738600  | -2.28610200 |
| C  | 5.03550300  | 1.03415500  | -1.94041400 |
| H  | 4.41662300  | 1.59120600  | 0.03804600  |
| C  | 3.36319700  | -0.02728700 | -3.32723200 |
| H  | 1.43885000  | -0.34446400 | -2.42478000 |
| C  | 4.66131500  | 0.45965200  | -3.15922800 |
| H  | 6.04922000  | 1.39748500  | -1.79751300 |
| H  | 3.06945300  | -0.49129100 | -4.26480000 |
| H  | 5.38316200  | 0.38111400  | -3.96734600 |
| C  | 4.25617200  | -2.04798800 | 1.48462100  |
| C  | 5.62338300  | -1.78504200 | 1.43601000  |
| C  | 6.31649300  | -1.88497500 | 0.22598100  |
| C  | 5.63805400  | -2.25206400 | -0.94097100 |
| C  | 4.26999900  | -2.50607500 | -0.90561000 |
| C  | 3.56244100  | -2.40002400 | 0.30988700  |
| H  | 3.71842000  | -1.97767800 | 2.42239000  |
| H  | 6.14862400  | -1.50527300 | 2.34451600  |
| H  | 7.38223800  | -1.67812900 | 0.19173800  |
| H  | 6.17365100  | -2.32767500 | -1.88220100 |
| H  | 3.73572200  | -2.77173100 | -1.81121200 |
| C  | 2.16448100  | -2.68062700 | 0.33663700  |
| C  | 0.97671100  | -2.97213300 | 0.29470500  |
| Br | -0.63136600 | -2.08324700 | -3.33688100 |
| C  | -1.45338500 | -2.53041000 | 0.32706000  |
| C  | -2.15958100 | -2.74547500 | 1.67741800  |
| C  | -0.61363100 | -4.40221600 | 1.62903700  |
| C  | -0.35604800 | -3.62289200 | 0.30684700  |
| H  | -2.10078900 | -2.55691000 | -0.54712100 |
| H  | -0.42349300 | -4.25810700 | -0.58231800 |
| C  | -1.01985600 | -3.26046700 | 2.58336800  |
| H  | -1.37492900 | -3.62259500 | 3.55395900  |
| H  | -0.22420700 | -2.52582500 | 2.74753800  |
| C  | -3.02426600 | -4.02634700 | 1.52872100  |
| H  | -3.67346600 | -4.14774600 | 2.40327600  |
| H  | -3.66593500 | -3.98728300 | 0.64326500  |

## SUPPORTING INFORMATION

|   |             |             |            |
|---|-------------|-------------|------------|
| C | -1.95226700 | -5.16230300 | 1.45728600 |
| H | -2.08220100 | -5.88317400 | 2.27044300 |
| H | -1.98671600 | -5.71866900 | 0.51516700 |
| H | -2.71725500 | -1.88604900 | 2.05116800 |
| H | 0.22908300  | -5.02766500 | 1.93398400 |

### INT8

B3LYP-D3/BSI SCF energy in acetonitrile: -2954.65149 a.u.

M06/BSII SCF energy in acetonitrile: -2953.355021 a.u.

M06/BSII free energy in acetonitrile: -2952.654912 a.u.

|    |             |             |             |
|----|-------------|-------------|-------------|
| Pd | 0.12467700  | 0.37998300  | -0.91544900 |
| P  | -0.10868400 | -2.04355300 | -0.20811300 |
| P  | 0.81549200  | 1.11168400  | 1.29391900  |
| Fe | 2.53795600  | -1.79251300 | 1.89494600  |
| C  | 3.01897100  | -0.05351700 | 2.88569500  |
| C  | 4.31821900  | -0.95035500 | 1.19839100  |
| C  | 4.21527000  | -0.77486600 | 2.61141900  |
| C  | 0.74407700  | -2.56681300 | 2.53518700  |
| C  | 2.63890100  | -3.84988600 | 2.21657300  |
| C  | 1.80703400  | -3.23913100 | 3.20263300  |
| H  | 2.65884000  | 0.20922300  | 3.86877200  |
| H  | 5.09671900  | -1.49349900 | 0.67899300  |
| H  | 4.89994300  | -1.16361100 | 3.35403600  |
| H  | -0.04080500 | -1.99298500 | 3.00339900  |
| H  | 3.55007200  | -4.40242600 | 2.40445000  |
| H  | 1.97705400  | -3.24320200 | 4.27127500  |
| C  | 3.18847400  | -0.33812800 | 0.58885600  |
| C  | 2.36244700  | 0.21469600  | 1.63245400  |
| C  | 2.08959100  | -3.56556700 | 0.93351200  |
| C  | 0.91010700  | -2.76481900 | 1.11984600  |
| H  | 2.97586800  | -0.30293900 | -0.47364600 |
| H  | 2.50317300  | -3.86857200 | -0.01781800 |
| C  | -1.83186000 | -2.51090800 | 0.21634100  |
| C  | -2.88449400 | -1.82955600 | -0.41635700 |
| C  | -2.12846400 | -3.52927000 | 1.13554800  |
| C  | -4.20950600 | -2.15807600 | -0.12985600 |
| H  | -2.67619600 | -1.02422300 | -1.11381800 |
| C  | -3.45652300 | -3.84956600 | 1.42574300  |
| H  | -1.32928400 | -4.07242600 | 1.62775200  |
| C  | -4.49811400 | -3.16445800 | 0.79591900  |
| H  | -5.01255200 | -1.61548500 | -0.61611800 |
| H  | -3.67394200 | -4.63538800 | 2.14345000  |
| H  | -5.53083800 | -3.40937100 | 1.02717700  |
| C  | 1.24238400  | 2.80821900  | 1.86922300  |
| C  | 2.56656800  | 3.27120100  | 1.80233300  |
| C  | 0.24699000  | 3.65020400  | 2.38784300  |
| C  | 2.88544400  | 4.55702300  | 2.24149200  |
| H  | 3.34973000  | 2.63213900  | 1.40671800  |
| C  | 0.57052600  | 4.93431800  | 2.82861900  |

## SUPPORTING INFORMATION

|    |             |             |             |
|----|-------------|-------------|-------------|
| H  | -0.78079600 | 3.30723100  | 2.45083100  |
| C  | 1.88876700  | 5.39151100  | 2.75456500  |
| H  | 3.91349000  | 4.90298500  | 2.18581600  |
| H  | -0.20872100 | 5.57578800  | 3.22997300  |
| H  | 2.13902100  | 6.39108600  | 3.09809000  |
| C  | -0.45174000 | 0.61750100  | 2.52837400  |
| C  | -0.19153800 | 0.63838700  | 3.91011700  |
| C  | -1.72182200 | 0.23412600  | 2.08005700  |
| C  | -1.16475900 | 0.21310400  | 4.81287300  |
| H  | 0.76082000  | 0.99411000  | 4.28542900  |
| C  | -2.69902000 | -0.18725700 | 2.98652100  |
| H  | -1.95122100 | 0.26073700  | 1.02134300  |
| C  | -2.41608500 | -0.21443300 | 4.35179600  |
| H  | -0.94922800 | 0.22062900  | 5.87742000  |
| H  | -3.67293000 | -0.49230800 | 2.61671200  |
| H  | -3.16955700 | -0.55037200 | 5.05835400  |
| C  | 0.32836500  | -3.13657400 | -1.62455500 |
| C  | -0.35345700 | -4.33853400 | -1.87101900 |
| C  | 1.40908600  | -2.77281100 | -2.44269000 |
| C  | 0.04139300  | -5.16246200 | -2.92668200 |
| H  | -1.18941700 | -4.63475200 | -1.24542000 |
| C  | 1.80504300  | -3.60676600 | -3.49058700 |
| H  | 1.93805100  | -1.83540200 | -2.28966600 |
| C  | 1.12259700  | -4.80051100 | -3.73610400 |
| H  | -0.49600100 | -6.08766900 | -3.11510300 |
| H  | 2.64118800  | -3.31133700 | -4.11798200 |
| H  | 1.42679300  | -5.44427200 | -4.55668100 |
| C  | -4.75629100 | 1.36966400  | 0.51076600  |
| C  | -5.95116300 | 0.89051900  | 1.04485400  |
| C  | -6.95604900 | 0.40464500  | 0.20246300  |
| C  | -6.75908400 | 0.39951400  | -1.18239000 |
| C  | -5.56384400 | 0.87014400  | -1.72512900 |
| C  | -4.54540400 | 1.36078300  | -0.88252800 |
| H  | -3.97655400 | 1.74516900  | 1.16436700  |
| H  | -6.09731200 | 0.89717500  | 2.12116100  |
| H  | -7.88625200 | 0.03233800  | 0.62155700  |
| H  | -7.53648300 | 0.02447600  | -1.84181700 |
| H  | -5.40807200 | 0.86191900  | -2.79964300 |
| C  | -3.31886700 | 1.84533500  | -1.43365100 |
| C  | -2.27922400 | 2.26057100  | -1.90846200 |
| Br | 3.28823900  | 0.34537700  | -3.30419700 |
| C  | 0.29842800  | 2.27694200  | -1.96620800 |
| C  | 0.93894600  | 3.50530300  | -1.30111300 |
| C  | -0.96739300 | 4.36217500  | -2.16404900 |
| C  | -1.07556800 | 2.83954100  | -2.50506500 |
| H  | 0.93653200  | 1.93583600  | -2.78153900 |
| H  | -1.13537400 | 2.68874700  | -3.59091000 |
| C  | -0.27454200 | 4.30296500  | -0.78894900 |
| H  | -0.01018400 | 5.28771800  | -0.39055700 |
| H  | -0.86445800 | 3.76587100  | -0.04219600 |

## SUPPORTING INFORMATION

|   |             |             |             |
|---|-------------|-------------|-------------|
| C | 1.44296800  | 4.42521500  | -2.44899500 |
| H | 2.05937500  | 5.23043100  | -2.03257100 |
| H | 2.05551200  | 3.87763300  | -3.17123600 |
| C | 0.12283000  | 4.98593300  | -3.06227800 |
| H | 0.08610000  | 6.07830200  | -2.99990000 |
| H | -0.00867500 | 4.71259200  | -4.11455000 |
| H | 1.72423500  | 3.27934800  | -0.58656100 |
| H | -1.93281000 | 4.87210600  | -2.20583700 |
| C | -0.44171200 | -0.16935900 | -2.69255200 |
| O | -0.80109400 | -0.47035900 | -3.73454700 |

### TS5

B3LYP-D3/BSI SCF energy in acetonitrile: -2954.639912 a.u.

M06/BSII SCF energy in acetonitrile: -2953.342304 a.u.

M06/BSII free energy in acetonitrile: -2952.640855 a.u.

|    |             |             |             |
|----|-------------|-------------|-------------|
| Pd | 0.12379600  | 0.36586300  | -0.81055500 |
| P  | -0.13966600 | -1.98987000 | -0.50613000 |
| P  | 0.87124200  | 0.89969700  | 1.47927300  |
| Fe | 2.46312300  | -2.09908700 | 1.73363100  |
| C  | 2.93841300  | -0.56479900 | 3.01936000  |
| C  | 4.31448500  | -1.24239900 | 1.28966100  |
| C  | 4.12232800  | -1.29170500 | 2.70369200  |
| C  | 0.61740800  | -2.88409300 | 2.16886400  |
| C  | 2.47985200  | -4.18204800 | 1.73407700  |
| C  | 1.62373400  | -3.69462500 | 2.76758700  |
| H  | 2.51356100  | -0.45884700 | 4.00640000  |
| H  | 5.10565500  | -1.73265400 | 0.73775300  |
| H  | 4.73760700  | -1.83089900 | 3.41223000  |
| H  | -0.16983400 | -2.35644900 | 2.68627600  |
| H  | 3.36323100  | -4.79124500 | 1.87313200  |
| H  | 1.74406200  | -3.86748400 | 3.82897800  |
| C  | 3.25098500  | -0.48750400 | 0.72125900  |
| C  | 2.38080600  | -0.06697200 | 1.79018000  |
| C  | 2.00141700  | -3.68377300 | 0.48832200  |
| C  | 0.84038600  | -2.87660200 | 0.74696600  |
| H  | 3.10798200  | -0.27243300 | -0.33178800 |
| H  | 2.44606200  | -3.85364200 | -0.48212500 |
| C  | -1.87491200 | -2.47543000 | -0.15019400 |
| C  | -2.91553200 | -1.68474400 | -0.66272900 |
| C  | -2.18773600 | -3.62180000 | 0.59819000  |
| C  | -4.24589500 | -2.03381100 | -0.42768400 |
| H  | -2.69045400 | -0.78475100 | -1.22655500 |
| C  | -3.52059800 | -3.96390900 | 0.83536000  |
| H  | -1.39817500 | -4.24857000 | 0.99748100  |
| C  | -4.55088000 | -3.17049000 | 0.32535400  |
| H  | -5.04013500 | -1.40747100 | -0.81818200 |
| H  | -3.75044900 | -4.85033100 | 1.41958100  |
| H  | -5.58747400 | -3.43260300 | 0.51697300  |
| C  | 1.38125400  | 2.58466100  | 2.01855100  |

## SUPPORTING INFORMATION

|    |             |             |             |
|----|-------------|-------------|-------------|
| C  | 2.66575200  | 3.05353200  | 1.69682300  |
| C  | 0.49389500  | 3.43274200  | 2.69831200  |
| C  | 3.05232300  | 4.34789800  | 2.04793500  |
| H  | 3.36626200  | 2.40950900  | 1.17350900  |
| C  | 0.88692700  | 4.72440500  | 3.05475000  |
| H  | -0.50413700 | 3.08974800  | 2.95219000  |
| C  | 2.16436100  | 5.18633400  | 2.72820500  |
| H  | 4.04864300  | 4.69791200  | 1.79328600  |
| H  | 0.19211600  | 5.36896800  | 3.58562600  |
| H  | 2.46764200  | 6.19215200  | 3.00435400  |
| C  | -0.37727100 | 0.40304000  | 2.72739300  |
| C  | -0.12145000 | 0.43534200  | 4.10907700  |
| C  | -1.63252800 | -0.02889800 | 2.27675200  |
| C  | -1.08567100 | -0.01369400 | 5.01156300  |
| H  | 0.81974100  | 0.82406900  | 4.48239900  |
| C  | -2.59969500 | -0.47454200 | 3.18132100  |
| H  | -1.85541800 | -0.02275600 | 1.21651100  |
| C  | -2.32166900 | -0.48088000 | 4.54890200  |
| H  | -0.87499000 | 0.00634100  | 6.07695400  |
| H  | -3.56314000 | -0.81086300 | 2.81069900  |
| H  | -3.06786700 | -0.83298700 | 5.25535800  |
| C  | 0.30256600  | -2.90837500 | -2.03792700 |
| C  | -0.33852000 | -4.10957900 | -2.37929100 |
| C  | 1.34760000  | -2.42655000 | -2.84014500 |
| C  | 0.06079200  | -4.81691300 | -3.51451700 |
| H  | -1.14590900 | -4.49645200 | -1.76602900 |
| C  | 1.74795400  | -3.14505900 | -3.96925000 |
| H  | 1.84768800  | -1.48998100 | -2.60382900 |
| C  | 1.10590300  | -4.33786600 | -4.31008600 |
| H  | -0.44521400 | -5.74203200 | -3.77568200 |
| H  | 2.55759300  | -2.76341200 | -4.58506200 |
| H  | 1.41405000  | -4.89057500 | -5.19316500 |
| C  | -4.60497200 | 1.32446100  | 0.75179500  |
| C  | -5.74035200 | 0.80125700  | 1.36749000  |
| C  | -6.86695200 | 0.47273300  | 0.60706900  |
| C  | -6.85359100 | 0.67241900  | -0.77723300 |
| C  | -5.71934800 | 1.18891400  | -1.40312700 |
| C  | -4.57863400 | 1.51871800  | -0.64361200 |
| H  | -3.73053600 | 1.57659400  | 1.34142600  |
| H  | -5.74328400 | 0.64863100  | 2.44286000  |
| H  | -7.75012800 | 0.06421500  | 1.08948400  |
| H  | -7.72702300 | 0.42122800  | -1.37209400 |
| H  | -5.70574900 | 1.33877400  | -2.47837200 |
| C  | -3.40960600 | 2.04374800  | -1.27683000 |
| C  | -2.42030400 | 2.49864200  | -1.81634300 |
| Br | 3.27334900  | 0.81611800  | -2.92627400 |
| C  | 0.10300400  | 2.38488800  | -2.23531700 |
| C  | 0.92622600  | 3.33274800  | -1.32658300 |
| C  | -0.96217500 | 4.51330000  | -1.74033900 |
| C  | -1.26036400 | 3.14091900  | -2.43097800 |



## SUPPORTING INFORMATION

|   |             |            |             |
|---|-------------|------------|-------------|
| H | 0.64903300  | 2.23652400 | -3.16461000 |
| H | -1.46138500 | 3.27263000 | -3.50064200 |
| C | -0.15772100 | 4.05587000 | -0.50841100 |
| H | 0.24052000  | 4.88691700 | 0.08010900  |
| H | -0.72408500 | 3.39475200 | 0.15166700  |
| C | 1.41439400  | 4.47893300 | -2.25237100 |
| H | 2.12545200  | 5.10651900 | -1.70285900 |
| H | 1.92610100  | 4.09648900 | -3.13934000 |
| C | 0.10259900  | 5.26106500 | -2.57427200 |
| H | 0.17031700  | 6.30477200 | -2.25195000 |
| H | -0.14183700 | 5.26218100 | -3.64163100 |
| H | 1.73983900  | 2.85495100 | -0.79138900 |
| H | -1.87194100 | 5.08693000 | -1.54953400 |
| C | -0.40054500 | 0.44430300 | -2.60390800 |
| O | -0.79766200 | 0.19097200 | -3.66609900 |

### INT9

B3LYP-D3/BSI SCF energy in acetonitrile: -2954.678209 a.u.

M06/BSII SCF energy in acetonitrile: -2953.391778 a.u.

M06/BSII free energy in acetonitrile: -2952.692418 a.u.

|    |             |             |             |
|----|-------------|-------------|-------------|
| Pd | 0.09760400  | -0.37354400 | 0.13553500  |
| P  | -2.16750500 | -1.39488100 | 0.37421900  |
| P  | -0.56106400 | 1.67061000  | -0.75943800 |
| Fe | -3.51307000 | 0.51364900  | -2.07895400 |
| C  | -1.68498800 | 0.21793000  | -2.96799600 |
| C  | -3.29157600 | 1.63624400  | -3.82513500 |
| C  | -2.67324100 | 0.35908400  | -3.98269700 |
| C  | -4.41325000 | -1.25419200 | -1.49974800 |
| C  | -5.29373600 | 0.83310600  | -1.04842300 |
| C  | -5.41497600 | -0.31628200 | -1.88634600 |
| H  | -1.06144300 | -0.64822200 | -2.79508900 |
| H  | -4.11154200 | 2.02378900  | -4.41571600 |
| H  | -2.93941200 | -0.39184400 | -4.71471900 |
| H  | -4.22718100 | -2.21341700 | -1.96183100 |
| H  | -5.88805300 | 1.73522300  | -1.11268700 |
| H  | -6.12076500 | -0.44335900 | -2.69673600 |
| C  | -2.68957000 | 2.29095200  | -2.71186100 |
| C  | -1.68968500 | 1.41206500  | -2.16461500 |
| C  | -4.21054100 | 0.61456000  | -0.14940700 |
| C  | -3.65369000 | -0.68320800 | -0.42212200 |
| H  | -2.97305400 | 3.25720800  | -2.32166000 |
| H  | -3.84964500 | 1.31175200  | 0.59201800  |
| C  | -2.26677700 | -3.12704200 | -0.23725500 |
| C  | -3.12310100 | -4.08490900 | 0.32316400  |
| C  | -1.50093800 | -3.46360800 | -1.36348500 |
| C  | -3.21223300 | -5.36137900 | -0.23770500 |
| H  | -3.72254900 | -3.84062800 | 1.19473000  |
| C  | -1.60331600 | -4.73430100 | -1.93253700 |
| H  | -0.81446600 | -2.73575100 | -1.78410100 |

## SUPPORTING INFORMATION

|   |             |             |             |
|---|-------------|-------------|-------------|
| C | -2.45771200 | -5.68640800 | -1.36863500 |
| H | -3.87446700 | -6.09920400 | 0.20662600  |
| H | -1.00818100 | -4.98356600 | -2.80672900 |
| H | -2.53186600 | -6.67821400 | -1.80576700 |
| C | -1.44272000 | 2.71407100  | 0.46358500  |
| C | -1.94358100 | 3.98809900  | 0.14759200  |
| C | -1.63347800 | 2.20475200  | 1.75797300  |
| C | -2.65005500 | 4.72058700  | 1.10292300  |
| H | -1.76881600 | 4.41753600  | -0.83331900 |
| C | -2.34041300 | 2.93931300  | 2.71166200  |
| H | -1.24182800 | 1.22550600  | 2.01328800  |
| C | -2.85558300 | 4.19543500  | 2.38301600  |
| H | -3.03509400 | 5.70376100  | 0.84852300  |
| H | -2.48759300 | 2.52677500  | 3.70569900  |
| H | -3.40739000 | 4.76845700  | 3.12262500  |
| C | 0.71486700  | 2.75489400  | -1.51972900 |
| C | 1.27260100  | 2.35270400  | -2.74466500 |
| C | 1.20150400  | 3.91208900  | -0.89461200 |
| C | 2.29259700  | 3.09835500  | -3.33462600 |
| H | 0.91331000  | 1.45526100  | -3.23943800 |
| C | 2.22633500  | 4.65453000  | -1.48657500 |
| H | 0.78691700  | 4.24233800  | 0.05141700  |
| C | 2.77556500  | 4.24949400  | -2.70509900 |
| H | 2.71225100  | 2.77785000  | -4.28404400 |
| H | 2.59228600  | 5.55003900  | -0.99249100 |
| H | 3.57258600  | 4.82791200  | -3.16349900 |
| C | -2.66836900 | -1.43563700 | 2.14814400  |
| C | -4.01619200 | -1.48288200 | 2.54163900  |
| C | -1.67300300 | -1.36220100 | 3.13750100  |
| C | -4.35960800 | -1.45761500 | 3.89484400  |
| H | -4.80091800 | -1.53210900 | 1.79353500  |
| C | -2.01964500 | -1.33445000 | 4.49000600  |
| H | -0.62719700 | -1.33222800 | 2.84942600  |
| C | -3.36314600 | -1.37922300 | 4.87147000  |
| H | -5.40606700 | -1.49459400 | 4.18431800  |
| H | -1.23928900 | -1.27366400 | 5.24365000  |
| H | -3.63253100 | -1.35217000 | 5.92355300  |
| C | 7.84754600  | -1.47922600 | -0.25639100 |
| C | 8.70114000  | -2.09813100 | -1.16875700 |
| C | 8.19152100  | -2.66231200 | -2.34224200 |
| C | 6.81828700  | -2.60347300 | -2.60083000 |
| C | 5.95724200  | -1.98563200 | -1.69542200 |
| C | 6.46189900  | -1.41457700 | -0.50805200 |
| H | 8.24372400  | -1.04208800 | 0.65527300  |
| H | 9.76695800  | -2.14048100 | -0.96245300 |
| H | 8.85959500  | -3.14406700 | -3.05040900 |
| H | 6.41618600  | -3.03965800 | -3.51100100 |
| H | 4.89123100  | -1.93840800 | -1.89686100 |
| C | 5.57738400  | -0.78166900 | 0.41974500  |
| C | 4.77713600  | -0.24732300 | 1.16085100  |

## SUPPORTING INFORMATION

|    |            |             |             |
|----|------------|-------------|-------------|
| C  | 2.38879400 | 0.62630500  | 1.72991300  |
| C  | 2.20917400 | 2.15132500  | 2.00009400  |
| C  | 4.38069300 | 1.82922400  | 2.53524300  |
| C  | 3.90461000 | 0.38759400  | 2.14182500  |
| H  | 1.73689700 | 0.04129900  | 2.37830800  |
| H  | 3.90365400 | -0.25332400 | 3.03154000  |
| C  | 3.57518600 | 2.71070700  | 1.56054900  |
| H  | 3.68271900 | 3.78195900  | 1.76075600  |
| H  | 3.80122600 | 2.51546900  | 0.50898700  |
| C  | 2.23262500 | 2.38040000  | 3.52897500  |
| H  | 1.89555300 | 3.39576700  | 3.76160100  |
| H  | 1.57208800 | 1.68441100  | 4.05592600  |
| C  | 3.73940800 | 2.18639300  | 3.89450300  |
| H  | 4.17271800 | 3.11306400  | 4.28443700  |
| H  | 3.89908700 | 1.40565200  | 4.64496800  |
| H  | 1.32687700 | 2.56945500  | 1.51783700  |
| H  | 5.46745800 | 1.93461500  | 2.50999300  |
| C  | 2.00058900 | 0.32696400  | 0.27882200  |
| O  | 2.73720400 | 0.50050600  | -0.66356900 |
| Br | 1.19507200 | -2.62482600 | 0.95428900  |

### OMe<sup>-</sup>

B3LYP-D3/BSI SCF energy in acetonitrile: -115.176612 a.u.

M06/BSII SCF energy in acetonitrile: -115.1727077 a.u.

M06/BSII free energy in acetonitrile: -115.1601287 a.u.

|   |             |             |             |
|---|-------------|-------------|-------------|
| O | 0.79147600  | 0.00009600  | 0.00001700  |
| C | -0.52509400 | 0.00020800  | -0.00004800 |
| H | -1.06174900 | 1.01072600  | -0.15360700 |
| H | -1.05951200 | -0.63950000 | -0.79862400 |
| H | -1.05998400 | -0.37323900 | 0.95237800  |

### INT10

B3LYP-D3/BSI SCF energy in acetonitrile: -3056.361528 a.u.

M06/BSII SCF energy in acetonitrile: -3055.065263 a.u.

M06/BSII free energy in acetonitrile: -3054.323592 a.u.

|    |             |             |             |
|----|-------------|-------------|-------------|
| Pd | -0.12790100 | 0.23346800  | 0.13619200  |
| P  | 1.80391600  | 1.70816500  | 0.50971500  |
| P  | 0.87679500  | -1.67248900 | -0.71125700 |
| Fe | 3.97702400  | -0.27882000 | -1.16013600 |
| C  | 2.50936800  | -0.23667000 | -2.59469200 |
| C  | 4.42331200  | -1.51190300 | -2.78170600 |
| C  | 3.77807900  | -0.32225800 | -3.23555900 |
| C  | 4.56211000  | 1.59519600  | -0.51543900 |
| C  | 5.30381800  | -0.37400500 | 0.44116400  |
| C  | 5.66746500  | 0.69841100  | -0.42885700 |
| H  | 1.79386300  | 0.56520300  | -2.70131300 |
| H  | 5.41994300  | -1.83769300 | -3.04990700 |
| H  | 4.19643800  | 0.41321400  | -3.90991400 |

## SUPPORTING INFORMATION

|   |             |             |             |
|---|-------------|-------------|-------------|
| H | 4.51303700  | 2.49147400  | -1.11772500 |
| H | 5.91415500  | -1.23452000 | 0.68211500  |
| H | 6.60340800  | 0.79525500  | -0.96346800 |
| C | 3.55472800  | -2.16833700 | -1.86139200 |
| C | 2.35799000  | -1.37975100 | -1.73429000 |
| C | 3.96929600  | -0.14950300 | 0.88639900  |
| C | 3.49719900  | 1.07404900  | 0.29477800  |
| H | 3.78186900  | -3.07245300 | -1.31633600 |
| H | 3.39296900  | -0.80391900 | 1.52539700  |
| C | 1.78117200  | 3.18092900  | -0.59424100 |
| C | 2.51032300  | 4.34465900  | -0.30180800 |
| C | 1.02716600  | 3.12379600  | -1.77665400 |
| C | 2.49402100  | 5.42592200  | -1.18444000 |
| H | 3.09066200  | 4.40664600  | 0.61417000  |
| C | 1.01563900  | 4.20526000  | -2.66142600 |
| H | 0.43942100  | 2.23739200  | -1.99816900 |
| C | 1.74990700  | 5.35640300  | -2.36696800 |
| H | 3.06159800  | 6.32202700  | -0.94973000 |
| H | 0.42690000  | 4.15001500  | -3.57278100 |
| H | 1.73808800  | 6.19947900  | -3.05202100 |
| C | 1.40446300  | -2.86241700 | 0.58090600  |
| C | 1.91838500  | -4.13445100 | 0.27753800  |
| C | 1.28288500  | -2.47741500 | 1.92597400  |
| C | 2.31583800  | -4.99550700 | 1.30193800  |
| H | 1.99554600  | -4.46078200 | -0.75448000 |
| C | 1.68164400  | -3.34015400 | 2.94899000  |
| H | 0.87050300  | -1.50152800 | 2.16750900  |
| C | 2.20080700  | -4.59921100 | 2.63785800  |
| H | 2.70980100  | -5.97729200 | 1.05573900  |
| H | 1.58124100  | -3.02990100 | 3.98499300  |
| H | 2.50880400  | -5.27250700 | 3.43265800  |
| C | -0.19323600 | -2.62146300 | -1.87799900 |
| C | -0.50060700 | -2.01764300 | -3.10869700 |
| C | -0.78941900 | -3.84911700 | -1.55696400 |
| C | -1.37372700 | -2.63550500 | -4.00390000 |
| H | -0.06451100 | -1.05788800 | -3.37070400 |
| C | -1.67024900 | -4.46232100 | -2.45199200 |
| H | -0.57456500 | -4.33546600 | -0.61238000 |
| C | -1.96480800 | -3.85946300 | -3.67653000 |
| H | -1.59715900 | -2.15690400 | -4.95333100 |
| H | -2.12380100 | -5.41361900 | -2.18814600 |
| H | -2.64986900 | -4.33799900 | -4.37056500 |
| C | 1.86585200  | 2.41811300  | 2.21101300  |
| C | 3.07621300  | 2.65035000  | 2.88437200  |
| C | 0.65028800  | 2.72916400  | 2.84649200  |
| C | 3.07202200  | 3.19017700  | 4.17294900  |
| H | 4.02180000  | 2.41330200  | 2.40707600  |
| C | 0.65537300  | 3.27065800  | 4.13421400  |
| H | -0.28484900 | 2.54229800  | 2.31733600  |
| C | 1.86272100  | 3.50094500  | 4.80039500  |

## SUPPORTING INFORMATION

|   |             |             |             |
|---|-------------|-------------|-------------|
| H | 4.01388900  | 3.36749000  | 4.68504600  |
| H | -0.28699900 | 3.50890700  | 4.62079200  |
| H | 1.86203000  | 3.91873200  | 5.80338700  |
| C | -7.67847400 | 1.51182200  | -0.14362400 |
| C | -8.51839800 | 2.30903300  | -0.91983300 |
| C | -7.99197800 | 3.09845300  | -1.94700000 |
| C | -6.61553000 | 3.08670100  | -2.19382900 |
| C | -5.76766200 | 2.29271200  | -1.42321900 |
| C | -6.28924400 | 1.49198800  | -0.38572400 |
| H | -8.08775500 | 0.89896800  | 0.65398400  |
| H | -9.58661700 | 2.31416700  | -0.72171800 |
| H | -8.64924500 | 3.71868100  | -2.54971900 |
| H | -6.19994600 | 3.69874400  | -2.98954700 |
| H | -4.69898900 | 2.28699100  | -1.61239000 |
| C | -5.42615600 | 0.67483300  | 0.40921700  |
| C | -4.67321500 | -0.01909400 | 1.06258500  |
| C | -2.36290500 | -1.12617600 | 1.51084500  |
| C | -2.29306400 | -2.68324200 | 1.56126600  |
| C | -4.43694000 | -2.28219700 | 2.15617800  |
| C | -3.85948300 | -0.83950100 | 1.95336800  |
| H | -1.67742600 | -0.68354500 | 2.23456600  |
| H | -3.82588800 | -0.32118900 | 2.91931400  |
| C | -3.69697100 | -3.07763600 | 1.06294600  |
| H | -3.88232200 | -4.15581800 | 1.11731400  |
| H | -3.90636600 | -2.72258400 | 0.05062300  |
| C | -2.33203200 | -3.12474300 | 3.04119800  |
| H | -2.07860900 | -4.18657300 | 3.12632600  |
| H | -1.61693400 | -2.56647400 | 3.65340800  |
| C | -3.81836200 | -2.86264600 | 3.44824300  |
| H | -4.32236900 | -3.79491300 | 3.72216900  |
| H | -3.91328900 | -2.17523100 | 4.29506800  |
| H | -1.44696600 | -3.08882800 | 1.00863700  |
| H | -5.52864800 | -2.30801600 | 2.13046500  |
| C | -1.94349000 | -0.65342000 | 0.11905100  |
| O | -2.65339800 | -0.74639900 | -0.85977600 |
| O | -1.46317900 | 1.72396500  | 0.84267900  |
| C | -2.11848200 | 2.48039300  | -0.13450500 |
| H | -2.95178400 | 3.04759500  | 0.31846000  |
| H | -1.46110400 | 3.22315000  | -0.62541200 |
| H | -2.55908900 | 1.86470300  | -0.93974800 |

### TS6

B3LYP-D3/BSI SCF energy in acetonitrile: -3056.356638 a.u.

M06/BSII SCF energy in acetonitrile: -3055.061998 a.u.

M06/BSII free energy in acetonitrile: -3054.322815 a.u.

|    |             |             |             |
|----|-------------|-------------|-------------|
| Pd | 0.09681500  | -0.17973500 | 0.06156600  |
| P  | -1.61858300 | -1.92035300 | 0.39626700  |
| P  | -1.06472800 | 1.69775900  | -0.61321300 |
| Fe | -4.15425400 | 0.11507900  | -0.48971500 |

## SUPPORTING INFORMATION

|   |             |             |             |
|---|-------------|-------------|-------------|
| C | -3.03798300 | 0.32333900  | -2.20088700 |
| C | -4.98673700 | 1.49757700  | -1.80729100 |
| C | -4.42098800 | 0.40521400  | -2.53293100 |
| C | -4.54624800 | -1.85191400 | -0.00734500 |
| C | -5.10655000 | -0.06902600 | 1.35451300  |
| C | -5.62578100 | -1.03177000 | 0.43640900  |
| H | -2.33536600 | -0.41511100 | -2.56026600 |
| H | -6.02861400 | 1.79050000  | -1.80851600 |
| H | -4.95751700 | -0.27592300 | -3.18044900 |
| H | -4.60987200 | -2.64934300 | -0.73424300 |
| H | -5.66920000 | 0.71867500  | 1.83817700  |
| H | -6.65233600 | -1.10211900 | 0.10090100  |
| C | -3.95320900 | 2.09883100  | -1.03092500 |
| C | -2.73586900 | 1.37236400  | -1.26594100 |
| C | -3.70362700 | -0.28484600 | 1.47389400  |
| C | -3.34365100 | -1.39168500 | 0.62840800  |
| H | -4.06765200 | 2.93165900  | -0.35162900 |
| H | -3.01653900 | 0.30379800  | 2.06560700  |
| C | -1.70940400 | -3.13872600 | -0.98306700 |
| C | -2.41626700 | -4.34791100 | -0.87794600 |
| C | -1.03007600 | -2.84576100 | -2.17637400 |
| C | -2.45812000 | -5.23567700 | -1.95412300 |
| H | -2.93266600 | -4.59825700 | 0.04397800  |
| C | -1.07340300 | -3.73530500 | -3.25342500 |
| H | -0.46305300 | -1.92196200 | -2.25879200 |
| C | -1.78861500 | -4.92997000 | -3.14393600 |
| H | -3.00925100 | -6.16748500 | -1.86300800 |
| H | -0.54293400 | -3.49727100 | -4.17114500 |
| H | -1.81997900 | -5.62454800 | -3.97869300 |
| C | -1.37927500 | 2.90998800  | 0.73776000  |
| C | -1.74040900 | 4.23984700  | 0.47014200  |
| C | -1.25388200 | 2.48886400  | 2.07052900  |
| C | -1.98039100 | 5.12855100  | 1.52022900  |
| H | -1.83133600 | 4.58236900  | -0.55638100 |
| C | -1.50055800 | 3.37703300  | 3.11956500  |
| H | -0.94485700 | 1.46929300  | 2.28413900  |
| C | -1.86336000 | 4.69846900  | 2.84566000  |
| H | -2.25677800 | 6.15642000  | 1.30290700  |
| H | -1.39611000 | 3.04001400  | 4.14683400  |
| H | -2.04675000 | 5.39277200  | 3.66071600  |
| C | -0.35845700 | 2.74429800  | -1.96718700 |
| C | -1.07899700 | 3.03614600  | -3.13737400 |
| C | 0.93637100  | 3.27089300  | -1.82429600 |
| C | -0.51853400 | 3.83799100  | -4.13552400 |
| H | -2.08162400 | 2.64772800  | -3.27502400 |
| C | 1.48932500  | 4.07932100  | -2.81760200 |
| H | 1.52219900  | 3.04237900  | -0.94548100 |
| C | 0.76504100  | 4.36448500  | -3.97841000 |
| H | -1.09203100 | 4.05415200  | -5.03274900 |
| H | 2.49090400  | 4.47956000  | -2.68563600 |

## SUPPORTING INFORMATION

|   |             |             |             |
|---|-------------|-------------|-------------|
| H | 1.19840400  | 4.98983100  | -4.75389300 |
| C | -1.32915100 | -2.97415500 | 1.88304700  |
| C | -2.37845700 | -3.56843400 | 2.60323200  |
| C | -0.00334400 | -3.18430500 | 2.29962700  |
| C | -2.10555700 | -4.36796400 | 3.71532000  |
| H | -3.40819000 | -3.40858200 | 2.29781600  |
| C | 0.26361300  | -3.98849400 | 3.41076300  |
| H | 0.81204900  | -2.70329300 | 1.76310800  |
| C | -0.78450700 | -4.58201400 | 4.11944900  |
| H | -2.92474600 | -4.82379800 | 4.26468700  |
| H | 1.29180800  | -4.14486900 | 3.72636100  |
| H | -0.57447700 | -5.20325500 | 4.98573600  |
| C | 7.81261500  | -1.32756300 | -0.22345100 |
| C | 8.67704900  | -1.98438000 | -1.09827400 |
| C | 8.21034300  | -2.46094300 | -2.32723100 |
| C | 6.86930200  | -2.27602400 | -2.67853600 |
| C | 5.99775000  | -1.61995500 | -1.81090600 |
| C | 6.45888700  | -1.13661800 | -0.56833400 |
| H | 8.17550000  | -0.95811000 | 0.73104400  |
| H | 9.71778500  | -2.12469300 | -0.81968100 |
| H | 8.88667400  | -2.97238000 | -3.00618200 |
| H | 6.50070400  | -2.64369900 | -3.63217400 |
| H | 4.95656400  | -1.47735000 | -2.08176400 |
| C | 5.56477400  | -0.46533500 | 0.32275700  |
| C | 4.76133300  | 0.09660200  | 1.03943200  |
| C | 2.38591800  | 1.03142500  | 1.53166200  |
| C | 2.24697900  | 2.57322300  | 1.66001900  |
| C | 4.39064100  | 2.23997100  | 2.29443300  |
| C | 3.89186000  | 0.78782100  | 1.98450100  |
| H | 1.71630400  | 0.52247000  | 2.22654900  |
| H | 3.87665700  | 0.19528200  | 2.90676600  |
| C | 3.64308900  | 3.06181800  | 1.22579700  |
| H | 3.77696300  | 4.14238000  | 1.34434100  |
| H | 3.89729300  | 2.77217100  | 0.20254100  |
| C | 2.22785100  | 2.93656500  | 3.16247500  |
| H | 1.92688500  | 3.98056600  | 3.29646600  |
| H | 1.52100000  | 2.31787100  | 3.72377300  |
| C | 3.71177300  | 2.71346900  | 3.59907100  |
| H | 4.16716700  | 3.64712800  | 3.94478000  |
| H | 3.81280700  | 1.97905800  | 4.40487800  |
| H | 1.39353800  | 2.97000200  | 1.11133000  |
| H | 5.48016600  | 2.31879100  | 2.30207100  |
| C | 2.03415300  | 0.56082600  | 0.12008300  |
| O | 2.66663800  | 0.82409700  | -0.88794100 |
| O | 1.92033900  | -1.31040800 | 0.51503100  |
| C | 2.38596200  | -2.11227500 | -0.54747600 |
| H | 3.30985200  | -2.62791200 | -0.24608400 |
| H | 1.64477300  | -2.87405500 | -0.83606900 |
| H | 2.61752800  | -1.50898700 | -1.43955200 |

## SUPPORTING INFORMATION

### product

B3LYP-D3/BSI SCF energy in acetonitrile: -809.1117285 a.u.

M06/BSII SCF energy in acetonitrile: -808.6968878 a.u.

M06/BSII free energy in acetonitrile: -808.4319628 a.u.

|   |             |             |             |
|---|-------------|-------------|-------------|
| C | 3.41763300  | -1.51372300 | -0.76797800 |
| C | 4.77611100  | -1.38780900 | -0.47988700 |
| C | 5.21734100  | -0.43332200 | 0.44185800  |
| C | 4.29109800  | 0.39851700  | 1.07948200  |
| C | 2.93103300  | 0.27969200  | 0.79983700  |
| C | 2.47854900  | -0.67882200 | -0.13118900 |
| H | 3.07395500  | -2.25371300 | -1.48435200 |
| H | 5.49227600  | -2.03628100 | -0.97663200 |
| H | 6.27667700  | -0.33863100 | 0.66257600  |
| H | 4.62901200  | 1.14090200  | 1.79693500  |
| H | 2.20628900  | 0.92035400  | 1.29312000  |
| C | 1.08152300  | -0.78083500 | -0.41489100 |
| C | -0.11357600 | -0.80600200 | -0.62672700 |
| C | -2.22585900 | 0.61368500  | -0.41997500 |
| C | -3.19371700 | 0.21897900  | 0.72000200  |
| C | -2.30587700 | -1.77707300 | 0.12618300  |
| C | -1.55973200 | -0.78356800 | -0.82252900 |
| H | -2.75483000 | 1.01979000  | -1.28570800 |
| H | -1.78187500 | -1.00861100 | -1.87069700 |
| C | -2.44128300 | -0.93759200 | 1.41091500  |
| H | -3.03786500 | -1.43318300 | 2.18393800  |
| H | -1.48206200 | -0.63088500 | 1.83624500  |
| C | -4.39377000 | -0.52062500 | 0.08757700  |
| H | -5.18315300 | -0.66593700 | 0.83182100  |
| H | -4.82792900 | 0.03557500  | -0.74928100 |
| C | -3.77333300 | -1.88791400 | -0.34822000 |
| H | -4.26884300 | -2.72562900 | 0.15222800  |
| H | -3.84267800 | -2.06203200 | -1.42686000 |
| H | -3.46549100 | 1.06485700  | 1.35413000  |
| H | -1.78868700 | -2.73463300 | 0.21610800  |
| C | -1.18978700 | 1.63476300  | 0.00225300  |
| O | -0.87964900 | 1.90423900  | 1.14783700  |
| O | -0.62784000 | 2.21603400  | -1.07374600 |
| C | 0.44818800  | 3.13653600  | -0.80222700 |
| H | 1.27765800  | 2.62221400  | -0.30890700 |
| H | 0.76591500  | 3.51478900  | -1.77429800 |
| H | 0.10428500  | 3.95953300  | -0.17000600 |

### TS2a

B3LYP-D3/BSI SCF energy in acetonitrile: -2841.256679 a.u.

M06/BSII SCF energy in acetonitrile: -2839.99592 a.u.

M06/BSII free energy in acetonitrile: -2839.30935 a.u.

|    |             |             |            |
|----|-------------|-------------|------------|
| Pd | -2.16963000 | 0.31266600  | 0.72250800 |
| P  | -1.43059600 | -1.91603200 | 0.37969000 |



## SUPPORTING INFORMATION

|    |             |             |             |
|----|-------------|-------------|-------------|
| P  | 3.96230600  | 0.26481900  | 0.65175800  |
| Fe | 1.25881300  | -0.37821000 | -1.46836500 |
| C  | 2.79443200  | 0.88064500  | -2.00894700 |
| C  | 0.70221900  | 1.63354400  | -1.38404700 |
| C  | 1.55871100  | 1.39381800  | -2.50120300 |
| C  | 1.27851400  | -2.30248600 | -0.68112800 |
| C  | 0.97252600  | -1.82154600 | -2.91693600 |
| C  | 1.92156900  | -2.27535800 | -1.95244400 |
| H  | 3.63408600  | 0.56698900  | -2.61320000 |
| H  | -0.31553200 | 1.99297200  | -1.42045000 |
| H  | 1.29791400  | 1.52412900  | -3.54378700 |
| H  | 1.74033600  | -2.57441600 | 0.25477500  |
| H  | 1.16447400  | -1.64790800 | -3.96767600 |
| H  | 2.96338200  | -2.50179600 | -2.13265200 |
| C  | 1.40931800  | 1.27100800  | -0.20273400 |
| C  | 2.71158800  | 0.79996500  | -0.57523000 |
| C  | -0.25356500 | -1.55436400 | -2.24228500 |
| C  | -0.08413700 | -1.88691400 | -0.85130700 |
| H  | 1.01193900  | 1.29927000  | 0.80124000  |
| H  | -1.15695500 | -1.17928600 | -2.69879800 |
| C  | -0.81820200 | -2.93776200 | 1.78495400  |
| C  | -1.19982100 | -2.61661800 | 3.09444600  |
| C  | -0.10869700 | -4.12894500 | 1.54998000  |
| C  | -0.84496500 | -3.45255500 | 4.15721200  |
| H  | -1.76220700 | -1.71162500 | 3.28724900  |
| C  | 0.25586000  | -4.95299100 | 2.61434800  |
| H  | 0.14856500  | -4.42399300 | 0.53810500  |
| C  | -0.10717300 | -4.61372700 | 3.92171900  |
| H  | -1.14494000 | -3.19102600 | 5.16815100  |
| H  | 0.81274400  | -5.86540000 | 2.42074600  |
| H  | 0.17454000  | -5.25851100 | 4.74944200  |
| C  | 5.27167800  | 1.55415700  | 0.41297300  |
| C  | 4.95579300  | 2.85703300  | -0.00518600 |
| C  | 6.60337800  | 1.26369000  | 0.75995500  |
| C  | 5.94788200  | 3.83781500  | -0.09044000 |
| H  | 3.93355200  | 3.11084700  | -0.27062100 |
| C  | 7.59367000  | 2.24300800  | 0.66975100  |
| H  | 6.87259800  | 0.26303600  | 1.08816500  |
| C  | 7.26995500  | 3.53455000  | 0.24286000  |
| H  | 5.68464400  | 4.83891600  | -0.42157300 |
| H  | 8.61894800  | 1.99603900  | 0.93213800  |
| H  | 8.04101800  | 4.29662600  | 0.17230200  |
| C  | 4.73735000  | -1.20997800 | -0.15414100 |
| C  | 5.49742100  | -1.14408100 | -1.33469700 |
| C  | 4.51575400  | -2.46297400 | 0.43718600  |
| C  | 5.99363500  | -2.30766900 | -1.92440800 |
| H  | 5.70899500  | -0.18152300 | -1.79009200 |
| C  | 5.01197800  | -3.62938400 | -0.15247600 |
| H  | 3.94548600  | -2.52975200 | 1.36017100  |
| C  | 5.74626000  | -3.55406000 | -1.33775600 |

## SUPPORTING INFORMATION

|    |             |             |             |
|----|-------------|-------------|-------------|
| H  | 6.57525500  | -2.24259200 | -2.83998100 |
| H  | 4.82747900  | -4.59191100 | 0.31649400  |
| H  | 6.13374700  | -4.45868800 | -1.79797300 |
| C  | -2.66431000 | -3.10565800 | -0.31436700 |
| C  | -2.47885500 | -3.82596600 | -1.50152500 |
| C  | -3.84064600 | -3.30285800 | 0.42916900  |
| C  | -3.46458400 | -4.71174300 | -1.94791500 |
| H  | -1.57399800 | -3.70150700 | -2.08480300 |
| C  | -4.82037500 | -4.18894300 | -0.01728400 |
| H  | -3.99186900 | -2.76091800 | 1.35961500  |
| C  | -4.63698700 | -4.89195300 | -1.21244900 |
| H  | -3.31009300 | -5.26119300 | -2.87233100 |
| H  | -5.72651200 | -4.32825400 | 0.56545500  |
| H  | -5.40212900 | -5.57807900 | -1.56413300 |
| C  | -1.76693100 | 5.53757500  | -0.65937400 |
| C  | -1.63252900 | 6.92230800  | -0.73479500 |
| C  | -2.03466900 | 7.73092700  | 0.33353700  |
| C  | -2.57465700 | 7.14371800  | 1.48246300  |
| C  | -2.71208900 | 5.75967500  | 1.56863400  |
| C  | -2.30922500 | 4.93298900  | 0.49691800  |
| H  | -1.45563400 | 4.91038400  | -1.48959900 |
| H  | -1.21220100 | 7.37244900  | -1.62986500 |
| H  | -1.92758100 | 8.81005500  | 0.27149000  |
| H  | -2.88812700 | 7.76667200  | 2.31560500  |
| H  | -3.12884700 | 5.30460700  | 2.46229200  |
| C  | -2.44265900 | 3.51615800  | 0.57364400  |
| C  | -2.52607600 | 2.29033300  | 0.62316200  |
| Br | -0.60931300 | 0.78671700  | 2.77142700  |
| C  | -3.92046300 | -0.07366800 | -0.51730600 |
| C  | -3.76250100 | -0.31216900 | -2.01865800 |
| C  | -4.17275900 | 1.90402900  | -1.76914300 |
| C  | -4.21420100 | 1.30828300  | -0.38396000 |
| H  | -4.43710700 | -0.80161400 | 0.10164100  |
| H  | -4.85988300 | 1.70018300  | 0.39284800  |
| C  | -3.12697100 | 1.01687500  | -2.47641200 |
| H  | -3.13346800 | 1.14359700  | -3.56291400 |
| H  | -2.11434900 | 1.16160800  | -2.09523900 |
| C  | -5.20405700 | -0.16677700 | -2.59710100 |
| H  | -5.20942700 | -0.44276700 | -3.65620600 |
| H  | -5.92050800 | -0.81044600 | -2.07853300 |
| C  | -5.50058100 | 1.35200100  | -2.40523600 |
| H  | -5.66376300 | 1.85667500  | -3.36165200 |
| H  | -6.37314000 | 1.54571700  | -1.77460600 |
| H  | -3.26080700 | -1.23682400 | -2.29527100 |
| H  | -4.05730800 | 2.98546300  | -1.81760300 |

### TS2b

B3LYP-D3/BSI SCF energy in acetonitrile: -2841.273591 a.u.

M06/BSII SCF energy in acetonitrile: -2840.014983 a.u.

M06/BSII free energy in acetonitrile: -2839.326603 a.u.

## SUPPORTING INFORMATION

|    |             |             |             |
|----|-------------|-------------|-------------|
| Pd | -2.53433100 | 0.96492900  | 0.28409200  |
| P  | -1.68962400 | -1.26863500 | 0.57746000  |
| P  | 3.07522100  | -0.25512400 | -0.01328700 |
| Fe | 0.44167500  | -1.08378700 | -2.19748400 |
| C  | 2.30058300  | -0.49310200 | -2.87232000 |
| C  | 0.43103200  | 0.86725200  | -2.90369600 |
| C  | 1.28243400  | 0.04921900  | -3.71041100 |
| C  | 0.18139300  | -2.80288300 | -1.06672100 |
| C  | -0.69861700 | -2.50859800 | -3.18047000 |
| C  | 0.34426300  | -3.14392900 | -2.43864700 |
| H  | 3.07971200  | -1.17552900 | -3.18164000 |
| H  | -0.45947400 | 1.38483300  | -3.23493300 |
| H  | 1.14787400  | -0.16508200 | -4.76290600 |
| H  | 0.82878600  | -3.10807700 | -0.26027600 |
| H  | -0.82749100 | -2.54155100 | -4.25442200 |
| H  | 1.14736100  | -3.74252900 | -2.84821100 |
| C  | 0.92531400  | 0.82947500  | -1.56907400 |
| C  | 2.08966300  | -0.01205900 | -1.53421500 |
| C  | -1.50296600 | -1.76495100 | -2.27003700 |
| C  | -0.96836400 | -1.94849600 | -0.94729100 |
| H  | 0.48383800  | 1.32026400  | -0.71476500 |
| H  | -2.36267500 | -1.15804100 | -2.51490300 |
| C  | -0.48384100 | -1.78500000 | 1.87995100  |
| C  | 0.28005800  | -0.84429100 | 2.58007000  |
| C  | -0.33585500 | -3.15016600 | 2.19097200  |
| C  | 1.17740500  | -1.25365100 | 3.57168100  |
| H  | 0.17431700  | 0.20578800  | 2.35333300  |
| C  | 0.56207100  | -3.55689700 | 3.17713400  |
| H  | -0.92246800 | -3.89673100 | 1.66511100  |
| C  | 1.32066300  | -2.60808100 | 3.87261800  |
| H  | 1.76266600  | -0.50701600 | 4.10065400  |
| H  | 0.66728400  | -4.61383400 | 3.40489400  |
| H  | 2.01750200  | -2.92690400 | 4.64250400  |
| C  | 4.55434100  | 0.80224500  | -0.36421600 |
| C  | 4.59355200  | 1.75482200  | -1.39361100 |
| C  | 5.64091800  | 0.72936000  | 0.52636000  |
| C  | 5.68988500  | 2.61271500  | -1.52890200 |
| H  | 3.76647100  | 1.83769300  | -2.09155300 |
| C  | 6.73721300  | 1.58021100  | 0.38714300  |
| H  | 5.62858000  | 0.00446800  | 1.33718300  |
| C  | 6.76408100  | 2.52946300  | -0.64057300 |
| H  | 5.70200600  | 3.34523400  | -2.33175900 |
| H  | 7.56786700  | 1.50741600  | 1.08401700  |
| H  | 7.61438400  | 3.19742000  | -0.74569900 |
| C  | 3.76861000  | -1.95512900 | -0.23747400 |
| C  | 4.72830600  | -2.28855000 | -1.20829100 |
| C  | 3.29016700  | -2.96179900 | 0.61605700  |
| C  | 5.17450400  | -3.60520100 | -1.33928100 |
| H  | 5.12989600  | -1.51742700 | -1.85929800 |

## SUPPORTING INFORMATION

|    |             |             |             |
|----|-------------|-------------|-------------|
| C  | 3.73414200  | -4.28022700 | 0.48357500  |
| H  | 2.56515800  | -2.71556900 | 1.38613100  |
| C  | 4.67418400  | -4.60475400 | -0.49727400 |
| H  | 5.91418500  | -3.85161700 | -2.09630500 |
| H  | 3.35004500  | -5.04707300 | 1.15081400  |
| H  | 5.02379600  | -5.62825800 | -0.60066800 |
| C  | -3.09707600 | -2.39041900 | 0.96870700  |
| C  | -3.36355200 | -3.56117300 | 0.24934700  |
| C  | -3.91392600 | -2.04707600 | 2.05726800  |
| C  | -4.43733200 | -4.37913200 | 0.61485900  |
| H  | -2.74053200 | -3.83775400 | -0.59520900 |
| C  | -4.97954900 | -2.86785100 | 2.42454400  |
| H  | -3.72036400 | -1.13240200 | 2.61283900  |
| C  | -5.24565900 | -4.03554400 | 1.70083700  |
| H  | -4.63805600 | -5.28600200 | 0.05102500  |
| H  | -5.60604100 | -2.59424900 | 3.26905900  |
| H  | -6.07884000 | -4.67298400 | 1.98317700  |
| C  | 2.26529400  | 3.26062300  | 1.10888400  |
| C  | 3.56127600  | 3.56366100  | 1.51884700  |
| C  | 3.94823600  | 3.35539700  | 2.84645500  |
| C  | 3.02735700  | 2.84937200  | 3.77039700  |
| C  | 1.72667100  | 2.54691700  | 3.37327400  |
| C  | 1.32856500  | 2.74427900  | 2.03234200  |
| H  | 1.96957300  | 3.39927900  | 0.07376700  |
| H  | 4.27792500  | 3.94064400  | 0.79587700  |
| H  | 4.96419000  | 3.58112000  | 3.15689400  |
| H  | 3.32519100  | 2.68593800  | 4.80220500  |
| H  | 1.01270300  | 2.14540700  | 4.08576800  |
| C  | 0.02598500  | 2.37922400  | 1.59823000  |
| C  | -1.06829000 | 2.00630200  | 1.17027000  |
| Br | -4.51175300 | 0.06837600  | -1.13022700 |
| C  | -3.47334500 | 2.90498800  | 0.05641900  |
| C  | -3.35760500 | 3.55930500  | -1.31838500 |
| C  | -1.73324000 | 4.48846200  | -0.03531900 |
| C  | -2.44920900 | 3.49552000  | 0.85481500  |
| H  | -4.44857000 | 2.68665300  | 0.48551400  |
| H  | -2.57704700 | 3.67417200  | 1.91665000  |
| C  | -1.83575700 | 3.81334000  | -1.41922200 |
| H  | -1.57184700 | 4.49141400  | -2.23628000 |
| H  | -1.23947600 | 2.90084400  | -1.49567600 |
| C  | -3.87765300 | 5.01591800  | -1.11156600 |
| H  | -3.93583500 | 5.53286300  | -2.07500200 |
| H  | -4.87308100 | 5.03792700  | -0.65851200 |
| C  | -2.78143000 | 5.64412900  | -0.19614600 |
| H  | -2.29242100 | 6.49631600  | -0.67706200 |
| H  | -3.17026000 | 5.98601900  | 0.76764200  |
| H  | -3.83253800 | 3.00829900  | -2.12937300 |
| H  | -0.75064500 | 4.80415200  | 0.31357900  |

TS3a

## SUPPORTING INFORMATION

B3LYP-D3/BSI SCF energy in acetonitrile: -2681.822046 a.u.

M06/BSII SCF energy in acetonitrile: -2680.710147 a.u.

M06/BSII free energy in acetonitrile: -2680.167344 a.u.

|    |             |             |             |
|----|-------------|-------------|-------------|
| Pd | -2.51345300 | -0.38125700 | 0.27411200  |
| P  | -0.66667900 | -1.84706600 | 0.42660000  |
| P  | 3.58600400  | 1.25071000  | 0.76991600  |
| Fe | 1.20248000  | 0.19130300  | -1.58787000 |
| C  | 2.36053100  | 1.87725400  | -1.86885900 |
| C  | 0.12366600  | 1.93941800  | -1.28497100 |
| C  | 1.04396200  | 2.10354200  | -2.36656900 |
| C  | 1.81624000  | -1.72225600 | -1.10433500 |
| C  | 1.03783600  | -1.12128300 | -3.19346800 |
| C  | 2.21231700  | -1.41970000 | -2.43713800 |
| H  | 3.26850600  | 1.90044000  | -2.45443100 |
| H  | -0.95473400 | 2.00634200  | -1.34418900 |
| H  | 0.78372000  | 2.31257800  | -3.39624300 |
| H  | 2.47871800  | -1.95417900 | -0.28678500 |
| H  | 1.00988000  | -0.81136600 | -4.22982600 |
| H  | 3.23258800  | -1.37575400 | -2.79383300 |
| C  | 0.87670900  | 1.61398600  | -0.11998900 |
| C  | 2.26928700  | 1.56901000  | -0.46685600 |
| C  | -0.08896300 | -1.23351200 | -2.33154300 |
| C  | 0.38602300  | -1.61025200 | -1.02602600 |
| H  | 0.47700300  | 1.40147300  | 0.85972600  |
| H  | -1.12108500 | -1.05228200 | -2.59464900 |
| C  | 0.48133200  | -1.73992500 | 1.85788200  |
| C  | 0.41826900  | -0.67757100 | 2.76797700  |
| C  | 1.45091700  | -2.74239300 | 2.03919500  |
| C  | 1.32358500  | -0.60230300 | 3.82995700  |
| H  | -0.33433700 | 0.09179700  | 2.66042200  |
| C  | 2.35659600  | -2.66184600 | 3.09696400  |
| H  | 1.49897700  | -3.58517700 | 1.35683300  |
| C  | 2.29661600  | -1.58954700 | 3.99311400  |
| H  | 1.26365900  | 0.22795600  | 4.52749500  |
| H  | 3.10494400  | -3.43878600 | 3.22303500  |
| H  | 3.00126400  | -1.52978800 | 4.81741800  |
| C  | 4.51985600  | 2.84913300  | 0.69613000  |
| C  | 3.86241500  | 4.06487500  | 0.44406600  |
| C  | 5.89004900  | 2.87945400  | 1.01122300  |
| C  | 4.55969400  | 5.27482600  | 0.48788000  |
| H  | 2.80235300  | 4.07164500  | 0.20686300  |
| C  | 6.58575900  | 4.08914700  | 1.05170400  |
| H  | 6.42174200  | 1.95314400  | 1.21198500  |
| C  | 5.92385000  | 5.29198600  | 0.78835500  |
| H  | 4.03441500  | 6.20391200  | 0.28277600  |
| H  | 7.64673200  | 4.09068100  | 1.28699800  |
| H  | 6.46609800  | 6.23287000  | 0.81811600  |
| C  | 4.73596000  | 0.09582300  | -0.10467000 |
| C  | 5.45363100  | 0.43372900  | -1.26512100 |

## SUPPORTING INFORMATION

|    |             |             |             |
|----|-------------|-------------|-------------|
| C  | 4.87046200  | -1.19897000 | 0.42003700  |
| C  | 6.25844700  | -0.51255000 | -1.90144000 |
| H  | 5.39347700  | 1.44053200  | -1.66637100 |
| C  | 5.67571100  | -2.14784500 | -0.21703100 |
| H  | 4.33323000  | -1.47187900 | 1.32474000  |
| C  | 6.36578200  | -1.80793300 | -1.38229400 |
| H  | 6.80495400  | -0.23937700 | -2.80002600 |
| H  | 5.76408600  | -3.14751800 | 0.19926800  |
| H  | 6.99273000  | -2.54299000 | -1.87922100 |
| C  | -1.14647300 | -3.61554500 | 0.42608500  |
| C  | -0.59969500 | -4.53776500 | -0.47439600 |
| C  | -2.08429600 | -4.04356400 | 1.37877100  |
| C  | -0.98757600 | -5.87977000 | -0.41977800 |
| H  | 0.12395200  | -4.21581200 | -1.21658700 |
| C  | -2.46358000 | -5.38400500 | 1.43378900  |
| H  | -2.52242800 | -3.32813600 | 2.07055400  |
| C  | -1.91696900 | -6.30422300 | 0.53233100  |
| H  | -0.56109800 | -6.59119500 | -1.12125900 |
| H  | -3.18961500 | -5.70992200 | 2.17316800  |
| H  | -2.21646500 | -7.34761700 | 0.57254300  |
| C  | -6.73297700 | 3.13271700  | 1.07360300  |
| C  | -7.67817100 | 4.14997300  | 0.97618500  |
| C  | -7.52473900 | 5.16452000  | 0.02505600  |
| C  | -6.42007400 | 5.16371700  | -0.83353900 |
| C  | -5.46690100 | 4.15308700  | -0.74649000 |
| C  | -5.61590400 | 3.12536500  | 0.21018000  |
| H  | -6.84508000 | 2.34123500  | 1.80800100  |
| H  | -8.53617200 | 4.15268500  | 1.64172400  |
| H  | -8.26598700 | 5.95511800  | -0.04721500 |
| H  | -6.30303600 | 5.95180100  | -1.57130200 |
| H  | -4.60747400 | 4.14443700  | -1.40961300 |
| C  | -4.64565600 | 2.09323800  | 0.30383400  |
| C  | -3.80534700 | 1.19621500  | 0.37916100  |
| Br | -3.70162600 | -1.86264800 | -1.45800800 |
| C  | -2.28730100 | 1.12994500  | 1.38518700  |
| O  | -1.93367700 | 1.94198600  | 2.14287500  |

### TS3b

B3LYP-D3/BSI SCF energy in acetonitrile: -2681.820182 a.u.

M06/BSII SCF energy in acetonitrile: -2680.707794 a.u.

M06/BSII free energy in acetonitrile: -2680.164963 a.u.

|    |             |             |             |
|----|-------------|-------------|-------------|
| Pd | 2.39153700  | 0.44019100  | 1.53777200  |
| P  | 1.34114300  | 1.36849400  | -0.41461100 |
| P  | -3.60409100 | 0.15334400  | 0.70647300  |
| Fe | -0.77710400 | -1.30950000 | -0.86869300 |
| C  | -2.42491600 | -2.39218000 | -0.25784700 |
| C  | -0.40898100 | -2.38590200 | 0.87066800  |
| C  | -1.23599900 | -3.14051600 | -0.01695900 |
| C  | -0.76440000 | 0.33426700  | -2.13268100 |

## SUPPORTING INFORMATION

|   |             |             |             |
|---|-------------|-------------|-------------|
| C | 0.06084100  | -1.73947800 | -2.72124200 |
| C | -1.04170200 | -0.84475300 | -2.87988200 |
| H | -3.23723700 | -2.68813000 | -0.90654500 |
| H | 0.58062500  | -2.65583400 | 1.20913000  |
| H | -0.98065300 | -4.09025300 | -0.46912000 |
| H | -1.41493800 | 1.18773500  | -2.03064800 |
| H | 0.13732900  | -2.73734500 | -3.13279200 |
| H | -1.95261900 | -1.04072400 | -3.42948500 |
| C | -1.08825200 | -1.17326000 | 1.17848000  |
| C | -2.34732000 | -1.16321600 | 0.48512500  |
| C | 1.01787100  | -1.12008100 | -1.86819200 |
| C | 0.51220900  | 0.17316300  | -1.49541100 |
| H | -0.70820100 | -0.37650200 | 1.80378200  |
| H | 1.94954200  | -1.55243400 | -1.53929400 |
| C | 0.06868300  | 2.67189900  | -0.18620000 |
| C | -0.70795000 | 2.68180100  | 0.98041700  |
| C | -0.16302000 | 3.63751200  | -1.17933800 |
| C | -1.70153400 | 3.64827600  | 1.15469700  |
| H | -0.52648900 | 1.94997600  | 1.75867100  |
| C | -1.15659200 | 4.60162300  | -1.00187000 |
| H | 0.42877400  | 3.63878000  | -2.08959300 |
| C | -1.92415400 | 4.61112000  | 0.16740400  |
| H | -2.29793600 | 3.64734400  | 2.06218700  |
| H | -1.32825300 | 5.34568300  | -1.77430100 |
| H | -2.69360400 | 5.36515700  | 0.30599800  |
| C | -5.02608900 | -0.83066700 | 1.37014500  |
| C | -4.81901100 | -1.94988500 | 2.19389400  |
| C | -6.34388100 | -0.38604400 | 1.16124000  |
| C | -5.90008400 | -2.61501300 | 2.77797600  |
| H | -3.81118600 | -2.30952000 | 2.38029100  |
| C | -7.42299400 | -1.05371800 | 1.74305600  |
| H | -6.53147700 | 0.47953900  | 0.53159700  |
| C | -7.20581000 | -2.17256800 | 2.55258700  |
| H | -5.71911500 | -3.48292200 | 3.40657900  |
| H | -8.43450800 | -0.70033000 | 1.56135800  |
| H | -8.04587400 | -2.69249300 | 3.00439500  |
| C | -4.15958900 | 0.51868300  | -1.01950900 |
| C | -4.81777400 | -0.40749000 | -1.84715500 |
| C | -3.86589000 | 1.79273400  | -1.52957900 |
| C | -5.14423900 | -0.07366000 | -3.16278500 |
| H | -5.08637400 | -1.38611200 | -1.46149000 |
| C | -4.19157900 | 2.12717700  | -2.84738100 |
| H | -3.36665300 | 2.52330100  | -0.89965300 |
| C | -4.82551300 | 1.19221800  | -3.66796600 |
| H | -5.64984600 | -0.79976400 | -3.79370400 |
| H | -3.94903500 | 3.11589400  | -3.22719500 |
| H | -5.07999600 | 1.44860100  | -4.69260100 |
| C | 2.62198700  | 2.15262900  | -1.47184300 |
| C | 2.67209600  | 1.95775500  | -2.85945100 |
| C | 3.58007500  | 2.97339200  | -0.85205500 |

## SUPPORTING INFORMATION

|    |            |             |             |
|----|------------|-------------|-------------|
| C  | 3.66900400 | 2.57793500  | -3.61745600 |
| H  | 1.93726000 | 1.32718000  | -3.34998100 |
| C  | 4.56929900 | 3.59506300  | -1.61451100 |
| H  | 3.54885700 | 3.12600900  | 0.22402600  |
| C  | 4.61662200 | 3.39619400  | -2.99808900 |
| H  | 3.70176100 | 2.42156400  | -4.69195500 |
| H  | 5.30546900 | 4.22899900  | -1.12843200 |
| H  | 5.39075500 | 3.87609000  | -3.58999700 |
| C  | 4.83828500 | -3.89541500 | -0.84098200 |
| C  | 5.07245800 | -5.08032500 | -1.53212700 |
| C  | 4.06271400 | -6.04319300 | -1.64083900 |
| C  | 2.81171400 | -5.82372800 | -1.05347300 |
| C  | 2.56353500 | -4.64523300 | -0.35612100 |
| C  | 3.57883500 | -3.66817100 | -0.24406000 |
| H  | 5.61321300 | -3.14010200 | -0.75622600 |
| H  | 6.04140800 | -5.25380000 | -1.99032000 |
| H  | 4.25096700 | -6.96467300 | -2.18399500 |
| H  | 2.03021200 | -6.57274000 | -1.13919600 |
| H  | 1.59576900 | -4.46575800 | 0.09978000  |
| C  | 3.31339800 | -2.45240700 | 0.43199600  |
| C  | 3.02612500 | -1.38953100 | 0.98730600  |
| Br | 2.21313100 | 2.48487300  | 3.05053600  |
| C  | 3.34472900 | -0.82922100 | 2.61744800  |
| O  | 3.88768400 | -1.37237600 | 3.49573900  |

### TS4a

B3LYP-D3/BSI SCF energy in acetonitrile: -2954.602048 a.u.

M06/BSII SCF energy in acetonitrile: -2953.317152 a.u.

M06/BSII free energy in acetonitrile: -2952.622155 a.u.

|    |             |             |             |
|----|-------------|-------------|-------------|
| Pd | -1.78913100 | 1.53510700  | -0.26164300 |
| P  | -1.20671200 | -0.77192900 | -0.72966800 |
| P  | 3.84486100  | -0.43855600 | 1.14590500  |
| Fe | 1.98695800  | 0.04861000  | -1.81582600 |
| C  | 3.86715800  | 0.85310500  | -1.51889100 |
| C  | 1.91157800  | 2.08149200  | -1.42724700 |
| C  | 3.04862200  | 1.77321000  | -2.23607600 |
| C  | 1.32656400  | -1.91898400 | -1.65105800 |
| C  | 1.62967600  | -0.82421200 | -3.66024500 |
| C  | 2.19711500  | -1.78750000 | -2.77057700 |
| H  | 4.78473800  | 0.40868200  | -1.87770600 |
| H  | 1.07534300  | 2.70560300  | -1.71192200 |
| H  | 3.22863000  | 2.13035700  | -3.24201100 |
| H  | 1.48361600  | -2.55889100 | -0.79750800 |
| H  | 2.07154900  | -0.47222700 | -4.58343400 |
| H  | 3.14077900  | -2.30099700 | -2.89897600 |
| C  | 2.03206900  | 1.35604700  | -0.20621400 |
| C  | 3.24598800  | 0.58774300  | -0.24954500 |
| C  | 0.41683000  | -0.34613300 | -3.08540200 |
| C  | 0.21793500  | -1.02520200 | -1.83403100 |



## SUPPORTING INFORMATION

|   |             |             |             |
|---|-------------|-------------|-------------|
| H | 1.31937000  | 1.36552600  | 0.60804000  |
| H | -0.23278300 | 0.41797600  | -3.48790300 |
| C | -0.82770900 | -1.91411900 | 0.66656900  |
| C | 0.26775000  | -1.61687800 | 1.49340200  |
| C | -1.60062100 | -3.05102000 | 0.94478900  |
| C | 0.58848500  | -2.44229500 | 2.57070200  |
| H | 0.87476900  | -0.74397600 | 1.29521100  |
| C | -1.28119400 | -3.87314500 | 2.02906500  |
| H | -2.45583400 | -3.29873700 | 0.32558100  |
| C | -0.18770900 | -3.57271900 | 2.84443300  |
| H | 1.44530300  | -2.19874400 | 3.19246100  |
| H | -1.89225500 | -4.74730500 | 2.23494300  |
| H | 0.05828300  | -4.21333100 | 3.68655800  |
| C | 5.38946200  | 0.46559900  | 1.62074800  |
| C | 5.53305000  | 1.84707000  | 1.41341300  |
| C | 6.40449000  | -0.21988100 | 2.31261600  |
| C | 6.66734000  | 2.52204300  | 1.87327300  |
| H | 4.76111700  | 2.40157500  | 0.88787300  |
| C | 7.53912900  | 0.45454200  | 2.76560300  |
| H | 6.31510500  | -1.28911500 | 2.48749900  |
| C | 7.67548900  | 1.82904900  | 2.54709200  |
| H | 6.76280700  | 3.59043800  | 1.69853000  |
| H | 8.31765500  | -0.09416300 | 3.28885400  |
| H | 8.55874700  | 2.35384600  | 2.90010900  |
| C | 4.51992800  | -1.93153400 | 0.28500700  |
| C | 5.66306400  | -1.90894800 | -0.53212300 |
| C | 3.81773000  | -3.13818400 | 0.43228100  |
| C | 6.07296200  | -3.05804300 | -1.21046400 |
| H | 6.23712700  | -0.99324700 | -0.63383300 |
| C | 4.22662100  | -4.28895400 | -0.24797800 |
| H | 2.94060200  | -3.17635100 | 1.07297700  |
| C | 5.35122400  | -4.24924900 | -1.07526000 |
| H | 6.95621100  | -3.02510700 | -1.84262700 |
| H | 3.66935500  | -5.21379600 | -0.12711700 |
| H | 5.67112800  | -5.14258600 | -1.60436500 |
| C | -2.59777500 | -1.61324900 | -1.58611800 |
| C | -2.39353500 | -2.57584500 | -2.58475000 |
| C | -3.90716300 | -1.30464700 | -1.18504500 |
| C | -3.48551700 | -3.21478100 | -3.17774600 |
| H | -1.38613600 | -2.82929600 | -2.90081400 |
| C | -4.99533700 | -1.95614400 | -1.76650900 |
| H | -4.07454300 | -0.55849300 | -0.41469200 |
| C | -4.78630700 | -2.90879200 | -2.76838900 |
| H | -3.31876200 | -3.95490300 | -3.95540100 |
| H | -6.00360100 | -1.71663700 | -1.44066700 |
| H | -5.63339100 | -3.40992800 | -3.22829000 |
| C | -4.30217300 | -2.50200200 | 3.32415800  |
| C | -5.31879300 | -3.45132300 | 3.38616200  |
| C | -6.53598800 | -3.22319400 | 2.73521200  |
| C | -6.74102100 | -2.03729400 | 2.02163200  |

## SUPPORTING INFORMATION

|    |             |             |             |
|----|-------------|-------------|-------------|
| C  | -5.73196900 | -1.08073500 | 1.95064600  |
| C  | -4.49988800 | -1.30695800 | 2.60126800  |
| H  | -3.35182600 | -2.67582500 | 3.81706300  |
| H  | -5.16107800 | -4.37215800 | 3.93962900  |
| H  | -7.32407300 | -3.96904100 | 2.78357500  |
| H  | -7.68584400 | -1.86114600 | 1.51621000  |
| H  | -5.87937900 | -0.16215300 | 1.39146000  |
| C  | -3.45183600 | -0.35650400 | 2.47766300  |
| C  | -2.54822800 | 0.44616500  | 2.31709900  |
| Br | -2.37787400 | 2.08482100  | -2.72914100 |
| C  | -2.45420900 | 3.45501400  | 0.21021200  |
| C  | -1.53798700 | 4.62936500  | -0.08367200 |
| C  | -1.09434800 | 4.03693600  | 2.05880000  |
| C  | -2.16167000 | 3.03615500  | 1.58672000  |
| H  | -3.48213800 | 3.48624000  | -0.14613900 |
| H  | -3.03879900 | 2.88313400  | 2.21701900  |
| C  | -0.29487500 | 4.28095900  | 0.76581300  |
| H  | 0.40935000  | 5.11408500  | 0.85282600  |
| H  | 0.23823300  | 3.39414000  | 0.41873900  |
| C  | -2.13332200 | 5.81544900  | 0.74008800  |
| H  | -1.60960000 | 6.74115200  | 0.48046400  |
| H  | -3.19800300 | 5.96552000  | 0.53775000  |
| C  | -1.84682500 | 5.39122700  | 2.21367400  |
| H  | -1.19464800 | 6.11214500  | 2.71575300  |
| H  | -2.75547500 | 5.29155700  | 2.81480700  |
| H  | -1.39080400 | 4.83632800  | -1.14394700 |
| H  | -0.53567000 | 3.71342700  | 2.93656700  |
| C  | -1.49439900 | 1.34186500  | 1.92115200  |
| O  | -0.35273400 | 1.29359600  | 2.36857000  |

### TS4b

B3LYP-D3/BSI SCF energy in acetonitrile: -2954.599296 a.u.

M06/BSII SCF energy in acetonitrile: -2953.319051 a.u.

M06/BSII free energy in acetonitrile: -2952.625472 a.u.

|    |             |             |             |
|----|-------------|-------------|-------------|
| Pd | 2.54561100  | 0.25733400  | -0.89395900 |
| P  | 0.84605200  | 0.49840500  | 0.71858400  |
| P  | -4.12112500 | -0.88932600 | 0.14677800  |
| Fe | -2.00318000 | 1.67451100  | -0.98566400 |
| C  | -3.86902000 | 1.34224700  | -1.80004300 |
| C  | -1.89069300 | 0.76290300  | -2.84580000 |
| C  | -2.95290800 | 1.71808300  | -2.82575700 |
| C  | -1.62869200 | 2.01829500  | 1.01534900  |
| C  | -1.38166000 | 3.62274700  | -0.62790700 |
| C  | -2.22617000 | 3.17220100  | 0.43443200  |
| H  | -4.75839100 | 1.88745300  | -1.51771100 |
| H  | -1.00876600 | 0.78279800  | -3.47047700 |
| H  | -3.02400200 | 2.60508200  | -3.44228600 |
| H  | -2.03554100 | 1.43409500  | 1.82541200  |
| H  | -1.58237200 | 4.45349700  | -1.29162800 |

## SUPPORTING INFORMATION

|   |             |             |             |
|---|-------------|-------------|-------------|
| H | -3.18017700 | 3.59765500  | 0.71715100  |
| C | -2.15243600 | -0.20431000 | -1.83359000 |
| C | -3.38106600 | 0.14166000  | -1.17435000 |
| C | -0.25994300 | 2.74863100  | -0.70539700 |
| C | -0.40539400 | 1.74454100  | 0.31272200  |
| H | -1.50659600 | -1.03244600 | -1.58159100 |
| H | 0.55188000  | 2.80379900  | -1.41754200 |
| C | -0.06079200 | -1.00947900 | 1.26364200  |
| C | -0.02303700 | -2.17991800 | 0.49370100  |
| C | -0.75971900 | -1.01297900 | 2.48427700  |
| C | -0.68145300 | -3.33287800 | 0.93168800  |
| H | 0.51840100  | -2.18978100 | -0.44584000 |
| C | -1.41310400 | -2.16644900 | 2.91848200  |
| H | -0.78169600 | -0.12296000 | 3.10457200  |
| C | -1.37447500 | -3.33010600 | 2.14333700  |
| H | -0.64068600 | -4.23474400 | 0.32744900  |
| H | -1.94772400 | -2.15665200 | 3.86391600  |
| H | -1.87895300 | -4.22895100 | 2.48612500  |
| C | -5.60097700 | -1.57390200 | -0.73495000 |
| C | -5.59672100 | -1.79358300 | -2.12201800 |
| C | -6.71921000 | -1.99263900 | 0.00840000  |
| C | -6.68751800 | -2.40077400 | -2.75045100 |
| H | -4.74185200 | -1.48813200 | -2.71854800 |
| C | -7.80949900 | -2.59482400 | -0.62122600 |
| H | -6.74537600 | -1.83461200 | 1.08353200  |
| C | -7.79866000 | -2.80030600 | -2.00433100 |
| H | -6.66815800 | -2.55692100 | -3.82583900 |
| H | -8.66900500 | -2.90154500 | -0.03104300 |
| H | -8.64778700 | -3.26835300 | -2.49437400 |
| C | -4.90238200 | 0.36042300  | 1.26690300  |
| C | -5.97132700 | 1.19063600  | 0.88745100  |
| C | -4.37548300 | 0.48868400  | 2.56159700  |
| C | -6.47358400 | 2.14852300  | 1.76976700  |
| H | -6.41844400 | 1.08076300  | -0.09562800 |
| C | -4.87695500 | 1.44811400  | 3.44613200  |
| H | -3.56382000 | -0.16120300 | 2.87654200  |
| C | -5.92244000 | 2.28424300  | 3.04883900  |
| H | -7.29726500 | 2.78671000  | 1.46143100  |
| H | -4.45438200 | 1.53685200  | 4.44317900  |
| H | -6.31514800 | 3.03021000  | 3.73419000  |
| C | 1.52320300  | 1.11125600  | 2.32200900  |
| C | 1.38109900  | 2.44582300  | 2.72386200  |
| C | 2.29888300  | 0.23875400  | 3.10538700  |
| C | 2.00181200  | 2.90060300  | 3.89176900  |
| H | 0.79242500  | 3.13616800  | 2.12898200  |
| C | 2.91266400  | 0.69424900  | 4.27164700  |
| H | 2.42659500  | -0.79719300 | 2.80380900  |
| C | 2.76733900  | 2.02849400  | 4.66745600  |
| H | 1.88218700  | 3.93758200  | 4.19273500  |
| H | 3.50560200  | 0.00854500  | 4.87044100  |

## SUPPORTING INFORMATION

|    |            |             |             |
|----|------------|-------------|-------------|
| H  | 3.24776000 | 2.38338800  | 5.57471700  |
| C  | 5.21421600 | -4.62172800 | 0.41015500  |
| C  | 5.00493000 | -5.62219200 | 1.35706000  |
| C  | 3.95238700 | -5.51900400 | 2.27296500  |
| C  | 3.10307900 | -4.40736200 | 2.24695500  |
| C  | 3.30778000 | -3.39517500 | 1.31393800  |
| C  | 4.36757100 | -3.49650200 | 0.38546400  |
| H  | 6.02495700 | -4.69870300 | -0.30733800 |
| H  | 5.66102500 | -6.48715400 | 1.37814100  |
| H  | 3.79288100 | -6.30595300 | 3.00427600  |
| H  | 2.27962300 | -4.32973000 | 2.95080300  |
| H  | 2.65103800 | -2.53221300 | 1.27857800  |
| C  | 4.53313400 | -2.44889600 | -0.56136500 |
| C  | 4.56904700 | -1.50768700 | -1.33809000 |
| Br | 1.27472200 | -1.14534700 | -2.76448500 |
| C  | 3.72648200 | 1.65234500  | 0.13169500  |
| C  | 3.39213000 | 3.11042400  | -0.17705400 |
| C  | 4.95566800 | 2.50555900  | -1.70556100 |
| C  | 4.72792800 | 1.27149600  | -0.84203600 |
| H  | 3.83264000 | 1.34275100  | 1.16768800  |
| H  | 5.58766100 | 0.70419900  | -0.48655600 |
| C  | 3.55714700 | 3.15635700  | -1.71384200 |
| H  | 3.56872100 | 4.17742200  | -2.10720600 |
| H  | 2.80871400 | 2.56994700  | -2.25676400 |
| C  | 4.64964300 | 3.91356100  | 0.27596400  |
| H  | 4.44413700 | 4.98740700  | 0.22250300  |
| H  | 4.93508300 | 3.67857600  | 1.30577700  |
| C  | 5.72998500 | 3.48806400  | -0.76910500 |
| H  | 6.07975600 | 4.34515900  | -1.35210000 |
| H  | 6.60594700 | 3.01845800  | -0.31168100 |
| H  | 2.44947400 | 3.46552500  | 0.23893400  |
| H  | 5.42976300 | 2.31288300  | -2.66744200 |
| C  | 4.36334500 | -0.28039700 | -2.05388900 |
| O  | 4.65254000 | -0.03378900 | -3.20387600 |

### TS7

B3LYP-D3/BSI SCF energy in acetonitrile: -2841.247912 a.u.

M06/BSII SCF energy in acetonitrile: -2839.992925 a.u.

M06/BSII free energy in acetonitrile: -2839.303321 a.u.

|    |             |             |             |
|----|-------------|-------------|-------------|
| Pd | 0.24522800  | 0.56603100  | -0.51788000 |
| P  | -1.37699200 | -1.01311400 | 0.09468600  |
| P  | 2.35189000  | -0.29980700 | -0.03499400 |
| Fe | 1.04976500  | -3.39413700 | -0.79208900 |
| C  | 3.08784500  | -3.12147500 | -0.59653400 |
| C  | 2.03031700  | -3.43662600 | -2.62821100 |
| C  | 2.82995200  | -4.07062000 | -1.62935100 |
| C  | 0.09247400  | -3.36661400 | 1.03411000  |
| C  | -0.32357500 | -4.93474500 | -0.60943700 |
| C  | 0.34112100  | -4.71387800 | 0.63494300  |

## SUPPORTING INFORMATION

|   |             |             |             |
|---|-------------|-------------|-------------|
| H | 3.62871500  | -3.31635300 | 0.31822700  |
| H | 1.63551200  | -3.90510600 | -3.52032300 |
| H | 3.14394800  | -5.10673500 | -1.62862600 |
| H | 0.47489100  | -2.88565600 | 1.92283600  |
| H | -0.29455600 | -5.84401100 | -1.19598400 |
| H | 0.96472800  | -5.42518900 | 1.16102100  |
| C | 1.79043200  | -2.09520700 | -2.21244400 |
| C | 2.44646500  | -1.88530900 | -0.94846700 |
| C | -0.99315200 | -3.72652400 | -0.97128500 |
| C | -0.75056100 | -2.74903000 | 0.04880300  |
| H | 1.19035400  | -1.35976400 | -2.73154300 |
| H | -1.56854100 | -3.56310400 | -1.87217700 |
| C | -1.97981300 | -0.91996000 | 1.84449800  |
| C | -1.88430600 | 0.31688100  | 2.50107200  |
| C | -2.47455200 | -2.02494800 | 2.55846600  |
| C | -2.27590100 | 0.45055500  | 3.83548500  |
| H | -1.49584500 | 1.17689400  | 1.96439200  |
| C | -2.87019000 | -1.89142700 | 3.89093600  |
| H | -2.54046600 | -2.99684600 | 2.08011000  |
| C | -2.76989000 | -0.65378000 | 4.53383700  |
| H | -2.19213800 | 1.41611000  | 4.32683800  |
| H | -3.25072700 | -2.75573100 | 4.42836700  |
| H | -3.07073200 | -0.55332500 | 5.57297200  |
| C | 3.92930500  | 0.51934000  | -0.54766200 |
| C | 4.33375900  | 0.47745200  | -1.89480100 |
| C | 4.65200100  | 1.33546900  | 0.34234900  |
| C | 5.43451700  | 1.21532900  | -2.33282600 |
| H | 3.78853900  | -0.13712400 | -2.60570600 |
| C | 5.75248400  | 2.07443400  | -0.09889200 |
| H | 4.35669000  | 1.39548000  | 1.38542700  |
| C | 6.14937200  | 2.01757300  | -1.43711000 |
| H | 5.73668100  | 1.16015400  | -3.37530100 |
| H | 6.29908800  | 2.69424600  | 0.60689200  |
| H | 7.00579900  | 2.59143700  | -1.77935900 |
| C | 2.70791500  | -0.78435500 | 1.71268000  |
| C | 3.93334900  | -1.33688400 | 2.12400600  |
| C | 1.69696600  | -0.60111800 | 2.66759000  |
| C | 4.12762700  | -1.71942800 | 3.45259800  |
| H | 4.74048800  | -1.46180400 | 1.40862400  |
| C | 1.88865600  | -0.98537800 | 3.99736100  |
| H | 0.75144700  | -0.16640200 | 2.36343200  |
| C | 3.10424700  | -1.54902000 | 4.39158700  |
| H | 5.07882900  | -2.14806300 | 3.75598000  |
| H | 1.08842200  | -0.84211300 | 4.71847500  |
| H | 3.25850700  | -1.84792200 | 5.42466700  |
| C | -2.90596600 | -1.23778900 | -0.92937000 |
| C | -4.08255400 | -1.85564500 | -0.47740800 |
| C | -2.83083700 | -0.81432100 | -2.26611700 |
| C | -5.15374000 | -2.05871500 | -1.34949400 |
| H | -4.17094500 | -2.17916600 | 0.55428000  |

## SUPPORTING INFORMATION

|    |             |             |             |
|----|-------------|-------------|-------------|
| C  | -3.89900200 | -1.03005600 | -3.14132600 |
| H  | -1.93945800 | -0.29859200 | -2.61180100 |
| C  | -5.06171300 | -1.65577600 | -2.68562600 |
| H  | -6.06112800 | -2.53269700 | -0.98507500 |
| H  | -3.82516900 | -0.70045300 | -4.17430700 |
| H  | -5.89566800 | -1.81923000 | -3.36251200 |
| C  | -4.60401400 | 2.05054600  | 1.48067800  |
| C  | -5.84946500 | 1.42456200  | 1.46457200  |
| C  | -6.45854800 | 1.09840700  | 0.24924200  |
| C  | -5.81335700 | 1.39663500  | -0.95505100 |
| C  | -4.56354700 | 2.01231100  | -0.94918500 |
| C  | -3.94469200 | 2.34859600  | 0.27205200  |
| H  | -4.12944700 | 2.30333200  | 2.42255500  |
| H  | -6.34546800 | 1.19237300  | 2.40272400  |
| H  | -7.42874200 | 0.61010100  | 0.23988900  |
| H  | -6.27744600 | 1.13495900  | -1.90074100 |
| H  | -4.05187800 | 2.22919800  | -1.88106700 |
| C  | -2.66769600 | 2.98895400  | 0.27174900  |
| C  | -1.58028600 | 3.52249000  | 0.21182600  |
| Br | -0.33659900 | 2.13249600  | -2.68806900 |
| C  | 0.78059400  | 3.75711000  | -0.73717600 |
| C  | 1.94687800  | 3.48117000  | 0.13183000  |
| C  | 0.40425500  | 4.34425000  | 1.55485400  |
| C  | -0.33815500 | 4.28401400  | 0.16692500  |
| H  | 0.92758000  | 4.18193700  | -1.71821900 |
| H  | -0.58653800 | 5.29660500  | -0.18598000 |
| C  | 1.31608900  | 3.10466600  | 1.48681700  |
| H  | 2.04717300  | 3.06737500  | 2.29935000  |
| H  | 0.77072000  | 2.15659600  | 1.43962700  |
| C  | 2.45786900  | 4.95699100  | 0.43840000  |
| H  | 3.46270500  | 4.85116600  | 0.85982700  |
| H  | 2.53765700  | 5.57223200  | -0.46180900 |
| C  | 1.42729600  | 5.49543200  | 1.47039000  |
| H  | 1.89544000  | 5.65491100  | 2.44595800  |
| H  | 0.96844100  | 6.43796100  | 1.15815200  |
| H  | 2.72920600  | 2.85955900  | -0.29068100 |
| H  | -0.29121900 | 4.40205200  | 2.39313500  |

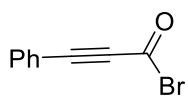

B3LYP-D3/BSI SCF energy in acetonitrile: -434.5338761 a.u.

M06/BSII SCF energy in acetonitrile: -434.2969957 a.u.

M06/BSII free energy in acetonitrile: -434.2257177 a.u.

|   |            |             |             |
|---|------------|-------------|-------------|
| C | 2.95031200 | 1.21076500  | 0.00035700  |
| C | 4.30191200 | 0.88345200  | 0.00041300  |
| C | 4.69897200 | -0.45866100 | 0.00001900  |
| C | 3.74459400 | -1.48254300 | -0.00039200 |
| C | 2.38906200 | -1.17213700 | -0.00039400 |

## SUPPORTING INFORMATION

|    |             |             |             |
|----|-------------|-------------|-------------|
| C  | 1.98335400  | 0.18113600  | 0.00002700  |
| H  | 2.62854600  | 2.24696700  | 0.00064000  |
| H  | 5.04782900  | 1.67215900  | 0.00075700  |
| H  | 5.75611800  | -0.70759300 | 0.00003500  |
| H  | 4.05977200  | -2.52125600 | -0.00073100 |
| H  | 1.63868500  | -1.95617300 | -0.00073400 |
| C  | 0.60677900  | 0.50185600  | -0.00001100 |
| C  | -0.58415900 | 0.76731300  | -0.00004700 |
| C  | -1.94240500 | 1.07958600  | -0.00025400 |
| O  | -2.53210100 | 2.11428600  | -0.00061400 |
| Br | -3.07899100 | -0.70608500 | 0.00019000  |

## 10. References

- (1) (a) Hofmeister, H.; Annen, K.; Laurent, H.; Wiechert, R. A Novel Entry to 17  $\alpha$ -Bromo- and 17  $\alpha$ -Iodoethynyl Steroids. *Angew. Chem. Int. Ed.* **1984**, *23*, 727-729; (b) Ji, X.; Nie, J.; Peng, X.; Hu, J.; Xu, X.; Huang, Y.; Li, Y. Palladium-Catalyzed Cross Haloalkynylation of Haloalkynes, *Org. Lett.* **2022**, *24*, 3384-3388; (c) Ji, X.; Peng, X.; Hong, H.; Xu, Y.; Nie, J.; Chen, L.; Mo, Z.; Li, Y.; Jiang, H. Expedient Synthesis of Dihaloalkenyne *via* Pd-Catalyzed Haloalkynylation Reaction, *Chem. Eur. J.* **2023**, e202300068.
- (2) Bhoyare, V. W.; Carriza, E. D. S.; Chintawar, C. C.; Gandon, V.; Patil, N. Gold-Catalyzed Heck Reaction. *J. Am. Chem. Soc.* **2023**, *145*, 8810–8816.
- (3) Cruz, D. A.; Sinka, V.; De Armas, P.; Steingruber, H. S.; Fernández, I.; Martín, V. S.; Miranda, P. O.; Padrón, J. I. Iron(II) and Copper(I) Control the Total Regioselectivity in the Hydrobromination of Alkenes. *Org. Lett.* **2021**, *15*, 6105–6109.
- (4) Boechat, N.; Da Costa, J. C. S.; Mendonca, J. De. S.; De Oliveira, P. S. M.; De Souza, M. V. N. A Simple Reduction of Methyl Aromatic Esters to Alcohols using Sodium Borohydride–methanol System. *Tetrahedron Letts.* **2004**, *45*, 6021–6022.
- (5) Wang, Y. G.; Wachi, M.; Kobayashi, Y. Synthesis of Alaremycin. *Synlett.*, **2006**, *3*, 481-483.
- (6) Bellina, F.; Colzi, F.; Manina, L.; Rossi, R.; Viel, S. Reaction of Alkynes with Iodine onochloride Revisited, *J. Org. Chem.* **2003**, *68*, 10175-10177.
- (7) Chen, S. Y.; Zeng, Y. F.; Zou, W. X.; Shen, D. T.; Zheng, Y. C.; Song, J. L.; Zhang, S. S. Divergent Synthesis of Tetrasubstituted Phenols *via* [3+3] Cycloaddition Reaction of Vinyl Sulfoxonium Ylides with Cyclopropenones, *Org. Lett.* **2023**, *25*, 4286–4291.
- (8) Marenich, A. V.; Cramer, C. J.; Truhlar, D. G. Universal Solvation Model Based on Solute Electron Density and on a Continuum Model of the Solvent Defined by the Bulk Dielectric Constant and Atomic Surface Tensions. *J. Phys. Chem. B.* **2009**, *113*, 6378-6396.
- (9) (a) Noodleman, L.; Lovell, T.; Han, W.-G.; Li, J.; Himo, F. Quantum Chemical Studies of Intermediates and Reaction Pathways in Selected Enzymes and Catalytic Synthetic Systems, *Chem. Rev.* **2004**, *104*, 459-508; (b) Noodleman, L. Valence Bond Description of Antiferromagnetic Coupling in Transition Metal Dimers, *J. Chem. Phys.* **1981**, *74*, 5737-5743; (c) Noodleman, L.; Case,



## SUPPORTING INFORMATION

D. A. Density-Functional Theory of Spin Polarization and Spin Coupling in Iron—Sulfur Clusters, *Adv. Inorg. Chem.* **1992**, *38*, 423-458.

(10) Grimme, S.; Antony, J.; Ehrlich, S.; Krieg, H. A Consistent and Accurate *ab Initio* Parametrization of Density Functional Dispersion Correction (DFT-D) for the 94 Elements H-Pu, *J. Chem. Phys.* **2010**, *132*, 154104.

(11) (a) Dolg, M.; Wedig, U.; Stoll, H.; Preuss, H. Energy-adjusted *ab Initio* Pseudopotentials for the First Row Transition Elements, *J. Chem. Phys.* **1987**, *86*, 866-872; (b) Andrae, D.; Häussermann, U.; Dolg, M.; Stoll, H. Preuss, H. Energy-adjusted *ab Initio* Pseudopotentials for the Second and Third row Transition Elements, *Theor. Chim. Acta.* **1990**, *77*, 123-141; (c) Roy, L. E.; Hay, P. J.; Martin, R. L. Revised Basis sets for the LANL Effective Core Potentials, *J. Chem. Theory. Comput.* **2008**, *4*, 1029-1031.

(12) (a) Zhao, Y.; Truhlar, D. G. Benchmark Energetic Data in a Model System for Grubbs II Metathesis Catalysis and Their Use for the Development, Assessment, and Validation of Electronic Structure Methods, *J. Chem. Theory Comput.* **2009**, *5*, 324-333; (b) Zhao, Y.; Truhlar, D. G. The M06 Suite of Density Functionals for Main Group Thermochemistry, Thermochemical Kinetics, Noncovalent Interactions, Excited States, and Transition Elements: two new Functionals and Systematic Testing of Four M06-class Functionals and 12 other Functionals, *Theor. Chem. Acc.* **2008**, *120*, 215-241; (c) Zhao, Y.; Truhlar, D. G. Density Functionals with Broad Applicability in Chemistry, *Acc. Chem. Res.* **2008**, *41*, 157-161.

(13) Frisch, M. J.; Trucks, G. W.; Schlegel, H. B.; Scuseria, G. E.; Robb, M. A.; Cheeseman, J. R.; Scalmani, G.; Barone, V.; Mennucci, B.; Petersson, G. A.; Nakatsuji, H.; Caricato, M.; Li, X.; Hratchian, H. P.; Izmaylov, A. F.; Bloino, J.; Zheng, G.; Sonnenberg, J. L.; Hada, M.; Ehara, M.; Toyota, K.; Fukuda, R. Hasegawa, J.; Ishida, M.; Nakajima, T.; Honda, Y.; Kitao, O.; Nakai, H.; Vreven, T.; Montgomery, Jr. J. A.; Peralta, J. E.; Ogliaro, F.; Bearpark, M.; Heyd, J. J.; Brothers, E.; Kudin, K. N.; Staroverov, V. N.; Keith, T.; Kobayashi, R.; Normand, J.; Raghavachari, K.; Rendell, A.; Burant, J. C.; Iyengar, S. S.; Tomasi, J.; Cossi, M.; Rega, N.; Millam, J. M.; Klene, M.; Knox, J. E.; Cross, J. B.; Bakken, V.; Adamo, C.; Jaramillo, J.; Gomperts, R.; Stratmann, R. E.; Yazyev, O.; Austin, A. J.; Cammi, R.; Pomelli, C.; Ochterski, J. W.; Martin, R. L.; Morokuma, K.; Zakrzewski, V. G.; Voth, G. A.; Salvador, P.; Dannenberg, J. J.; Dapprich, S.; Daniels, A. D.; Farkas, O.; Foresman,

## SUPPORTING INFORMATION

J. B.; Ortiz, J. V.; Cioslowski, J.; Fox, D. J. Gaussian 09, Rev. A.01; Gaussian, Inc.: Wallingford, CT, **2010**.

(14) Legault, C. Y. *CYLView, version 1.0 b*; Université de Sherbrooke: Sherbrooke, Quebec, Canada, **2009**. <http://www.cylview.org>.

(15) Wang, F.; Xu, P.; Fei, C. Silver-Mediated Oxidative Functionalization of Alkylsilanes. *Chem. Sci.*, **2018**, *9*, 8836-8841.

(16) Mykhaylo, S. F.; Zhang, W.; Przemyslaw, W. Developing Antineoplastic Agents that Target Peroxisomal Enzymes: Cytisine-linked Isoflavonoids as Inhibitors of Hydroxysteroid 17-Beta-dehydrogenase-4. *Org. Biomol. Chem.*, **2017**, *15*, 7623-7629.

(17) Mao, Y.; Liu, Y. Q.; Yu, L.; Ni, S. Y.; Wang, Y.; Pan, Y. Uranyl-catalysed C–H alkynylation and olefination. *Org. Chem. Front.* **2021**, *8*, 5968-5974.

(18) Feng, Y. S.; Xu, Z. Q.; Mao, L. Copper Catalyzed Decarboxylative Alkynylation of Quaternary  $\alpha$ -Cyano Acetate Salts. *Org. Lett.* **2013**, *15*, 1472-1475.
